# Supplementary material for: The Catalytic-Dependent and -Independent Roles of Lsd1 and Lsd2 Lysine Demethylases in Heterochromatin Formation in Schizosaccharomyces pombe
Source: Cells. 2020 Apr 13;9(4):955. doi: 10.3390/cells9040955 (PMC7226997; doi:10.3390/cells9040955)
Supplement: Supplementary file 1 [file cells-09-00955-s001.tgz]

Archive with 4 entries (4 files):
- Supplemental figures_Marayati.pdf
- Supplemental Table S1_ Alist of strains.xlsx
- Supplemental Table S2_A list of oligos.xlsx
- Supplemental Table S3_DEG gene_RNA seq.xlsx
