# Supplementary material for: The Catalytic-Dependent and -Independent Roles of Lsd1 and Lsd2 Lysine Demethylases in Heterochromatin Formation in Schizosaccharomyces pombe
Source: Cells. 2020 Apr 13;9(4):955. doi: 10.3390/cells9040955 (PMC7226997; doi:10.3390/cells9040955)
Supplement: Supplementary file 1 [file cells-09-00955-s001.tgz › Supplemental Table S1_ Alist of strains.xlsx]

## Sheet: Sheet1
Strain name	Mating type	leu1	ade6	his2	ura4	Epigenetic reporter	Genetic background	Figures strain appeared
SPWF21	smt0	leu1-32	210	his2	DS/E	otr1R(Sph1)::ura4+	WT	all wild-type strains
SPFM329	smt0	leu1-32	216	his2	DS/E	otr1R(Sph1)::ura4+	Lsd1-FTP::NAT	4, 6, 7
SPFM370	smt0	leu1-32	210 or 216	his2	DS/E	otr1R(Sph1)::ura4+	Lsd2-FTP::NAT	4, 6, 7
SPJT373	smt0	leu1-32	DN/N	plus	DS/E	otr1R(Sph1)::ura4+, mat2::ade6+	lsd2-N1::kanMX	1, supp.1
SPJT374	smt0	leu1-32	DN/N	plus	DS/E	otr1R(Sph1)::ura4+, mat2::ade6+	lsd2-N2::kanMX	1, supp.1
SPJT385	diploid	leu1-32//leu1-32	210//216	his2//plus	DS/E//DS/E	otr1R(Sph1)::ura4+//-	lsd2-N3-GFP::kanMX//lsd2+	1
SPJT424	smt0	leu1-32	210	his2	DS/E	otr1R(Sph1)::ura4+	lsd2-N4-GFP::kanMX	1, supp.1
SPJT421	diploid	leu1-32//leu1-32	210//216	his2//plus	DS/E//DS/E	otr1R(Sph1)::ura4+//otr1R(Sph1)::ura4+	lsd2-N4-GFP::kanMX//lsd2+	1
SPJT422	diploid	leu1-32//leu1-32	210//216	his2//plus	DS/E//DS/E	otr1R(Sph1)::ura4+//otr1R(Sph1)::ura4+	lsd2-N5-GFP::kanMX//lsd2+	1
SPJT378	smt0	leu1-32	DN/N	plus	DS/E	otr1R(Sph1)::ura4+, mat2::ade6+	lsd1Δ::NATN2	2, supp.4, supp.6
SPJT444	smt0	leu1-32	210	his2	DS/E	otr1R(Sph1)::ura4+	lsd1-ao-myc::KanMX	2, 3, 4, supp.4, supp.6, supp.9
SPJT439	smt0	leu1-32	210	his2	DS/E	otr1R(Sph1)::ura4+	lsd1-ΔC-FTP::NAT	2, 3, supp.4, supp.6
SPJT437	smt0	leu1-32	210	his2	DS/E	otr1R(Sph1)::ura4+	lsd1-ΔHMG-FTP::NAT	2, 4, 6, 7, supp.4, supp.6
SPJT370	smt0	leu1-32	210	his2	DS/E	otr1R(Sph1)::ura4+	lsd2-ao-GFP::kanMX	2, 3, 4, supp.4, supp.6, supp.9
SPJT441	smt0	leu1-32	216	his2	DS/E	otr1R(Sph1)::ura4+	lsd2-ΔC-FTP::NAT	2, 3, 4, 6, 7, supp.4, supp.6
SPJT617	smt0	leu1-32	210	his2	DS/E	otr1R(Sph1)::ura4+	lsd1-ao-ΔC-FTP::NAT	3
SPJT564	smt0	leu1-32	210	his2	DS/E	otr1R(Sph1)::ura4+	lsd1-ΔC-FTP::NAT lsd2-ao-GFP::KanMX	3
SPJT477	smt0	leu1-32	210	his2	DS/E	otr1R(Sph1)::ura4+	lsd1-ao-myc::kanMX, lsd2-ΔC-FTP::NAT	3
SPJT523	smt0	leu1-32	210	his2	DS/E	otr1R(Sph1)::ura4+	lsd1-ao-myc::kanMX, lsd2-ao-GFP::kanMX	3
SPVH3	smt0	leu1-32	216	his2	DS/E	otr1R(Sph1)::ura4+	ago1∆::kanmx	4, supp.9
SPJT525	smt0	leu1-32	210 or 216	his2	DS/E	otr1R(Sph1)::ura4+	ago1Δ::kanMX lsd1-ΔHMG-FTP::NAT	4
SPJT467	smt0	leu1-32	210 or 216	his2	DS/E	otr1R(Sph1)::ura4+	ago1Δ::kanMX lsd2-ΔC-FTP::NAT	4
SPJT377	smt0	leu1-32	216	his2	DS/E	otr1R(Sph1)::ura4+	ago1Δ::kanMX, lsd2-ao-GFP::kanMX	4, supp.9
SPJT615	smt0	leu1-32	210 or 216	his2	DS/E	otr1R(Sph1)::ura4+	ago1Δ::kanMX lsd1-ao-myc::kanMX	4, supp.9
SPJT547	smt0	leu1-32	210	his2	DS/E	otr1R(Sph1)::ura4+, kΔ::ade6+ (off)	lsd1-ao-myc::kanMX, lsd2-ao-GFP::kanMX	4, 5, supp.5
SPJT491	smt0	leu1-32	DN/N	his2	DS/E or ura4+	otr1R(Sph1)::ura4+?, kΔ::ade6+ (off)	WT	5, supp.5
SPJT578	smt0	leu1-32	DN/N	his2	DS/E or ura4+	otr1R(Sph1)::ura4+?, kΔ::ade6+ (off)	swi6Δ::kanMX	5, supp.5
SPJT484	smt0	leu1-32	DN/N	his2	DS/E or ura4+	otr1R(Sph1)::ura4+?, kΔ::ade6+ (off)	lsd1-ΔHMG-FTP::NAT	5, supp.5
SPJT486	smt0	leu1-32	DN/N	his2	DS/E or ura4+	otr1R(Sph1)::ura4+?, kΔ::ade6+ (off)	lsd2-ΔC-FTP::NAT	5, supp.5
SPJT472	smt0	leu1-32	210 or 216	his2	DS/E	otr1R(Sph1)::ura4+	epe1Δ::kanMX	6
SPJT473	smt0	leu1-32	210 or 216	his2	DS/E	otr1R(Sph1)::ura4+	epe1Δ::kanMX lsd1-ΔHMG-FTP::NAT	6
SPJT474	smt0	leu1-32	210	his2	DS/E	otr1R(Sph1)::ura4+	epe1Δ::kanMX lsd2-ΔC-FTP::NAT	6
SPKZ364	smt0	leu1-32	210	his2	DS/E	otr1R(Sph1)::ura4+	clr3Δ::KanMX	7
SPJT471	smt0	leu1-32	210	his2	DS/E	otr1R(Sph1)::ura4+	clr3Δ::kanMX lsd1-ΔHMG-FTP::NAT	7
SPJT470	smt0	leu1-32	210	his2	DS/E	otr1R(Sph1)::ura4+	clr3Δ::kanMX lsd2-ΔC-FTP::NAT	7
SPJT72	smt0	leu1-32	216	his2	D18	otr1R(Sph1)::Ura4+	sir2Δ::kanMX	7
SPJT646	smt0	leu1-32	210	his2	DS/E	otr1R(Sph1)::ura4+	sir2Δ::kanMX lsd1-ΔHMG-FTP::NAT	7
SPJT650	smt0	leu1-32	210 or 216	his2	DS/E	otr1R(Sph1)::ura4+	sir2Δ::kanMX lsd2-ΔC-FTP::NAT	7
SPKZ358	smt0	leu1-32	216	his2	DS/E	otr1R(Sph1)::ura4+	clr6-1	7
SPJT685	smt0	leu1-32	210 or 216	plus	DS/E or ura4+	otr1R(Sph1)::ura4+?	clr6-1 lsd1-ΔHMG-FTP::NAT	7
SPJT653	smt0	leu1-32	210 or 216	his2	DS/E	otr1R(Sph1)::ura4+	clr6-1 lsd2-ΔC-FTP::NAT	7
SPJT433	diploid	leu1-32//leu1-32	210//216	his2//plus	DS/E//DS/E	otr1R(Sph1)::ura4+//otr1R(Sph1)::ura4+	lsd1-ΔC-FTP::NAT//lsd1+	supp.2
SPJT432	diploid	leu1-32//leu1-32	210//216	his2//plus	DS/E//DS/E	otr1R(Sph1)::ura4+//otr1R(Sph1)::ura4+	lsd1-ΔHMG-FTP::NAT//lsd1+	supp.2, supp.3
SPJT435	diploid	leu1-32//leu1-32	210//216	his2//plus	DS/E//DS/E	otr1R(Sph1)::ura4+//otr1R(Sph1)::ura4+	lsd2-ΔC-FTP::NAT//lsd1+	supp.2, supp.3
SPJT434	diploid	leu1-32//leu1-32	210//216	his2//plus	DS/E//DS/E	otr1R(Sph1)::ura4+//otr1R(Sph1)::ura4+	lsd2-ΔHMG-FTP::NAT//lsd1+	supp.2
SPWF73	diploid	leu1-32//leu1-32	210//216	his2//plus	DS/E//DS/E	otr1R(Sph1)::ura4+//otr1R(Sph1)::ura4+	WT	supp.2
SPJT475	h90	leu1-32	210 or 216	his2	DS/E or ura4+	otr1R(Sph1)::ura4+?	lsd1-ΔHMG-NAT::NAT	supp.2
SPJT476	h90	leu1-32	210 or 216	his2	DS/E	otr1R(Sph1)::ura4+	lsd2-ΔC-FTP::NAT	supp.2
SPG1407	h90	leu1-32	216	his2 or plus	DS/E	-	clr4Δ::KanMX	supp.2
SPJT502	diploid	leu1-32//leu1-32	210//216	his2//plus	DS/E//DS/E	otr1R(Sph1)::ura4+//otr1R(Sph1)::ura4+	lsd1-ΔHMG-FTP::NAT//lsd1-ΔHMG-FTP::NAT	supp.3
SPJT503	diploid	leu1-32//leu1-32	210//216	his2//plus	DS/E//DS/E	otr1R(Sph1)::ura4+//otr1R(Sph1)::ura4+	lsd2-ΔC-FTP::NAT//lsd2-ΔC-FTP::NAT	supp.3
