# Supplementary material for: The Catalytic-Dependent and -Independent Roles of Lsd1 and Lsd2 Lysine Demethylases in Heterochromatin Formation in Schizosaccharomyces pombe
Source: Cells. 2020 Apr 13;9(4):955. doi: 10.3390/cells9040955 (PMC7226997; doi:10.3390/cells9040955)
Supplement: Supplementary file 1 [file cells-09-00955-s001.tgz › Supplemental Table S2_A list of oligos.xlsx]

## Sheet: Sheet1
Primer Function	Primer Name	Primer Sequence	Notes
KanMX (genotyping)	KAN2	ATCATTGGCAACGCTACCTT
KanMX (genotyping)	KAN3	GCGCAATCACGAATGAATAA
NATN2 (genotyping)	NAT2	GGTGTCGGTGGTGAAGGACC
ago1Δ (genotyping)	ago1RV4	CTGAAGCTAGAGATGGCATGG	pair with kan2
clr3Δ (genotyping)	clr3RV2	CACGTGCTAACCATTACACC	pair with kan3
epe1Δ (genotyping)	epe1RV2	GTGTGTTGTAGTATCCGGCT	pair with kan3
lsd1-ao (genotyping)	lsd1F6	TCAACACCTTCTCCACTTCC
	lsd1aocheckR	AAAAATGAGGATAACAGCAGC
lsd1-ΔHMG-FTP (genotyping) and lsd1-ΔC-FTP (genotyping)	lsd1ctdcheckF1	CGTCTCCTGTTCCACCATCA	pair with Nat2
lsd2-ao (genotyping)	lsd2FW4	ATGGTGTTTTAAGGTCGCGG
	lsd2aocheckRV	AATAAATAAAAACCTACAGCAGC
lsd2-ΔC-FTP (genotyping)	lsd2ctdcheckF1	GCTTGTAACTGAACTTCTTGG	pair with Nat2
set1Δ (genotyping)	set1rv2	ACTTCATTGATGGCTTCCCG	pair with kan3
sir2Δ (genotyping)	sir2RV2	ATGGGTCTTATGCTGCCCAA	pair with kan3
act1 (qPCR)	q_act_FOR	GGTTTCGCTGGAGATGATG
	q_act_REV	ATACCACGCTTGCTTTGAG
ade6 (qPCR)	q_ade6_FOR	ATGCTTATCCTACAACTGAGACC
	q_ade6_REV	TGAATTGAGAAGGGAAGACGAG
leu1 (qPCR)	qLeu1F1	ATTGCTCGTTTGGCTGCTTG
	qLeu1R1	TACAGTCTTGCGCCAAAGAC
centromere (dgdh) (qPCR)	q_cen(dg)_FOR	AATTGTGGTGGTGTGGTAATAC
	q_cen(dg)_REV	GGGTTCATCGTTTCCATTCAG
mat locus (cenH) (qPCR)	q_mat_FOR	GTCCGAGGCAATACAACTTTGG
	q_mat_REV	GGTTGACAGTAGGAGATATTTACAG
telomere (tlh1) (qPCR)	q_tlh_FOR	GGATAAGCCAATCATCGTTGAG
	q_tlh_REV	GTAGTTGACGCTCCTTGGAAG
lsd1-ΔHMG Fragment 1	lsd1inF1	CAATATTGTCTGAGCCCATTG
	lsd1C1R	TTAATTAACCCGGGGATCCGTGATGGTGGAACAGGAGACG
lsd1-ΔHMG Fragment 3 and lsd1-ΔC Fragment 3	lsd1KanFW2	CGAGCTCGAATTCATCGATGTCGAAGCTTCCTAACCACC
	lsd1RV3	AACAAGTAATTCCTGTCCATTG
lsd1-ΔC Fragment 1	lsd1C2R	TTAATTAACCCGGGGATCCGTTTGGGCAACTCTCACATTGTA	pair with lsd1inF1
lsd2-ΔHMG Fragment 1	lsd2F6	AGAAATGGTGTCTATGACGGC
	lsd2C1R	TTAATTAACCCGGGGATCCGACCAAGAAGTTCAGTTACAAGC
lsd2-ΔHMG Fragment 3 and lsd2-ΔC Fragment 3	lsd2KanFW2	CGAGCTCGAATTCATCGATCGTCATGCCCTAAATGAAGC
	lsd2RV3	CGGCATTAAATCAGGTTGGC
lsd2-ΔC Fragment 1	lsd2C2R	TTAATTAACCCGGGGATCCGATTTCGTATTTGCTCGGCTCT	pair with Lsd2F6
lsd2-N1 Fragment 1	lsd2T1R	GGGATACTGGCTCCTGCAGACTCTGTCATTTCTGGAAAGTC	pair with lsd25'FW1
lsd2-N1 Fragment 2	lsd2T1F	GACTTTCCAGAAATGACAGAGTCTGCAGGAGCCAGTATCCC	pair with lsd2RV3
lsd2-N2 Fragment 1	lsd2T2R	GGGATACTGGCTCCTGCAGATTGATTAGCCGCTTGCGAAAT	pair with lsd25'FW1
lsd2-N2 Fragment 2	lsd2T2F	ATTTCGCAAGCGGCTAATCAATCTGCAGGAGCCAGTATCCC	pair with lsd2RV3
lsd2-N3 Fragment 1	lsd2T4R	GGGATACTGGCTCCTGCAGACATTCAATTGCCTATTTATCTGA	pair with lsd25'FW1
lsd2-N3 Fragment 2	lsd2T4F	TCAGATAAATAGGCAATTGAATGTCTGCAGGAGCCAGTATCCC	pair with lsd2RV3
lsd2-N4 Fragment 1	lsd2T9R	GGGATACTGGCTCCTGCAGAACCATCTGGATCATTCTCGC	pair with lsd25'FW1
lsd2-N4 Fragment 2	lsd2T9F	GCGAGAATGATCCAGATGGTTCTGCAGGAGCCAGTATCCC	pair with lsd2RV3
lsd2-N5 Fragment 1	lsd2T10R	GGGATACTGGCTCCTGCAGAAGATACAATCAAAGTGAACCGA	pair with lsd25'FW1
lsd2-N5 Fragment 2	lsd2T10F	TCGGTTCACTTTGATTGTATCTTCTGCAGGAGCCAGTATCCC	pair with lsd2RV3
lsd1-ao fragment 1	lsd1FW4	TAGTAAACAGCCCCTTCATTC
	LSD1aoR	AAAAATGAGGATAACAGCAGCCACATTGGTAAAATG
lsd1-ao fragment 2	LSD1aoF	CATTTTACCAATGTGGCTGCTGTTATCCTCATTTTT	pair with lsd1RV3
lsd2-ao fragment 1	lsd2aoRV1	TAAATAAAAACCTACAGCAGCTCCGGGTTTGAAATC	pair with lsd2FW4
lsd2-ao fragment 2	lsd2aoFW1	GATTTCAAACCCGGAGCTGCTGTAGGTTTTTATTTA
