# Supplementary material for: The Catalytic-Dependent and -Independent Roles of Lsd1 and Lsd2 Lysine Demethylases in Heterochromatin Formation in Schizosaccharomyces pombe
Source: Cells. 2020 Apr 13;9(4):955. doi: 10.3390/cells9040955 (PMC7226997; doi:10.3390/cells9040955)
Supplement: Supplementary file 1 [file cells-09-00955-s001.tgz › Supplemental Table S3_DEG gene_RNA seq.xlsx]

## Sheet: lsd1-dHMG
Gene	logFC	AveExpr	t	P.Value	adj.P.Val	B	C1	C2	C3	T7	T8	T9
SPBC16E9.16c	4.4597	6.76806	55.2538	3.76615e-11	2.39489e-07	15.7904	524	562	549	12048	12890	14118
SPAC13G7.02c	3.20219	7.90722	40.9899	3.59222e-10	3.63154e-07	14.1571	1759	1901	1912	17978	18057	19536
SPAC22H10.13	4.30317	5.81617	40.4131	3.99761e-10	3.63154e-07	13.9009	268	317	309	6117	7007	5998
SPAC23H3.15c	4.61507	5.04077	41.8074	3.09493e-10	3.63154e-07	13.8121	159	180	131	4191	3871	4391
SPBC30B4.09	2.86489	5.06708	43.5597	2.27024e-10	3.63154e-07	14.3554	293	300	280	2237	2406	2259
SPBC365.12c	2.13312	6.49878	40.5707	3.88194e-10	3.63154e-07	14.1877	1010	1034	994	4593	4922	4934
SPNCRNA.832	4.64068	5.02547	41.4175	3.32167e-10	3.63154e-07	13.7492	152	179	130	4182	3863	4385
SPAC4H3.08	2.83229	6.14217	37.3258	7.27932e-10	5.78615e-07	13.557	582	645	637	4781	5059	4539
SPBC2A9.14	2.77576	4.73196	34.9283	1.20052e-09	8.48236e-07	12.9158	254	237	223	1819	1835	1655
SPAC637.03	3.61794	6.17023	33.9056	1.50172e-09	8.68132e-07	12.8501	515	553	391	5934	6841	6522
SPBC354.11c	2.93558	4.954	33.9816	1.4766e-09	8.68132e-07	12.7662	285	275	230	2213	2295	2041
SPNCRNA.1277	1.50548	6.09187	33.3707	1.69275e-09	8.97015e-07	12.7856	979	968	902	2883	2896	2986
SPAC3A11.10c	1.97202	7.52362	32.3555	2.13602e-09	1.04484e-06	12.5567	2185	2111	2243	9026	9483	9288
SPBC119.03	2.29041	7.19755	31.1371	2.85135e-09	1.13323e-06	12.2717	1615	1625	1436	7862	9197	7775
SPBC21C3.19	2.58648	7.18536	31.3383	2.71644e-09	1.13323e-06	12.3184	1293	1397	1497	9181	9112	8902
SPBPB21E7.01c	2.65178	5.51684	31.6664	2.51168e-09	1.13323e-06	12.3621	414	449	422	2701	3166	2901
SPAC1B3.06c	1.3366	7.09383	29.8435	3.92323e-09	1.29346e-06	11.9482	2046	2080	1925	5364	5629	5565
SPAC22G7.06c	-1.7349	9.5738	-29.6998	4.06812e-09	1.29346e-06	11.8705	33994	33149	30794	10437	10498	10924
SPBC354.12	3.52976	9.6248	29.9724	3.79813e-09	1.29346e-06	11.9072	5931	5937	4600	65410	74018	65471
SPBC8D2.18c	-1.65667	8.96884	-30.0985	3.68012e-09	1.29346e-06	12.0008	21795	21321	19569	7386	7120	7016
SPBC29A10.01	-1.86084	7.61699	-29.1972	4.62503e-09	1.4005e-06	11.7869	8531	8617	9179	2571	2690	2599
SPBC27.04	1.70682	7.25292	28.9074	4.98516e-09	1.44094e-06	11.7079	2032	2063	1851	6497	7251	7298
SPAC1002.09c	-1.54797	8.29039	-28.1735	6.04761e-09	1.53827e-06	11.5209	13279	13142	11360	4548	4689	4722
SPAC688.04c	1.73212	6.46491	28.2596	5.91049e-09	1.53827e-06	11.5351	1240	1167	1013	4096	4240	3951
SPBC2A9.13	2.72746	3.81302	28.3013	5.8454e-09	1.53827e-06	11.3516	131	129	123	949	961	851
SPBC1709.01	1.41447	5.46444	27.9157	6.47991e-09	1.58484e-06	11.4528	642	659	602	1809	1874	1814
SPAC869.02c	1.31349	7.86456	26.5987	9.31377e-09	1.79473e-06	11.075	3486	3637	3288	9199	9569	9256
SPCC736.13	1.2649	7.49452	26.6951	9.06443e-09	1.79473e-06	11.0933	2805	2771	2613	6849	7399	7081
SPCC737.04	3.82189	5.18668	27.2897	7.6829e-09	1.79473e-06	11.2425	208	233	241	3136	4015	3342
SPCC790.02	1.57163	7.12894	27.1253	8.03956e-09	1.79473e-06	11.2157	1874	1902	1937	6038	5950	6422
SPCC830.07c	1.63608	7.67654	26.7471	8.93292e-09	1.79473e-06	11.1178	2857	2907	2427	9141	9023	9346
SPNCRNA.1447	1.66232	7.31655	26.8013	8.79819e-09	1.79473e-06	11.1263	2161	2215	1938	6677	7475	7508
SPNCRNA.867	2.0213	3.658	26.8495	8.68045e-09	1.79473e-06	11.0189	153	152	135	636	662	641
SPAC26F1.04c	1.54913	6.4223	26.4207	9.79495e-09	1.83194e-06	11.0153	1241	1194	1096	3720	3962	3520
SPAC23C11.06c	1.97768	6.12628	25.8358	1.1586e-08	2.10501e-06	10.8554	842	881	757	3301	3877	3421
SPNCRNA.798	1.96525	6.10947	25.3056	1.3535e-08	2.3908e-06	10.6956	834	877	751	3239	3819	3374
SPAC11D3.01c	1.808	5.66844	24.9778	1.49244e-08	2.49748e-06	10.6074	620	715	583	2500	2435	2326
SPBC3D6.16	2.86547	3.30731	24.996	1.4843e-08	2.49748e-06	10.4055	75	90	93	666	708	661
SPAPB24D3.07c	1.89563	9.24242	24.5496	1.69891e-08	2.7091e-06	10.4911	6983	7652	7469	29084	29264	30817
SPBC359.03c	-1.57393	5.89092	-24.5396	1.7041e-08	2.7091e-06	10.4555	2544	2349	2317	950	840	836
SPAC17G6.13	1.57235	7.30363	24.136	1.92945e-08	2.92916e-06	10.3072	2063	2194	2192	6902	6610	7278
SPCC16C4.03	1.09352	6.83971	24.1273	1.93466e-08	2.92916e-06	10.2943	1893	1861	1765	4356	4299	4108
SPBC660.07	1.51045	7.30238	24.0382	1.98902e-08	2.94144e-06	10.2739	2361	2299	1943	6493	6934	6902
SPAC688.13	1.40729	5.49568	23.4867	2.36641e-08	3.26234e-06	10.1336	653	625	672	1860	1888	1852
SPBC3E7.02c	4.16471	7.41634	23.5537	2.31654e-08	3.26234e-06	10.1738	1062	1164	681	17393	18682	19229
SPBP4G3.03	3.44523	2.27581	23.4279	2.41123e-08	3.26234e-06	9.51623	34	37	31	372	420	428
SPBPB21E7.04c	4.72789	4.19774	23.5631	2.30959e-08	3.26234e-06	10.0466	92	78	80	2133	2843	2283
SPCC70.04c	2.13255	4.294	23.2265	2.57216e-08	3.40758e-06	10.0723	218	223	217	951	1088	1098
SPAC15E1.02c	1.22724	5.83373	23.0965	2.6825e-08	3.48122e-06	9.98299	932	877	816	2180	2312	2166
SPAC630.08c	-1.62891	9.25442	-22.8444	2.91195e-08	3.6308e-06	9.94638	24835	24130	26656	8939	8683	8875
SPBPB21E7.11	3.89166	2.22424	22.8569	2.9001e-08	3.6308e-06	9.26093	26	38	22	465	457	451
SPBP19A11.07c	1.15319	6.51251	22.6532	3.10088e-08	3.79202e-06	9.80232	1563	1427	1326	3499	3425	3460
SPAC25B8.12c	-1.06443	7.69283	-22.4851	3.27843e-08	3.8274e-06	9.74475	7393	7013	6670	3503	3724	3686
SPACUNK4.16c	1.46321	7.97127	22.4755	3.28891e-08	3.8274e-06	9.77038	3600	3514	3521	9748	10702	11393
SPNCRNA.291	-1.76162	4.73724	-22.4559	3.31038e-08	3.8274e-06	9.82032	1205	1085	1169	345	377	382
SPBPB10D8.03	-4.8846	1.83177	-22.366	3.41118e-08	3.87352e-06	8.72826	464	420	479	15	20	14
SPBC30D10.15	-1.17627	6.89371	-22.1441	3.67505e-08	4.09994e-06	9.61305	4178	4139	4262	2060	1996	1976
SPAC1782.06c	-1.2319	6.57027	-21.8996	3.99293e-08	4.18113e-06	9.53114	3589	3624	3064	1592	1594	1542
SPAC29A4.12c	3.69435	1.75962	21.7922	4.14233e-08	4.18113e-06	8.79452	20	21	24	285	321	322
SPAPB1A11.02	5.18197	1.81702	21.9569	3.91579e-08	4.18113e-06	8.48753	11	19	11	496	566	559
SPBC23G7.10c	1.16797	6.24864	21.8795	4.02043e-08	4.18113e-06	9.53563	1251	1184	1136	2895	3041	2762
SPCC4B3.01	1.21166	6.19505	21.8159	4.1088e-08	4.18113e-06	9.51541	1150	1171	1068	2836	2986	2688
SPCC794.04c	2.595	4.52041	21.8547	4.05456e-08	4.18113e-06	9.62452	215	228	213	1273	1605	1441
SPNCRNA.857	2.21249	6.01204	21.5614	4.48509e-08	4.45636e-06	9.45648	651	677	790	3686	3235	3681
SPCC16A11.15c	1.27657	5.32999	21.4816	4.61104e-08	4.51102e-06	9.4461	639	579	601	1602	1634	1538
SPBC725.03	2.14259	5.02421	21.3134	4.88961e-08	4.64075e-06	9.41878	346	333	416	1651	1788	1771
SPNCRNA.1096	-1.15197	6.16679	-21.3519	4.82416e-08	4.64075e-06	9.34169	2597	2551	2392	1303	1167	1208
SPBC4F6.17c	1.24721	8.05456	21.1977	5.09249e-08	4.76223e-06	9.30754	4098	4055	3990	10401	9774	11106
SPACUNK4.17	2.44292	5.78847	21.0323	5.39903e-08	4.76839e-06	9.28138	504	532	642	3449	2972	3416
SPBC1105.05	1.67124	9.23276	21.0954	5.27961e-08	4.76839e-06	9.33589	8802	8059	6983	26610	28024	27222
SPCC1183.09c	1.13101	6.89535	21.147	5.1842e-08	4.76839e-06	9.24784	1989	1954	1727	4391	4695	4357
SPCC417.08	-1.55455	11.3205	-21.0486	5.36777e-08	4.76839e-06	9.33152	107521	106201	95238	37539	37555	38703
SPBC4F6.12	1.2223	6.50588	20.8169	5.83002e-08	5.0785e-06	9.13126	1472	1467	1257	3352	3608	3634
SPCC1620.06c	-1.07083	7.08038	-20.7667	5.93579e-08	5.10077e-06	9.0987	4726	4758	4331	2462	2415	2248
SPBP23A10.12	0.973873	6.86177	20.7184	6.03974e-08	5.1209e-06	9.08297	1981	2017	1845	4216	3988	4230
SPAC222.15	2.33251	2.39649	20.2893	7.05982e-08	5.58658e-06	8.86563	59	56	49	295	318	288
SPBP4H10.15	-1.13472	9.36596	-20.3779	6.83416e-08	5.58658e-06	9.07423	23628	23485	21746	11339	11070	11553
SPCC338.12	2.55403	6.05972	20.3151	6.99324e-08	5.58658e-06	8.99528	710	764	493	4106	4397	3859
SPNCRNA.1567	1.31439	6.07624	20.2717	7.10553e-08	5.58658e-06	8.94063	1074	1063	883	2746	2781	2594
SPNCRNA.322	1.677	5.87618	20.2677	7.11611e-08	5.58658e-06	8.96202	739	876	705	2693	2819	2507
SPNCRNA.811	2.62344	3.00639	20.3547	6.89248e-08	5.58658e-06	9.00397	87	61	81	502	514	503
SPCC1393.12	2.04972	6.45899	20.1284	7.49135e-08	5.67113e-06	8.88169	1065	1040	940	4397	5311	4036
SPCC70.12c	1.84953	6.38603	20.1387	7.46285e-08	5.67113e-06	8.88354	1027	972	1106	3629	4335	4171
SPNCRNA.31	4.22195	1.81316	20.1693	7.3789e-08	5.67113e-06	8.30875	24	22	12	374	402	384
SPBC1198.14c	1.26152	5.54511	20.0963	7.58095e-08	5.67145e-06	8.9074	698	737	687	1742	1946	1829
SPAC328.03	1.6425	8.66132	20.0431	7.73225e-08	5.6986e-06	8.90835	5811	5753	4648	17603	18615	18339
SPAC4D7.02c	1.65314	6.74375	20.0208	7.79648e-08	5.6986e-06	8.82087	1562	1481	1229	4678	5286	4564
SPBC32F12.10	1.3052	9.11815	19.8731	8.23849e-08	5.7826e-06	8.86622	8232	8235	8401	21259	23080	22342
SPCC285.17	-1.2538	7.54689	-19.9234	8.08489e-08	5.7826e-06	8.78028	6800	6571	6949	3245	3056	2943
SPCC4G3.03	1.76363	4.19842	19.8613	8.27514e-08	5.7826e-06	8.90892	220	234	247	807	894	878
SPNCRNA.1695	3.24075	2.28726	19.9045	8.14241e-08	5.7826e-06	8.61547	44	40	28	357	409	381
SPBC359.02	-2.18881	3.01507	-19.7421	8.65444e-08	5.91759e-06	8.82342	432	409	374	98	108	83
SPNCRNA.1233	-1.17565	5.77546	-19.7639	8.58357e-08	5.91759e-06	8.75004	1880	1946	1968	948	917	913
SPNCRNA.866	1.65152	3.55395	19.6825	8.85165e-08	5.98805e-06	8.84383	157	153	155	498	548	541
SPAC22F3.12c	1.90967	5.98704	19.6426	8.98645e-08	6.01525e-06	8.7129	776	676	863	3016	3243	3111
SPBC776.08c	-1.00256	7.06283	-19.5759	9.21697e-08	6.10528e-06	8.62486	4469	4368	4480	2351	2377	2476
SPAC3F10.15c	0.894838	7.21417	19.5305	9.37756e-08	6.14762e-06	8.60879	2666	2634	2372	5049	5276	5118
SPBC1105.14	1.57323	6.38632	19.3654	9.98902e-08	6.48165e-06	8.56436	1105	1173	1135	3290	3744	4003
SPAC821.04c	1.02252	7.2189	19.1701	1.07714e-07	6.84952e-06	8.46169	2599	2478	2287	5090	5576	5540
SPCC338.18	3.53267	3.57545	19.191	1.06845e-07	6.84952e-06	8.6297	86	65	98	939	1168	993
SPBC27.05	1.63862	4.7492	19.0346	1.13551e-07	7.08878e-06	8.55153	380	393	304	1154	1190	1280
SPCPB1C11.02	1.67426	4.06317	19.0311	1.13706e-07	7.08878e-06	8.59037	231	226	201	714	825	742
SPAC167.06c	1.52474	3.19546	18.9677	1.16561e-07	7.19625e-06	8.56295	131	131	117	386	400	398
SPAC13C5.04	1.10204	5.36852	18.8742	1.20927e-07	7.25446e-06	8.42123	645	673	666	1520	1587	1507
SPAC1B2.06	-1.70289	3.2425	-18.883	1.20506e-07	7.25446e-06	8.53326	414	387	400	143	127	129
SPBC2F12.13	1.04819	7.22829	18.8856	1.20381e-07	7.25446e-06	8.34233	2609	2558	2191	5344	5526	5577
SPAC22A12.11	1.18312	8.28524	18.8207	1.23502e-07	7.27175e-06	8.37794	4806	4882	4879	11566	12770	11557
SPBPB2B2.12c	2.52189	4.28571	18.8431	1.22415e-07	7.27175e-06	8.51589	199	235	147	1104	1269	1201
SPAPJ760.03c	-0.896521	7.8357	-18.6471	1.32311e-07	7.64876e-06	8.25465	7514	7556	6885	4401	4242	4128
SPNCRNA.645	1.10786	5.35679	18.6591	1.31676e-07	7.64876e-06	8.33167	638	665	661	1510	1581	1495
SPAC26F1.14c	1.57985	6.06971	18.4833	1.41275e-07	7.86853e-06	8.21179	903	866	968	2723	3210	2937
SPAC926.08c	-0.955636	7.86282	-18.5032	1.40149e-07	7.86853e-06	8.19604	7846	7904	7093	4446	4160	4145
SPBC1683.05	-1.15641	7.03238	-18.4653	1.42299e-07	7.86853e-06	8.15747	4723	4308	4734	2178	2286	2223
SPBC16D10.08c	2.42221	7.25674	18.5521	1.37428e-07	7.86853e-06	8.24693	1361	1502	1821	8572	8767	9687
SPBC359.04c	-2.7966	3.92774	-18.5161	1.39427e-07	7.86853e-06	8.39394	980	886	959	123	194	131
SPCC1672.12c	0.811393	7.53105	18.3801	1.47274e-07	8.07342e-06	8.12771	3420	3350	3065	6171	6154	6362
SPAC32A11.04c	-1.12687	8.72188	-18.2282	1.56635e-07	8.44104e-06	8.15548	15565	15514	13000	7380	7251	7151
SPCC1020.05	1.01445	6.61396	18.2454	1.55538e-07	8.44104e-06	8.06963	1684	1541	1627	3421	3566	3631
SPAC513.03	1.95434	6.13162	18.186	1.5935e-07	8.50009e-06	8.08989	811	789	912	3619	3847	3094
SPAC6G10.03c	1.00981	7.00605	18.1699	1.60404e-07	8.50009e-06	8.02882	2201	2129	2046	4314	4835	4778
SPAC4A8.04	1.61093	7.40978	18.1197	1.63729e-07	8.56262e-06	8.0322	2191	2209	2456	6917	8076	7715
SPBC1734.01c	-0.984715	7.64839	-18.1116	1.64277e-07	8.56262e-06	8.01262	6922	6815	6153	3837	3496	3550
SPAC23C11.05	-1.86905	9.24345	-18.0475	1.68657e-07	8.71943e-06	8.12287	29805	30150	22376	8764	7792	7656
SPAC56F8.09	-1.0878	6.0259	-17.9816	1.73296e-07	8.88702e-06	7.97572	2312	2270	2107	1232	1103	1078
SPAC27F1.10	2.49899	2.55219	17.925	1.77394e-07	9.02441e-06	8.07412	61	67	46	328	366	371
SPBC23E6.05	-0.972433	7.67044	-17.8938	1.79704e-07	9.06937e-06	7.91617	6832	6969	6300	3903	3527	3669
SPAC22E12.03c	1.1399	6.26732	17.8006	1.86806e-07	9.16086e-06	7.88655	1210	1330	1119	2869	3058	2799
SPAC23C4.13	1.44343	5.93186	17.7804	1.88383e-07	9.16086e-06	7.90818	927	956	736	2497	2706	2485
SPBC146.08c	1.05609	6.73549	17.8172	1.85519e-07	9.16086e-06	7.87574	1849	1748	1610	4188	3777	3767
SPBC25H2.07	-1.47188	8.63459	-17.7876	1.87821e-07	9.16086e-06	7.95781	17264	16442	13213	6427	5872	5903
SPBC428.10	1.02972	6.6336	17.7761	1.8872e-07	9.16086e-06	7.85962	1579	1678	1634	3445	3728	3650
SPCC569.09	1.56317	5.44263	17.709	1.9409e-07	9.35016e-06	7.92348	612	618	551	1785	2142	1795
SPBPB2B2.11	2.47526	4.29496	17.6806	1.96411e-07	9.3908e-06	8.03077	204	242	149	1084	1267	1190
SPAC1039.02	-2.91093	6.89007	-17.5679	2.05951e-07	9.70105e-06	7.81286	9060	8859	5560	1238	1030	1036
SPNCRNA.787	-0.836616	6.4011	-17.5744	2.05388e-07	9.70105e-06	7.77135	2715	2758	2482	1648	1556	1619
SPAC186.02c	5.33641	-0.56219	17.5144	2.10661e-07	9.74184e-06	5.91878	2	2	2	123	104	101
SPAC22E12.02	0.870956	6.70668	17.5101	2.11039e-07	9.74184e-06	7.73477	1844	1909	1688	3558	3715	3502
SPCC191.01	1.81069	5.22835	17.506	2.11413e-07	9.74184e-06	7.86001	418	471	526	1691	1901	1761
SPAC19E9.02	0.842018	7.39017	17.4797	2.1378e-07	9.78005e-06	7.71967	3104	3000	2725	5507	5829	5797
SPCPB16A4.06c	1.94749	3.55975	17.4507	2.16422e-07	9.83022e-06	7.95584	125	146	152	548	619	598
SPBPB2B2.10c	0.922138	4.73334	17.4228	2.19005e-07	9.87696e-06	7.84706	465	460	434	934	925	932
SPAPJ691.02	2.12838	4.25801	17.3413	2.26751e-07	1.00833e-05	7.87763	211	202	231	914	1143	1003
SPNCRNA.1309	-2.07942	2.90903	-17.3482	2.26081e-07	1.00833e-05	7.90351	391	373	324	94	105	80
SPBC660.06	1.35644	7.73564	17.3145	2.29364e-07	1.01287e-05	7.67781	3340	3330	2741	8655	9348	8055
SPBC31E1.04	0.767563	6.64081	17.2583	2.34952e-07	1.03039e-05	7.61915	1832	1801	1749	3213	3344	3373
SPAC15A10.10	1.0134	5.79424	17.1515	2.46006e-07	1.05e-05	7.61836	995	901	856	1908	2090	2019
SPAPJ695.02	2.82701	4.67019	17.1829	2.427e-07	1.05e-05	7.79622	190	296	199	1514	1815	1864
SPBC12C2.07c	-0.878834	8.25969	-17.1652	2.44559e-07	1.05e-05	7.62746	10140	9959	9179	5955	5534	5752
SPBC32C12.02	1.28015	6.39953	17.1513	2.46028e-07	1.05e-05	7.58395	1264	1401	1157	3106	3577	3367
SPCC569.07	-1.30543	5.2957	-17.1101	2.5045e-07	1.06174e-05	7.64856	1492	1364	1493	591	663	652
SPBC26H8.07c	-0.990021	8.88181	-17.0792	2.53822e-07	1.06431e-05	7.65441	16372	15910	14567	8819	8136	8581
SPBC2D10.05	1.16364	5.59792	17.0588	2.56076e-07	1.06431e-05	7.59775	795	810	677	1767	1961	1807
SPNCRNA.1517	-0.868182	8.26782	-17.0661	2.55269e-07	1.06431e-05	7.58167	10168	9978	9190	5997	5589	5816
SPAC1B2.03c	-1.39191	6.42627	-17.0201	2.60425e-07	1.07535e-05	7.51895	3811	3105	2948	1399	1342	1308
SPAC823.03	0.81206	7.24953	16.9461	2.68957e-07	1.10342e-05	7.46604	2831	2801	2464	5070	5105	5202
SPAC29B12.10c	-1.26679	7.59592	-16.874	2.77573e-07	1.13147e-05	7.44958	7899	7010	6308	2926	3267	3328
SPBP35G2.06c	0.763026	6.28241	16.8556	2.79825e-07	1.13338e-05	7.44148	1457	1411	1338	2511	2564	2659
SPAC11E3.06	2.3072	3.92224	16.7306	2.95667e-07	1.18996e-05	7.62853	143	157	181	828	964	785
SPBC11C11.06c	1.85313	7.85329	16.6836	3.01884e-07	1.20734e-05	7.40934	3114	3233	2307	11177	11466	10888
SPAC1006.01	1.46963	7.75105	16.6643	3.04477e-07	1.21011e-05	7.3765	2909	2910	3307	8782	9611	8965
SPAC823.08c	-0.881038	7.24692	-16.6475	3.06756e-07	1.21159e-05	7.32015	4820	4852	4832	2942	2717	2881
SPBC405.01	-0.877032	8.82137	-16.5677	3.17854e-07	1.24767e-05	7.4065	14816	14332	14003	8394	8299	8772
SPAC4A8.05c	1.1683	7.22254	16.4967	3.28104e-07	1.2722e-05	7.25636	2435	2453	2135	5169	6113	5835
SPBC1734.08	0.904146	6.2946	16.5078	3.26487e-07	1.2722e-05	7.27503	1331	1333	1374	2717	2796	2675
SPAC22G7.11c	0.770603	5.95481	16.3857	3.44897e-07	1.32134e-05	7.23286	1154	1137	1052	2103	2080	1996
SPBPB2B2.13	2.12111	6.64154	16.3855	3.44931e-07	1.32134e-05	7.22962	1245	1318	859	4899	5608	5415
SPCC1906.04	2.4912	2.19144	16.3656	3.48041e-07	1.32526e-05	7.40197	52	45	38	256	307	265
SPCC285.04	1.22657	4.81627	16.2811	3.61614e-07	1.36875e-05	7.31059	419	477	402	1124	1127	1037
SPBP22H7.02c	-0.686055	6.87928	-16.2333	3.6955e-07	1.39052e-05	7.11759	3553	3542	3414	2369	2379	2329
SPAC1039.01	-1.22482	5.51022	-16.2022	3.74814e-07	1.39382e-05	7.18931	1652	1548	1707	725	806	743
SPNCRNA.573	1.18791	5.3531	16.2123	3.73091e-07	1.39382e-05	7.21721	678	676	557	1519	1671	1521
SPBC17D1.06	-1.1995	8.46438	-16.1799	3.78652e-07	1.39611e-05	7.18273	12512	12128	13028	6345	5600	5860
SPCC132.04c	1.03138	6.56608	16.1732	3.79818e-07	1.39611e-05	7.10081	1627	1629	1416	3204	3657	3485
SPAC19G12.05	-0.728636	7.40366	-16.1142	3.9019e-07	1.42511e-05	7.05761	5410	5171	4778	3392	3264	3375
SPAC20G4.03c	1.71599	5.23438	16.0346	4.04723e-07	1.42511e-05	7.16073	451	469	547	1582	1863	1763
SPAC227.02c	-0.872029	5.59805	-16.0496	4.01936e-07	1.42511e-05	7.09429	1512	1557	1542	911	925	893
SPAC3F10.16c	-0.790738	7.80975	-16.0962	3.93429e-07	1.42511e-05	7.06698	7039	7046	6687	4498	4153	4365
SPAC4F8.04	-0.854027	7.29662	-16.0599	4.00042e-07	1.42511e-05	7.03056	4961	5200	4724	3133	2903	2887
SPCC1442.07c	0.896249	5.24293	16.0556	4.00829e-07	1.42511e-05	7.1424	674	658	621	1378	1280	1283
SPNCRNA.1304	4.55789	1.59545	16.0297	4.05638e-07	1.42511e-05	6.89766	17	11	15	329	439	357
SPNCRNA.383	2.16459	1.72506	16.0352	4.04621e-07	1.42511e-05	7.19693	37	41	31	181	170	182
SPAC3C7.05c	1.32629	6.07659	15.9735	4.16286e-07	1.45449e-05	7.03344	1118	1049	849	2571	2887	2706
SPNCRNA.1320	0.94514	4.75394	15.8987	4.30974e-07	1.49758e-05	7.12378	443	475	450	949	955	949
SPCC1322.10	1.25387	10.8554	15.8796	4.34801e-07	1.50266e-05	7.22486	27327	29122	27990	69343	75653	73387
SPNCRNA.1316	-0.916987	5.51673	-15.8541	4.39979e-07	1.51234e-05	7.0057	1493	1441	1493	857	867	816
SPNCRNA.1527	3.06714	2.81787	15.8366	4.43599e-07	1.51658e-05	7.22634	71	65	39	494	487	584
SPAC20G8.05c	0.87316	7.89008	15.8037	4.50436e-07	1.53172e-05	6.93613	4128	4225	3984	7860	7930	8721
SPBC1347.13c	-0.923413	5.06888	-15.7694	4.57727e-07	1.54026e-05	7.0148	1150	1122	986	633	618	607
SPBPB21E7.10	5.36229	-0.629933	15.7691	4.57791e-07	1.54026e-05	5.49536	2	3	1	116	101	99
SPAC11E3.12	1.19587	7.79227	15.686	4.75984e-07	1.59304e-05	6.88166	3746	3560	3039	7905	9209	8523
SPAC27D7.03c	2.36635	5.76514	15.6572	4.82458e-07	1.60626e-05	6.94458	489	524	694	2746	3322	3372
SPAC17H9.19c	0.778418	6.36	15.5468	5.08286e-07	1.68343e-05	6.78748	1495	1505	1414	2596	2815	2797
SPBC8E4.04	0.783286	7.64624	15.4935	5.21334e-07	1.7177e-05	6.75603	3562	3804	3391	6795	6707	6542
SPCC1884.01	-1.27168	4.47268	-15.455	5.30962e-07	1.74041e-05	6.93806	845	749	837	366	353	369
SPNCRNA.1133	1.39632	5.15913	15.404	5.44049e-07	1.77416e-05	6.83831	547	583	430	1442	1558	1427
SPCC364.02c	0.707463	5.98812	15.3813	5.49988e-07	1.78437e-05	6.72073	1215	1151	1130	2091	2017	2077
SPBC725.11c	1.0678	6.7042	15.3614	5.55278e-07	1.79239e-05	6.68169	1701	1789	1583	3684	4221	3634
SPAC22F8.05	1.63827	6.28517	15.289	5.7492e-07	1.80989e-05	6.67532	1108	1105	908	3065	4029	3469
SPAC9E9.07c	-0.820953	7.5338	-15.2787	5.77775e-07	1.80989e-05	6.63341	5849	5606	5878	3632	3526	3477
SPBC29A10.09c	1.01043	9.30368	15.329	5.63964e-07	1.80989e-05	6.84081	10970	11044	9414	22170	23005	23218
SPBC902.05c	0.749203	7.98476	15.282	5.76863e-07	1.80989e-05	6.66983	4675	4814	4277	8235	8554	8259
SPBC947.09	1.12662	5.56298	15.2815	5.76996e-07	1.80989e-05	6.72017	750	708	796	1721	1866	1739
SPNCRNA.1185	1.39489	4.59585	15.3122	5.6854e-07	1.80989e-05	6.85801	333	395	324	920	1046	1028
SPBC725.10	1.62146	6.44405	15.2446	5.87364e-07	1.83091e-05	6.64079	1181	1336	998	3819	4362	3516
SPCC126.03	-0.711545	6.84345	-15.2263	5.92594e-07	1.83601e-05	6.60178	3477	3460	3404	2345	2221	2278
SPCC1620.05	-0.709929	7.64061	-15.2187	5.94775e-07	1.83601e-05	6.60332	5974	6093	5892	3997	4036	3868
SPCC584.01c	-0.821284	7.95629	-15.2085	5.97708e-07	1.83615e-05	6.62317	8258	7787	7226	4509	4816	4930
SPAC4H3.04c	1.48517	3.48022	15.1038	6.28862e-07	1.90426e-05	6.86744	160	174	136	481	499	445
SPAPB1E7.05	1.10087	6.37782	15.1116	6.26502e-07	1.90426e-05	6.56268	1421	1394	1191	2848	3128	3332
SPBC1198.01	0.905547	4.79769	15.1136	6.25892e-07	1.90426e-05	6.71671	462	503	465	967	972	962
SPNCRNA.995	1.4819	3.482	14.9697	6.71526e-07	2.02381e-05	6.79941	172	150	148	445	462	519
SPBC32H8.09	0.748375	5.2384	14.9114	6.91074e-07	2.0729e-05	6.54908	705	677	667	1217	1263	1250
SPBC11G11.03	-0.815249	8.19286	-14.8791	7.02172e-07	2.0963e-05	6.47216	9329	9565	8463	5843	5593	5392
SPAC19G12.09	2.19809	7.42129	14.8668	7.06446e-07	2.0992e-05	6.47117	2058	2249	1426	8879	10262	8935
SPAC19A8.16	2.37287	3.57655	14.7529	7.47531e-07	2.21095e-05	6.69828	155	124	95	786	654	642
SPBPB10D8.02c	-2.93412	6.30605	-14.7339	7.54644e-07	2.22166e-05	6.42548	5728	4868	4846	530	1043	695
SPBC31F10.17c	0.7643	6.47084	14.7017	7.6686e-07	2.24722e-05	6.33269	1697	1655	1447	3002	2936	2879
SPBC216.02	1.30934	5.18907	14.6869	7.72538e-07	2.25347e-05	6.45221	532	500	604	1508	1464	1404
SPAC513.07	1.20082	7.52496	14.6368	7.92205e-07	2.29149e-05	6.30622	2834	2635	3098	7018	7193	7083
SPBC776.16	1.01671	6.09336	14.6353	7.92779e-07	2.29149e-05	6.31981	1138	1217	1029	2566	2282	2570
SPAC1006.07	-1.13536	11.1536	-14.5832	8.138e-07	2.30228e-05	6.58545	82380	81940	73630	41237	38326	37725
SPAC1687.14c	0.991222	4.78098	14.5813	8.14612e-07	2.30228e-05	6.4369	505	441	428	959	1030	968
SPBP8B7.24c	0.971257	6.28971	14.5842	8.1342e-07	2.30228e-05	6.27885	1404	1342	1193	2746	3005	2617
SPCC74.09	1.75047	5.01442	14.5818	8.1441e-07	2.30228e-05	6.43337	413	363	471	1352	1559	1617
SPNCRNA.61	4.02543	-0.48926	14.5814	8.14553e-07	2.30228e-05	5.55401	4	4	3	64	82	73
SPAC139.05	0.987312	4.91075	14.5348	8.33939e-07	2.34647e-05	6.39391	509	519	475	1080	1008	1145
SPCC417.16	1.18644	7.85601	14.5116	8.43742e-07	2.36359e-05	6.26084	3474	3460	3889	8942	9141	8579
SPBC4F6.13c	-0.775958	8.20271	-14.468	8.62606e-07	2.40584e-05	6.24727	9097	9056	8971	5606	5574	6003
SPBC1D7.05	0.786403	5.71555	14.4488	8.7103e-07	2.40821e-05	6.2439	952	908	956	1753	1736	1771
SPCC306.08c	1.02915	8.55739	14.4532	8.69108e-07	2.40821e-05	6.29208	6336	6734	5551	13312	14424	13327
SPBC29A10.08	0.994263	9.56576	14.4352	8.7708e-07	2.41444e-05	6.39222	13177	13366	11356	26233	27361	27982
SPCC31H12.05c	-0.839651	6.59853	-14.4182	8.84693e-07	2.42198e-05	6.16993	3045	2949	3131	1894	1803	1827
SPNCRNA.802	1.84706	3.43215	14.4121	8.87439e-07	2.42198e-05	6.5212	144	148	110	510	581	476
SPAC15A10.05c	1.09405	5.04778	14.4026	8.91776e-07	2.42342e-05	6.3065	506	566	522	1194	1319	1175
SPAC186.07c	3.7977	1.17611	14.3593	9.11677e-07	2.43586e-05	6.21846	12	12	18	181	228	235
SPAC19G12.16c	1.37684	10.1494	14.3618	9.10532e-07	2.43586e-05	6.40439	17502	17760	14551	41775	47572	50622
SPAC869.09	4.27408	-0.553016	14.3614	9.10713e-07	2.43586e-05	5.40668	2	5	3	75	76	76
SPBC3H7.07c	-0.813105	6.26083	-14.3691	9.07102e-07	2.43586e-05	6.15506	2478	2553	2141	1489	1454	1468
SPNCRNA.421	1.95371	3.70865	14.3212	9.29603e-07	2.47337e-05	6.45098	177	170	124	662	723	586
SPCPB16A4.04c	-0.712393	6.31465	-14.286	9.46564e-07	2.508e-05	6.10506	2450	2407	2314	1663	1530	1551
SPNCRNA.1287	1.55501	3.72307	14.2488	9.6481e-07	2.54574e-05	6.40152	188	203	153	528	621	581
SPACUNK4.19	1.73827	2.49694	14.2255	9.76437e-07	2.56577e-05	6.46176	76	79	62	240	278	269
SPAC1486.09	-0.718342	7.53174	-14.1993	9.89738e-07	2.59002e-05	6.04052	5455	5768	5483	3771	3614	3619
SPAC18G6.01c	1.05499	4.93844	14.1787	1.00033e-06	2.607e-05	6.19498	496	483	518	1119	1189	1063
SPAC22E12.13c	-0.908679	7.61768	-14.1433	1.01882e-06	2.64435e-05	6.01701	6236	6209	6490	3859	3475	3610
SPAC11G7.03	0.712959	7.73184	14.0834	1.05098e-06	2.68316e-05	5.99052	4036	4113	3558	6917	6832	7007
SPAC27D7.12c	0.934557	4.49369	14.0895	1.04769e-06	2.68316e-05	6.20504	399	381	366	771	765	840
SPBPB21E7.02c	3.82813	0.443619	14.0703	1.0582e-06	2.68316e-05	5.84565	9	8	7	117	156	120
SPCC191.11	0.822985	6.23321	14.0857	1.04977e-06	2.68316e-05	5.99947	1283	1368	1330	2438	2556	2638
SPCC306.11	1.01003	8.51477	14.1058	1.03886e-06	2.68316e-05	6.09254	6709	6133	5375	12650	13520	13420
SPNCRNA.560	0.902097	4.04073	14.0687	1.05909e-06	2.68316e-05	6.25438	284	283	279	567	578	569
SPBC244.02c	-0.701519	6.96078	-14.057	1.06554e-06	2.68879e-05	5.95516	3917	3776	3497	2525	2361	2567
SPBC1271.08c	0.693769	6.60009	14.0276	1.08204e-06	2.70892e-05	5.94937	1905	1748	1719	3089	3247	3075
SPCPJ732.02c	0.815114	6.86313	14.0302	1.08055e-06	2.70892e-05	5.94416	2029	2060	2087	3882	4126	3774
SPAC13G7.04c	0.912722	7.82511	14.002	1.0966e-06	2.73462e-05	5.95875	4090	4107	3468	7420	8151	8182
SPAC12G12.13c	-0.577076	7.26339	-13.9527	1.12527e-06	2.74807e-05	5.89217	4581	4410	4221	3213	3222	3157
SPAC1486.01	1.1721	8.49672	13.9671	1.11679e-06	2.74807e-05	6.0154	6139	6035	4858	13626	14529	13216
SPAC6F12.12	0.811818	7.48511	13.9482	1.12792e-06	2.74807e-05	5.90313	3187	3058	3274	5912	6058	6133
SPCC550.15c	-0.716584	7.90606	-13.9831	1.10746e-06	2.74807e-05	5.9396	7436	7444	6780	4968	4558	4750
SPNCRNA.1609	1.94531	3.75555	13.9733	1.11318e-06	2.74807e-05	6.25716	185	178	126	687	739	604
SPNCRNA.928	0.880723	5.48702	13.9554	1.12367e-06	2.74807e-05	5.99362	846	761	722	1475	1631	1539
SPBC29A3.16	-0.684068	6.95625	-13.9279	1.14001e-06	2.76691e-05	5.88086	3688	3767	3622	2520	2562	2391
SPBC713.04c	-0.606322	7.6634	-13.9108	1.15033e-06	2.78134e-05	5.87804	6086	5829	5693	4207	4085	4239
SPAC513.02	2.09119	4.11824	13.8607	1.18108e-06	2.82465e-05	6.15784	238	229	139	881	968	892
SPAC8E11.10	-1.23772	8.41859	-13.86	1.18156e-06	2.82465e-05	5.94112	12494	12703	11799	6190	4993	5879
SPAPB1E7.04c	1.3916	8.9165	13.8705	1.17504e-06	2.82465e-05	6.00787	7611	7525	5993	17835	20391	21620
SPAC589.07c	0.895255	4.58017	13.8231	1.20484e-06	2.86951e-05	6.04102	426	392	416	847	827	812
SPBPB2B2.06c	1.23673	5.44994	13.7988	1.22042e-06	2.89576e-05	5.92111	728	651	627	1516	1860	1760
SPAC31A2.07c	-0.615621	6.66139	-13.7802	1.23251e-06	2.90439e-05	5.80185	2964	3030	2826	2122	2029	2085
SPBC1271.03c	0.660565	6.43513	13.7792	1.23319e-06	2.90439e-05	5.81125	1616	1695	1535	2690	2821	2786
SPAC24B11.11c	0.620768	6.96574	13.7697	1.2394e-06	2.90824e-05	5.78958	2401	2435	2260	3812	3964	4047
SPAC26F1.11	2.984	4.49864	13.7451	1.25573e-06	2.93572e-05	6.08539	187	260	136	1526	1949	1426
SPNCRNA.629	0.865041	5.66298	13.7141	1.27661e-06	2.97362e-05	5.83348	925	924	797	1803	1780	1637
SPAC6F12.03c	0.615291	5.65115	13.6849	1.29667e-06	3.00932e-05	5.81025	977	962	918	1584	1597	1561
SPAC13F5.07c	1.89094	3.48061	13.6757	1.30312e-06	3.01328e-05	6.11858	144	155	111	533	619	495
SPBC32C12.03c	-0.80631	6.50195	-13.6574	1.31592e-06	3.03186e-05	5.73651	2894	2720	2822	1831	1649	1750
SPNCRNA.583	1.12021	3.62807	13.6404	1.32795e-06	3.04853e-05	6.06702	194	204	191	439	492	459
SPBC215.11c	1.2132	6.43895	13.6263	1.33805e-06	3.06067e-05	5.7291	1306	1564	1167	3333	3507	3241
SPBC1778.01c	-0.783896	9.18179	-13.5924	1.36259e-06	3.10563e-05	5.87573	17929	18539	17183	11473	10850	11442
SPAC1F7.05	0.996539	9.86637	13.5792	1.37235e-06	3.1167e-05	5.93928	16661	16243	13779	32848	33414	34265
SPBC1773.03c	0.749612	5.65148	13.5632	1.3842e-06	3.13242e-05	5.74241	943	885	900	1618	1734	1619
SPNCRNA.889	-1.11052	5.33315	-13.5563	1.38934e-06	3.13291e-05	5.78043	1468	1509	1209	734	650	710
SPAC31G5.18c	0.621556	5.86719	13.5215	1.41568e-06	3.18103e-05	5.69316	1120	1106	1085	1845	1808	1867
SPNCRNA.996	1.49352	3.33305	13.5122	1.4228e-06	3.18576e-05	6.03241	161	133	129	400	419	473
SPAC926.09c	-1.02019	9.63514	-13.4958	1.43548e-06	3.20288e-05	5.86809	26241	25951	27500	13589	13989	15058
SPAC1002.12c	0.778329	6.54823	13.4616	1.46232e-06	3.25135e-05	5.62068	1674	1741	1615	2917	3290	3150
SPBC1711.04	-0.70084	7.17368	-13.4426	1.47752e-06	3.2737e-05	5.59339	4556	4517	3911	2948	2816	2872
SPCC1494.07	-0.68371	7.40553	-13.4237	1.49279e-06	3.29606e-05	5.58411	5160	4982	4980	3232	3469	3507
SPBC25B2.09c	-0.748437	8.89456	-13.4072	1.50627e-06	3.31431e-05	5.73076	14587	14437	14378	9514	9033	9467
SPAC694.04c	-0.592907	6.38711	-13.3982	1.51366e-06	3.3191e-05	5.58498	2463	2468	2305	1740	1770	1687
SPAC1751.01c	1.05411	6.48458	13.3911	1.51953e-06	3.32051e-05	5.58434	1459	1391	1526	3199	3075	3584
SPBC1711.12	0.588671	7.65146	13.3416	1.56114e-06	3.39976e-05	5.54673	3938	3977	3631	6205	6181	6419
SPAC1B3.20	1.13822	4.34018	13.2954	1.60115e-06	3.47498e-05	5.77555	346	344	274	802	766	726
SPBC16D10.02	-0.692187	6.99881	-13.2685	1.62501e-06	3.51477e-05	5.48988	3761	3850	3829	2633	2558	2483
SPAC806.07	0.797534	5.99866	13.2458	1.64538e-06	3.53479e-05	5.52055	1198	1183	1037	2238	2178	2019
SPBC4F6.14	-0.736355	8.33732	-13.2486	1.64293e-06	3.53479e-05	5.55772	9454	10110	9814	6414	6318	6384
SPAC15A10.09c	1.29073	6.76283	13.2328	1.65721e-06	3.53789e-05	5.48266	1846	1760	1327	4079	4451	4438
SPCC4E9.01c	1.03673	4.5155	13.232	1.65795e-06	3.53789e-05	5.70908	345	388	392	826	837	832
SPAC19G12.15c	0.673043	8.6769	13.218	1.67084e-06	3.54162e-05	5.58872	7795	7604	7412	12914	12937	13574
SPAPB1A11.01	1.82361	2.55316	13.221	1.66803e-06	3.54162e-05	5.9269	80	81	59	261	310	273
SPAC29A4.17c	1.41809	4.66339	13.1971	1.6902e-06	3.57076e-05	5.67745	393	420	289	1029	1111	1024
SPAC1142.04	-0.739647	8.16418	-13.1806	1.70573e-06	3.57561e-05	5.49413	8681	8576	8820	5661	5450	5830
SPAP11E10.01	-0.657311	6.2721	-13.1767	1.70936e-06	3.57561e-05	5.4567	2362	2300	2171	1647	1526	1522
SPCC569.08c	-0.617172	7.24827	-13.1776	1.70851e-06	3.57561e-05	5.43249	4505	4395	4351	3109	3027	3228
SPAC22H12.01c	1.50045	6.20099	13.1708	1.715e-06	3.57564e-05	5.47962	1130	1195	796	3157	3132	3157
SPACUNK4.11c	-0.809383	4.9191	-13.1508	1.73413e-06	3.59262e-05	5.58891	966	987	868	594	598	551
SPNCRNA.293	-2.47821	1.62981	-13.1504	1.73445e-06	3.59262e-05	5.85565	168	169	176	28	45	28
SPAC11E3.13c	1.36481	7.5498	13.1349	1.74944e-06	3.60021e-05	5.44449	3070	2938	2276	6969	8398	7634
SPBC800.14c	1.49153	5.15128	13.1383	1.74613e-06	3.60021e-05	5.57784	563	546	397	1601	1578	1380
SPBC365.04c	-0.818097	6.74928	-13.1266	1.75751e-06	3.60516e-05	5.4098	3375	3307	3370	2144	2132	1910
SPAC20H4.11c	1.26332	4.91227	13.0953	1.78837e-06	3.63826e-05	5.57438	443	417	513	1222	1208	1125
SPAC23H4.15	-0.72892	7.686	-13.0871	1.79653e-06	3.63826e-05	5.39109	6364	6115	6177	4197	3829	4184
SPAC328.02	0.743094	6.14919	13.0897	1.79395e-06	3.63826e-05	5.41387	1261	1277	1323	2284	2356	2360
SPNCRNA.828	1.50897	3.08836	13.1016	1.78215e-06	3.63826e-05	5.82113	129	115	110	358	332	407
SPCC1450.12	0.711849	6.98853	13.0391	1.84536e-06	3.72529e-05	5.35142	2471	2435	2094	3999	4212	4186
SPNCRNA.1644	-0.664076	5.68362	-13.0113	1.8742e-06	3.77153e-05	5.39802	1558	1574	1424	1077	1000	1037
SPBC19C7.04c	2.41363	4.85987	12.9968	1.88952e-06	3.79036e-05	5.57546	330	314	246	1381	2080	1726
SPBC1711.07	-0.764893	7.79454	-12.9747	1.91315e-06	3.8257e-05	5.3302	7103	7297	6042	4416	4261	4308
SPAPB24D3.01	-0.657344	6.9175	-12.9596	1.92939e-06	3.84608e-05	5.30174	3568	3528	3587	2483	2373	2485
SPAC16E8.06c	-0.629662	7.15668	-12.9284	1.96354e-06	3.89759e-05	5.27933	4414	4253	3843	2977	2950	2822
SPAC17H9.05	-0.642832	8.12925	-12.9249	1.96749e-06	3.89759e-05	5.33034	8279	8571	7790	5892	5572	5628
SPNCRNA.1042	-0.622094	6.21901	-12.8558	2.04567e-06	4.03989e-05	5.26118	2209	2197	2098	1596	1493	1491
SPAC20G8.03	0.836539	9.08886	12.8355	2.0694e-06	4.06152e-05	5.40984	9684	9426	9559	17436	19559	18574
SPAC8F11.04	-0.639814	8.44096	-12.8383	2.06609e-06	4.06152e-05	5.31927	10143	10298	10080	7100	7152	6985
SPCC737.07c	-0.534784	6.48983	-12.8105	2.09901e-06	4.1052e-05	5.22043	2594	2551	2468	1902	1891	1900
SPNCRNA.1061	0.777342	4.8846	12.8058	2.10457e-06	4.1052e-05	5.38706	563	521	504	935	1013	1002
SPAC13C5.05c	0.539625	6.84811	12.7854	2.12909e-06	4.14033e-05	5.19523	2309	2258	2159	3467	3604	3522
SPAC18B11.06	-0.657276	6.66368	-12.7793	2.13658e-06	4.14223e-05	5.19592	3153	3081	2741	2133	2028	1997
SPAP8A3.09c	-0.596805	7.43951	-12.7615	2.15834e-06	4.15765e-05	5.17672	5201	5219	4626	3615	3639	3510
SPBC56F2.06	2.4075	3.71322	12.7568	2.16415e-06	4.15765e-05	5.5759	147	161	99	655	892	778
SPBP26C9.02c	0.855409	6.34726	12.7618	2.15796e-06	4.15765e-05	5.20143	1499	1530	1246	2768	2907	2682
SPBC800.08	-0.692489	6.29799	-12.7478	2.1752e-06	4.16629e-05	5.19024	2398	2410	2234	1649	1476	1599
SPBC106.11c	0.640594	6.83216	12.7145	2.21704e-06	4.23367e-05	5.1516	2195	2199	2031	3565	3476	3816
SPAC1705.03c	1.11625	11.5867	12.6954	2.24131e-06	4.25447e-05	5.54729	52894	51389	43339	112299	117637	115377
SPNCRNA.385	3.01785	0.34493	12.6956	2.24105e-06	4.25447e-05	5.32364	10	14	7	98	86	91
SPAC824.07	0.673217	7.0641	12.6751	2.26757e-06	4.27879e-05	5.12318	2530	2447	2480	4425	4380	4088
SPBPB21E7.09	-0.79313	4.78768	-12.6764	2.26597e-06	4.27879e-05	5.31775	854	865	839	501	541	558
SPNCRNA.940	2.76882	0.655624	12.6663	2.27914e-06	4.28788e-05	5.4143	15	10	17	98	109	105
SPCC18B5.01c	-0.822447	7.9701	-12.6588	2.28893e-06	4.2936e-05	5.15052	8267	7731	7488	4468	4743	5195
SPCC417.15	1.50009	4.86358	12.65	2.30054e-06	4.29949e-05	5.31667	417	343	468	1271	1303	1159
SPNCRNA.1116	0.706449	6.08863	12.6462	2.30559e-06	4.29949e-05	5.14087	1215	1343	1195	2171	2258	2200
SPAC1952.02	-0.600695	6.62746	-12.6293	2.32807e-06	4.32871e-05	5.102	2961	2780	2829	2068	2004	2050
SPAC57A10.10c	-0.720141	8.62631	-12.5867	2.38597e-06	4.42343e-05	5.18989	12162	12693	10916	8058	7702	7719
SPNCRNA.32	1.47466	5.42549	12.5813	2.3934e-06	4.42431e-05	5.19749	610	517	702	1853	1912	1698
SPNCRNA.993	2.00897	1.59997	12.5697	2.40951e-06	4.44118e-05	5.54904	33	37	35	150	174	140
SPBC3D6.12	-0.59118	8.02396	-12.5553	2.42966e-06	4.46162e-05	5.08414	7794	7711	7005	5477	5231	5465
SPCC330.07c	-1.24698	5.81465	-12.5517	2.43463e-06	4.46162e-05	5.11336	1940	1897	2287	927	925	932
SPAC1565.05	-0.596638	7.34271	-12.5299	2.46566e-06	4.47976e-05	5.02819	4861	4669	4522	3305	3252	3514
SPAC823.16c	0.673166	5.61518	12.5338	2.46004e-06	4.47976e-05	5.1129	969	943	824	1556	1604	1561
SPBC32F12.16	1.0939	4.56017	12.5386	2.45321e-06	4.47976e-05	5.27923	407	421	315	872	897	861
SPCC962.03c	-0.843581	6.99787	-12.523	2.47553e-06	4.48488e-05	5.02623	3935	3862	4262	2410	2416	2449
SPNCRNA.1067	1.9574	1.88497	12.515	2.48705e-06	4.49294e-05	5.53335	44	39	48	170	207	178
SPCC1529.01	-0.589799	5.33399	-12.4909	2.52203e-06	4.54322e-05	5.1128	1189	1167	1126	841	842	823
SPSNORNA.15	2.23569	0.804025	12.4693	2.55396e-06	4.58775e-05	5.38067	22	20	14	96	94	98
SPAC3G6.04	-0.632913	6.60978	-12.4601	2.56769e-06	4.59942e-05	4.99468	2862	2826	2870	2051	1951	1979
SPBC1347.02	-0.768442	9.44623	-12.4327	2.60902e-06	4.66033e-05	5.20045	22354	22019	19801	14168	13214	13391
SPBC4F6.07c	-0.713867	6.92954	-12.4201	2.62828e-06	4.67017e-05	4.96061	3654	3716	3616	2528	2259	2479
SPNCRNA.248	1.42677	2.23717	12.4195	2.62922e-06	4.67017e-05	5.47619	70	65	66	186	190	213
SPAC1B9.03c	-0.566442	7.79816	-12.384	2.68443e-06	4.69574e-05	4.95166	6470	6375	6216	4769	4520	4663
SPAC6G9.02c	-0.796532	8.00904	-12.3818	2.68792e-06	4.69574e-05	4.97685	8055	7520	8326	5008	4857	5050
SPBC1604.01	0.818832	5.75763	12.395	2.66715e-06	4.69574e-05	5.01265	975	951	940	1760	1989	1739
SPBC4F6.09	-0.814692	8.00542	-12.3939	2.66888e-06	4.69574e-05	4.98496	8310	8668	7101	4716	5144	4918
SPBC947.15c	0.801558	8.06615	12.3907	2.67388e-06	4.69574e-05	4.99744	5074	4922	4324	8342	9449	9229
SPNCRNA.1366	1.21392	5.07132	12.3881	2.67792e-06	4.69574e-05	5.10987	471	513	575	1214	1335	1355
SPNCRNA.1186	1.40047	2.95435	12.371	2.70501e-06	4.71264e-05	5.39776	109	106	120	316	297	347
SPBC359.01	-0.810188	5.49404	-12.3411	2.75281e-06	4.78282e-05	5.00094	1515	1359	1331	814	927	857
SPNCRNA.780	1.00499	3.69018	12.3273	2.77531e-06	4.80878e-05	5.27459	220	215	205	463	496	436
SPAC4D7.08c	-0.670234	9.01863	-12.3115	2.8013e-06	4.8275e-05	5.07038	15391	15565	15084	10448	10229	10687
SPCC1739.05	-0.746237	6.07554	-12.3148	2.7958e-06	4.8275e-05	4.92633	2102	2191	1866	1398	1287	1288
SPAC18G6.07c	-0.530877	7.68235	-12.2926	2.83266e-06	4.85523e-05	4.88429	5866	5989	5529	4400	4345	4287
SPBC2F12.05c	0.872753	7.87792	12.2957	2.82738e-06	4.85523e-05	4.91957	4332	4315	3626	7488	8527	8297
SPBC146.14c	-0.707304	8.6213	-12.2753	2.86177e-06	4.89194e-05	4.98958	11779	11767	11854	7662	7674	8184
SPCC613.07	-0.754502	5.31952	-12.248	2.90818e-06	4.95795e-05	4.96212	1253	1244	1154	836	782	729
SPBP19A11.02c	0.665196	6.76263	12.2203	2.95642e-06	5.0267e-05	4.8361	2054	2184	1843	3413	3493	3522
SPNCRNA.1093	3.94969	-0.515142	12.2085	2.97725e-06	5.036e-05	4.70497	2	6	4	71	68	69
SPNCRNA.920	1.25775	4.04094	12.2082	2.97773e-06	5.036e-05	5.15484	287	256	210	609	700	636
SPBC1711.16	-0.690124	7.11618	-12.1825	3.02345e-06	5.09976e-05	4.80332	4123	4045	4234	2865	2694	2772
SPBC609.03	0.59964	6.4571	12.1573	3.06914e-06	5.16313e-05	4.80489	1677	1656	1689	2726	2782	2738
SPBC30B4.07c	-0.57693	5.56552	-12.1427	3.09598e-06	5.19454e-05	4.85716	1392	1353	1325	968	1011	977
SPBC409.15	-0.69622	6.78737	-12.1208	3.13688e-06	5.24932e-05	4.76846	3372	3397	3131	2377	2125	2124
SPBC30D10.14	1.90673	6.71485	12.1096	3.15782e-06	5.2567e-05	4.79057	1484	1521	909	5124	5459	4957
SPNCRNA.1607	1.26218	2.76154	12.1129	3.15168e-06	5.2567e-05	5.25475	117	94	97	276	266	258
SPAC3C7.13c	0.543665	7.32126	12.092	3.19134e-06	5.29863e-05	4.7457	3209	3239	2885	4868	4977	4880
SPBC13G1.04c	-0.673417	5.12332	-12.0808	3.21274e-06	5.30644e-05	4.88027	1056	1059	983	709	730	666
SPCC1827.05c	-0.683153	7.59837	-12.0833	3.20791e-06	5.30644e-05	4.74596	5845	6194	5280	4010	3736	3920
SPAC56E4.04c	-0.95726	9.54671	-12.0727	3.22849e-06	5.31864e-05	4.98025	24220	23342	25810	13059	13567	14355
SPAC694.03	-0.525578	6.56973	-12.0552	3.26253e-06	5.35585e-05	4.7308	2755	2763	2509	2041	2007	1989
SPBP8B7.32	0.761783	8.21687	12.0524	3.26792e-06	5.35585e-05	4.79315	5371	5763	4974	9324	9852	10397
SPNCRNA.648	1.0348	4.28283	12.0479	3.27679e-06	5.35658e-05	5.00846	323	353	283	756	670	701
SPBC36.07	-0.564334	6.85998	-12.0324	3.30752e-06	5.39295e-05	4.70754	3366	3346	3229	2368	2384	2535
SPAC29A4.22	3.00004	-0.785665	11.9948	3.38335e-06	5.41241e-05	4.6156	4	5	4	39	39	46
SPAC6B12.03c	2.11102	0.563116	12.01	3.35241e-06	5.41241e-05	5.10112	18	18	13	78	79	76
SPBC16A3.10	0.52486	6.49237	12.012	3.34845e-06	5.41241e-05	4.70663	1810	1783	1690	2751	2807	2678
SPBC27B12.13	-0.587812	8.39788	-12.0077	3.35719e-06	5.41241e-05	4.77848	9989	9983	9154	6930	6838	7217
SPBC337.06c	0.662166	6.39209	12.0015	3.36967e-06	5.41241e-05	4.70512	1597	1679	1431	2680	2769	2610
SPNCRNA.1327	1.32528	3.01529	11.9927	3.38755e-06	5.41241e-05	5.1548	127	136	98	321	337	318
SPNCRNA.1435	1.1367	2.98598	12.0074	3.35766e-06	5.41241e-05	5.1636	120	133	122	281	311	303
SPNCRNA.1692	0.623729	5.09584	11.9973	3.37811e-06	5.41241e-05	4.83346	664	640	634	1061	1069	1106
SPAC869.06c	7.73714	-0.910488	11.9717	3.43072e-06	5.45817e-05	3.72664	0	0	2	219	210	166
SPNCRNA.1668	2.24114	3.52567	11.9705	3.43335e-06	5.45817e-05	5.10534	138	150	91	540	723	663
SPCC330.04c	1.05383	4.7605	11.9605	3.45406e-06	5.4774e-05	4.87325	456	487	385	985	1072	927
SPAC32A11.02c	1.49434	6.70602	11.9325	3.51314e-06	5.55722e-05	4.65957	1664	1646	1131	4251	4260	4889
SPAC890.05	-0.585386	6.34579	-11.9204	3.53912e-06	5.58443e-05	4.64994	2375	2354	2282	1766	1638	1661
SPAC343.04c	0.64013	6.70729	11.9142	3.55249e-06	5.59165e-05	4.63474	1974	1911	2006	3376	3299	3272
SPAC1250.04c	-0.97223	3.71055	-11.9029	3.57682e-06	5.59816e-05	4.99576	466	411	414	248	240	224
SPAC16.03c	-0.615807	6.40496	-11.896	3.59184e-06	5.59816e-05	4.63134	2492	2409	2481	1736	1696	1788
SPAC27E2.03c	-0.689826	9.25753	-11.9019	3.57907e-06	5.59816e-05	4.83379	19268	18823	16729	12203	12447	12096
SPBPJ4664.02	-0.746268	5.77133	-11.8977	3.58826e-06	5.59816e-05	4.67622	1745	1556	1682	1062	1051	1102
SPAC19D5.03	0.534091	5.84876	11.8741	3.64013e-06	5.63034e-05	4.65336	1157	1114	1099	1774	1764	1749
SPAC1F7.02c	-0.702426	8.26653	-11.8801	3.62668e-06	5.63034e-05	4.67649	9066	9204	9365	6380	5919	6126
SPAC1F8.06	1.54035	6.21454	11.8349	3.72801e-06	5.63034e-05	4.62461	1040	1207	846	3396	2758	3569
SPAC227.06	0.565593	6.99632	11.8401	3.71622e-06	5.63034e-05	4.57708	2634	2508	2257	3902	3958	3985
SPAC22F3.08c	-0.656473	6.10699	-11.8754	3.63724e-06	5.63034e-05	4.63319	2211	2063	1832	1401	1384	1401
SPAC458.04c	1.21818	2.92015	11.8479	3.69859e-06	5.63034e-05	5.07113	127	126	97	297	288	295
SPAC4F10.02	0.513405	6.45464	11.853	3.68724e-06	5.63034e-05	4.60152	1732	1756	1678	2656	2688	2646
SPBC1683.09c	-1.3431	4.13667	-11.8635	3.66359e-06	5.63034e-05	4.91297	596	718	663	251	305	287
SPBC1685.14c	0.853277	6.00455	11.8424	3.71116e-06	5.63034e-05	4.62539	1180	1171	1016	2027	2386	2183
SPBC1709.11c	0.572843	6.21552	11.8312	3.73644e-06	5.63034e-05	4.59857	1511	1472	1311	2292	2271	2349
SPBC887.17	-0.916381	7.34034	-11.8617	3.6676e-06	5.63034e-05	4.59507	5379	4827	5482	2963	2843	3201
SPCC1235.01	1.60297	10.0599	11.836	3.72553e-06	5.63034e-05	4.88422	15670	15724	12058	38948	51788	52345
SPNCRNA.29	3.3785	3.30023	11.8562	3.68e-06	5.63034e-05	5.10106	79	77	59	725	1067	682
SPNCRNA.607	1.50794	6.09366	11.8391	3.71848e-06	5.63034e-05	4.63751	975	1102	795	3097	2494	3254
SPAC25A8.02	0.686509	6.24467	11.7842	3.84569e-06	5.74055e-05	4.56651	1379	1411	1416	2319	2535	2485
SPAC25G10.08	-0.761974	9.93967	-11.7881	3.83643e-06	5.74055e-05	4.83385	30271	30180	29542	19505	18367	19674
SPAC4G9.22	0.859144	5.26348	11.7853	3.84289e-06	5.74055e-05	4.67408	682	645	680	1218	1400	1331
SPCC576.06c	0.617408	5.77064	11.7946	3.82104e-06	5.74055e-05	4.60943	1081	1062	961	1695	1665	1799
SPAC13G7.08c	-0.601534	7.42481	-11.7661	3.88855e-06	5.76225e-05	4.52611	5115	5133	4661	3729	3508	3407
SPAC23D3.04c	-0.589103	8.30329	-11.7684	3.88303e-06	5.76225e-05	4.60396	9508	9467	8346	6476	6506	6655
SPAC8F11.10c	-0.604098	8.55946	-11.7365	3.95991e-06	5.76225e-05	4.62228	10979	11157	10600	7504	7896	7946
SPBC1271.09	1.88979	5.19021	11.7426	3.94505e-06	5.76225e-05	4.701	403	396	553	1527	1923	1930
SPBC1773.05c	0.695928	5.82135	11.7739	3.86996e-06	5.76225e-05	4.59235	1030	1050	1046	1847	1908	1735
SPBC211.07c	0.796935	6.08262	11.7397	3.95216e-06	5.76225e-05	4.54862	1285	1283	1062	2333	2143	2343
SPBC21C3.18	-0.663877	5.22108	-11.7577	3.90863e-06	5.76225e-05	4.64969	1106	1137	1061	794	728	738
SPCC1672.07	-0.592306	7.79167	-11.7533	3.91926e-06	5.76225e-05	4.53364	6226	6653	6272	4578	4524	4662
SPCC1672.08c	0.530031	6.81235	11.7574	3.90926e-06	5.76225e-05	4.52492	2208	2195	2178	3390	3470	3438
SPCC1840.07c	-0.553078	6.14626	-11.7386	3.95479e-06	5.76225e-05	4.53733	2094	2026	1920	1449	1461	1550
SPNCRNA.1190	1.08133	2.87662	11.7427	3.94486e-06	5.76225e-05	5.00575	119	122	113	286	271	257
SPCC1827.01c	-0.616583	7.09516	-11.728	3.98056e-06	5.77908e-05	4.49892	4002	3908	4004	2804	2711	2908
SPAC29A4.11	1.43994	4.09113	11.7165	4.00898e-06	5.80708e-05	4.83134	222	228	282	649	756	736
SPBC26H8.12	0.580058	7.03489	11.7088	4.0281e-06	5.82152e-05	4.48744	2487	2525	2535	4115	4083	4028
SPAC144.10c	0.633606	6.74795	11.705	4.03762e-06	5.82204e-05	4.49186	2135	1951	1990	3281	3559	3374
SPAC13G6.11c	-0.620558	6.95884	-11.6934	4.06648e-06	5.83718e-05	4.47737	3723	3688	3449	2639	2388	2631
SPAC4F10.06	-0.522636	7.15186	-11.6963	4.05917e-06	5.83718e-05	4.4763	4206	4033	3767	3089	2938	3022
SPBC651.01c	-0.758652	9.04727	-11.6883	4.07932e-06	5.84243e-05	4.66307	16436	16515	15496	10927	9677	10453
SPBC18H10.05	1.30344	5.56032	11.672	4.12057e-06	5.87504e-05	4.57613	671	633	825	1776	1903	1971
SPNCRNA.1334	1.07981	3.79243	11.6753	4.11214e-06	5.87504e-05	4.84024	251	224	197	531	475	532
SPBC12D12.01	0.707596	7.4267	11.6661	4.13573e-06	5.88348e-05	4.46529	3121	3308	3050	5269	5990	5531
SPAC3A12.13c	-0.537522	7.65468	-11.6549	4.16458e-06	5.91129e-05	4.45707	5862	5939	5305	4352	4207	4196
SPAC15A10.03c	0.6356	6.20645	11.6295	4.23048e-06	5.97813e-05	4.46272	1463	1436	1276	2231	2346	2447
SPBC1718.03	-0.84467	6.96705	-11.6305	4.22804e-06	5.97813e-05	4.43517	4200	4105	3527	2587	2340	2207
SPCC4F11.02	0.639151	6.51858	11.6231	4.24749e-06	5.98571e-05	4.44391	1867	1658	1652	2808	3006	2914
SPNCRNA.1544	0.599859	5.33909	11.6203	4.25466e-06	5.98571e-05	4.54328	799	809	708	1260	1262	1278
SPBC16D10.01c	-0.697773	7.46106	-11.6117	4.27764e-06	5.99785e-05	4.42338	5148	5189	5456	3454	3623	3477
SPBC1709.12	0.627166	7.28759	11.61	4.28215e-06	5.99785e-05	4.42153	2882	3108	2862	4868	4802	5143
SPCC1322.09	0.662757	7.08531	11.5505	4.44376e-06	6.20017e-05	4.37947	2459	2560	2577	4223	4501	4309
SPNCRNA.1410	1.467	3.34603	11.5496	4.44611e-06	6.20017e-05	4.82974	133	164	134	378	449	466
SPAC23H3.09c	-0.648897	9.26276	-11.537	4.48147e-06	6.22219e-05	4.58888	19064	17953	17167	12562	12146	12708
SPAC2C4.11c	-0.652967	7.11217	-11.5385	4.47729e-06	6.22219e-05	4.36893	4335	4168	3729	2973	2727	2720
SPNCRNA.1068	1.19613	4.75751	11.514	4.54626e-06	6.2984e-05	4.57826	472	461	336	1013	1107	1008
SPAC11E3.14	0.680857	7.00893	11.5013	4.58265e-06	6.32127e-05	4.34601	2431	2286	2444	3967	4247	4226
SPCC285.10c	0.651565	5.9237	11.5017	4.58154e-06	6.32127e-05	4.39523	1101	1146	1162	1917	1931	1951
SPNCRNA.1491	-0.65339	7.17432	-11.4696	4.67479e-06	6.43441e-05	4.32087	4221	4156	4372	2997	2854	2933
SPAC3A12.08	0.712947	4.56938	11.4637	4.69215e-06	6.44436e-05	4.56264	444	456	405	790	786	742
SPCP31B10.06	0.755847	6.62411	11.4569	4.71204e-06	6.45773e-05	4.32635	1783	1783	1775	3017	3524	3252
SPNCRNA.1219	1.8618	0.966378	11.4526	4.72478e-06	6.46126e-05	4.86268	27	21	23	89	93	101
SPAC29E6.06c	-0.541266	8.11829	-11.4424	4.75537e-06	6.47525e-05	4.35353	8125	8035	7448	5941	5651	5978
SPAC4G9.10	-0.515778	6.85449	-11.4444	4.74939e-06	6.47525e-05	4.30737	3424	3311	3015	2434	2508	2438
SPAPB24D3.04c	0.688359	4.54426	11.4337	4.78161e-06	6.49706e-05	4.54593	455	423	415	777	743	738
SPBC12D12.02c	0.891287	5.2375	11.427	4.80178e-06	6.51055e-05	4.43421	671	692	589	1217	1428	1282
SPAC23C4.16c	0.578419	6.41295	11.4114	4.84917e-06	6.56082e-05	4.30103	1759	1669	1489	2605	2655	2681
SPNCRNA.1672	0.667574	4.83131	11.3935	4.9044e-06	6.62146e-05	4.46854	549	559	483	916	893	927
SPBC146.09c	1.30585	8.08112	11.3681	4.98385e-06	6.70027e-05	4.33505	3817	3736	4623	10273	11134	11087
SPNCRNA.638	-0.632761	4.89221	-11.3707	4.97555e-06	6.70027e-05	4.43808	900	860	842	581	624	613
SPAC18B11.04	0.645086	6.60914	11.3423	5.06579e-06	6.7392e-05	4.24575	1963	1768	1768	3044	3276	2996
SPAC2F3.03c	-0.471741	7.0079	-11.3433	5.06269e-06	6.7392e-05	4.2337	3713	3567	3392	2760	2754	2820
SPBC16H5.10c	-0.667868	7.70762	-11.3438	5.06124e-06	6.7392e-05	4.2472	6067	6069	6405	4248	4129	4275
SPBC1778.04	0.524105	5.98631	11.3469	5.0511e-06	6.7392e-05	4.28011	1319	1232	1172	1957	1917	1923
SPBC839.16	-0.672316	8.2206	-11.3514	5.03668e-06	6.7392e-05	4.30706	8759	8997	8739	5636	6173	6233
SPBC428.03c	-0.646308	7.35848	-11.3301	5.10523e-06	6.77749e-05	4.22446	5111	4919	4443	3495	3132	3385
SPCC70.10	0.820686	5.6741	11.3202	5.13754e-06	6.80617e-05	4.29965	851	902	954	1662	1773	1737
SPCC4E9.02	-1.01697	6.32601	-11.3116	5.16573e-06	6.82929e-05	4.23769	2522	2583	2945	1445	1364	1493
SPAC3A12.03c	-0.515039	5.66916	-11.3073	5.17977e-06	6.83364e-05	4.27708	1465	1475	1343	1074	1092	1079
SPAC4G8.05	0.552094	7.16225	11.2809	5.26786e-06	6.93547e-05	4.18991	2789	2736	2799	4374	4473	4379
SPNCRNA.103	2.71333	0.652537	11.2754	5.28637e-06	6.94546e-05	4.68803	12	16	14	103	119	86
SPBC2G2.08	-0.545616	7.89808	-11.2706	5.30235e-06	6.95209e-05	4.20811	6782	6734	6760	5044	4916	5101
SPAC17H9.04c	-0.654519	8.48325	-11.262	5.33171e-06	6.9762e-05	4.28335	10519	10417	10650	7312	6964	7493
SPAC2F3.05c	1.15135	4.89591	11.2559	5.35262e-06	6.98918e-05	4.37541	429	443	542	1124	1112	1142
SPCC1919.15	0.77447	6.49867	11.2461	5.38608e-06	7.01846e-05	4.18351	1612	1550	1707	2955	2908	3159
SPCC290.02	-0.54903	6.54558	-11.2426	5.39831e-06	7.02001e-05	4.175	2697	2756	2504	2047	1930	1914
SPAC23A1.14c	0.691096	6.93477	11.2317	5.43598e-06	7.04911e-05	4.15831	2298	2322	2158	3847	4298	3731
SPBC1711.11	0.720769	4.34388	11.2258	5.45672e-06	7.04911e-05	4.43734	374	371	367	655	689	643
SPCC320.11c	-0.599348	6.99402	-11.2246	5.46087e-06	7.04911e-05	4.15049	3847	3798	3411	2785	2563	2555
SPNCRNA.1202	-0.742004	7.51666	-11.2202	5.47611e-06	7.04911e-05	4.15286	6195	5670	4884	3531	3555	3711
SPNCRNA.1276	0.774269	6.49797	11.2229	5.46676e-06	7.04911e-05	4.16709	1610	1550	1707	2955	2905	3157
SPAC56F8.14c	-0.556772	6.26584	-11.1892	5.58601e-06	7.17605e-05	4.14922	2216	2182	2169	1563	1677	1599
SPAC2C4.10c	0.561854	5.69563	11.1775	5.62836e-06	7.21587e-05	4.1886	1045	1030	929	1630	1546	1627
SPBC1921.05	0.547471	8.52106	11.1614	5.68707e-06	7.24273e-05	4.21997	7382	7156	6855	10998	11224	11657
SPBC23E6.10c	-0.696605	6.92701	-11.1621	5.68431e-06	7.24273e-05	4.10758	3832	3903	3207	2502	2389	2399
SPBC3E7.13c	0.627147	5.02312	11.16	5.69211e-06	7.24273e-05	4.27225	643	608	590	1015	995	1072
SPCC1682.11c	0.606107	6.34194	11.1575	5.7011e-06	7.24273e-05	4.12545	1558	1501	1568	2461	2577	2594
SPNCRNA.981	1.14136	4.24017	11.1561	5.70625e-06	7.24273e-05	4.41645	328	293	275	729	784	635
SPAC3A11.12c	-0.478606	7.12792	-11.138	5.77333e-06	7.29873e-05	4.08656	3960	3936	3726	2937	3008	3092
SPAC3G6.07	3.38215	-0.812571	11.1404	5.76438e-06	7.29873e-05	4.18288	4	3	4	55	46	39
SPAC31G5.09c	0.508467	6.21612	11.1238	5.82666e-06	7.35153e-05	4.1067	1492	1521	1376	2204	2298	2260
SPCC1223.03c	0.985416	5.67449	11.113	5.86713e-06	7.38794e-05	4.15929	845	907	804	1660	2063	1779
SPAC688.12c	-0.851777	5.51081	-11.0757	6.01068e-06	7.55374e-05	4.14006	1514	1561	1253	892	811	887
SPCP1E11.11	-0.622849	8.61646	-11.0573	6.08303e-06	7.62958e-05	4.15918	11711	11717	10868	8371	7630	8135
SPBC17D1.17	1.52267	6.82627	11.0457	6.12908e-06	7.67221e-05	4.0431	1725	1862	1203	5231	5090	4396
SPAC4F10.17	2.53937	2.74109	11.0418	6.14447e-06	7.67636e-05	4.59475	55	48	103	403	415	405
SPAC17C9.11c	0.571866	6.55274	11.0313	6.18675e-06	7.71057e-05	4.02598	1887	1900	1642	2906	2981	2843
SPBC1703.05	-0.662155	6.88345	-11.0289	6.1961e-06	7.71057e-05	4.01295	3612	3591	3259	2543	2214	2411
SPAC23C11.04c	-0.484818	7.07973	-11.0157	6.24978e-06	7.74705e-05	3.99944	3806	3755	3700	2957	2870	2893
SPAC694.06c	0.536016	6.01707	11.0159	6.24881e-06	7.74705e-05	4.04277	1342	1262	1184	1929	1975	2044
SPBC1703.03c	-0.530901	7.097	-11.0025	6.30374e-06	7.77971e-05	3.98981	4011	3970	3611	2920	2774	2995
SPBP8B7.21	-0.548963	7.54666	-11.0037	6.29871e-06	7.77971e-05	3.99481	5354	5223	5336	3904	3848	4039
SPCC1223.10c	0.791854	6.42803	11.0003	6.31284e-06	7.77971e-05	4.01111	1458	1558	1592	3060	2839	2747
SPNCRNA.1310	-2.29926	1.66002	-10.9783	6.4043e-06	7.87716e-05	4.60259	177	188	132	29	45	35
SPAC16A10.04	0.885249	6.43892	10.9622	6.47207e-06	7.94515e-05	3.98435	1690	1559	1272	3013	3117	2869
SPNCRNA.972	0.531807	6.02714	10.9549	6.50307e-06	7.96783e-05	3.99782	1352	1273	1195	1937	1989	2055
SPAC26H5.08c	0.83949	6.62166	10.9433	6.55237e-06	7.99159e-05	3.96251	1675	1666	1845	3223	3559	3270
SPAC2E1P3.05c	-0.703896	7.77739	-10.9358	6.5846e-06	7.99159e-05	3.9618	7135	6907	5756	4248	4495	4364
SPBC16A3.02c	1.39439	7.84925	10.9404	6.56491e-06	7.99159e-05	4.01325	3794	3726	2625	8723	10125	9724
SPBC32H8.06	1.07297	2.37872	10.9436	6.5513e-06	7.99159e-05	4.52833	84	87	80	186	199	189
SPBP16F5.05c	-0.557805	5.95562	-10.9328	6.59777e-06	7.99159e-05	3.98443	1900	1795	1614	1302	1307	1291
SPCC1393.06c	-0.545767	6.78785	-10.9328	6.59787e-06	7.99159e-05	3.94533	3291	3086	3023	2433	2251	2293
SPBC1289.01c	0.523193	7.46947	10.906	6.71469e-06	8.11763e-05	3.92584	3563	3617	3235	5251	5356	5601
SPAC6G10.12c	1.21521	6.70164	10.9004	6.73977e-06	8.11901e-05	3.93326	1809	1804	1258	3929	3984	4191
SPBC28F2.02	-0.505527	7.86151	-10.9	6.74137e-06	8.11901e-05	3.93819	6669	6705	6142	5122	4923	4843
SPAC23C11.03	-0.487575	6.89875	-10.895	6.76349e-06	8.13025e-05	3.91512	3345	3347	3251	2626	2519	2540
SPCC417.06c	1.8396	2.72469	10.8852	6.80753e-06	8.16776e-05	4.46958	99	95	57	311	342	303
SPBC1289.14	3.10697	2.40692	10.8793	6.83378e-06	8.18381e-05	4.52569	26	69	41	374	453	363
SPBC1289.07c	-0.734421	7.73539	-10.8706	6.8733e-06	8.1849e-05	3.91215	6769	6995	5666	4396	4097	4108
SPCC1620.02	1.05558	2.53124	10.8724	6.86496e-06	8.1849e-05	4.46357	90	99	92	209	217	208
SPNCRNA.1436	1.21875	3.60809	10.8738	6.85882e-06	8.1849e-05	4.32126	214	194	157	481	509	432
SPNCRNA.562	-0.592706	5.29573	-10.8637	6.90435e-06	8.2065e-05	4.01037	1202	1159	1038	800	838	801
SPBC106.10	0.489584	6.40241	10.8576	6.9322e-06	8.22423e-05	3.9052	1734	1686	1605	2459	2593	2593
SPCC757.07c	1.99705	7.75688	10.8499	6.9675e-06	8.25072e-05	3.97175	2939	3104	1793	10746	10960	11265
SPNCRNA.897	1.11232	6.85936	10.841	7.00856e-06	8.28391e-05	3.88443	2076	2061	1483	4226	4314	4487
SPCC757.05c	-0.542294	5.88993	-10.8218	7.09847e-06	8.37461e-05	3.90871	1776	1683	1581	1199	1255	1294
SPAC2E1P5.05	-0.48181	7.37172	-10.8132	7.13887e-06	8.40668e-05	3.85092	4685	4675	4417	3685	3490	3515
SPBC2G5.07c	-0.568752	6.46041	-10.8037	7.18408e-06	8.44428e-05	3.86207	2632	2451	2467	1928	1801	1787
SPBC1734.14c	-0.473557	6.37454	-10.7936	7.23226e-06	8.48523e-05	3.85772	2380	2356	2150	1820	1771	1778
SPBC13G1.08c	-0.509697	7.28233	-10.7824	7.28603e-06	8.53257e-05	3.82819	4421	4358	4292	3342	3195	3415
SPBC17A3.01c	-0.616395	7.58433	-10.7774	7.31069e-06	8.54571e-05	3.8326	5600	5396	5727	3816	3977	4032
SPBC25D12.03c	-0.569756	7.406	-10.764	7.37606e-06	8.60631e-05	3.81654	4819	4799	4921	3529	3450	3640
SPBC1685.17	0.69666	5.0929	10.7538	7.42621e-06	8.64896e-05	3.97049	670	618	599	1154	1127	1035
SPAC24C9.14	0.578381	5.98217	10.7476	7.45686e-06	8.66877e-05	3.85071	1200	1215	1225	1896	1998	1996
SPNCRNA.1323	0.695005	4.23994	10.7448	7.47057e-06	8.66886e-05	4.11282	372	349	324	590	618	625
SPAC5H10.02c	1.47537	4.33167	10.7352	7.51859e-06	8.70869e-05	4.11132	349	311	207	881	835	849
SPBPB2B2.18	4.68014	-0.68351	10.7135	7.62813e-06	8.81951e-05	3.87961	1	2	6	81	83	74
SPAC4A8.07c	-0.48262	6.83951	-10.6972	7.71214e-06	8.90045e-05	3.77092	3244	3167	3116	2396	2527	2466
SPBC776.05	0.578737	5.44544	10.6937	7.73012e-06	8.90505e-05	3.86994	896	847	769	1393	1348	1321
SPAC8F11.09c	-0.513706	6.39414	-10.6906	7.74578e-06	8.90695e-05	3.78112	2352	2445	2277	1847	1767	1754
SPAC21E11.06	-0.486143	7.83636	-10.6726	7.8398e-06	8.96501e-05	3.76864	6518	6523	6008	5066	4835	4828
SPAC2C4.12c	-0.504401	6.30043	-10.6745	7.83009e-06	8.96501e-05	3.77337	2255	2171	2180	1699	1638	1709
SPBC409.23	0.765174	3.62351	10.6688	7.86017e-06	8.96501e-05	4.16244	224	223	217	413	416	395
SPCC794.16	1.51665	1.37913	10.6771	7.81637e-06	8.96501e-05	4.40638	33	36	38	115	114	105
SPSNORNA.47	1.25807	2.64771	10.6675	7.86676e-06	8.96501e-05	4.31187	106	97	82	225	266	249
SPBC23G7.06c	0.709188	7.32893	10.6615	7.89855e-06	8.98513e-05	3.74607	2826	2941	3087	5106	5155	5420
SPAC25H1.09	0.515505	5.33	10.6588	7.91305e-06	8.98555e-05	3.85871	813	812	743	1198	1235	1234
SPAC637.09	-0.491343	5.92482	-10.6414	8.00586e-06	9.02077e-05	3.77213	1702	1695	1671	1301	1289	1316
SPBC4C3.05c	-0.545654	8.43351	-10.6397	8.01499e-06	9.02077e-05	3.82435	10029	10082	9304	7032	7225	7575
SPBP4H10.10	0.822675	4.60557	10.6434	7.99504e-06	9.02077e-05	3.97595	466	446	379	769	849	854
SPCC4G3.17	-0.68131	7.38212	-10.6449	7.98691e-06	9.02077e-05	3.72995	5134	4873	4862	3645	3144	3276
SPNCRNA.1235	0.920634	5.80295	10.6456	7.98318e-06	9.02077e-05	3.80173	946	1017	895	1778	2199	1903
SPBC14F5.03c	-0.569104	8.1902	-10.6361	8.03415e-06	9.02636e-05	3.78464	8554	8201	8279	5830	6147	6323
SPBC11C11.02	0.514245	7.35727	10.63	8.06745e-06	9.04777e-05	3.71954	3276	3184	3195	4797	5073	5078
SPAPB8E5.04c	0.725721	8.0373	10.6271	8.08332e-06	9.04962e-05	3.77	4745	4684	4948	8401	9167	8227
SPAC4G8.04	0.820952	7.11395	10.6153	8.14743e-06	9.08939e-05	3.71036	2403	2302	2641	4520	4833	4690
SPBC17A3.08	-0.566902	5.63269	-10.6173	8.1364e-06	9.08939e-05	3.78318	1512	1395	1346	1075	997	1037
SPBC1271.01c	0.615129	5.0643	10.6072	8.19206e-06	9.12317e-05	3.86499	634	656	612	1051	1097	1010
SPAC8C9.03	1.28462	2.89161	10.5876	8.30092e-06	9.22411e-05	4.22473	120	115	99	332	286	268
SPBC1709.05	-0.877659	12.0212	-10.5857	8.31171e-06	9.22411e-05	4.18518	135799	139606	121832	79201	75490	79199
SPAC1B3.11c	0.848116	5.04623	10.5802	8.34269e-06	9.24237e-05	3.85435	630	608	501	1181	1153	1052
SPAC22F3.09c	0.828223	5.91179	10.5637	8.43617e-06	9.32967e-05	3.72622	1010	1030	1145	1945	2083	2088
SPCC1739.06c	-0.880117	8.46796	-10.5466	8.53459e-06	9.42213e-05	3.76575	12499	10426	10980	6050	6994	6901
SPAC977.18	4.67741	-0.448234	10.5347	8.60374e-06	9.44926e-05	3.86693	2	4	3	73	121	93
SPBC1861.01c	0.623072	9.12937	10.5371	8.58935e-06	9.44926e-05	3.85786	10452	11213	10119	17800	17424	17785
SPNCRNA.80	1.73064	1.54444	10.5352	8.60079e-06	9.44926e-05	4.31085	43	42	28	135	127	143
SPNCRNA.998	-0.431785	6.51189	-10.4765	8.95064e-06	9.8133e-05	3.6157	2544	2536	2381	2004	1987	2000
SPBC11B10.07c	0.461707	7.53327	10.4544	9.08649e-06	9.9451e-05	3.5916	3715	3776	3618	5415	5562	5602
SPBC18E5.03c	-0.5029	6.04417	-10.4487	9.12228e-06	9.96711e-05	3.6194	1885	1805	1838	1418	1394	1414
SPBC9B6.10	0.502694	6.66998	10.4385	9.1859e-06	0.000100174	3.58351	2068	2098	1861	3116	2985	3144
SPCP1E11.05c	0.662734	6.62373	10.4363	9.1998e-06	0.000100174	3.58484	2001	1729	1795	2990	3211	3267
SPAC4F8.01	0.757544	6.49375	10.4327	9.22242e-06	0.000100235	3.58822	1712	1769	1417	3047	3085	2812
SPCC757.03c	1.66374	4.68903	10.4304	9.23693e-06	0.000100235	3.83367	418	392	237	1120	1266	1128
SPBC428.18	1.33491	6.19853	10.4253	9.26896e-06	0.00010024	3.61241	1266	1222	821	2907	2862	3143
SPNCRNA.1157	0.93337	3.3575	10.4258	9.26597e-06	0.00010024	4.03048	167	175	179	347	381	351
SPAC23A1.02c	1.39016	6.00431	10.4078	9.38059e-06	0.000101275	3.61958	851	844	1123	2600	2898	2436
SPBC1198.07c	0.66218	4.34351	10.3813	9.55281e-06	0.000102943	3.82534	409	373	354	632	653	662
SPCC330.09	-0.513983	7.63094	-10.3791	9.56744e-06	0.000102943	3.53468	5553	5496	5617	4222	4249	4180
SPNCRNA.1278	1.56109	4.66101	10.3713	9.61892e-06	0.00010318	3.78929	409	412	242	1134	1076	1111
SPNCRNA.735	-0.584479	5.68808	-10.3708	9.62188e-06	0.00010318	3.59216	1528	1479	1436	1119	1001	1093
SPBC14C8.14c	-0.478087	7.00133	-10.3321	9.88181e-06	0.000105707	3.49306	3718	3500	3428	2720	2701	2859
SPBC660.14	0.552806	6.3866	10.3308	9.8908e-06	0.000105707	3.51301	1731	1649	1489	2536	2497	2699
SPNCRNA.190	1.6611	1.49066	10.3261	9.92307e-06	0.000105874	4.16938	43	39	29	134	131	116
SPBC725.15	-0.6136	7.62898	-10.3154	9.99638e-06	0.000106299	3.48769	6127	5915	5230	4327	3918	3968
SPBP8B7.23	0.490557	7.08414	10.3165	9.98886e-06	0.000106299	3.48074	2715	2679	2661	3958	4095	4215
SPNCRNA.299	0.88094	4.07404	10.3066	1.00571e-05	0.000106766	3.82217	318	301	256	609	541	595
SPAC328.09	-0.460426	6.93844	-10.2935	1.0149e-05	0.000107563	3.46466	3498	3331	3298	2716	2604	2654
SPAC22G7.05	-0.477327	6.58117	-10.2694	1.03196e-05	0.000109188	3.45578	2798	2592	2565	2107	2042	2039
SPBC21H7.04	-0.727246	6.53234	-10.2614	1.0377e-05	0.000109613	3.45336	2755	2665	2969	1875	1838	1773
SPAC25B8.13c	-1.64142	5.5331	-10.2585	1.0398e-05	0.000109653	3.56507	1678	1774	2374	661	675	661
SPBC14C8.02	-0.531878	6.89245	-10.2415	1.05216e-05	0.000110772	3.42573	3336	3307	3410	2512	2476	2546
SPBC16H5.11c	-0.453614	7.75313	-10.2354	1.05664e-05	0.000111061	3.43071	6031	6087	5657	4719	4557	4785
SPAC19E9.03	0.816792	8.81721	10.2298	1.06073e-05	0.000111307	3.5807	8070	7473	8388	14441	15541	15730
SPBC16E9.05	-0.704176	8.17836	-10.2253	1.06408e-05	0.000111475	3.47571	9311	9370	7493	5691	5819	5787
SPAC17D4.04	-0.539423	7.20887	-10.2096	1.07579e-05	0.000112147	3.39668	4227	4100	4224	3135	3008	3218
SPAC19A8.07c	-0.729116	7.19574	-10.2101	1.07544e-05	0.000112147	3.39875	4639	4854	3854	3023	2827	2836
SPBC776.17	-0.660861	5.58339	-10.2133	1.07304e-05	0.000112147	3.48553	1484	1480	1286	1042	935	934
SPBC8E4.01c	1.07913	10.1492	10.1863	1.09344e-05	0.0001138	3.71965	17818	16929	20363	41231	41931	42812
SPNCRNA.1445	-0.586933	5.65463	-10.1819	1.09679e-05	0.000113962	3.45101	1537	1485	1329	1100	1035	1001
SPCC4G3.18	-0.4947	7.04991	-10.1687	1.10693e-05	0.000114828	3.36654	3769	3665	3635	2782	2766	2968
SPAC343.20	1.16935	8.53087	10.1565	1.11644e-05	0.000115064	3.49079	5883	6847	4811	13507	14179	14624
SPBC839.07	-0.66781	5.67495	-10.1568	1.11622e-05	0.000115064	3.43102	1489	1523	1519	1111	981	1002
SPCC553.09c	-0.478754	6.46819	-10.1592	1.11436e-05	0.000115064	3.37486	2508	2439	2408	1964	1846	1910
SPNCRNA.685	0.631128	4.82623	10.161	1.11292e-05	0.000115064	3.56925	548	564	493	919	917	857
SPAC2C4.06c	-0.436623	6.04733	-10.1474	1.12353e-05	0.000115235	3.38803	1852	1857	1708	1442	1451	1441
SPBC1685.12c	0.677369	5.79061	10.1513	1.12051e-05	0.000115235	3.42065	1128	1075	890	1776	1783	1781
SPNCRNA.678	-0.469147	6.5878	-10.1497	1.12179e-05	0.000115235	3.363	2803	2596	2570	2118	2059	2057
SPBP8B7.11	-0.487379	8.23196	-10.1411	1.12852e-05	0.00011556	3.41334	8502	8691	7881	6616	6421	6329
SPAC16C9.05	0.63279	7.36477	10.1239	1.14227e-05	0.000115733	3.33649	3313	3285	2749	5401	5014	5244
SPAC2F3.08	0.588101	6.61715	10.1185	1.14659e-05	0.000115733	3.34043	1793	1942	1902	3037	3033	3107
SPAC4H3.02c	0.511899	6.01538	10.1226	1.14329e-05	0.000115733	3.37412	1286	1328	1200	2028	1890	1974
SPBC16H5.08c	-0.620179	9.78461	-10.1228	1.14315e-05	0.000115733	3.62684	26516	26723	23826	18409	17666	18179
SPBC21C3.11	0.57984	6.41356	10.1194	1.14588e-05	0.000115733	3.3491	1641	1777	1499	2579	2714	2656
SPBC27.01c	-0.587656	5.65493	-10.1264	1.14022e-05	0.000115733	3.40805	1539	1484	1330	1101	1036	999
SPNCRNA.1069	1.22011	4.61197	10.1312	1.13643e-05	0.000115733	3.60133	431	421	290	931	1017	905
SPNCRNA.763	-0.49799	5.87062	-10.1217	1.14399e-05	0.000115733	3.38182	1678	1693	1526	1210	1250	1295
SPNCRNA.919	1.4238	3.13894	10.1293	1.13791e-05	0.000115733	3.85708	150	137	96	336	387	380
SPAPB2B4.06	0.706285	5.23337	10.1097	1.15369e-05	0.000116265	3.46328	708	762	609	1188	1262	1216
SPNCRNA.1470	-0.726895	5.18427	-10.1007	1.16101e-05	0.000116633	3.45813	1130	1205	968	723	701	731
SPNCRNA.908	-0.434054	7.17771	-10.1021	1.15989e-05	0.000116633	3.31275	4044	4008	3794	3082	3170	3248
SPBC2G2.12	-0.50237	7.44148	-10.0969	1.1641e-05	0.000116758	3.31057	5069	4954	4551	3591	3643	3910
SPAC13F5.03c	1.39269	3.89552	10.0819	1.1765e-05	0.000117816	3.69609	224	200	222	512	666	673
SPBC19G7.06	0.503569	6.24569	10.0745	1.18264e-05	0.000118245	3.3215	1500	1499	1485	2209	2353	2329
SPAC664.01c	-0.486041	7.20554	-10.0716	1.18509e-05	0.000118305	3.28905	4147	4054	4091	3231	3199	3082
SPCC1682.08c	-0.443398	6.66276	-10.0626	1.19263e-05	0.000118871	3.29248	2897	2752	2669	2187	2172	2267
SPBC14C8.13	-0.485048	7.26483	-10.0447	1.20781e-05	0.000120195	3.2678	4423	4160	4224	3298	3219	3398
SPAC27F1.06c	-0.568627	8.00141	-10.0387	1.21288e-05	0.000120511	3.30412	7301	7222	7432	5547	5150	5361
SPAC27F1.05c	0.625296	5.57027	10.0272	1.22282e-05	0.000121309	3.34819	873	943	877	1437	1587	1478
SPCC1450.13c	0.693357	5.67844	10.0213	1.22792e-05	0.000121625	3.33256	1003	963	871	1668	1780	1528
SPCC1442.10c	-0.440192	7.95585	-10.0173	1.23143e-05	0.000121783	3.27947	7072	6830	6464	5500	5297	5459
SPCC576.16c	1.91218	1.98857	10.0132	1.23501e-05	0.000121948	3.92557	60	35	51	176	208	203
SPAC25B8.01	0.566258	6.07363	10.0023	1.2446e-05	0.000122704	3.27654	1339	1367	1194	2187	2072	1995
SPBC17D11.08	0.952692	6.51912	9.99479	1.25126e-05	0.00012317	3.25162	1698	1728	1258	3145	3335	3256
SPBC14C8.01c	0.618827	5.45382	9.98737	1.25787e-05	0.000123629	3.33243	826	801	863	1362	1408	1369
SPCC584.11c	-0.506772	7.50488	-9.98112	1.26347e-05	0.000123988	3.22135	5030	5069	5135	3807	3862	3953
SPAC5H10.06c	-0.893591	7.41673	-9.97721	1.26699e-05	0.000124141	3.22403	5365	5014	6053	3300	3102	3164
SPAC630.05	0.661178	5.87908	9.97288	1.2709e-05	0.000124333	3.2717	1120	1029	1148	1826	1915	1901
SPAC6F12.06	0.50409	6.63815	9.94408	1.29724e-05	0.000126715	3.20216	2041	1886	1961	3026	3052	2967
SPBC4F6.16c	0.723557	7.96587	9.9411	1.3e-05	0.00012679	3.23593	4980	4833	3950	8169	7926	8410
SPBC317.01	0.594117	6.47737	9.92532	1.31473e-05	0.00012803	3.19425	1677	1847	1588	2673	2783	2896
SPAC1952.04c	0.751042	5.2321	9.90083	1.33796e-05	0.000130028	3.30144	700	651	688	1249	1330	1144
SPAC19G12.10c	0.762934	10.6646	9.89939	1.33933e-05	0.000130028	3.55106	29256	29894	28546	49910	57070	54545
SPBC83.19c	4.8087	-2.09292	9.88057	1.35752e-05	0.000131592	2.92408	1	0	1	28	38	28
SPBC14F5.08	-0.459204	7.19868	-9.87703	1.36097e-05	0.000131726	3.13547	4167	4163	3801	3247	3061	3249
SPNCRNA.1138	-0.455312	6.42918	-9.86447	1.3733e-05	0.000132718	3.14485	2504	2410	2196	1855	1846	1911
SPBC3D6.06c	-0.516152	7.68019	-9.85653	1.38116e-05	0.000133274	3.13038	6092	6011	5203	4412	4253	4413
SPCC663.17	0.683252	4.09649	9.85294	1.38472e-05	0.000133416	3.46524	328	317	304	557	574	522
SPAC1093.05	-0.531497	6.80139	-9.83112	1.40664e-05	0.000135118	3.10606	3183	3054	3201	2399	2291	2385
SPAC19A8.05c	0.784922	6.22767	9.83213	1.40562e-05	0.000135118	3.13506	1243	1344	1438	2396	2571	2534
SPBP19A11.01	-0.458727	7.32349	-9.82875	1.40905e-05	0.000135145	3.09671	4495	4518	4207	3606	3462	3355
SPAC1D4.03c	0.528965	5.6111	9.824	1.41388e-05	0.000135404	3.17962	944	962	957	1478	1539	1459
SPCC1672.05c	-0.712667	8.1187	-9.80864	1.42962e-05	0.000136706	3.14118	9033	9042	7134	5531	5535	5480
SPCC10H11.02	0.695665	4.71253	9.8026	1.43587e-05	0.000137098	3.31114	509	448	494	824	872	847
SPBC20F10.01	-0.695847	8.31436	-9.78566	1.45357e-05	0.000138579	3.15038	9796	10249	8558	6823	6255	6015
SPAC11D3.03c	-0.964551	4.18857	-9.77603	1.46373e-05	0.000138716	3.38874	652	651	500	339	326	330
SPAC15A10.08	0.422484	5.87724	9.77908	1.4605e-05	0.000138716	3.11306	1228	1193	1152	1722	1729	1737
SPAC343.12	1.14176	8.6082	9.77633	1.46341e-05	0.000138716	3.20116	6262	7313	5117	14080	14873	15257
SPBC16E9.12c	-0.416436	6.96112	-9.77918	1.46039e-05	0.000138716	3.06071	3450	3373	3307	2724	2780	2720
SPAC18G6.06	-0.510916	6.76847	-9.7707	1.46938e-05	0.000139045	3.05848	3066	3204	2895	2400	2357	2211
SPAC977.12	-1.11633	5.52678	-9.76284	1.47777e-05	0.000139631	3.15403	1765	1796	1271	801	815	772
SPAC57A10.07	-0.535614	6.75243	-9.75973	1.48111e-05	0.000139643	3.05021	2963	3067	3106	2249	2274	2305
SPBC83.05	0.595462	7.14696	9.75863	1.4823e-05	0.000139643	3.04405	2675	2636	2805	4266	4457	4566
SPAC22F8.09	-0.486822	8.05275	-9.75095	1.49057e-05	0.000140008	3.08029	7418	7588	7120	5942	5535	5637
SPCC1795.11	-0.845277	10.8507	-9.75182	1.48963e-05	0.000140008	3.45378	56218	56029	62063	35509	34650	34964
SPAC57A7.12	-0.546589	9.18506	-9.74558	1.4964e-05	0.000140348	3.25605	17047	16902	15599	12627	11887	12224
SPAC10F6.01c	-0.728668	10.0082	-9.73819	1.50445e-05	0.000140895	3.35217	33683	31174	28661	18978	20802	21295
SPCC1235.13	-0.952067	6.28683	-9.72506	1.51887e-05	0.000141828	3.04482	2367	2430	2874	1418	1422	1439
SPNCRNA.706	0.558278	5.42556	9.7259	1.51794e-05	0.000141828	3.12675	855	877	763	1317	1278	1384
SPCC613.01	-0.676388	6.55191	-9.71736	1.5274e-05	0.000142415	3.02373	2832	2652	2867	2024	1848	1794
SPAC664.08c	-0.529978	7.48679	-9.69905	1.54791e-05	0.00014394	2.99614	4992	5223	4955	3949	3597	3846
SPCC16A11.08	1.02779	5.17346	9.69871	1.54828e-05	0.00014394	3.15943	515	603	672	1343	1291	1290
SPBC119.05c	1.19735	6.99494	9.69503	1.55244e-05	0.000144116	3.00402	1785	1857	2328	4553	5250	4946
SPAC11D3.02c	-0.719256	7.52018	-9.69235	1.55548e-05	0.000144188	2.99583	5942	5910	4806	3695	3405	3819
SPBC19C2.04c	-0.711627	5.73606	-9.67451	1.57586e-05	0.000145865	3.04399	1546	1574	1683	1008	1052	1117
SPCC663.06c	0.665108	4.45183	9.66454	1.58739e-05	0.000146718	3.24916	407	417	398	703	660	739
SPAC12B10.13	0.48329	5.96843	9.65599	1.59735e-05	0.000147246	3.00712	1278	1206	1243	1902	1886	1856
SPCC965.08c	-0.897838	4.01098	-9.65567	1.59773e-05	0.000147246	3.32437	557	529	465	265	320	318
SPBC14F5.09c	-0.475501	7.05371	-9.64541	1.60977e-05	0.00014814	2.9512	3828	3807	3404	2929	2747	2919
SPBC215.06c	-0.727637	6.31336	-9.63276	1.62476e-05	0.000149304	2.96595	2547	2536	2140	1728	1491	1504
SPBC776.09	-0.653732	9.04335	-9.6196	1.64052e-05	0.000150535	3.13398	15536	15027	16007	10571	10340	11198
SPBP8B7.26	0.674912	7.65295	9.6165	1.64426e-05	0.000150661	2.94618	3498	3826	3897	6349	6479	6566
SPAP7G5.03	-0.553436	8.20051	-9.6128	1.64873e-05	0.000150853	2.99058	8782	8681	7668	5829	6307	6392
SPAC13D6.02c	-0.554899	8.98827	-9.6059	1.65711e-05	0.000151402	3.11454	14666	14206	14440	10445	11010	10514
SPNCRNA.1590	-0.676819	7.54057	-9.59848	1.66618e-05	0.000152012	2.91939	5503	6129	4993	3960	3687	3590
SPAC2F7.13c	-0.501408	8.10662	-9.5869	1.68044e-05	0.000153093	2.95474	7976	7600	7508	6075	5603	6001
SPBC19G7.18c	0.717496	5.43218	9.58239	1.68603e-05	0.000153383	3.01523	850	823	702	1458	1474	1298
SPBC16A3.07c	0.443768	7.46988	9.57848	1.6909e-05	0.000153606	2.90038	3625	3601	3472	5190	5112	5471
SPCC18.05c	-0.596669	7.31132	-9.56747	1.70467e-05	0.000154636	2.88701	4631	4429	4687	3484	3167	3207
SPCPB16A4.07	2.00408	5.23254	9.56431	1.70864e-05	0.000154776	3.09103	341	387	651	1845	2056	1830
SPAC1834.11c	0.543382	8.13198	9.56022	1.71381e-05	0.000155023	2.94407	5365	5584	5403	8176	8711	8961
SPBC1A4.07c	-0.445347	7.27804	-9.55443	1.72115e-05	0.000155245	2.87468	4443	4332	3983	3421	3253	3472
SPBP8B7.20c	-0.49335	8.87643	-9.55457	1.72097e-05	0.000155245	3.05513	13407	13377	12478	10005	9864	10344
SPAC4A8.02c	0.44345	5.79334	9.5375	1.74282e-05	0.000156978	2.92564	1153	1124	1070	1598	1641	1693
SPNCRNA.1100	1.52032	4.81931	9.51944	1.76628e-05	0.000158865	3.09379	489	443	273	1166	1312	1181
SPAC1A6.11	1.36714	1.75769	9.50562	1.78446e-05	0.000159373	3.55648	52	45	50	122	148	144
SPAC27D7.09c	1.17836	5.41224	9.50836	1.78084e-05	0.000159373	2.97692	676	825	522	1611	1712	1570
SPBC26H8.13c	0.44269	5.89316	9.5112	1.77709e-05	0.000159373	2.89476	1254	1202	1133	1754	1809	1721
SPBC947.07	-0.477799	6.2347	-9.50899	1.78001e-05	0.000159373	2.86706	2160	2177	1925	1669	1627	1571
SPNCRNA.834	1.04923	2.62733	9.5063	1.78357e-05	0.000159373	3.44499	108	107	87	208	234	236
SPBC21H7.05	-0.559829	6.16102	-9.48913	1.80643e-05	0.00016021	2.85544	2097	2104	1917	1616	1447	1437
SPBPB7E8.02	0.620176	6.12455	9.48969	1.80568e-05	0.00016021	2.86152	1375	1285	1301	2017	2283	2307
SPCC1442.09	-0.483413	7.0081	-9.49218	1.80235e-05	0.00016021	2.82662	3861	3580	3291	2792	2688	2823
SPCC320.14	0.468787	5.70605	9.49025	1.80494e-05	0.00016021	2.89682	1049	1039	1034	1518	1578	1586
SPNCRNA.869	2.58348	0.0732569	9.48966	1.80572e-05	0.00016021	3.51184	7	9	14	67	70	58
SPCC285.11	0.639084	6.47617	9.47998	1.81876e-05	0.00016108	2.83507	1641	1626	1756	2696	2937	2842
SPAC16C9.03	-0.478186	8.16307	-9.47704	1.82275e-05	0.000161208	2.8724	7981	7991	7831	6397	6130	6003
SPAC1556.06	0.820297	4.09912	9.44823	1.86226e-05	0.000163791	3.14411	287	298	323	601	550	584
SPAC23A1.03	-0.785301	7.78423	-9.45269	1.85609e-05	0.000163791	2.81704	7161	7278	6008	4660	4300	3876
SPNCRNA.626	0.865807	3.15515	9.44877	1.86152e-05	0.000163791	3.31176	170	152	142	306	288	323
SPNCRNA.779	0.815241	6.14706	9.44834	1.86211e-05	0.000163791	2.82943	1297	1397	1084	2380	2584	2220
SPAC17G8.14c	0.480268	7.04549	9.43558	1.87991e-05	0.000165116	2.78005	2644	2606	2620	3799	4013	4091
SPAC1565.02c	0.460069	5.71387	9.42004	1.90187e-05	0.000166814	2.83786	1082	1088	981	1515	1596	1584
SPAC13G7.10	0.655562	6.20493	9.40815	1.91885e-05	0.000168071	2.78954	1372	1493	1278	2184	2366	2522
SPBC32H8.02c	0.720188	4.58726	9.40616	1.92172e-05	0.000168089	3.01478	495	420	406	813	795	746
SPBC3E7.17	4.47863	-2.26016	9.40433	1.92434e-05	0.000168089	2.67873	0	1	1	23	22	29
SPAPB24D3.02c	-0.598232	5.54936	-9.39879	1.93235e-05	0.00016839	2.83784	1337	1315	1404	945	990	966
SPBC1773.10c	-0.607203	9.4534	-9.39828	1.93308e-05	0.00016839	3.0106	21488	21172	18394	14652	13915	14755
SPCPB16A4.03c	-0.584075	9.19631	-9.38595	1.95103e-05	0.000169721	2.96571	16688	16765	17081	12392	11806	12360
SPAC18G6.12c	0.493064	6.3429	9.38359	1.95449e-05	0.00016979	2.75958	1573	1647	1595	2514	2370	2460
SPAC4F8.08	1.73078	1.65206	9.37818	1.96244e-05	0.000170247	3.4744	40	39	41	119	159	161
SPCC757.12	0.946673	6.94648	9.37231	1.9711e-05	0.000170766	2.73409	2451	2160	1707	4158	4590	4324
SPNCRNA.721	-0.84382	2.83578	-9.35799	1.99241e-05	0.000172377	3.28582	230	217	225	137	129	139
SPAC13G6.10c	-0.650268	10.4025	-9.34926	2.00554e-05	0.000173277	3.08164	39979	42332	37195	26533	27838	28045
ENSRNA049678178	2.84594	-1.48446	9.34042	2.01892e-05	0.000173961	3.07032	3	2	3	22	22	28
SPBC21B10.07	0.576509	7.33012	9.34092	2.01817e-05	0.000173961	2.70367	3082	3044	3147	4814	5332	4854
SPBC3E7.12c	0.39959	8.03255	9.32514	2.04231e-05	0.000175738	2.73237	5566	5416	5073	7659	7617	7657
SPBC29A10.10c	-0.429502	7.35331	-9.31955	2.05094e-05	0.000176004	2.68013	4534	4396	4424	3549	3532	3665
SPNCRNA.07	4.62323	2.05052	9.3213	2.04822e-05	0.000176004	3.45913	23	20	15	419	749	456
SPAC3H1.10	-0.446256	6.26341	-9.28919	2.09852e-05	0.000179845	2.68278	2145	2155	2012	1746	1647	1627
SPAC23C4.15	-0.436431	7.53946	-9.28566	2.10412e-05	0.000180082	2.65546	5322	5194	4733	4195	4053	3950
SPNCRNA.436	1.06159	3.8549	9.28316	2.10812e-05	0.000180182	3.05935	246	260	201	587	474	539
SPCC320.08	-0.450051	7.79262	-9.27917	2.11449e-05	0.000180484	2.66494	6262	6292	5702	5020	4697	4754
SPBC56F2.15	1.72982	5.4693	9.27124	2.12722e-05	0.000181327	2.80053	683	698	386	2002	2338	1855
SPBC16E9.06c	-0.616123	8.41031	-9.2615	2.143e-05	0.000182184	2.73466	10612	10582	8604	6925	7036	6983
SPCC330.06c	1.20011	9.12717	9.2632	2.14024e-05	0.000182184	2.85387	9634	9549	7065	21621	24351	18942
SPAC25G10.04c	1.78631	4.94141	9.25938	2.14645e-05	0.000182233	2.87265	339	311	557	1409	1544	1390
SPAC1039.05c	-0.681525	5.81414	-9.25577	2.15234e-05	0.000182489	2.68999	1605	1638	1776	1142	1155	1090
SPCC970.11c	1.12237	2.65074	9.25133	2.15959e-05	0.000182861	3.23989	109	90	100	212	254	241
SPACUNK12.02c	1.00283	5.92605	9.24492	2.17013e-05	0.000183454	2.68435	916	957	1169	2148	2289	2122
SPAP7G5.04c	-0.555446	7.98023	-9.24357	2.17237e-05	0.000183454	2.65564	7537	7504	6551	4958	5460	5479
SPNCRNA.215	2.63206	1.84034	9.23163	2.19216e-05	0.00018488	3.36721	46	46	17	223	246	214
SPCPJ732.03	2.07304	0.313795	9.22896	2.19661e-05	0.00018501	3.36826	12	12	18	59	64	70
SPAC6G9.16c	0.515874	4.81498	9.22594	2.20167e-05	0.000185191	2.81852	561	581	515	870	850	846
SPBC713.09	0.501091	6.52505	9.21212	2.22496e-05	0.000186903	2.60822	1813	1777	1858	2785	2836	2733
SPBP4H10.09	0.762903	3.79433	9.19403	2.25587e-05	0.000189	2.98955	257	275	219	444	471	463
SPCC162.06c	0.543232	5.5021	9.19508	2.25407e-05	0.000189	2.67847	910	855	877	1452	1397	1324
SPAC12G12.02	-0.491534	6.81248	-9.1865	2.26887e-05	0.000189682	2.57543	3076	3116	3187	2449	2385	2394
SPBC428.11	-0.759747	8.79035	-9.18586	2.26998e-05	0.000189682	2.73609	15338	13660	11800	8048	8954	8964
SPAC637.11	-0.423709	5.61634	-9.18227	2.27621e-05	0.000189953	2.64485	1369	1332	1297	1052	1083	1094
SPAC29E6.01	0.607616	6.523	9.16917	2.29912e-05	0.000191363	2.57301	1909	1843	1515	2857	2887	2914
SPCC576.17c	0.479654	5.37014	9.1693	2.29889e-05	0.000191363	2.67392	832	824	808	1192	1267	1265
SPBC1271.10c	-0.392384	6.8856	-9.161	2.31355e-05	0.000192312	2.55198	3277	3240	3021	2556	2675	2640
SPAC823.04	-0.668145	6.59681	-9.15871	2.31761e-05	0.000192398	2.5597	2726	2970	2895	2117	1877	1870
SPAC1782.10c	-0.575345	8.34269	-9.14534	2.34147e-05	0.000193872	2.62456	10282	9426	8300	6953	6626	6696
SPCC364.01	-1.01225	5.08646	-9.14592	2.34042e-05	0.000193872	2.70889	1117	1024	1269	644	610	570
SPAP14E8.02	0.80851	8.79492	9.14097	2.34934e-05	0.000194019	2.70041	8695	8377	6713	14968	14188	15675
SPBPB2B2.01	0.75533	6.04444	9.14147	2.34843e-05	0.000194019	2.57887	1251	1336	1010	2086	2192	2267
SPAC3A11.06	0.810714	5.82267	9.13894	2.35299e-05	0.000194068	2.59995	1117	1081	831	1810	1980	1934
SPNCRNA.703	-0.904423	3.31602	-9.12897	2.37106e-05	0.000195306	3.01943	346	316	297	175	209	172
SPBC354.05c	-0.507244	6.9382	-9.12071	2.38616e-05	0.000196295	2.51679	3507	3496	3289	2430	2679	2745
SPAC513.06c	0.489969	6.50205	9.11354	2.39934e-05	0.00019687	2.52539	1854	1745	1784	2596	2789	2810
SPBC725.01	-0.448112	8.27741	-9.11507	2.39651e-05	0.00019687	2.58605	8921	8766	7861	6805	6597	6854
SPCC663.15c	0.425772	7.86999	9.1053	2.4146e-05	0.000197866	2.52909	4801	4888	4522	6793	6737	7154
SPAC21E11.03c	1.07684	7.00612	9.10074	2.42309e-05	0.000198306	2.50719	1887	1942	2443	4482	4870	4891
SPBC26H8.08c	-0.563324	8.42999	-9.09599	2.43197e-05	0.000198778	2.5973	9874	9830	9792	7702	6893	7071
SPAC1834.13	1.18401	2.04673	9.09014	2.44295e-05	0.000199299	3.19591	62	76	55	156	165	153
SPAC26F1.12c	-0.542706	7.04724	-9.08759	2.44775e-05	0.000199299	2.48663	3903	3899	3449	2934	2595	2838
SPAC513.05	0.498591	6.54373	9.0885	2.44603e-05	0.000199299	2.50244	1893	1792	1839	2674	2874	2913
SPBC2A9.06c	-0.440072	6.02098	-9.08368	2.45514e-05	0.000199437	2.52396	1867	1732	1726	1451	1388	1412
SPNCRNA.1657	1.05066	3.9432	9.08338	2.45572e-05	0.000199437	2.87657	268	275	212	620	500	575
SPBC29A3.06	-0.46381	7.13257	-9.06597	2.48894e-05	0.000201877	2.46667	4078	3781	3745	3180	2936	3000
SPAC222.06	-0.472905	7.57059	-9.05564	2.50887e-05	0.000203234	2.46224	5454	5426	4899	4324	3944	4045
SPAC23C4.17	-0.460938	6.5415	-9.0537	2.51265e-05	0.000203281	2.47062	2630	2525	2536	2019	1936	2102
SPAC56F8.03	-0.502771	8.73334	-9.04821	2.52334e-05	0.000203887	2.60886	11840	11904	11897	8884	9033	9363
SPAC4G9.11c	0.773021	6.34841	9.04208	2.53534e-05	0.000204263	2.47449	1561	1608	1243	2723	2883	2530
SPBC16E9.08	0.685047	4.19857	9.04091	2.53763e-05	0.000204263	2.78378	324	340	355	578	594	601
SPCC1494.06c	-0.446793	7.09392	-9.0431	2.53332e-05	0.000204263	2.44757	3872	3683	3671	3027	2842	3058
SPCP20C8.03	-1.25942	3.4025	-9.03896	2.54146e-05	0.000204313	2.93629	442	326	391	177	187	157
SPAC2F3.07c	1.29299	1.27014	9.03676	2.54581e-05	0.000204404	3.22978	35	37	35	91	91	105
SPBPB8B6.06c	-1.03523	2.47497	-9.0346	2.55006e-05	0.000204487	3.08221	194	180	185	89	112	95
SPCC576.02	-0.495297	5.42369	-9.03089	2.5574e-05	0.000204818	2.54283	1215	1213	1158	884	974	900
SPAC4G9.07	0.980362	3.4581	9.02258	2.57392e-05	0.000205881	2.91142	172	192	186	378	438	363
SPCC550.08	-0.537169	6.00354	-9.01261	2.59392e-05	0.00020722	2.46505	1801	1818	1819	1441	1303	1320
SPAC17G6.15c	-0.534564	7.52597	-9.00941	2.60037e-05	0.000207223	2.42209	5125	5449	5043	4049	4000	3642
SPBC32H8.12c	-0.735786	11.2211	-9.00936	2.60047e-05	0.000207223	2.88591	77528	75793	64282	46208	46143	48729
SPBC1105.07c	-0.420838	6.77493	-9.0042	2.61091e-05	0.000207794	2.42045	3031	3117	2778	2465	2380	2373
SPNCRNA.888	0.566034	6.12818	8.99586	2.62789e-05	0.000208884	2.44464	1463	1419	1179	2145	2173	2173
SPAC13C5.06c	0.474776	5.39722	8.99149	2.63684e-05	0.000209334	2.51804	879	816	821	1236	1303	1249
SPBC16D10.07c	-0.477827	5.73132	-8.98854	2.64289e-05	0.000209552	2.46718	1455	1518	1439	1134	1191	1108
SPAC2C4.17c	0.655496	6.64787	8.9819	2.65658e-05	0.000210376	2.40838	1826	1830	1970	2987	3255	3365
SPAC25B8.05	-0.511776	4.87279	-8.96805	2.68541e-05	0.000212395	2.58543	846	850	767	598	646	627
SPAC16C9.01c	0.704832	5.73593	8.95969	2.70296e-05	0.000213517	2.45304	1059	1062	832	1753	1788	1653
SPBC660.09	0.486116	5.89769	8.95409	2.71481e-05	0.000213922	2.42578	1212	1150	1183	1867	1748	1766
SPCC1742.01	1.4003	6.0747	8.95411	2.71477e-05	0.000213922	2.4366	911	926	1094	2923	2235	3291
SPCC18B5.04	-0.402997	6.80928	-8.95012	2.72323e-05	0.000214319	2.37278	3091	3102	2886	2492	2397	2550
SPBC1683.03c	-0.673636	7.64713	-8.93926	2.74644e-05	0.000215347	2.36974	6467	6416	5053	4086	4079	3935
SPBC543.02c	-0.549357	8.09985	-8.94004	2.74477e-05	0.000215347	2.41161	7748	7699	7901	5873	5433	6010
SPBP4H10.12	0.791867	5.66116	8.94014	2.74454e-05	0.000215347	2.4482	955	950	807	1653	1902	1543
SPAC6F12.16c	-0.704923	7.65538	-8.92354	2.78041e-05	0.000217474	2.3574	5826	5755	6555	3923	3955	4173
SPBC6B1.12c	-0.703806	4.74601	-8.9242	2.77899e-05	0.000217474	2.57426	871	839	707	569	503	533
SPBC23E6.04c	-0.537499	7.95185	-8.91773	2.79308e-05	0.000218197	2.37317	7212	6808	6973	5066	5028	5600
SPBC11G11.01	0.396256	6.86878	8.91252	2.80452e-05	0.000218821	2.33947	2488	2343	2340	3363	3447	3414
SPCC736.02	-0.531793	5.00307	-8.91065	2.80863e-05	0.000218874	2.51166	945	872	897	652	699	682
SPNCRNA.1171	0.482935	5.56034	8.89617	2.84072e-05	0.000221103	2.41302	991	949	871	1472	1425	1359
SPBC3H7.14	-0.432034	6.47059	-8.89345	2.84679e-05	0.000221305	2.33476	2387	2474	2388	1945	1897	1980
SPAC1687.07	0.648951	4.00317	8.8916	2.85092e-05	0.000221355	2.69298	318	316	268	526	498	507
SPBC336.03	-0.655258	6.81858	-8.88986	2.8548e-05	0.000221387	2.32122	3352	3107	3522	2207	2254	2401
SPCC825.01	-0.49669	8.29438	-8.88692	2.8614e-05	0.000221628	2.39325	8899	8414	8930	6663	6726	6774
SPAC10F6.03c	-0.514457	9.08934	-8.87862	2.88015e-05	0.00022248	2.521	16248	15585	14074	11929	11412	11415
SPAC10F6.10	-0.444448	6.31925	-8.87899	2.8793e-05	0.00022248	2.32929	2213	2209	2133	1822	1675	1725
SPNCRNA.927	0.397422	5.62376	8.8774	2.8829e-05	0.00022248	2.38626	1026	1020	977	1448	1432	1434
SPBC3H7.13	0.572093	6.32059	8.86979	2.90021e-05	0.000223544	2.32405	1498	1496	1622	2467	2487	2475
SPBC15C4.04c	-0.607654	6.75381	-8.86725	2.906e-05	0.00022372	2.30305	3225	2918	3242	2129	2215	2326
SPCC1494.05c	-0.459708	7.19808	-8.85124	2.94288e-05	0.000226285	2.28009	4228	3996	3900	3154	3039	3363
SPBC32H8.03	-0.418027	6.7802	-8.84004	2.96898e-05	0.000228016	2.27774	3098	3022	2826	2474	2310	2470
SPCC330.08	-0.447089	7.16715	-8.82917	2.99458e-05	0.000229705	2.26096	4193	4077	3567	3093	3110	3184
SPBC15C4.06c	0.736355	4.60604	8.82665	3.00054e-05	0.000229884	2.52148	428	427	474	751	829	816
SPAC57A7.08	0.60543	8.21214	8.82142	3.01296e-05	0.000230559	2.33266	5394	5653	5877	9119	9535	9253
SPBC24C6.02	-0.628119	7.03196	-8.81171	3.0362e-05	0.000231948	2.24823	3796	3660	4000	2841	2538	2656
SPBC25B2.05	-0.65471	7.38338	-8.81079	3.03841e-05	0.000231948	2.24801	5146	5192	4442	3738	3249	3185
SPAC1006.02	-0.47864	5.88253	-8.80761	3.04606e-05	0.000232253	2.29598	1614	1685	1602	1309	1210	1293
SPAC23D3.17	0.942156	4.62831	8.80185	3.05999e-05	0.000233035	2.50105	450	417	389	919	957	752
SPCC1739.01	-0.97527	7.95777	-8.79989	3.06475e-05	0.000233119	2.28563	7713	7564	9341	4109	4767	4689
SPAC14C4.07	0.671974	7.10734	8.78609	3.09845e-05	0.00023512	2.2272	2548	2406	2744	4205	4593	4482
SPAC24C9.11	-0.407043	6.29097	-8.78672	3.09689e-05	0.00023512	2.24977	2220	2152	1979	1674	1745	1767
SPAC186.01	1.97453	4.18138	8.7818	3.109e-05	0.000235484	2.60852	208	192	247	1047	687	1057
SPAC23C11.16	0.555522	6.37888	8.78113	3.11066e-05	0.000235484	2.24347	1601	1701	1532	2386	2579	2740
SPCC622.15c	1.07888	6.70512	8.77715	3.12051e-05	0.000235949	2.23273	1509	1596	1984	3564	3931	4082
SPAPJ695.01c	2.2538	-0.318797	8.74303	3.20632e-05	0.000241959	2.95641	11	8	6	40	51	42
SPBC19C7.06	-0.505422	9.34155	-8.74183	3.20938e-05	0.000241959	2.4382	18908	18901	16689	13673	13947	13900
SPCC70.02c	1.13462	7.54221	8.74104	3.21141e-05	0.000241959	2.21562	3335	3400	2264	7147	7221	6708
SPBC1677.03c	-0.464769	8.49802	-8.73572	3.22505e-05	0.000242699	2.29581	10184	10033	9676	7676	7590	8220
SPAC24H6.08	0.585673	5.36966	8.72608	3.24992e-05	0.000243993	2.29419	769	772	836	1292	1266	1301
SPCC338.04	0.566236	5.07678	8.7269	3.24779e-05	0.000243993	2.34278	639	706	609	1056	1075	1001
SPAC13A11.04c	0.524255	5.63613	8.72087	3.26345e-05	0.000244721	2.25089	1014	1048	864	1498	1521	1530
SPCC663.05c	-0.513553	6.15273	-8.71471	3.27954e-05	0.000245637	2.19474	2011	1918	2055	1481	1548	1511
SPAC16C9.06c	-0.425401	7.415	-8.703	3.31037e-05	0.000247654	2.14986	4695	4644	4578	3683	3638	3915
SPAC959.03c	-0.559484	7.84436	-8.69451	3.33294e-05	0.00024905	2.16679	6515	6441	6674	5106	4530	4821
SPBC17D11.05	-0.5665	9.88964	-8.67931	3.37375e-05	0.000251804	2.45292	27384	26968	26875	19316	19421	20750
SPBC36.08c	-0.371381	7.48908	-8.67591	3.38294e-05	0.000252194	2.12641	4969	4859	4560	4029	3915	4103
SPAC1002.19	1.61699	4.04126	8.66691	3.40746e-05	0.000253427	2.51943	288	243	151	659	829	725
SPAC13D6.04c	0.453676	6.30182	8.66754	3.40573e-05	0.000253427	2.14576	1707	1598	1448	2415	2299	2328
SPAC8C9.04	0.445951	8.2944	8.66491	3.41294e-05	0.000253538	2.20237	6432	6413	6089	8886	9731	9347
SPNCRNA.1246	0.74452	2.92286	8.66266	3.4191e-05	0.000253699	2.69395	135	139	137	245	245	257
SPAC1782.02c	-0.473071	6.00359	-8.65855	3.4304e-05	0.000254077	2.15479	1855	1780	1687	1475	1342	1339
SPAC18G6.11c	-0.606647	7.32939	-8.6568	3.43521e-05	0.000254077	2.11016	4580	4436	4963	3302	3251	3388
SPBC2G5.01	-0.431299	8.01602	-8.65645	3.43617e-05	0.000254077	2.14923	7239	7174	6750	5941	5579	5489
SPAC2G11.13	0.67913	5.98078	8.64779	3.46017e-05	0.000255554	2.15337	1149	1113	1255	1999	2155	1942
SPNCRNA.1251	-0.770785	3.49283	-8.64315	3.47311e-05	0.000256212	2.57156	326	367	342	207	223	226
SPAC20H4.08	-0.454701	5.95985	-8.62905	3.51274e-05	0.000258391	2.13156	1708	1719	1700	1411	1315	1329
SPAC631.02	0.418039	7.86088	8.62687	3.51889e-05	0.000258391	2.11039	4738	4800	4615	6557	7015	6929
SPBC29A3.01	-0.736085	6.20616	-8.62792	3.51593e-05	0.000258391	2.11624	2367	2469	1909	1349	1517	1502
SPNCRNA.640	-0.563799	5.86241	-8.62906	3.51272e-05	0.000258391	2.14095	1655	1646	1676	1312	1184	1157
SPCC737.03c	0.56987	6.85698	8.62034	3.53747e-05	0.000259156	2.08316	2307	2160	2230	3329	3867	3593
SPNCRNA.614	-0.541155	4.07587	-8.62073	3.53635e-05	0.000259156	2.43765	496	481	454	347	366	352
SPBC1539.10	-0.44632	7.14951	-8.60641	3.57744e-05	0.000261783	2.06394	4044	4066	3572	3188	2963	3128
SPAPYUG7.03c	0.514183	9.22721	8.60482	3.58202e-05	0.000261817	2.30086	11834	11665	11784	18082	17815	18752
SPAC1039.04	-0.553738	5.47601	-8.60282	3.5878e-05	0.000261938	2.16197	1390	1251	1162	926	984	893
SPAC5D6.02c	-0.459326	4.84261	-8.59732	3.60377e-05	0.000262201	2.26629	808	795	764	634	603	628
SPBC19F5.05c	-0.526429	8.71481	-8.59825	3.60106e-05	0.000262201	2.21288	11882	12638	11025	9324	8588	8799
SPCC569.04	1.06502	3.39184	8.59937	3.59781e-05	0.000262201	2.56227	182	160	168	330	419	414
SPAC2F3.02	-0.394844	7.81241	-8.59142	3.62098e-05	0.000263133	2.06937	6429	6132	5608	4905	5022	5021
SPCC61.03	0.413381	6.67274	8.5901	3.62485e-05	0.000263133	2.06081	2212	2042	1973	3071	2996	2913
SPBC887.13c	-0.410127	5.88503	-8.58804	3.6309e-05	0.000263163	2.10034	1678	1647	1475	1299	1285	1325
SPCC338.17c	0.45277	7.09319	8.58714	3.63354e-05	0.000263163	2.04826	2835	2788	2595	3836	4062	4296
SPNCRNA.1292	0.717851	5.34285	8.58387	3.64315e-05	0.000263558	2.17664	837	782	622	1295	1374	1304
SPBC15C4.01c	-0.35807	6.66102	-8.56403	3.70214e-05	0.000267522	2.03618	2773	2715	2577	2298	2284	2234
SPAC4G9.09c	-0.450043	8.94535	-8.56031	3.71332e-05	0.000268025	2.21811	13863	13848	12862	10725	10981	10464
SPAC24B11.05	0.618906	5.57929	8.55625	3.72557e-05	0.000268604	2.11443	917	882	916	1375	1557	1593
SPBC6B1.08c	-0.540578	7.63989	-8.5476	3.7518e-05	0.000270189	2.02049	5627	5392	5916	4254	4125	4236
SPNCRNA.1055	1.05	3.33	8.54453	3.76116e-05	0.000270557	2.52506	155	157	180	327	374	404
SPNCRNA.1108	0.928852	2.88614	8.52039	3.8357e-05	0.000275607	2.58095	139	134	105	263	244	271
SPNCRNA.58	0.867337	4.08212	8.5153	3.85162e-05	0.000276439	2.35351	352	288	249	608	561	577
SPAC57A10.06	-1.91349	0.77079	-8.51164	3.8631e-05	0.00027695	2.83718	80	82	70	21	31	16
SPCC1442.04c	0.412148	7.32592	8.49225	3.92466e-05	0.000281047	1.96277	3439	3325	3036	4525	4868	4727
SPBC1703.07	-0.474957	8.84048	-8.48944	3.93368e-05	0.000281375	2.13691	13414	12872	11805	9657	9704	10299
SPAC186.05c	0.618543	6.87031	8.48521	3.94727e-05	0.000282031	1.96165	2123	2162	2367	3772	3724	3560
SPAC14C4.05c	0.574018	6.69931	8.47289	3.98721e-05	0.000284564	1.95551	1970	1958	2067	3008	3284	3387
SPAC869.08	1.7449	0.450813	8.46914	3.99945e-05	0.000285118	2.80557	15	15	22	65	61	63
SPAC31G5.21	0.519981	5.48148	8.46602	4.00966e-05	0.000285526	2.04344	955	904	774	1363	1374	1344
SPAC31A2.02	-0.513576	5.34983	-8.45664	4.04058e-05	0.000286764	2.04857	1211	1158	1063	892	903	810
SPBC17A3.04c	-0.448233	8.42414	-8.45811	4.03571e-05	0.000286764	2.03443	9931	9173	9150	7599	7206	7629
SPNCRNA.1071	2.04666	3.77448	8.45772	4.037e-05	0.000286764	2.40368	167	241	96	767	738	629
SPAC1B3.16c	-1.03093	8.65886	-8.44543	4.07785e-05	0.000289086	2.07018	11902	12830	16240	7274	7227	7090
SPBC359.05	-0.638032	6.49678	-8.43812	4.10236e-05	0.0002905	1.93013	2862	2761	2334	1739	2010	1782
SPCC569.02c	1.7048	2.83889	8.43442	4.11484e-05	0.00029106	2.53961	128	67	92	315	371	302
SPAC637.07	-0.474941	9.55445	-8.42768	4.13766e-05	0.000292349	2.18692	21248	21175	19984	16424	15909	16313
SPCC306.07c	-0.439384	6.38105	-8.42434	4.14904e-05	0.000292828	1.92122	2309	2368	2157	1908	1814	1739
SPAC12B10.04	-0.447596	5.4067	-8.41297	4.18799e-05	0.000295249	1.99886	1209	1211	1070	948	925	897
SPCC1620.09c	0.572173	7.26882	8.41122	4.19401e-05	0.000295345	1.89113	2842	2923	3143	4829	4713	4797
SPNCRNA.1495	0.747448	4.89272	8.40449	4.21732e-05	0.000296658	2.09244	556	599	465	906	986	1049
SPAC23G3.12c	-0.378365	7.93033	-8.40286	4.22296e-05	0.000296727	1.90981	6664	6555	6354	5455	5295	5570
SPCC16A11.02	-0.460092	7.11929	-8.376	4.3175e-05	0.000303035	1.85586	3890	3745	3841	3103	2859	3083
SPCC1442.01	0.847321	4.30244	8.3733	4.32713e-05	0.000303376	2.18187	360	307	371	621	716	682
SPBC354.14c	0.437102	7.46393	8.36715	4.34918e-05	0.000304251	1.8522	3538	3511	3629	5244	5173	5248
SPNCRNA.691	0.678809	4.03471	8.36761	4.34753e-05	0.000304251	2.22561	319	280	313	506	544	530
SPNCRNA.902	-0.573074	5.31604	-8.36477	4.35774e-05	0.000304515	1.97169	1191	1233	1006	857	825	809
SPCC1223.14	-0.525396	8.96907	-8.3577	4.38329e-05	0.000305964	2.03889	14685	14917	12816	11086	10323	10453
SPAC29A4.20	-0.403683	7.15694	-8.35259	4.40184e-05	0.000306922	1.83369	4096	3899	3573	3260	3082	3122
SPAC222.12c	-0.666577	10.5148	-8.34673	4.42323e-05	0.000308075	2.22984	46111	46204	37992	28465	29850	30249
SPBC19G7.17	-0.493544	7.41498	-8.33226	4.47657e-05	0.000310617	1.81602	5021	4462	4782	3731	3540	3700
SPBC3B9.19	-0.441363	8.26196	-8.33154	4.47925e-05	0.000310617	1.89091	8833	8763	7639	6561	6860	6665
SPBC4C3.07	-0.479869	9.18402	-8.33407	4.46987e-05	0.000310617	2.05096	16700	16859	14866	12209	12657	12695
SPCP31B10.02	0.438723	4.93223	8.33376	4.471e-05	0.000310617	2.01381	633	624	588	880	928	902
SPBC28F2.03	-1.00858	9.46664	-8.3292	4.48794e-05	0.00031088	2.08642	26101	26918	18616	12904	13502	11672
SPAC1635.01	0.689366	9.38183	8.32424	4.50645e-05	0.000311823	2.06996	13222	13327	10640	21970	21915	20708
SPAC630.09c	0.425551	6.28702	8.32087	4.51905e-05	0.000312355	1.83275	1623	1676	1450	2243	2309	2350
SPAC1F8.05	1.93514	5.26649	8.30694	4.57163e-05	0.000315321	1.99733	446	531	414	1497	2667	1755
SPAC23G3.06	-0.486816	9.30452	-8.30297	4.58675e-05	0.000315321	2.03983	18277	17300	17119	14083	13353	13315
SPAC25A8.03c	-0.509757	5.51986	-8.30642	4.57361e-05	0.000315321	1.88624	1387	1337	1140	984	985	963
SPAC664.09	-0.359279	6.65783	-8.30339	4.58515e-05	0.000315321	1.79907	2740	2678	2630	2228	2271	2299
SPNCRNA.1001	-0.443176	5.42049	-8.30396	4.58297e-05	0.000315321	1.89705	1217	1221	1080	961	935	905
SPAC2C4.15c	0.6544	6.29463	8.30072	4.59536e-05	0.000315571	1.81626	1397	1691	1337	2516	2492	2502
SPAC869.07c	2.61044	0.151324	8.29939	4.60044e-05	0.000315579	2.65667	12	6	14	58	77	74
SPNCRNA.319	3.98976	-3.02882	8.29144	4.63095e-05	0.00031733	1.94778	0	1	0	13	10	13
SPBC29B5.02c	0.659816	6.12553	8.28629	4.65087e-05	0.000318352	1.81362	1277	1304	1328	2006	2284	2420
SPAC110.04c	-0.796376	10.5893	-8.26764	4.7237e-05	0.000322228	2.16708	52146	51256	40481	29634	27966	31621
SPAC2F3.09	0.473266	9.25929	8.26993	4.71468e-05	0.000322228	2.00288	12658	12308	11657	18628	17573	18888
SPAC31A2.06	-0.475691	7.90684	-8.26899	4.71841e-05	0.000322228	1.78576	6512	6611	6789	5270	4992	5267
SPBC23G7.07c	-0.572073	6.98071	-8.26661	4.72777e-05	0.000322228	1.75774	3733	3555	3551	2897	2434	2588
SPBC9B6.07	-0.526642	6.48733	-8.2539	4.77822e-05	0.000325318	1.76048	2698	2570	2323	2052	1788	1869
SPNCRNA.312	2.20668	0.537832	8.24285	4.82256e-05	0.000327986	2.62355	21	17	10	67	80	92
SPBP16F5.06	-0.620599	6.44826	-8.22129	4.91037e-05	0.000333601	1.73267	2499	2409	2721	1822	1832	1717
SPAPB2B4.04c	0.536423	6.82315	8.21714	4.92752e-05	0.000333697	1.71639	2199	2130	2290	3297	3466	3643
SPNCRNA.606	2.72236	3.94868	8.21941	4.91815e-05	0.000333697	2.19332	133	158	132	758	1479	913
SPNCRNA.987	2.11607	0.280567	8.21778	4.92487e-05	0.000333697	2.60074	14	18	9	56	74	63
SPBC1E8.05	0.764803	10.5079	8.21143	4.95115e-05	0.00033494	2.1074	25740	25314	27578	44216	51014	49861
SPBC1773.14	-0.509585	5.36916	-8.20135	4.99324e-05	0.000337429	1.81128	1164	1233	1077	887	924	832
SPBC83.15	-0.489507	7.68733	-8.1835	5.0687e-05	0.000342164	1.68853	6030	5673	5496	4710	4117	4458
SPAC27D7.11c	0.941434	8.4012	8.1791	5.0875e-05	0.000343069	1.79082	6264	6515	4598	11561	12046	12112
SPCC1259.09c	-0.334665	7.31358	-8.16534	5.14683e-05	0.000346702	1.65877	4333	4282	3965	3563	3623	3616
SPNCRNA.627	1.04263	1.62433	8.16359	5.15443e-05	0.000346847	2.46615	52	46	52	109	109	118
SPNCRNA.130	2.50758	2.4314	8.16045	5.16807e-05	0.000347397	2.40128	66	56	39	279	455	276
SPAC2E1P3.02c	0.567558	4.8564	8.15013	5.21326e-05	0.000349399	1.8612	584	598	496	865	942	884
SPAC31G5.07	1.00666	2.62601	8.14989	5.21433e-05	0.000349399	2.29822	93	97	117	217	219	229
SPNCRNA.1255	1.49403	1.08109	8.15003	5.21369e-05	0.000349399	2.51906	30	37	22	90	95	85
SPAC23H4.10c	-0.528961	8.50218	-8.14807	5.22233e-05	0.000349566	1.76396	10827	10803	9129	8054	7387	7583
SPCC1259.15c	0.454815	6.36753	8.1396	5.25986e-05	0.000351708	1.66053	1697	1784	1494	2496	2425	2451
SPBC1A4.05	-0.39285	7.43287	-8.13748	5.26926e-05	0.000351966	1.63418	4599	4708	4625	3903	3748	3850
SPAPB1A10.12c	-0.357634	7.71353	-8.13525	5.27919e-05	0.00035226	1.64315	5877	5565	5293	4672	4815	4654
SPCC1259.03	-0.536796	6.45047	-8.12787	5.31227e-05	0.000354096	1.64469	2709	2509	2218	1946	1853	1743
SPAC144.13c	0.532427	5.67832	8.11789	5.35734e-05	0.000356426	1.69713	975	980	1043	1521	1544	1630
SPAC4A8.11c	-0.531545	9.91078	-8.11764	5.35845e-05	0.000356426	1.94742	27444	26967	27021	19635	20266	21198
SPBC4B4.08	-0.397481	7.2819	-8.11568	5.36735e-05	0.000356646	1.61276	4459	4319	3818	3390	3486	3464
SPCC70.08c	0.70107	5.12065	8.11317	5.37879e-05	0.00035666	1.78175	723	672	537	1094	1187	1106
SPNCRNA.1463	1.3681	3.52933	8.11354	5.3771e-05	0.00035666	2.10871	140	156	219	437	462	514
SPAC5H10.12c	-0.430209	6.20175	-8.10889	5.39835e-05	0.000357585	1.63901	2015	1955	2043	1600	1614	1620
SPAC2E1P5.03	0.348213	7.90915	8.1056	5.41343e-05	0.00035821	1.6362	5064	5103	4829	6967	6841	6875
SPAC24H6.10c	-0.895282	8.27054	-8.10326	5.42416e-05	0.000358547	1.69208	10809	11508	7778	5848	5656	5744
SPAP8A3.14c	-0.403173	6.43459	-8.0974	5.45122e-05	0.000359962	1.61589	2422	2252	2328	1923	1884	1928
SPBC609.01	0.918993	3.67357	8.09254	5.47375e-05	0.000361074	2.04872	230	194	230	398	475	467
SPAC14C4.01c	0.399773	6.1388	8.08505	5.50866e-05	0.000363001	1.62184	1542	1433	1347	2008	2119	2046
SPAC3A12.04c	-0.587153	4.45103	-8.07795	5.542e-05	0.00036482	1.87059	628	606	653	465	443	451
SPAC23D3.08	-0.384995	6.63523	-8.07306	5.56512e-05	0.000365924	1.58507	2836	2728	2444	2209	2235	2189
SPACUNK4.15	0.658719	5.65656	8.07197	5.57028e-05	0.000365924	1.66076	1051	959	826	1573	1754	1517
SPNCRNA.164	4.08617	-2.98057	8.07016	5.57888e-05	0.00036611	1.83228	1	0	0	16	10	13
SPAC1805.15c	0.624892	5.96451	8.06729	5.59251e-05	0.000366627	1.62179	1158	1125	1260	1869	1957	2090
SPCC895.06	-0.362985	7.81349	-8.06068	5.62406e-05	0.000368315	1.58086	6017	6067	5868	5020	4952	5158
SPBC28F2.08c	0.365193	7.38976	8.05705	5.6415e-05	0.000368698	1.56074	3544	3491	3365	4860	4671	4988
SPCC1450.07c	0.375919	6.11082	8.05817	5.63611e-05	0.000368698	1.59819	1453	1430	1386	2003	2060	1941
SPAC23H4.09	-0.562009	8.10529	-8.05257	5.66309e-05	0.000369729	1.61038	8420	8393	6853	6045	5607	5632
SPAC1F8.03c	-1.71743	2.54264	-8.04987	5.67614e-05	0.000369821	2.23766	255	321	184	81	84	79
SPBC29A10.11c	0.427071	6.99926	8.05063	5.67242e-05	0.000369821	1.5557	2645	2521	2599	3621	3786	3910
SPBC4C3.03	-0.429627	6.31645	-8.04002	5.72403e-05	0.00037256	1.56764	2319	2095	2101	1695	1724	1819
SPAC1399.03	-0.559568	7.23475	-8.03081	5.76921e-05	0.000375117	1.53409	4325	4011	4547	3091	3158	3213
SPNCRNA.979	-0.414121	5.98478	-8.02762	5.78497e-05	0.000375757	1.5767	1690	1744	1710	1363	1386	1434
SPNCRNA.690	-0.387586	6.01218	-8.02591	5.7934e-05	0.000375921	1.57286	1727	1795	1674	1419	1405	1479
SPAC1527.03	-0.355499	7.30585	-8.0179	5.83325e-05	0.000376585	1.52007	4223	4304	4070	3461	3573	3635
SPBC13A2.03	-0.539118	7.32226	-8.02075	5.81902e-05	0.000376585	1.52452	4588	4285	4712	3477	3202	3452
SPBC15D4.14	-0.342393	6.71458	-8.01866	5.82945e-05	0.000376585	1.53112	2869	2798	2658	2398	2312	2403
SPCC24B10.07	0.50265	7.30726	8.02022	5.82167e-05	0.000376585	1.52686	3129	3038	3198	4529	4802	5059
SPNCRNA.704	-0.403841	6.79017	-8.0226	5.80984e-05	0.000376585	1.53292	3247	2973	2757	2472	2439	2426
SPAC1834.01	-0.488571	8.53533	-8.01361	5.85469e-05	0.000376821	1.64329	10546	10113	10265	8328	7503	8083
SPAC19B12.02c	0.84584	10.8164	8.01373	5.85407e-05	0.000376821	1.95993	35229	34106	26196	60652	60964	62661
SPBC32F12.09	0.526582	6.93193	8.01565	5.84449e-05	0.000376821	1.52432	2311	2388	2462	3508	3876	3800
SPNCRNA.01	0.577591	4.4926	8.01141	5.86571e-05	0.000377149	1.8032	463	443	392	655	733	711
SPAC1610.04	0.421638	6.18168	8.00874	5.87916e-05	0.000377632	1.54706	1551	1536	1335	2089	2118	2201
SPCC830.11c	-0.533769	5.5737	-8.00607	5.89262e-05	0.000378115	1.59902	1394	1262	1380	1047	988	983
SPAC3A12.09c	-0.490949	4.38146	-7.99838	5.93157e-05	0.000379847	1.80865	591	588	559	444	466	430
SPCC1827.02c	-0.415708	7.07349	-7.99893	5.92877e-05	0.000379847	1.50475	3666	3597	3684	2858	3009	3028
SPBC649.04	-0.923726	7.02559	-7.9955	5.94619e-05	0.000380401	1.50497	4847	4675	3292	2379	2459	2375
SPBC28E12.04	-0.622327	5.84081	-7.99293	5.95935e-05	0.000380859	1.55819	1667	1557	1788	1129	1188	1205
SPAC23D3.09	-0.379983	6.64226	-7.98836	5.98272e-05	0.000381969	1.50463	2845	2735	2453	2219	2252	2206
SPAC3H1.06c	-0.556757	7.55049	-7.97338	6.06021e-05	0.0003862	1.4851	5513	5701	4828	4163	3609	4035
SPCC330.12c	0.40643	8.44518	7.9732	6.06113e-05	0.0003862	1.59078	7313	7171	6829	10649	10093	9874
SPCC1223.11	-0.364134	6.96836	-7.97146	6.07022e-05	0.000386392	1.48042	3481	3435	3094	2730	2846	2842
SPAC630.15	0.41694	6.29415	7.96249	6.11723e-05	0.000388995	1.49668	1654	1691	1444	2267	2310	2338
SPBC428.15	-0.440665	5.47263	-7.94675	6.20066e-05	0.000393906	1.55483	1300	1253	1095	971	968	967
SPAC139.02c	-0.431102	6.65145	-7.94437	6.21341e-05	0.000394322	1.46259	2998	2744	2494	2235	2200	2167
SPAC9.08c	0.969033	6.68258	7.93801	6.24758e-05	0.000395701	1.46237	1617	1541	2051	3482	3664	3816
SPBC8D2.10c	-0.41727	7.94019	-7.93864	6.24417e-05	0.000395701	1.47803	6863	6559	6553	5454	5142	5624
SPAC1952.10c	0.712795	5.4758	7.93062	6.28751e-05	0.000397834	1.55306	803	750	901	1427	1525	1391
SPBC211.04c	-0.483371	6.21187	-7.92885	6.29716e-05	0.000398048	1.46801	2045	2051	2071	1551	1527	1707
SPAPB8E5.09	-0.423641	8.34639	-7.92338	6.32693e-05	0.00039937	1.52305	9180	9253	8144	7398	6959	7076
SPBC25H2.04c	-0.424365	6.41895	-7.92271	6.33063e-05	0.00039937	1.45097	2488	2356	2143	1963	1812	1860
SPCC132.03	0.656987	6.17722	7.92021	6.34432e-05	0.000399837	1.46609	1510	1427	1144	2368	2388	2181
SPBC1683.02	-0.636023	4.3878	-7.90698	6.41729e-05	0.000404035	1.72255	672	615	553	429	457	396
SPCC1322.04	1.52992	10.0945	7.90518	6.4273e-05	0.000404265	1.77868	17973	17953	10702	45080	49618	46889
SPCC777.09c	-0.588553	9.72403	-7.90228	6.44346e-05	0.000404881	1.72168	24752	26914	21630	17520	17475	17586
SPBC409.16c	-0.391665	6.04474	-7.89789	6.46796e-05	0.000406019	1.44847	1871	1754	1699	1483	1506	1407
SPCC18B5.07c	-0.467066	8.14308	-7.89615	6.47774e-05	0.000406232	1.46477	7753	7615	8016	6149	5916	6284
SPAC17D4.02	-0.425209	6.32509	-7.89472	6.48577e-05	0.000406335	1.42873	2317	2110	2116	1833	1692	1753
SPAC22H10.12c	0.619182	7.85532	7.88566	6.53687e-05	0.000409134	1.43045	4764	4732	3735	7275	7522	7094
SPAC6G10.07	-0.398268	7.639	-7.8838	6.54745e-05	0.000409393	1.40063	5484	5294	5325	4469	4225	4554
SPAC12G12.06c	-0.398155	8.02419	-7.87938	6.57259e-05	0.000410158	1.43088	7120	6889	7018	5800	5603	5898
SPNCRNA.1231	0.732547	4.20908	7.8805	6.56621e-05	0.000410158	1.74005	377	361	278	622	601	596
SPBPB10D8.04c	-1.69467	1.42293	-7.87451	6.60044e-05	0.000411492	2.24337	123	94	124	35	31	48
SPAC7D4.10	-0.34564	7.32226	-7.86926	6.6306e-05	0.000412968	1.37793	4459	4315	3938	3653	3569	3604
SPNCRNA.941	0.972019	4.05733	7.86446	6.65831e-05	0.000414288	1.76134	304	327	216	616	558	607
SPAC977.16c	1.04082	5.92451	7.85823	6.69447e-05	0.000415318	1.43858	1002	1088	897	1856	2685	2180
SPCC970.10c	-0.460292	6.4814	-7.85948	6.68717e-05	0.000415318	1.3877	2432	2447	2496	1889	1878	2045
SPNCRNA.70	3.23067	-3.93662	7.85873	6.69153e-05	0.000415318	1.57776	0	0	0	6	4	4
SPAC1F3.10c	0.391062	7.54005	7.85623	6.7061e-05	0.000415635	1.37388	3868	3807	3762	5166	5594	5502
SPAC16A10.06c	0.377548	5.59562	7.85364	6.72124e-05	0.000416167	1.45234	1019	990	976	1423	1413	1366
SPBC16A3.16	0.485237	5.90094	7.85068	6.73857e-05	0.000416834	1.41843	1259	1224	1077	1917	1729	1751
SPAC4F8.15	0.512128	7.88012	7.84248	6.78682e-05	0.000419411	1.38754	4493	4561	4833	6938	7190	7335
SPNCRNA.1123	1.86729	0.195475	7.83465	6.83326e-05	0.000421871	2.28444	11	12	19	58	53	54
SPBC409.07c	-0.458868	6.6999	-7.83263	6.84535e-05	0.000422207	1.35392	2996	2717	2870	2203	2198	2364
SPAC343.01c	-0.392652	6.38712	-7.8286	6.8694e-05	0.00042328	1.3618	2368	2184	2200	1918	1838	1815
SPBC6B1.09c	0.383885	6.01745	7.82656	6.88165e-05	0.000423625	1.3838	1337	1342	1311	1919	1908	1816
SPAPB18E9.04c	1.05496	6.47065	7.82373	6.89869e-05	0.000424263	1.36322	1626	1549	1191	2684	3508	3648
SPAC1F8.02c	3.52384	0.428499	7.81741	6.93681e-05	0.000425373	2.26713	5	8	17	94	154	105
SPAC458.02c	-0.4245	8.95726	-7.81754	6.93601e-05	0.000425373	1.53062	13663	13876	12998	11233	10892	10605
SPNCRNA.324	3.14976	-1.46125	7.8196	6.9236e-05	0.000425373	2.08309	1	3	4	29	24	28
SPNCRNA.1005	-0.524637	6.32082	-7.81418	6.95641e-05	0.000426164	1.35178	2249	2152	2350	1690	1624	1770
SPBC660.13c	0.399026	7.60894	7.80833	6.99208e-05	0.000427937	1.33064	4007	4019	3937	5412	5820	5874
SPBC365.11	0.356367	5.86655	7.79598	7.06802e-05	0.000431754	1.36638	1249	1214	1166	1711	1689	1634
SPCC162.11c	-0.384037	6.48894	-7.79694	7.06205e-05	0.000431754	1.32651	2556	2336	2334	2016	1943	2037
SPAC2F7.11	-0.651456	5.33743	-7.79169	7.09457e-05	0.000432653	1.43123	1378	1102	1104	794	831	835
SPBC31F10.07	-0.388057	6.94032	-7.79141	7.09635e-05	0.000432653	1.30788	3420	3289	3181	2788	2586	2818
SPCC1450.10c	-0.41835	6.08308	-7.78642	7.12743e-05	0.000434131	1.33839	1861	1800	1854	1544	1454	1474
SPCC338.06c	0.816538	7.21587	7.77762	7.18255e-05	0.00043707	1.29857	3066	2806	2107	5147	4935	4967
SPAC1565.04c	1.00822	5.02362	7.75632	7.31814e-05	0.00044447	1.46887	480	495	657	1199	1213	1102
SPAC17A2.08c	-0.395447	5.64856	-7.75726	7.31206e-05	0.00044447	1.34857	1359	1334	1355	1094	1110	1130
SPNCRNA.883	0.549761	4.54303	7.75383	7.33412e-05	0.000445016	1.54658	449	461	445	668	725	759
SPBC17D1.07c	0.469802	5.85747	7.7517	7.34786e-05	0.000445425	1.32628	1153	1121	1194	1789	1685	1728
SPAC1F12.05	-0.551384	6.57379	-7.74453	7.39438e-05	0.000446967	1.27333	2637	2605	2881	1934	2016	2051
SPBP8B7.16c	-1.28587	8.71936	-7.74524	7.38976e-05	0.000446967	1.42599	13196	13513	20534	7026	6938	6660
SPNCRNA.643	-0.511594	5.1568	-7.7449	7.39197e-05	0.000446967	1.41399	1062	1022	917	782	795	704
SPNCRNA.1633	-0.354685	6.08058	-7.74075	7.41897e-05	0.000448027	1.29393	1875	1805	1708	1569	1492	1503
SPAC16.04	-0.343332	7.3022	-7.73718	7.44234e-05	0.000449012	1.24992	4243	4319	3956	3564	3472	3651
SPAC29A4.04c	-0.421214	8.4313	-7.73497	7.45684e-05	0.00044946	1.35609	9883	9841	8468	7556	7595	7590
SPBC1198.12	0.649837	3.97255	7.73193	7.47686e-05	0.00045024	1.6432	277	314	291	502	525	472
SPAC4F8.03	-0.416841	6.96865	-7.73038	7.48705e-05	0.000450427	1.24792	3539	3606	3064	2820	2733	2714
SPAC20H4.01	-0.467368	6.86503	-7.72799	7.50283e-05	0.00045095	1.24785	3247	3120	3280	2567	2381	2617
SPBC32H8.05	-0.690938	7.61919	-7.72615	7.515e-05	0.000451255	1.2527	5847	5688	6045	4477	3718	3658
SPAC1F5.07c	0.354014	5.9097	7.7237	7.53128e-05	0.000451806	1.29229	1305	1263	1176	1709	1773	1701
SPBC13E7.10c	0.419511	5.56597	7.71134	7.61384e-05	0.000455898	1.31944	1024	990	873	1350	1411	1418
SPBC530.03c	-0.356712	6.52333	-7.71144	7.61318e-05	0.000455898	1.24168	2500	2549	2283	2100	2015	2084
SPNCRNA.1051	-0.419814	8.43282	-7.70938	7.62702e-05	0.000456258	1.33138	9890	9845	8473	7571	7608	7597
SPBC14F5.10c	0.39299	6.19316	7.70808	7.63578e-05	0.000456353	1.25649	1579	1565	1358	2152	2135	2107
SPBC16H5.12c	0.516931	8.07211	7.69536	7.72207e-05	0.000461076	1.26804	5098	5211	5528	7993	8258	8308
SPCC1494.04c	-0.436371	6.33092	-7.69292	7.73876e-05	0.000461639	1.23278	2318	2304	1983	1810	1686	1783
SPBC577.13	0.368315	6.0169	7.68688	7.78022e-05	0.000463678	1.24775	1339	1338	1333	1838	1894	1877
SPAC4F10.09c	-0.81478	8.1822	-7.68453	7.79645e-05	0.00046421	1.27483	8460	8302	10468	5690	5425	5609
SPCC11E10.01	0.437481	7.43896	7.68258	7.80992e-05	0.000464577	1.20259	3704	3636	3176	5331	4872	5207
SPBC18E5.07	0.462251	8.94683	7.67873	7.83655e-05	0.000465726	1.39399	9850	10093	9643	14085	14549	15585
SPAC17G8.01c	-0.569018	6.70532	-7.67222	7.88194e-05	0.000467986	1.19794	2950	2814	3192	2228	2202	2104
SPBC13G1.09	-0.496435	7.72018	-7.65726	7.98718e-05	0.000473792	1.18662	6397	6087	5211	4753	4368	4423
SPNCRNA.1104	-0.59703	6.80417	-7.64189	8.09706e-05	0.000479862	1.16543	3378	3443	2880	2534	2292	2121
SPAC1B3.02c	-0.391096	6.74874	-7.62538	8.21688e-05	0.000486057	1.14984	2947	2908	2812	2497	2403	2266
SPNCRNA.1229	0.508799	4.07729	7.62609	8.21168e-05	0.000486057	1.51662	352	340	304	505	527	503
SPBC21H7.06c	1.25757	5.5369	7.61896	8.26401e-05	0.000488391	1.2665	798	888	489	1798	1919	1771
SPAC57A7.06	-0.457231	7.92001	-7.61606	8.28541e-05	0.000488945	1.16295	6448	6655	6866	5163	5406	5202
SPAP27G11.15	-0.387782	6.35159	-7.61366	8.30318e-05	0.000488945	1.15353	2312	2128	2137	1882	1792	1771
SPBC106.13	0.737999	5.27534	7.61353	8.30414e-05	0.000488945	1.27718	654	678	786	1285	1335	1193
SPNCRNA.770	-0.511868	8.81206	-7.61513	8.29229e-05	0.000488945	1.30856	11928	13052	12802	9848	9486	9388
SPNCRNA.1499	1.02322	1.19707	7.61103	8.32265e-05	0.000489581	2.02049	40	39	33	84	80	84
SPBC543.06c	-0.433281	6.96274	-7.60871	8.33992e-05	0.000489691	1.12851	3642	3489	3092	2875	2645	2671
SPCC970.12	-0.489164	3.87179	-7.60901	8.33768e-05	0.000489691	1.53835	424	412	384	313	311	317
SPBC17A3.09c	-0.39784	6.17199	-7.60457	8.37078e-05	0.000491049	1.15467	2030	1899	1897	1617	1521	1654
SPAC3A11.11c	0.494507	6.32784	7.6035	8.37872e-05	0.000491063	1.14704	1721	1650	1407	2291	2501	2485
SPBC15D4.01c	0.446778	5.2853	7.5937	8.4524e-05	0.000494925	1.2465	788	777	785	1097	1184	1191
SPCC645.04	-0.329357	6.18783	-7.59154	8.46874e-05	0.000495425	1.14051	1970	1965	1818	1626	1647	1686
SPAC22A12.08c	0.46276	7.1529	7.58143	8.54568e-05	0.000499466	1.1	2915	2863	2754	3990	4618	4156
SPAC15E1.04	0.340048	7.43493	7.58003	8.55641e-05	0.000499635	1.09958	3674	3631	3519	4803	4945	5102
SPCC191.10	4.66666	-1.76288	7.57804	8.57161e-05	0.000500063	1.76045	0	1	3	36	47	30
SPBC2G2.13c	-0.348198	8.15547	-7.56913	8.64027e-05	0.000503606	1.14562	7820	7629	7203	6396	6264	6616
SPBC1347.09	-0.352472	7.03387	-7.54828	8.80339e-05	0.000512644	1.0671	3482	3478	3459	2914	2913	3017
SPAC1B1.03c	-0.456141	8.23902	-7.54497	8.82963e-05	0.000513702	1.13636	8261	8139	8496	6408	6404	6878
SPCC162.04c	1.10936	1.30423	7.54365	8.84009e-05	0.00051384	1.9467	42	37	38	82	95	99
SPAC869.11	-0.590445	7.27423	-7.54075	8.86316e-05	0.000514711	1.05843	4353	4188	4850	3205	3213	3202
SPBC4C3.10c	0.525487	7.70354	7.5386	8.88026e-05	0.000515233	1.07488	4363	4350	3566	6623	6408	6053
SPBC1709.02c	-0.432616	8.81216	-7.53249	8.92918e-05	0.0005176	1.22678	13010	12694	11140	9824	9611	10067
SPBC106.17c	-0.566488	8.42867	-7.53075	8.94322e-05	0.000517941	1.15656	10989	9705	8934	6635	7442	7542
SPCC1450.02	-0.3876	8.12196	-7.52539	8.98642e-05	0.00051997	1.09779	7795	7668	6988	5936	6175	6472
SPBP8B7.09c	-0.535412	7.04692	-7.52342	9.00237e-05	0.000520419	1.04249	3819	3517	3876	2797	2626	2962
SPCC1442.16c	0.636511	7.26881	7.52033	9.02747e-05	0.000521396	1.04253	3232	3127	2415	4838	4860	4967
SPNCRNA.1362	0.525231	4.41036	7.51592	9.06342e-05	0.000522997	1.34027	415	437	395	624	691	631
SPAC1687.23c	1.72077	-0.106425	7.5142	9.07745e-05	0.000523332	2.00801	14	12	9	37	48	43
SPBC12D12.07c	-0.383492	6.82856	-7.50936	9.11715e-05	0.000525145	1.03258	3243	3072	2833	2632	2430	2530
SPAC140.02	-0.572606	9.446	-7.49851	9.20682e-05	0.000529351	1.29211	19335	19820	20705	15414	14268	13989
SPCC4G3.13c	0.519417	6.47315	7.49926	9.20057e-05	0.000529351	1.03699	1862	1882	1503	2748	2641	2724
SPNCRNA.1606	-0.699886	4.14555	-7.49364	9.24738e-05	0.000531202	1.37166	509	507	574	339	360	358
SPAC8E11.01c	-0.422607	5.12513	-7.48201	9.34509e-05	0.00053633	1.15968	938	972	933	745	755	798
SPCC1020.03	0.492201	5.18687	7.47844	9.37528e-05	0.000537578	1.15055	746	770	649	1049	1157	1091
SPBC2G2.14	-0.372682	6.83732	-7.47152	9.43417e-05	0.000540468	0.994511	3030	3046	3080	2513	2557	2593
SPBC21B10.13c	0.52757	5.82812	7.46938	9.45247e-05	0.000541029	1.05172	1208	1176	960	1793	1735	1677
SPAC56F8.13	-0.542909	4.982	-7.46725	9.47069e-05	0.000541584	1.17398	893	870	922	618	689	690
SPAC57A10.03	-0.531704	6.0078	-7.46456	9.49383e-05	0.000542098	1.02729	1870	1743	1833	1473	1355	1260
SPBC12C2.04	0.596365	7.98775	7.46323	9.50526e-05	0.000542098	1.02978	5240	5269	4115	8103	7835	7861
SPCC126.06	0.390301	7.17841	7.46412	9.49764e-05	0.000542098	0.982208	3158	3100	2669	4214	4239	4193
SPBP4G3.02	2.17391	10.7447	7.45974	9.5354e-05	0.00054333	1.43207	15475	15405	28360	89522	92471	96674
SPBC16A3.15c	-0.429885	9.07946	-7.45113	9.61011e-05	0.000546119	1.19078	14941	15186	14083	12315	11386	11863
SPNCRNA.1258	1.063	4.96745	7.4514	9.60775e-05	0.000546119	1.18083	607	584	366	1170	1171	1114
SPSNORNA.24	1.66938	0.793756	7.4512	9.60954e-05	0.000546119	1.92347	27	24	17	95	71	71
SPAC1639.01c	0.409487	8.77072	7.44972	9.62242e-05	0.00054633	1.13743	9015	8740	8909	12629	12799	12972
SPAC144.12	-0.352471	8.38926	-7.44772	9.63989e-05	0.000546834	1.06386	9272	8748	8651	7453	7597	7581
SPBC32F12.03c	1.25049	8.09001	7.44125	9.69665e-05	0.000549563	1.05089	4565	5107	3052	10902	11167	10015
SPNCRNA.1632	-0.525521	6.43397	-7.43899	9.71656e-05	0.000550201	0.976247	2433	2286	2590	1835	1810	1849
SPAC1A6.05c	-0.382734	6.57489	-7.43439	9.75733e-05	0.000552019	0.96487	2580	2663	2422	2192	2016	2162
SPAC3F10.03	-0.384626	8.84482	-7.4328	9.77138e-05	0.000552322	1.13301	12932	12619	11474	10084	10336	10264
SPBC1289.13c	-0.379273	7.07455	-7.4193	9.89215e-05	0.000558652	0.937261	3705	3497	3618	2989	2930	3095
SPCC622.11	1.01924	5.76262	7.41804	9.90343e-05	0.000558792	1.02372	803	800	1118	1958	1999	1927
SPAC17A5.10	0.528037	5.59326	7.41056	9.9712e-05	0.000562118	1.02027	918	905	1010	1473	1486	1458
SPCC965.04c	0.361055	6.71837	7.40757	9.99835e-05	0.000563149	0.93428	2188	2159	2191	2969	3063	3068
SPCC1840.03	-0.557217	8.70983	-7.40524	0.000100196	0.000563846	1.08154	11517	11502	12742	8845	8530	8972
SPCC1020.08	-0.444208	7.80827	-7.39796	0.000100864	0.000567102	0.934343	6569	6478	5425	4973	4771	4907
SPCC338.07c	-0.335505	7.91223	-7.39644	0.000101003	0.000567385	0.941268	6458	6498	6093	5408	5321	5629
SPNCRNA.1424	0.838487	4.50575	7.39512	0.000101125	0.000567567	1.20703	340	446	417	768	727	821
SPBC32H8.04c	-0.334165	7.66067	-7.38833	0.000101754	0.000570592	0.912153	5525	5390	5082	4719	4429	4599
SPBC1778.05c	0.312612	6.60357	7.3867	0.000101906	0.000570942	0.916805	2083	2072	1986	2720	2741	2803
SPCC777.06c	0.322895	6.31409	7.38402	0.000102155	0.000571835	0.926771	1738	1670	1600	2311	2225	2250
SPNCRNA.1280	0.360269	6.71797	7.3761	0.000102897	0.000575484	0.902468	2187	2159	2192	2968	3062	3065
SPAC25B8.06c	-0.33422	6.228	-7.37284	0.000103204	0.000576693	0.919124	2057	2014	1856	1700	1737	1654
SPAC26A3.17c	-0.549156	5.39066	-7.37025	0.00010345	0.000577242	1.00322	1254	1293	1038	923	875	848
SPBC8E4.12c	1.47307	2.15973	7.36893	0.000103575	0.000577242	1.661	62	47	84	172	198	196
SPCC584.03c	0.405565	5.90693	7.36968	0.000103504	0.000577242	0.941334	1232	1228	1208	1658	1779	1832
SPAC20G4.01	-0.38536	6.62668	-7.36568	0.000103883	0.000578295	0.893663	2657	2680	2610	2317	2145	2135
SPBC713.02c	0.425781	8.28102	7.36502	0.000103946	0.000578295	0.96718	6213	6297	6372	8823	9220	9468
SPBC19F5.02c	-0.564112	6.81356	-7.36112	0.000104318	0.000579859	0.884319	3204	2981	3457	2373	2297	2384
SPNCRNA.1187	1.90438	2.32752	7.35831	0.000104586	0.000580843	1.64073	79	83	33	251	257	235
SPAC2C4.09	0.35671	6.0268	7.35677	0.000104734	0.000581157	0.917734	1365	1338	1351	1905	1872	1848
SPNCRNA.1363	-0.412468	5.51972	-7.35055	0.000105333	0.000583968	0.961292	1334	1282	1117	1010	1013	1009
SPCC645.08c	-0.456861	8.39539	-7.34814	0.000105566	0.00058475	0.965744	9074	9249	9429	7407	6956	7578
SPAC20H4.03c	-0.310563	7.47636	-7.3446	0.00010591	0.000586143	0.860095	4685	4717	4554	4060	4067	4067
SPCC162.05	0.451144	6.24625	7.34355	0.000106011	0.000586197	0.890554	1572	1610	1394	2404	2228	2144
SPAC5H10.09c	-0.501057	3.89519	-7.34118	0.000106242	0.000586963	1.26813	431	421	393	318	331	304
SPAC17H9.08	-0.312164	6.63164	-7.34018	0.00010634	0.000586993	0.867376	2685	2644	2451	2235	2241	2310
SPAC19B12.08	0.817392	5.12502	7.33704	0.000106647	0.000588179	1.02871	592	554	716	1122	1255	1154
SPAC1687.01	-0.415444	6.82727	-7.3255	0.000107783	0.000592902	0.847228	3344	3090	2816	2614	2411	2477
SPAC22G7.08	0.529375	5.457	7.32677	0.000107658	0.000592902	0.95473	894	790	893	1395	1307	1321
SPCC584.15c	0.908928	7.48707	7.32635	0.0001077	0.000592902	0.862058	2880	2752	3655	6098	6185	6467
SPBC1711.05	-0.615553	7.56839	-7.32281	0.00010805	0.000593342	0.846334	5862	6066	4711	4094	3617	3995
SPCC16C4.17	0.470535	5.07272	7.32297	0.000108035	0.000593342	1.01401	709	702	604	1060	979	984
SPBC8E4.02c	0.711734	6.26835	7.32148	0.000108183	0.000593559	0.870102	1280	1391	1585	2435	2485	2601
SPBP35G2.07	-0.509034	8.60338	-7.31993	0.000108337	0.000593894	0.975686	11870	11492	9468	8261	8110	8481
SPAC24B11.10c	-0.389725	6.84592	-7.3146	0.00010887	0.000596298	0.835683	3030	3219	3020	2455	2553	2659
SPAC1952.09c	0.401283	6.97484	7.3073	0.000109604	0.000599435	0.826034	2716	2592	2403	3440	3808	3787
SPAC3A11.05c	0.47757	5.31295	7.30703	0.000109631	0.000599435	0.955584	809	749	814	1143	1201	1232
SPBC1604.06c	-0.349947	7.47631	-7.30051	0.000110291	0.000602529	0.815699	4756	4889	4509	4159	3999	3875
SPBC16A3.13	0.399687	5.8256	7.29528	0.000110825	0.000604922	0.873181	1165	1158	1151	1568	1695	1706
SPBC646.06c	-0.372501	5.74877	-7.29229	0.000111131	0.00060595	0.873989	1455	1510	1344	1160	1210	1234
SPNCRNA.1348	1.18586	1.12434	7.29158	0.000111204	0.00060595	1.73261	40	30	31	82	91	77
SPAC25H1.03	1.08126	3.61148	7.28254	0.000112136	0.000610507	1.28228	219	238	145	439	489	431
SPBP8B7.10c	-0.461107	6.35048	-7.27989	0.00011241	0.000611476	0.818435	2335	2225	2179	1931	1689	1693
SPAC1F12.10c	0.701839	6.57149	7.27438	0.000112985	0.000613625	0.807331	1947	1918	1431	3141	3208	2911
SPAC688.03c	0.907526	4.19422	7.27425	0.000112998	0.000613625	1.15158	381	327	245	628	682	606
SPAC23D3.02	-0.398801	6.04871	-7.27145	0.00011329	0.000614112	0.827552	1913	1835	1613	1418	1485	1494
SPAP7G5.02c	-0.414704	9.42026	-7.27062	0.000113378	0.000614112	1.0593	19280	19271	17204	15156	15023	15070
SPBC21B10.12	0.49924	3.77139	7.27228	0.000113204	0.000614112	1.22693	288	271	249	412	415	410
SPAC6B12.07c	0.458269	8.08854	7.25609	0.000114912	0.000620974	0.828379	5403	5308	5632	7833	8416	8098
SPAC890.06	-0.395455	7.41014	-7.25694	0.000114822	0.000620974	0.770516	4766	4608	4362	3586	3700	4037
SPBC24C6.04	-0.52575	10.1623	-7.25586	0.000114937	0.000620974	1.14042	34692	33723	28708	24535	23704	24581
SPAPB24D3.10c	0.734311	5.5247	7.24797	0.00011578	0.000624997	0.871873	914	944	677	1418	1556	1562
SPNCRNA.1273	1.83247	2.49926	7.24625	0.000115965	0.000625463	1.49463	48	64	112	267	260	282
SPAC17A5.15c	-0.417541	9.60449	-7.242	0.000116422	0.000626867	1.05511	21874	21334	20144	16993	16775	17611
SPAC1F5.10	-0.680188	7.04048	-7.24281	0.000116336	0.000626867	0.759109	4404	4227	3207	2717	2670	2546
SPAC6B12.16	1.16676	1.36017	7.2294	0.000117792	0.000633703	1.64165	39	35	46	94	106	92
SPBC409.09c	0.546872	4.34623	7.2285	0.000117891	0.000633703	1.06483	407	432	348	614	648	613
SPAC56E4.05	-0.385198	6.81728	-7.22621	0.000118142	0.000634516	0.745796	3060	2994	3015	2621	2510	2398
SPBC409.05	0.43656	6.60247	7.22265	0.000118533	0.000636077	0.750483	2132	2036	1731	2924	2879	2819
SPAC30.02c	-0.315366	6.29466	-7.21762	0.000119089	0.000638523	0.756901	2091	2120	1954	1820	1776	1770
SPBC21C3.08c	-0.606129	10.3211	-7.21495	0.000119386	0.000639573	1.11863	39866	38821	32830	28254	24904	26001
SPCC830.02	0.778486	3.27463	7.20606	0.000120377	0.00064434	1.26473	209	159	155	318	330	318
SPAC4G9.20c	-0.480263	6.7506	-7.20401	0.000120607	0.000645028	0.725061	2892	2988	3072	2401	2382	2175
SPAPB24D3.06c	-0.364093	6.15899	-7.19523	0.000121598	0.000649235	0.741915	1947	2013	1753	1611	1628	1564
SPNCRNA.684	0.782677	2.89982	7.19605	0.000121505	0.000649235	1.32889	143	149	110	253	251	242
SPBP4H10.03	-0.55718	6.64801	-7.19269	0.000121886	0.000650228	0.717025	2778	2704	3093	2124	2057	2123
SPAC31A2.04c	0.350115	7.53586	7.18915	0.000122289	0.00065183	0.707088	4106	3918	3562	5490	5225	5266
SPBPB8B6.02c	2.33357	0.197827	7.18084	0.000123241	0.000656357	1.71065	8	10	19	64	77	55
SPBC27B12.03c	0.356344	7.31325	7.17031	0.000124459	0.00066229	0.682371	3504	3394	3013	4519	4702	4504
SPBC14C8.12	-0.489211	6.43457	-7.16855	0.000124664	0.000662825	0.700015	2641	2449	2146	1966	1855	1752
SPAC821.08c	1.07625	8.04547	7.16549	0.000125021	0.000663614	0.75546	4986	4901	3182	9591	9786	9877
SPAPB8E5.07c	-0.419305	8.38744	-7.16562	0.000125007	0.000663614	0.776972	8946	9050	9246	7168	7289	7643
SPNCRNA.1685	0.581185	4.24919	7.16345	0.000125261	0.000664331	1.01899	349	366	379	566	628	579
SPBC83.08	-0.327104	7.95446	-7.15671	0.000126053	0.000667974	0.700393	6801	6564	6200	5705	5445	5742
SPBC14F5.06	-0.374445	8.926	-7.15211	0.000126597	0.000670301	0.861427	13448	13193	12358	10847	10582	11156
SPNCRNA.973	-0.888986	2.32162	-7.14658	0.000127254	0.00067322	1.3867	169	149	160	83	106	91
SPNCRNA.1227	0.717485	4.76857	7.14521	0.000127418	0.000673526	0.896059	503	448	550	820	936	910
SPBC1703.08c	-0.413251	7.14957	-7.14049	0.000127983	0.000675948	0.650901	4132	3911	3512	3311	3006	3073
SPNCRNA.1294	0.750266	4.86929	7.13924	0.000128133	0.000676179	0.871127	497	495	601	923	1035	932
SPBP23A10.14c	0.747485	7.21487	7.13596	0.000128528	0.000677703	0.652487	2473	2608	3016	4519	4909	5278
SPBP23A10.07	-0.357158	8.63164	-7.13259	0.000128935	0.000679131	0.787808	10703	10630	10258	8839	8730	9165
SPNCRNA.121	-1.19112	1.70661	-7.13195	0.000129012	0.000679131	1.48832	135	114	99	66	48	51
SPBC19C2.03	-0.503217	6.94988	-7.12794	0.000129499	0.000681126	0.641478	3611	3662	3111	2869	2598	2467
SPCC63.14	0.743596	8.21715	7.12426	0.000129947	0.000682922	0.720496	5902	6000	4438	9088	10255	10051
SPCC1739.10	0.509894	8.17189	7.12056	0.000130399	0.000684731	0.701987	5407	5701	5905	8316	8947	9005
SPAC2G11.11c	-0.31266	6.56954	-7.11968	0.000130508	0.000684735	0.642627	2534	2491	2424	2198	2113	2188
SPAC869.05c	-1.0665	6.37606	-7.11752	0.000130772	0.000684994	0.656213	3450	2659	2442	1189	1716	1521
SPBC1683.01	0.882733	8.56648	7.11754	0.000130771	0.000684994	0.769765	6120	6018	7608	12503	13339	13469
SPAC1F12.06c	-0.512349	6.24578	-7.11437	0.000131161	0.000686464	0.653566	2057	2056	2272	1602	1648	1594
SPNCRNA.1434	-0.504906	4.06948	-7.11144	0.000131523	0.000687793	0.997821	454	481	472	363	353	357
SPAC2G11.05c	0.4262	5.19239	7.10884	0.000131845	0.000688006	0.771342	769	712	739	1056	1048	1128
SPBC16E9.10c	-0.377617	6.77751	-7.10849	0.000131889	0.000688006	0.624849	2894	3099	2813	2548	2414	2380
SPBC18H10.04c	-0.494835	9.98043	-7.1101	0.000131689	0.000688006	0.968195	27986	29562	26905	22716	21606	20629
SPAC23C4.07	-0.649993	4.83548	-7.10714	0.000132056	0.000688315	0.837734	950	854	725	627	546	568
SPAC30C2.04	-0.448637	9.21901	-7.10563	0.000132244	0.000688475	0.86059	16440	17093	15500	13701	12511	12720
SPBC17G9.03c	-0.418958	9.40745	-7.10515	0.000132303	0.000688475	0.887535	19644	18642	17073	15143	14589	15055
SPAPB24D3.03	-0.621537	5.37766	-7.1021	0.000132684	0.000689891	0.732021	1277	1357	1019	858	840	858
SPAC6G10.02c	-0.466623	6.90121	-7.10036	0.000132902	0.000690462	0.613727	3337	3097	3464	2572	2565	2616
SPBC106.09	0.842661	5.97382	7.09339	0.000133777	0.000694439	0.660609	1060	978	1289	1973	2259	2190
SPCC126.09	0.301101	7.40556	7.08942	0.000134279	0.000696478	0.599037	3770	3612	3377	4808	4722	4822
SPAC15E1.10	0.496737	4.77864	7.08662	0.000134634	0.00069718	0.82903	526	582	519	797	878	812
SPBC1773.15	-0.365449	5.85903	-7.08726	0.000134552	0.00069718	0.651774	1567	1507	1562	1295	1300	1303
SPBP8B7.14c	-0.329758	6.92282	-7.08358	0.00013502	0.000698611	0.595574	3276	3170	3127	2845	2732	2678
SPCC584.04	-0.404105	9.53686	-7.0825	0.000135158	0.000698756	0.881884	20295	20576	19283	16247	16201	16806
SPBP4H10.17c	0.327242	6.24795	7.07862	0.000135655	0.000700754	0.616364	1685	1613	1482	2186	2117	2189
SPBC691.04	-0.992922	6.69122	-7.07739	0.000135812	0.000700998	0.599514	3015	3157	4202	1895	1814	1876
SPAC24C9.15c	0.594085	4.10277	7.0746	0.00013617	0.00070217	0.957952	314	317	354	531	542	534
SPAC6F12.11c	0.37281	6.39171	7.0739	0.00013626	0.00070217	0.604346	1803	1815	1583	2344	2425	2520
SPBC1773.06c	0.488638	4.7121	7.07266	0.00013642	0.000702425	0.827696	540	541	477	747	844	779
SPBC2D10.11c	-0.356939	7.8772	-7.07059	0.000136686	0.000703227	0.60287	6428	6286	6016	5565	5177	5112
SPNCRNA.1214	-0.316602	6.58442	-7.06369	0.000137582	0.000707261	0.583715	2535	2582	2421	2124	2197	2237
SPAC977.11	-1.21922	1.99812	-7.05555	0.000138645	0.00071215	1.36267	143	136	149	87	57	58
SPAC2E1P3.01	0.589118	5.44111	7.05227	0.000139076	0.000713788	0.676108	797	834	863	1297	1493	1280
SPAC343.03	0.385949	5.41656	7.05097	0.000139247	0.000714091	0.672454	918	882	830	1300	1187	1238
SPBC1198.13c	0.406433	6.41285	7.04483	0.000140059	0.000717096	0.573229	1727	1693	1789	2428	2556	2496
SPBC16G5.02c	0.523797	6.13822	7.04497	0.000140041	0.000717096	0.589999	1489	1495	1173	2182	2140	2120
SPBC21C3.10c	-0.699238	4.54827	-7.04241	0.000140381	0.000718167	0.82936	726	782	600	501	476	426
SPAP8A3.04c	2.16416	8.69969	7.03654	0.000141165	0.000721597	0.73969	5309	6526	2825	22018	24255	20953
SPAPB2B4.01c	0.453249	5.68049	7.03288	0.000141655	0.000723428	0.618918	999	1014	1073	1572	1496	1506
SPBC12C2.01c	-0.332224	6.46175	-7.03217	0.00014175	0.000723428	0.555837	2425	2280	2257	2055	1942	1994
SPAC17A5.13	-0.693796	5.68657	-7.02894	0.000142185	0.000724881	0.61415	1478	1428	1719	1083	1016	989
SPAC4H3.16	-0.332966	5.55191	-7.02837	0.000142263	0.000724881	0.623691	1290	1230	1186	1034	1066	1087
SPAC1071.05	-0.550021	7.17064	-7.02627	0.000142546	0.000725741	0.532067	4024	3986	4262	2765	3060	3276
SPAC1142.06	-0.324438	8.051	-7.01842	0.000143613	0.000730334	0.567932	7269	6971	6658	6102	5830	6146
SPBC24C6.06	0.648067	5.99858	7.01795	0.000143678	0.000730334	0.574686	1128	1136	1343	1983	2109	2009
SPAC343.07	-0.487753	5.06341	-7.01469	0.000144123	0.000732012	0.694023	992	877	920	710	682	762
SPAC1834.05	-0.385609	7.31137	-7.01288	0.000144372	0.000732106	0.516186	4278	4141	4358	3524	3451	3624
SPBC119.08	0.325245	7.26167	7.01347	0.000144291	0.000732106	0.518394	3212	3236	3199	4356	4296	4447
SPNCRNA.1218	0.826082	2.71985	7.01149	0.000144563	0.000732489	1.17705	119	111	117	199	222	249
SPBC1348.11	1.58493	0.203779	7.00933	0.000144859	0.000733257	1.54612	13	14	19	52	55	44
SPCC1840.08c	-0.484604	6.00294	-7.00871	0.000144945	0.000733257	0.559011	1749	1716	1877	1424	1332	1378
SPAC30C2.02	-0.763037	7.48158	-7.00271	0.000145775	0.000736869	0.515005	5079	5073	6311	3656	3384	3433
SPAC17A5.09c	0.432377	6.24503	7.0008	0.00014604	0.000737038	0.535892	1574	1632	1397	2109	2363	2254
SPBC13E7.09	0.400749	6.64416	7.001	0.000146013	0.000737038	0.517842	2129	2075	1926	2780	2849	3147
SPBC947.05c	0.726671	3.53896	6.99848	0.000146363	0.000738081	0.99722	213	231	192	370	424	349
SPNCRNA.566	1.46546	1.2187	6.99555	0.000146772	0.000739557	1.43937	33	24	43	102	98	93
SPAP27G11.03	-0.351482	5.73138	-6.99146	0.000147345	0.00074093	0.563618	1416	1443	1364	1230	1146	1211
SPBC800.02	0.703206	2.90928	6.99111	0.000147394	0.00074093	1.11566	138	137	138	225	240	266
SPCC1450.01c	0.593338	3.58446	6.99187	0.000147288	0.00074093	0.9786	232	228	226	361	356	407
SPAC31A2.15c	-0.37741	6.3561	-6.98952	0.000147618	0.000741473	0.516185	2315	2175	2085	1923	1732	1830
SPAC8F11.08c	0.31658	7.74897	6.98685	0.000147995	0.000742192	0.506832	4553	4697	4322	6181	6164	5964
SPCC11E10.02c	0.371991	6.33228	6.98731	0.000147929	0.000742192	0.516402	1742	1683	1563	2196	2365	2435
SPCC895.09c	-0.385151	6.76051	-6.98587	0.000148133	0.000742299	0.496812	3093	2763	2872	2340	2412	2484
SPBC16C6.06	0.441683	7.195	6.98437	0.000148345	0.000742775	0.488902	2926	2974	2947	4011	4423	4609
SPAPB1A10.08	0.770572	6.12321	6.98085	0.000148843	0.000744685	0.527862	1126	1213	1438	2161	2370	2414
SPCC1450.09c	0.390273	5.84909	6.97384	0.000149842	0.000749093	0.537073	1138	1242	1165	1665	1710	1656
SPNCRNA.1416	0.537942	4.11831	6.9723	0.000150064	0.000749612	0.84708	349	367	300	537	549	510
SPAC1952.13	0.913001	7.00994	6.96143	0.00015163	0.000756842	0.471236	1990	2004	2683	4421	4569	4493
SPNCRNA.438	-0.491355	5.18589	-6.95349	0.000152786	0.000762011	0.606366	1019	1087	935	816	808	720
SPBC32H8.01c	-0.501187	3.64972	-6.949	0.000153444	0.000764231	0.916497	345	365	340	272	263	268
SPCC1919.01	0.460615	6.42129	6.94882	0.000153471	0.000764231	0.472228	1725	1662	1755	2638	2376	2661
SPAC1805.03c	-0.480792	4.11594	-6.93834	0.00015502	0.000770735	0.807359	517	459	466	373	379	366
SPNCRNA.1625	0.491607	5.23891	6.93901	0.000154919	0.000770735	0.58656	725	834	688	1107	1129	1179
SPCC162.10	0.814376	4.22476	6.93685	0.000155241	0.000771232	0.793753	311	306	380	587	687	617
SPAC23G3.02c	0.391044	7.28425	6.93282	0.000155842	0.000773011	0.433785	3240	3106	3234	4347	4525	4748
SPNCRNA.1655	-0.355752	6.29532	-6.93285	0.000155837	0.000773011	0.459349	2183	2128	1947	1811	1809	1677
SPNCRNA.1298	1.44023	2.25475	6.92936	0.00015636	0.000774974	1.20308	92	49	68	193	227	181
SPCC1442.12	0.321726	6.3735	6.92421	0.000157135	0.000778209	0.447191	1818	1758	1646	2406	2391	2273
SPBC29A3.10c	0.56141	7.27641	6.92259	0.000157379	0.000778813	0.425732	3347	3180	2519	4847	4853	4665
SPAC19E9.01c	0.308013	7.19826	6.9208	0.000157651	0.000779549	0.420243	3268	3025	3001	4152	4151	4157
SPNCRNA.1548	0.750132	4.70838	6.91578	0.000158412	0.000782706	0.669255	544	504	383	922	871	799
SPBPB2B2.02	0.62418	3.16157	6.91366	0.000158735	0.000783692	0.983177	185	169	153	269	278	300
SPNCRNA.1378	0.637129	5.32563	6.91201	0.000158987	0.000784328	0.548212	845	823	614	1278	1252	1287
SPAC2G11.14	0.486859	7.53685	6.90928	0.000159405	0.000785071	0.417163	3577	3551	3922	5460	5612	5694
SPAC977.02	3.99607	-2.25196	6.90819	0.000159573	0.000785071	1.21227	2	0	1	15	25	24
SPCC550.11	-0.41137	8.7852	-6.9078	0.000159631	0.000785071	0.58065	11834	11967	11992	9562	9468	10167
SPNCRNA.334	-0.979585	1.63806	-6.90926	0.000159408	0.000785071	1.27116	117	104	87	60	52	56
SPAC1F7.06	-0.704918	2.85653	-6.90576	0.000159946	0.000786009	1.03288	226	205	219	133	157	142
SPAC1486.03c	0.361574	7.00179	6.90328	0.000160327	0.000787276	0.404368	2796	2712	2459	3499	3749	3838
SPBC1703.02	-0.336528	7.26211	-6.89945	0.00016092	0.000789576	0.395924	4037	4153	3950	3541	3329	3551
SPNCRNA.236	0.851451	3.91191	6.89826	0.000161104	0.00078987	0.818995	284	306	207	543	475	527
SPAC13G7.07	-0.649506	4.58467	-6.89536	0.000161555	0.000790863	0.666479	722	646	751	506	506	449
SPAC227.19c	-0.585787	4.21322	-6.89587	0.000161475	0.000790863	0.743619	585	490	527	406	377	371
SPAC4H3.03c	0.540398	5.25078	6.89368	0.000161816	0.000791529	0.53769	715	734	774	1113	1127	1264
SPAC4D7.04c	-0.433155	6.89804	-6.8925	0.000162001	0.000791823	0.394631	3307	3104	3346	2720	2493	2618
SPBC646.09c	-0.439132	9.40006	-6.88874	0.000162588	0.000794082	0.659592	19348	19397	16756	14452	14515	15287
SPBC1773.02c	0.735846	6.38512	6.88666	0.000162915	0.000795072	0.411163	1460	1370	1754	2826	2754	2644
SPBC216.03	0.996089	6.07444	6.88421	0.0001633	0.000796339	0.435232	1334	1283	815	2418	2504	2347
SPCC622.13c	0.732878	4.67229	6.88297	0.000163495	0.000796676	0.641262	453	433	509	749	909	853
SPAC12G12.03	-0.798658	7.1531	-6.87709	0.000164425	0.00079937	0.376342	4283	3909	5097	2546	2828	2867
SPAC23C11.09	-0.376851	8.65135	-6.87724	0.000164402	0.00079937	0.52332	10979	10553	10708	8937	8721	9265
SPBC3H7.08c	1.03455	3.45112	6.87768	0.000164331	0.00079937	0.896309	214	204	130	391	424	381
SPCC1840.05c	0.357272	6.55982	6.87543	0.000164689	0.000800044	0.387502	2056	2058	1765	2676	2727	2740
SPAC1565.01	0.432443	8.27239	6.86726	0.000165993	0.000805763	0.448475	6146	6158	6424	8751	9379	9283
SPNCRNA.1450	-0.418584	4.96355	-6.86548	0.000166279	0.000806537	0.555115	842	843	853	715	673	669
SPBC337.02c	0.483549	5.97818	6.86369	0.000166567	0.000807319	0.409999	1212	1244	1297	1996	1914	1778
SPBC20F10.07	0.391534	6.98969	6.85871	0.000167371	0.000810595	0.357117	2607	2631	2570	3477	3705	3931
SPBC29A3.03c	0.732801	4.97763	6.85252	0.000168375	0.00081484	0.548736	524	559	644	976	995	1128
SPBC30B4.06c	-0.370616	6.57855	-6.84884	0.000168977	0.00081713	0.356754	2526	2545	2576	2196	2056	2159
SPBC3B8.09	-0.440289	8.56642	-6.84484	0.000169632	0.000819671	0.473094	10144	10193	10733	8488	8015	8335
SPBC3H7.03c	0.350367	8.5246	6.82681	0.000172623	0.000833491	0.447333	8035	7693	7246	10146	10709	10866
SPCC1840.04	0.354649	7.20928	6.80912	0.000175615	0.000847296	0.301297	3217	3225	2787	4180	4191	4393
SPAC1F8.01	1.55192	1.98862	6.80365	0.000176552	0.000851169	1.12673	59	71	37	147	206	170
SPAC18G6.15	-0.304799	7.21716	-6.80234	0.000176776	0.000851605	0.292249	3936	3909	3793	3442	3297	3472
SPAC4G8.13c	0.783308	7.7266	6.80131	0.000176954	0.000851817	0.323408	3529	3555	4329	6414	7473	7351
SPNCRNA.1092	-0.945398	2.01863	-6.8001	0.000177163	0.000852177	1.09015	130	143	122	72	87	64
SPAC25H1.06	-0.334677	6.78804	-6.79611	0.000177853	0.000853714	0.293682	3026	2942	2770	2466	2408	2635
SPBC18A7.01	0.306023	6.00075	6.79689	0.000177716	0.000853714	0.334298	1371	1349	1332	1821	1792	1815
SPCC737.02c	0.425603	9.03044	6.79592	0.000177885	0.000853714	0.503745	10969	11258	9610	15839	15337	15037
SPCC965.06	0.567648	6.62008	6.79115	0.000178714	0.000857044	0.296609	2008	1898	1785	2816	3481	2877
SPAC12B10.15c	0.625434	3.7657	6.78905	0.000179079	0.00085815	0.728133	245	265	260	402	418	469
SPBC11C11.01	0.438686	5.88903	6.78514	0.000179763	0.00086078	0.332942	1156	1198	1229	1844	1713	1705
SPNCRNA.1153	0.938704	4.49224	6.78314	0.000180113	0.000861807	0.577889	463	422	281	818	755	808
SPBC25H2.06c	-0.487005	7.42223	-6.78122	0.000180452	0.000862777	0.271615	5146	5115	4107	3828	3601	3621
SPBC3E7.10	-0.468587	7.27359	-6.77612	0.00018135	0.000866421	0.264618	4620	4565	3690	3381	3395	3255
SPNCRNA.1651	0.856381	1.83676	6.77377	0.000181767	0.000867762	1.09968	67	65	54	122	131	113
SPBC530.11c	0.412118	7.72708	6.77053	0.000182343	0.000869859	0.276871	4458	4418	4060	5700	6408	6565
SPNCRNA.14	0.552971	4.34325	6.75588	0.000184972	0.000881736	0.570434	394	414	371	568	640	670
SPBP35G2.04c	-0.55513	5.06556	-6.75466	0.000185193	0.000882129	0.417972	942	970	944	790	644	679
SPBC8D2.06	-0.375826	8.97564	-6.74936	0.000186156	0.00088539	0.444769	13985	13317	13068	11063	10959	11697
SPNCRNA.491	0.941137	1.53528	6.74981	0.000186073	0.00088539	1.12931	52	50	44	94	114	98
SPAC1296.06	0.346991	5.80975	6.74461	0.000187023	0.000888848	0.295271	1155	1202	1143	1650	1553	1621
SPAC12B10.16c	0.311083	6.84345	6.73987	0.000187894	0.000891674	0.232124	2420	2455	2380	3213	3342	3200
SPNCRNA.1399	-0.984641	1.64835	-6.73985	0.000187898	0.000891674	1.09536	119	105	87	61	52	56
SPAC343.08c	-0.493634	5.63924	-6.73907	0.000188042	0.000891693	0.306726	1485	1277	1407	1054	1024	1126
SPNCRNA.1097	-0.387096	5.30223	-6.73016	0.000189691	0.000898843	0.345227	1145	1010	1024	871	883	876
SPAC57A10.04	0.679175	2.91903	6.72802	0.000190089	0.000900058	0.837225	148	129	143	236	260	233
SPAC23D3.07	0.328202	7.59695	6.71785	0.000191996	0.00090841	0.210141	4314	4138	3729	5665	5446	5434
SPAC3G6.06c	-0.339372	5.71107	-6.71583	0.000192379	0.000909544	0.270828	1419	1432	1298	1234	1157	1161
SPNCRNA.1303	1.76438	-0.00467956	6.70897	0.000193679	0.000915009	1.26876	15	12	10	43	59	39
SPCC16A11.16c	0.312543	7.02923	6.69917	0.000195556	0.000921824	0.18402	2823	2887	2549	3738	3732	3631
SPCC794.07	-0.4078	9.51459	-6.69967	0.000195459	0.000921824	0.473033	20152	20463	18719	16430	15443	16578
SPNCRNA.1364	0.576136	2.81721	6.69929	0.000195532	0.000921824	0.824832	142	133	130	223	221	211
SPBC1A4.01	0.488182	3.57195	6.69732	0.000195913	0.000922457	0.667905	252	232	222	364	360	349
SPNCRNA.1122	1.69703	0.300063	6.69696	0.00019598	0.000922457	1.24036	17	13	17	69	45	56
SPAC22H12.03	0.479197	5.59189	6.69109	0.000197117	0.000927119	0.265965	1023	1038	826	1413	1494	1438
SPBP8B7.04	1.06648	3.87702	6.68786	0.000197746	0.000928704	0.607362	215	204	308	499	559	561
SPCC794.08	0.335608	7.39985	6.68786	0.000197746	0.000928704	0.171265	3721	3643	3234	4656	4963	4853
SPAPB15E9.01c	-0.822986	10.5212	-6.68593	0.000198123	0.000929102	0.589057	54254	46929	37938	25042	28763	30700
SPNCRNA.282	1.72756	0.975254	6.68609	0.00019809	0.000929102	1.1671	28	36	15	83	90	100
SPAC821.07c	-0.498666	6.98363	-6.68359	0.000198579	0.000930553	0.16776	3482	3323	3797	2715	2645	2759
SPAC4A8.16c	-0.397596	9.78127	-6.68241	0.000198811	0.000930958	0.489867	24368	24029	22709	18898	19576	20011
SPNCRNA.1244	-1.1315	2.59592	-6.68145	0.000198999	0.000931151	0.858518	181	204	250	99	112	99
SPNCRNA.824	-0.341306	5.79871	-6.66733	0.00020179	0.000943518	0.209261	1555	1495	1364	1289	1274	1209
SPBC18E5.15	0.576835	2.69592	6.66654	0.000201949	0.000943568	0.814169	125	126	121	197	200	205
SPNCRNA.214	0.705628	4.30032	6.66266	0.000202725	0.000946496	0.482116	390	319	380	683	657	581
SPAC6C3.02c	1.08364	8.31664	6.65722	0.000203817	0.000950897	0.250313	5876	6066	3809	11942	12525	10965
SPNCRNA.1443	-0.302104	6.46553	-6.65435	0.000204397	0.000952905	0.150743	2318	2327	2260	2054	1972	2043
SPCP20C8.02c	-0.639827	3.79686	-6.65055	0.000205166	0.000955787	0.569435	467	403	356	277	299	273
SPAC15A10.13	-0.495191	6.22867	-6.64766	0.000205753	0.000957823	0.156532	1957	2092	2225	1589	1621	1605
SPBC31F10.09c	-0.43515	5.72906	-6.64396	0.000206508	0.000960635	0.191483	1485	1380	1477	1230	1127	1123
SPAC23H4.06	-0.55074	7.64052	-6.6424	0.000206829	0.000961421	0.129772	5880	5187	5956	4539	4007	4049
SPNCRNA.812	0.984782	8.42093	6.63856	0.000207617	0.000964379	0.240853	6458	6653	4352	12404	13000	11395
SPNCRNA.1224	0.569963	3.75941	6.63464	0.000208425	0.000967429	0.562404	260	260	261	396	405	458
SPAC25G10.05c	-0.557972	9.07055	-6.63255	0.000208857	0.000968723	0.333644	16562	16708	12974	11677	10898	11211
SPBP8B7.31	-0.508516	5.15877	-6.62929	0.000209534	0.000971155	0.263216	1121	1000	888	795	774	717
SPAC22F3.02	0.568042	4.71171	6.62653	0.000210108	0.000973108	0.353514	493	471	554	790	811	829
SPAC17A2.05	0.41255	7.32121	6.62263	0.000210922	0.000975455	0.0997828	3260	3110	3390	4565	4692	4815
SPNCRNA.515	1.49673	0.269034	6.62324	0.000210795	0.000975455	1.167	18	20	12	46	59	49
SPBC1289.02c	0.389228	6.17615	6.62112	0.000211238	0.000976209	0.131569	1564	1562	1331	2077	2198	2039
SPAC14C4.10c	0.601342	4.70249	6.61421	0.000212693	0.00098222	0.342702	576	493	427	768	860	821
SPBC776.15c	0.298582	7.48725	6.60973	0.000213642	0.000985211	0.0872374	3846	3938	3608	4917	5068	5193
SPCC11E10.06c	-0.356981	5.78052	-6.60969	0.000213651	0.000985211	0.148108	1456	1523	1400	1297	1198	1210
SPBC17G9.09	-0.383483	9.04176	-6.60585	0.000214467	0.00098826	0.299851	14607	14250	13526	12246	11204	11763
SPCC16A11.09c	-0.376525	7.69401	-6.60236	0.000215214	0.000990983	0.0857351	5506	5883	5233	4831	4381	4658
SPCC63.13	1.23428	3.7635	6.59812	0.000216123	0.000993729	0.538766	154	214	272	493	556	536
SPNCRNA.277	-0.954434	1.5034	-6.59818	0.000216112	0.000993729	0.971752	90	87	100	56	50	48
SPCC364.04c	-0.431624	7.33539	-6.59491	0.000216816	0.000996194	0.0667824	4715	4679	3860	3682	3435	3491
SPAPB1E7.06c	0.447659	6.12238	6.59404	0.000217004	0.000996337	0.106063	1366	1426	1406	2056	1929	2228
SPAC1250.02	-0.562241	3.43918	-6.59292	0.000217246	0.000996706	0.580483	326	295	306	232	211	237
SPNCRNA.1216	0.630003	3.29174	6.59222	0.000217398	0.000996706	0.614281	184	171	199	313	313	301
SPAC24C9.08	0.52589	8.08819	6.58981	0.00021792	0.000996946	0.123014	5900	5582	4575	7940	8748	8227
SPCC191.07	0.420683	9.70361	6.59121	0.000217616	0.000996946	0.380936	17837	17615	15390	24185	24948	24427
SPNCRNA.738	0.787392	3.45618	6.59	0.000217879	0.000996946	0.581064	220	165	206	389	345	365
SPNCRNA.388	0.566826	5.88291	6.58591	0.000218769	0.00100011	0.119049	1061	1120	1239	1732	1828	1917
SPBC3B9.07c	-0.339753	6.29491	-6.58212	0.000219597	0.00100317	0.0801244	2181	2106	1935	1811	1828	1686
SPCC1183.11	0.492134	6.0486	6.58089	0.000219865	0.00100368	0.0976167	1470	1298	1174	1859	2012	2125
SPCC4B3.02c	0.532956	6.06089	6.57843	0.000220405	0.00100542	0.0944805	1267	1220	1428	2039	2021	2060
SPAC1071.12c	-0.466386	4.9909	-6.57484	0.000221198	0.00100831	0.235477	963	865	807	738	664	663
SPAC1D4.10	-0.288342	6.4994	-6.56931	0.000222422	0.00101317	0.0557682	2397	2350	2289	2039	2072	2132
SPAC6C3.04	0.750112	8.99658	6.56512	0.000223355	0.00101669	0.247327	10359	10233	7463	15904	17498	17104
SPAC3H1.07	-0.613403	9.28574	-6.5641	0.000223582	0.00101699	0.292267	19641	19794	15302	13747	12067	12702
SPCC757.09c	-0.633068	8.56786	-6.55848	0.00022484	0.00102199	0.163976	10825	10298	12189	7128	7912	8261
SPAC14C4.11	-0.366894	8.40252	-6.55152	0.000226412	0.00102839	0.122908	9048	8804	9183	7543	7457	7735
SPCC18B5.02c	0.92824	4.27319	6.55056	0.000226629	0.00102865	0.371563	402	363	241	695	647	696
SPAC57A10.08c	0.466973	4.51801	6.54825	0.000227153	0.00102958	0.306207	444	459	468	704	698	651
SPBC543.09	0.30791	8.14623	6.54823	0.000227158	0.00102958	0.0791482	6035	5980	5902	7860	8065	8118
SPAC17C9.06	0.354614	6.71189	6.54649	0.000227555	0.00103064	0.0244728	2137	2170	2217	3050	2942	3047
SPAC750.03c	2.76452	-1.68573	6.5402	0.000228991	0.00103574	1.04604	2	3	2	30	15	18
SPNCRNA.1237	0.867418	2.12546	6.54014	0.000229005	0.00103574	0.799072	81	86	61	147	143	159
SPCC1235.18	-0.990903	3.60899	-6.53101	0.00023111	0.00104451	0.484476	380	398	434	186	278	204
SPBC336.13c	0.73646	4.7454	6.52952	0.000231457	0.00104534	0.243949	565	522	390	940	892	815
SPAC23D3.05c	-0.366774	5.42692	-6.52431	0.00023267	0.00105007	0.0989509	1114	1170	1154	956	964	967
SPCP1E11.08	-0.336511	7.84094	-6.52318	0.000232934	0.00105051	0.00965908	6174	6067	5891	5473	4994	5105
SPBC947.14c	0.582553	5.36169	6.51999	0.000233681	0.00105314	0.11543	874	863	646	1279	1264	1297
SPAC23H3.10	-0.321069	6.80937	-6.51684	0.000234421	0.00105498	-0.0121276	2969	2913	2939	2633	2512	2508
SPCC1795.06	-0.403241	6.78277	-6.51727	0.000234319	0.00105498	-0.0108902	3067	3127	2731	2613	2396	2302
SPNCRNA.844	-0.452815	5.04639	-6.51238	0.000235474	0.00105897	0.155446	953	979	797	734	709	711
SPAC14C4.06c	0.483907	6.58593	6.51017	0.000235998	0.00106057	-0.0101862	1906	1774	2046	2832	2879	2951
SPAC17G8.04c	-0.46213	7.44035	-6.50807	0.000236495	0.00106206	-0.027418	5208	5097	4121	3871	3752	3662
SPAP27G11.02	0.387748	5.81742	6.50204	0.000237935	0.00106777	0.0292553	1254	1188	1036	1698	1628	1595
SPAPYUG7.05	-0.341722	8.15533	-6.49506	0.000239613	0.00107454	0.0176191	7661	7972	6989	6490	6215	6612
SPAC1B9.02c	0.294773	7.46236	6.49137	0.000240504	0.00107778	-0.044361	3727	3817	3662	4880	4934	5083
SPBC25D12.05	-0.458991	6.71006	-6.4903	0.000240763	0.00107818	-0.0384962	3093	3089	2497	2211	2223	2379
SPBC15D4.05	-0.379346	6.32743	-6.48758	0.000241424	0.00108038	-0.0262092	2163	2115	2167	1732	1901	1740
SPAC977.15	0.96989	4.53542	6.4853	0.00024198	0.0010821	0.245276	440	472	280	839	777	865
SPAC1F7.12	0.424694	6.64758	6.48324	0.000242484	0.00108283	-0.042975	2034	2180	1885	2823	3191	2857
SPBC1271.05c	0.909104	6.54783	6.48356	0.000242405	0.00108283	-0.0334479	1470	1419	1971	3018	3374	3393
SPBC649.02	-0.681284	7.86869	-6.48145	0.00024292	0.00108402	-0.0268868	7385	7707	5890	5327	4499	4301
SPAC1486.10	-0.604217	7.24134	-6.47984	0.000243316	0.00108441	-0.0590654	4199	4056	4918	3126	3081	3152
SPNCRNA.1166	1.23793	0.820923	6.4797	0.000243349	0.00108441	0.961838	26	31	23	64	62	81
SPBC800.06	-0.479635	7.95974	-6.47636	0.000244171	0.00108731	-0.0274166	7478	7287	6026	5724	5087	5278
SPNCRNA.934	-0.391455	4.66723	-6.47395	0.000244766	0.0010892	0.189622	685	688	674	539	566	586
SPNCRNA.1549	1.58653	-0.574877	6.46905	0.00024598	0.00109384	1.04781	10	9	7	29	34	25
SPCC1393.10	-0.797764	6.0157	-6.46831	0.000246163	0.00109389	-0.0233234	2383	2138	1570	1320	1183	1243
SPNCRNA.405	0.838628	2.40019	6.46616	0.000246699	0.0010955	0.663804	110	78	91	180	175	182
SPAC222.07c	0.457533	6.85994	6.46143	0.00024788	0.00109845	-0.0739151	2398	2470	2121	3626	3146	3631
SPBC14C8.07c	0.619526	6.53488	6.46173	0.000247805	0.00109845	-0.0607038	1932	1954	1429	2894	2838	3038
SPCC1739.15	0.451549	4.12952	6.46155	0.000247851	0.00109845	0.292555	352	380	322	511	531	518
SPAC1687.08	0.651769	3.19684	6.45559	0.000249348	0.00110418	0.484933	177	179	158	283	325	270
SPBC2D10.13	-0.404829	4.91544	-6.45415	0.00024971	0.00110502	0.116594	890	816	742	648	667	685
SPNCRNA.1213	0.424253	4.44153	6.43972	0.000253385	0.0011205	0.201596	461	468	393	639	643	637
SPBC32H8.07	0.413519	4.35958	6.43618	0.000254296	0.00112374	0.214798	419	444	389	584	615	607
SPNCRNA.1024	2.27482	-1.35389	6.43081	0.000255685	0.0011291	0.984886	4	2	6	21	22	21
SPBC56F2.08c	-0.705299	7.98634	-6.42853	0.000256276	0.00113092	-0.0715639	7133	6937	8827	4835	5139	5194
SPAC869.01	1.61658	-0.570498	6.42481	0.000257245	0.00113362	1.00468	11	7	8	26	29	34
SPBC725.14	0.291231	7.4386	6.42503	0.000257188	0.00113362	-0.119098	3783	3687	3568	4860	4727	5052
SPBC16A3.06	0.31892	5.89398	6.42172	0.000258053	0.0011364	-0.0687975	1340	1244	1167	1698	1719	1648
SPAC1687.11	-0.433162	8.47103	-6.42035	0.000258414	0.0011372	-0.00947732	9699	9230	10091	8021	7485	7803
SPBC557.03c	-0.292154	7.6741	-6.41846	0.000258909	0.00113859	-0.120474	5399	5559	4964	4753	4616	4706
SPBC19C7.11	0.310451	5.9991	6.41684	0.000259337	0.00113969	-0.0830527	1416	1352	1276	1744	1816	1873
SPBP35G2.03c	-0.409456	4.19216	-6.4115	0.000260747	0.00114509	0.219822	515	479	488	399	408	401
SPAC8C9.10c	-0.323812	6.26723	-6.40208	0.000263256	0.00115531	-0.118667	2129	1971	1967	1814	1740	1697
SPAC15A10.04c	-0.366458	8.46688	-6.39998	0.00026382	0.00115684	-0.0335334	9854	9600	8850	8186	7448	8149
SPBC409.21	-0.308588	6.51691	-6.39943	0.000263969	0.00115684	-0.134127	2417	2425	2330	2173	2015	2089
SPBC1105.09	0.299026	6.62966	6.39791	0.000264377	0.00115704	-0.138824	2079	2134	2069	2842	2771	2762
SPBC56F2.04	-0.330206	7.28555	-6.39827	0.000264279	0.00115704	-0.152725	4208	3999	4105	3430	3504	3681
SPAC1D4.13	0.311169	6.3548	6.39305	0.000265687	0.00116197	-0.132455	1739	1764	1668	2376	2358	2220
SPCC191.08	-0.291724	5.85673	-6.38838	0.000266954	0.00116671	-0.105568	1572	1478	1463	1324	1325	1344
SPBC17D1.05	-0.333198	8.71673	-6.38769	0.000267143	0.00116673	6.89016e-05	11383	11008	10843	9356	9384	9857
SPAC343.06c	0.365734	5.67852	6.3845	0.000268013	0.00116893	-0.0872889	1135	1105	943	1463	1479	1492
SPBC12C2.13c	-0.38824	5.78438	-6.38489	0.000267908	0.00116893	-0.10179	1472	1440	1526	1210	1266	1197
SPNCRNA.1113	-0.34122	6.05569	-6.38165	0.000268792	0.00117084	-0.128418	1848	1727	1696	1576	1498	1435
SPNCRNA.674	0.311711	6.35369	6.38155	0.000268819	0.00117084	-0.145338	1736	1762	1668	2375	2357	2218
SPNCRNA.1110	0.848606	4.81706	6.37949	0.000269384	0.0011725	0.065706	556	490	437	1019	1094	798
SPBC26H8.06	-0.356409	8.1602	-6.37816	0.00026975	0.00117329	-0.112149	8016	7884	6931	6710	6200	6375
SPBC887.05c	0.279172	6.76656	6.37201	0.00027145	0.00117987	-0.172454	2357	2319	2279	3089	2994	3063
SPAC27E2.06c	0.287959	6.01686	6.36865	0.000272383	0.0011829	-0.138856	1409	1421	1296	1797	1797	1862
SPBPB10D8.01	-0.984059	7.47003	-6.36816	0.000272518	0.0011829	-0.170823	7223	5889	4713	2672	3759	3269
SPAC24B11.13	-0.346585	7.71869	-6.36661	0.000272951	0.00118397	-0.175241	5565	5463	5686	4629	4741	4881
SPAC19G12.07c	0.314937	7.16271	6.36018	0.000274751	0.00119096	-0.193778	2992	3057	2991	3911	4144	4135
SPAC1006.08	0.574308	5.98802	6.34897	0.000277919	0.00120306	-0.154729	1281	1399	1011	1975	1953	1980
SPNCRNA.1505	0.558964	5.87218	6.34946	0.000277779	0.00120306	-0.143692	1066	1087	1253	1834	1732	1853
SPAC29B12.02c	-0.41815	7.36611	-6.34405	0.000279322	0.00120748	-0.213131	4334	4474	4615	3413	3695	3786
SPCC306.09c	0.390911	8.21634	6.34462	0.00027916	0.00120748	-0.135572	6100	6015	6159	8141	8759	9105
SPBC3B9.01	0.983665	7.62831	6.33735	0.000281246	0.00121498	-0.186977	3929	3789	2413	7389	6704	7145
SPAC637.12c	-0.266402	6.8853	-6.33618	0.000281583	0.0012156	-0.216393	3129	3115	2885	2686	2759	2775
SPNCRNA.1195	0.722789	4.19777	6.33475	0.000281998	0.00121657	0.142053	330	311	366	532	663	607
SPNCRNA.999	0.454332	6.0357	6.32766	0.000284055	0.00122461	-0.184736	1396	1440	1128	1956	1958	1943
SPAC17H9.18c	1.07958	1.19357	6.32555	0.000284671	0.00122644	0.741126	41	31	38	81	95	77
SPAC12B10.01c	0.565718	6.92582	6.32354	0.000285259	0.00122731	-0.230032	2263	2222	2562	3528	3719	4049
SPBC21C3.20c	0.494345	6.65171	6.32403	0.000285117	0.00122731	-0.22144	1916	1912	2142	2880	3083	3141
SPAC17H9.09c	-0.406187	5.63382	-6.31975	0.000286371	0.00123126	-0.1584	1428	1422	1185	1060	1132	1098
SPAC139.01c	-0.495689	7.78512	-6.31769	0.000286979	0.00123304	-0.223351	5945	5819	6693	4672	4712	4789
SPBC12C2.08	0.456526	7.4951	6.31459	0.000287894	0.00123536	-0.238677	3527	3517	3800	5065	5380	5688
SPCC16C4.06c	-0.30111	6.07	-6.31454	0.000287908	0.00123536	-0.205301	1783	1807	1660	1555	1578	1483
SPNCRNA.02	1.27407	0.340455	6.31141	0.000288836	0.00123768	0.840106	24	19	14	50	51	48
SPNCRNA.1211	0.279637	6.20075	6.31149	0.000288812	0.00123768	-0.216198	1637	1588	1476	2085	2014	2081
SPAC824.05	0.284034	6.0523	6.3062	0.000290389	0.00124349	-0.212187	1471	1385	1377	1858	1854	1871
SPAC9E9.15	0.455705	4.84722	6.30258	0.000291471	0.00124728	-0.036161	567	553	611	837	876	855
SPBC4F6.15c	-0.380395	4.93121	-6.30023	0.000292178	0.00124947	-0.0597849	834	845	771	716	680	644
SPNCRNA.1511	1.11115	2.22613	6.29498	0.000293762	0.0012554	0.519537	69	79	75	174	211	144
SPBC21B10.14	0.697331	4.03458	6.28728	0.000296101	0.00126454	0.122786	329	344	241	557	523	513
SPNCRNA.1480	1.23214	0.409366	6.28662	0.000296301	0.00126455	0.806638	20	17	23	49	48	57
SPNCRNA.814	0.689217	3.66797	6.28342	0.000297281	0.00126788	0.195497	271	231	205	419	445	370
SPNCRNA.17	1.36548	0.674602	6.28152	0.000297864	0.00126952	0.773987	19	21	30	66	58	70
SPNCRNA.1260	1.24269	1.03361	6.27967	0.000298432	0.00127109	0.720637	26	32	35	73	73	94
SPAC17A2.14	-0.45096	7.14621	-6.27622	0.000299497	0.00127477	-0.289066	3836	3686	4146	3016	3036	3189
SPAC1952.17c	0.394538	5.58507	6.27417	0.000300132	0.00127661	-0.19948	963	958	1027	1376	1406	1412
SPAC1556.01c	0.386137	6.42568	6.27276	0.000300569	0.00127762	-0.27154	1780	1678	1837	2447	2523	2523
SPNCRNA.835	0.999277	1.80788	6.27102	0.00030111	0.00127906	0.571471	74	57	45	120	131	126
SPAPB18E9.01	-0.357807	6.04186	-6.26947	0.000301594	0.00128026	-0.254479	1804	1665	1782	1494	1453	1490
SPAC1B3.09c	-0.278487	7.74513	-6.26294	0.000303634	0.00128806	-0.291419	5569	5677	5384	4968	4844	5046
SPAC8C9.16c	0.883615	5.17052	6.25644	0.000305681	0.00129495	-0.137747	579	531	785	1214	1258	1251
SPBC1685.08	0.340041	5.974	6.25585	0.000305869	0.00129495	-0.262878	1273	1389	1272	1836	1783	1773
SPBC29A3.11c	-0.68937	5.99027	-6.25585	0.000305868	0.00129495	-0.262696	2167	2077	1506	1230	1314	1275
SPAP27G11.04c	-0.402156	6.13702	-6.25124	0.000307331	0.00130028	-0.281346	2055	1944	1709	1640	1465	1568
SPBC646.12c	-0.278724	8.06697	-6.24955	0.000307869	0.00130169	-0.272734	7170	7111	6524	6220	6067	6280
SPBC8D2.07c	-0.437472	7.03468	-6.24587	0.000309044	0.00130579	-0.32197	3604	3445	3692	3050	2664	2890
SPAC683.02c	-0.412229	6.47708	-6.24039	0.000310803	0.00131235	-0.312215	2557	2604	2102	1956	1998	1935
SPAC16E8.08	-0.304568	5.31441	-6.23718	0.000311839	0.00131585	-0.206183	1076	1058	979	886	911	933
SPAC23C4.18c	-0.374463	7.07522	-6.23448	0.000312715	0.00131867	-0.335821	3679	3510	3617	2984	2847	3211
SPBC1711.15c	0.559437	3.45832	6.23293	0.000313217	0.00131991	0.180299	232	226	181	341	341	335
SPBC543.10	-0.292108	6.62886	-6.23195	0.000313537	0.00132038	-0.328284	2611	2537	2558	2228	2316	2276
SPNCRNA.274	-1.51033	-0.192546	-6.23122	0.000313773	0.00132051	0.796864	38	36	29	17	12	10
SPNCRNA.529	1.70384	2.49351	6.22786	0.00031487	0.00132424	0.417171	95	102	39	268	275	236
SPAPB8E5.05	1.65205	2.10339	6.22397	0.000316142	0.00132784	0.487077	48	41	92	187	215	177
SPBC1778.07	-0.386729	6.43384	-6.22432	0.000316029	0.00132784	-0.328807	2461	2479	2042	1951	1880	1935
SPAC3C7.08c	-0.570039	9.07077	-6.22136	0.000317003	0.00133057	-0.125619	14489	14737	16965	10917	11063	11718
SPBC27.06c	-0.434717	6.29632	-6.21921	0.000317709	0.00133199	-0.32751	2286	2232	1928	1848	1723	1593
SPBC36B7.05c	0.451009	4.717	6.21906	0.00031776	0.00133199	-0.104649	507	519	558	788	781	773
SPCC306.05c	0.296612	5.8389	6.21767	0.000318217	0.00133303	-0.295187	1259	1213	1163	1651	1554	1633
SPAC3F10.02c	-0.332332	6.20165	-6.2057	0.000322205	0.00134779	-0.337872	1938	1927	1946	1649	1614	1740
SPAC589.04	-0.342841	6.03168	-6.20602	0.000322095	0.00134779	-0.326367	1784	1691	1710	1501	1533	1398
SPBC839.11c	-0.278897	7.25527	-6.20518	0.000322377	0.00134779	-0.372266	4144	4005	3705	3537	3425	3617
SPCC1672.09	-0.301862	6.98275	-6.20293	0.000323133	0.00135007	-0.370343	3342	3248	3292	2841	2984	2863
SPAC9.10	-0.614217	5.78562	-6.20149	0.000323617	0.0013512	-0.307067	1858	1671	1319	1172	1148	1082
SPAC29E6.05c	0.282974	6.28029	6.19828	0.000324703	0.00135485	-0.350271	1739	1690	1535	2147	2169	2222
SPCC1183.07	-0.434402	8.57675	-6.19699	0.000325138	0.00135577	-0.242556	10511	9891	10840	8115	8154	8809
SPNCRNA.750	0.584017	4.79645	6.19578	0.000325549	0.0013566	-0.145169	526	512	560	770	910	920
SPCC338.14	-0.377172	9.11124	-6.19396	0.000326167	0.00135828	-0.150089	15541	15171	13714	12876	11788	12361
SPBC1685.05	0.491978	5.68319	6.18995	0.000327532	0.00136307	-0.305861	975	992	1086	1458	1639	1551
SPBC18H10.03	-0.337614	8.61805	-6.1887	0.00032796	0.00136372	-0.244681	10775	10690	9660	9165	8512	8986
SPBPB2B2.09c	-0.750829	6.6748	-6.18824	0.000328117	0.00136372	-0.377131	3527	3522	2417	2083	2022	1905
SPCC11E10.04	-0.383646	6.00447	-6.18574	0.000328973	0.00136639	-0.34729	1734	1652	1776	1482	1388	1416
SPNCRNA.1498	-0.473742	5.10912	-6.18372	0.000329666	0.00136837	-0.227108	968	891	1007	723	734	775
SPAC56F8.10	-0.367604	7.74097	-6.17714	0.000331937	0.00137651	-0.389375	5634	5562	5905	4854	4653	4861
SPBC1773.16c	-0.333961	5.24906	-6.17679	0.000332058	0.00137651	-0.263344	1009	996	999	848	843	891
SPAC4G9.19	0.677299	5.15738	6.1754	0.000332542	0.00137761	-0.235869	650	585	764	1203	1144	1092
SPBC21C3.03	-0.298608	5.78232	-6.172	0.000333723	0.00138079	-0.344753	1488	1394	1414	1267	1249	1267
SPCC1919.03c	0.317928	7.54683	6.17194	0.000333743	0.00138079	-0.40321	4057	4161	3591	5226	5463	5235
SPBC26H8.02c	0.289279	7.67281	6.16834	0.000335003	0.0013851	-0.401594	4326	4498	4171	5574	5882	5750
SPCC16C4.08c	-0.43785	7.06091	-6.15249	0.000340602	0.00140734	-0.429713	3808	3565	3567	3196	2661	2915
SPCC16C4.18c	0.32339	7.89823	6.14986	0.00034154	0.00141029	-0.403435	4991	5377	4665	6775	6729	6846
SPBC577.10	0.434634	7.93343	6.14494	0.000343304	0.00141423	-0.401668	5237	5347	4287	7433	7202	7039
SPBP8B7.18c	-0.297466	6.46872	-6.14442	0.000343494	0.00141423	-0.42268	2377	2310	2224	2056	1937	2102
SPNCRNA.1019	-0.359372	4.48024	-6.14411	0.000343605	0.00141423	-0.144451	615	606	558	483	507	512
SPNCRNA.112	-0.353929	5.93915	-6.14527	0.000343188	0.00141423	-0.389094	1783	1637	1474	1416	1365	1358
SPNCRNA.1120	1.75635	-0.0378333	6.14501	0.000343279	0.00141423	0.702557	17	14	7	43	42	51
SPCC777.14	-0.288739	5.49613	-6.14111	0.000344687	0.00141777	-0.345978	1222	1159	1130	1053	1022	1038
SPCC1795.12c	-0.479234	5.96288	-6.13728	0.000346074	0.00142255	-0.399284	1779	1657	1748	1475	1222	1342
SPCP1E11.03	0.37226	5.83644	6.13435	0.00034714	0.00142601	-0.389676	1200	1190	1144	1623	1558	1783
SPBC776.18c	-0.309605	6.55804	-6.13279	0.000347706	0.00142741	-0.439961	2508	2533	2344	2268	2087	2103
SPNCRNA.1339	0.9885	0.716923	6.12269	0.000351411	0.00144169	0.59066	24	30	27	57	60	58
SPAC1486.06	-0.264736	7.59524	-6.11952	0.000352586	0.00144558	-0.465877	5078	5057	4785	4500	4366	4590
SPAC3H1.01c	-0.310538	6.42875	-6.1147	0.000354375	0.00145198	-0.45521	2396	2202	2159	1900	1954	2047
SPBP8B7.12c	-0.517657	7.28314	-6.11037	0.000355995	0.00145768	-0.480053	4811	4715	3683	3484	3147	3303
SPAC9G1.07	0.272058	6.13538	6.10773	0.000356985	0.00146079	-0.445849	1558	1528	1418	1930	1944	2017
SPAC23G3.03	0.334375	6.2818	6.10708	0.000357229	0.00146085	-0.455222	1620	1684	1573	2110	2340	2217
SPAC3H8.04	0.31947	6.08825	6.10442	0.000358228	0.00146399	-0.446115	1527	1467	1300	1879	1939	1979
SPCC18.12c	-0.510141	6.13377	-6.09977	0.000359987	0.00147024	-0.455077	2091	2188	1658	1546	1466	1476
SPBC1652.02	-0.545453	6.63632	-6.08656	0.000365036	0.0014899	-0.494994	2711	2657	3110	2060	2010	2213
SPNCRNA.1054	1.13685	1.81041	6.08403	0.000366011	0.00149292	0.367228	53	71	44	135	149	114
SPBC887.11	-0.345357	5.23787	-6.08238	0.000366649	0.00149457	-0.370295	1030	1035	930	886	808	860
SPAC3G9.06	-0.3998	8.55451	-6.08137	0.000367039	0.0014952	-0.380503	10502	11035	8982	8501	8146	8308
SPAC1420.02c	-0.334754	8.6599	-6.07695	0.000368753	0.00150122	-0.365713	11287	11078	9684	9256	9106	9096
SPCC1840.11	-0.290445	7.31761	-6.07597	0.000369138	0.00150182	-0.521849	4198	4369	3863	3758	3613	3630
SPAC1782.11	-0.536509	7.3191	-6.0724	0.000370531	0.00150503	-0.523914	5024	4826	3787	3595	3315	3211
SPAP27G11.13c	-0.598736	6.92386	-6.07213	0.000370636	0.00150503	-0.520005	3917	3867	2841	2514	2578	2434
SPCC794.02	-0.615721	3.5908	-6.07316	0.000370233	0.00150503	-0.0326802	330	352	368	230	241	271
SPBC36.13	0.842878	1.77609	6.07031	0.00037135	0.00150697	0.349495	65	61	53	102	122	126
SPAC23G3.04	-0.411213	5.0142	-6.0686	0.000372024	0.00150874	-0.342278	875	866	881	764	699	675
SPAC1687.03c	-0.351297	6.29235	-6.06695	0.000372673	0.00151041	-0.503546	2193	2163	1886	1828	1795	1672
SPCC74.03c	0.338982	7.9178	6.06311	0.000374189	0.00151558	-0.501349	5088	4876	5169	6854	6905	6984
SPBC2G2.05	-0.274001	6.84772	-6.05638	0.000376862	0.00152544	-0.537164	3153	3025	2748	2658	2647	2682
SPCC4B3.20	-0.493545	3.19482	-6.05147	0.000378828	0.00153145	0.0241183	271	243	250	195	194	198
SPCC613.03	-0.285499	6.77006	-6.05174	0.000378717	0.00153145	-0.540778	3014	2869	2610	2473	2562	2504
SPAPB8E5.06c	-0.650217	8.64359	-6.04687	0.000380676	0.00153794	-0.402062	12861	13429	9427	8528	7748	8063
SPBC30D10.13c	-0.417911	8.53701	-6.04615	0.000380968	0.00153814	-0.424719	10930	10351	9041	8733	7947	7844
SPBC16A3.03c	-0.355831	6.95283	-6.04431	0.000381711	0.00153919	-0.553507	3306	3158	3402	2727	2780	2844
SPBC887.03c	-0.483947	6.70026	-6.0445	0.000381634	0.00153919	-0.546581	2780	2740	3151	2214	2236	2254
SPCC970.02	-0.366709	5.6037	-6.04062	0.000383207	0.00154424	-0.476354	1341	1391	1163	1096	1115	1055
SPAC1A6.03c	0.306058	8.45307	6.03936	0.000383719	0.00154533	-0.447294	7675	7547	6978	9555	9875	10298
SPAC1296.03c	0.411866	5.24878	6.03556	0.00038527	0.00155059	-0.421545	787	855	685	1128	1091	1126
SPAC6G9.10c	-0.327999	7.07786	-6.03355	0.000386091	0.00155291	-0.568524	3691	3515	3449	2905	3037	3263
SPBC1A4.09	-0.295352	7.56036	-6.03013	0.000387494	0.00155757	-0.57107	5064	4833	4820	4319	4174	4507
SPAC222.13c	0.334614	6.69031	6.02858	0.000388134	0.00155916	-0.564393	2134	2131	2207	2912	3037	2895
SPAC8F11.07c	-0.35889	5.44791	-6.02459	0.000389784	0.00156381	-0.473232	1233	1194	1057	1001	927	1013
SPNCRNA.1090	-0.463626	3.60841	-6.0248	0.000389696	0.00156381	-0.0939308	362	346	301	264	263	264
SPAC13D6.01	0.655777	3.74217	6.02365	0.000390171	0.00156438	-0.118089	284	270	202	415	451	416
SPAC1F7.03	0.321892	7.46511	6.01811	0.000392474	0.00157262	-0.584401	3886	3610	3631	4748	5159	5169
SPBC1604.14c	-0.373237	6.41678	-6.01646	0.000393164	0.00157439	-0.568964	2280	2214	2350	1812	1942	1973
SPAC1F12.09	0.252958	6.4952	6.01554	0.000393549	0.00157494	-0.572911	1977	1968	1871	2462	2515	2532
SPCC2H8.04	-0.438409	4.52387	-6.01195	0.000395054	0.00157997	-0.30621	651	630	603	548	494	467
SPAC637.10c	0.424162	6.68576	6.00362	0.000398573	0.00159304	-0.592867	2293	2200	1794	3101	2975	3020
SPAC29B12.13	0.504204	4.3065	6.00036	0.000399958	0.00159757	-0.269186	439	400	335	609	614	575
SPAPB17E12.06	-0.346325	5.27867	-5.99943	0.000400355	0.00159815	-0.474487	1005	1043	1032	882	848	894
SPNCRNA.1228	0.345806	5.50912	5.99675	0.000401503	0.00160173	-0.510897	981	1011	856	1280	1345	1291
SPAC4G9.14	-0.381609	5.52462	-5.99574	0.000401933	0.00160244	-0.518281	1280	1233	1185	1067	1073	940
SPAC11H11.06	0.337619	8.36499	5.99436	0.000402527	0.0016038	-0.515354	7352	7025	6309	9474	9750	9046
SPBC16E9.17c	0.755731	2.3019	5.99285	0.000403172	0.00160537	0.152537	100	91	76	146	171	172
SPAC13G6.14	-0.38793	6.41724	-5.98997	0.000404416	0.00160931	-0.600004	2333	2200	2349	1799	2013	1890
SPAC644.08	0.427699	5.69319	5.98535	0.000406412	0.00161624	-0.546477	1152	973	1021	1603	1531	1445
SPAC212.10	3.98121	-1.73389	5.98429	0.000406874	0.00161707	0.51022	1	1	2	17	50	31
SPBC25H2.09	0.399748	6.31474	5.98316	0.000407364	0.00161801	-0.601213	1756	1698	1439	2459	2299	2221
SPAC6F6.12	0.328906	6.88295	5.97887	0.000409234	0.00162423	-0.628329	2542	2360	2512	3416	3376	3295
SPAC922.09	1.01889	0.307779	5.97839	0.000409442	0.00162423	0.484675	22	21	17	45	44	44
SPAC2G11.02	-0.735472	6.53145	-5.97709	0.00041001	0.00162547	-0.617366	2683	2462	3323	1814	1786	1866
SPAC17A2.04c	-0.318074	6.07875	-5.97414	0.000411306	0.00162959	-0.599204	1888	1838	1597	1553	1516	1547
SPCC576.01c	0.398517	5.63955	5.9731	0.000411762	0.00163038	-0.555043	1017	1037	1001	1437	1576	1358
SPNCRNA.1252	0.421672	6.03615	5.96802	0.000414004	0.00163824	-0.600635	1293	1297	1403	1837	2012	1944
SPAC19G12.11	0.292783	6.84887	5.96399	0.000415794	0.00164347	-0.64515	2565	2544	2233	3314	3225	3191
SPBC14C8.04	-0.467071	8.85982	-5.96388	0.000415842	0.00164347	-0.460488	13558	14089	11031	10411	9898	9819
SPBC1271.11	-0.283979	5.45061	-5.95928	0.000417896	0.00165056	-0.551443	1135	1170	1091	996	1006	1019
SPBC24C6.09c	0.526947	5.83913	5.95764	0.00041863	0.00165243	-0.593253	1053	1075	1238	1782	1669	1787
SPAC17H9.10c	-0.31956	7.15879	-5.95646	0.00041916	0.0016528	-0.660435	3759	3643	3833	3233	3221	3300
SPAC1B3.13	-0.548515	8.11436	-5.95568	0.000419508	0.0016528	-0.602319	7690	7235	8710	5860	5533	6110
SPAC6F12.15c	0.385696	5.96003	5.95511	0.000419764	0.0016528	-0.610152	1246	1259	1329	1841	1729	1856
SPCC1795.05c	-0.425466	6.67834	-5.95518	0.000419731	0.0016528	-0.651059	2911	2951	2511	2447	2212	2094
SPAC8F11.06	-0.626535	4.95886	-5.95332	0.000420569	0.00165495	-0.463023	1045	960	739	616	656	638
SPAC16A10.01	0.970556	6.13289	5.9519	0.000421208	0.00165542	-0.616628	1096	990	1502	2256	2723	2525
SPNCRNA.50	1.02199	0.401807	5.95223	0.000421061	0.00165542	0.445239	22	19	23	46	48	48
SPCC290.04	0.342475	6.27368	5.94802	0.000422966	0.0016613	-0.640912	1609	1568	1659	2152	2265	2226
SPAC323.02c	0.32262	8.11769	5.94562	0.000424053	0.00166454	-0.61336	5833	5976	5672	8304	7877	7527
SPCC1183.05c	0.337386	6.50543	5.94059	0.000426348	0.00167252	-0.660882	1885	1847	1957	2593	2631	2562
SPBC1718.06	0.361046	7.46886	5.93862	0.000427251	0.00167502	-0.677193	3690	3532	3782	4889	5266	5162
SPAC3A12.16c	-0.417315	7.06386	-5.93798	0.000427546	0.00167515	-0.680525	3940	3731	3244	3003	3120	2720
SPAC17G8.11c	0.47406	5.72679	5.93622	0.000428354	0.00167728	-0.607203	1011	1014	1143	1515	1630	1613
SPBC27.03	0.428149	3.97169	5.93035	0.000431059	0.00168683	-0.28039	328	323	300	439	491	458
SPBC646.11	-0.266938	7.77331	-5.92759	0.000432342	0.00169081	-0.679157	5840	5811	5257	5158	4956	5096
SPAC6F12.10c	-0.392358	9.23681	-5.92373	0.000434136	0.0016947	-0.444533	16764	15403	16496	13166	13181	13835
SPBC2G2.06c	-0.257733	6.91451	-5.92399	0.000434017	0.0016947	-0.694348	3265	3136	2892	2809	2771	2833
SPCC1620.12c	0.285773	7.35845	5.92419	0.000433924	0.0016947	-0.698266	3532	3488	3439	4445	4586	4792
SPNCRNA.499	1.29888	0.504209	5.91694	0.000437317	0.00170607	0.398764	26	20	17	50	52	68
SPBC646.10c	-0.35275	9.41421	-5.91355	0.000438915	0.00171126	-0.430059	18371	18796	17134	15898	14851	15311
SPAC29A4.05	0.286877	7.40932	5.91264	0.000439347	0.00171189	-0.710746	3815	3717	3317	4896	4758	4667
SPAPB17E12.07c	-0.330694	4.94423	-5.90946	0.000440852	0.0017158	-0.515361	803	824	802	712	681	699
SPCP31B10.07	-0.276642	8.26489	-5.90938	0.000440889	0.0017158	-0.637278	8310	8128	7418	7099	6982	7230
SPAC4F10.04	-0.303946	5.64462	-5.90856	0.000441281	0.00171627	-0.637842	1349	1373	1195	1158	1148	1127
SPNCRNA.210	-0.828185	2.16754	-5.90513	0.00044291	0.00172156	0.0752936	150	147	124	90	97	71
SPAC821.03c	-0.350608	7.69088	-5.90408	0.000443415	0.00172247	-0.712549	5543	5868	5041	4563	4471	4931
SPBC2F12.12c	0.293856	6.31255	5.90305	0.000443905	0.00172332	-0.696603	1674	1686	1691	2278	2197	2235
SPBC11B10.09	-0.289492	6.85425	-5.89732	0.000446654	0.00173082	-0.724597	3161	3043	2807	2759	2669	2556
SPBC25B2.11	0.323963	5.49298	5.89763	0.000446507	0.00173082	-0.625908	1026	911	899	1255	1290	1297
SPNCRNA.1458	-0.418265	4.66827	-5.89743	0.000446601	0.00173082	-0.471394	740	702	629	546	531	602
SPAC1D4.08	-0.249983	7.7804	-5.89239	0.000449036	0.00173899	-0.720506	5835	5755	5297	5052	5172	5150
SPAC16.01	0.317839	5.92372	5.88534	0.000452467	0.00175121	-0.690617	1320	1346	1166	1682	1696	1792
SPAC1039.03	-0.309128	6.40595	-5.88462	0.000452815	0.00175149	-0.724332	2298	2355	2004	1926	1930	1953
SPBC21C3.15c	-0.281991	8.13919	-5.87997	0.000455095	0.00175924	-0.693029	7479	7263	7136	6500	6301	6705
SPAC6B12.04c	-0.292624	6.14258	-5.87161	0.00045923	0.00177414	-0.72488	1946	1846	1716	1669	1639	1561
SPNCRNA.1313	-1.6506	0.283924	-5.86861	0.000460719	0.00177882	0.372868	63	55	36	21	13	18
SPBC1105.06	-0.365584	5.81394	-5.86542	0.000462313	0.00178389	-0.706356	1586	1556	1360	1335	1258	1190
SPBC106.06	-0.284994	7.7315	-5.85946	0.000465307	0.00179435	-0.763111	5739	5624	5163	5008	4675	5006
SPBC25B2.06c	-0.339967	6.4846	-5.85827	0.000465904	0.00179557	-0.759232	2472	2519	2118	2090	1974	2007
SPAC1565.08	-0.460235	9.59318	-5.85451	0.000467803	0.00179961	-0.474715	22951	22811	18358	16473	16517	17217
SPAC15E1.08	-0.408459	6.46913	-5.85542	0.000467345	0.00179961	-0.761644	2545	2497	2158	2118	1820	1937
SPAC22A12.03c	-0.405442	5.58394	-5.85473	0.000467694	0.00179961	-0.692662	1404	1333	1158	1137	1014	1031
SPBC56F2.09c	-0.342184	8.70357	-5.85324	0.000468452	0.00180102	-0.620627	11813	11215	10085	9019	9654	9569
SPBC428.19c	-0.287278	7.51554	-5.85161	0.000469276	0.0018031	-0.783866	4815	4970	4454	4231	4052	4353
SPBC19C7.09c	-0.271919	6.42654	-5.84861	0.000470808	0.00180789	-0.768335	2287	2175	2190	1956	2031	1982
SPNCRNA.577	-0.541631	6.58029	-5.84143	0.000474486	0.00182091	-0.781928	2604	2543	2999	1977	1928	2148
SPAC144.14	0.44596	5.79587	5.84032	0.00047506	0.00182202	-0.729662	1239	1167	960	1583	1630	1737
SPNCRNA.222	2.55234	-2.1612	5.8383	0.000476103	0.00182492	0.365093	1	4	1	15	13	12
SPBC83.01	0.304915	8.96688	5.83725	0.000476644	0.00182589	-0.591494	10629	10811	10246	14251	13922	14247
SPNCRNA.878	-0.305699	6.69378	-5.83539	0.00047761	0.00182849	-0.794313	2848	2830	2440	2400	2315	2386
SPAC26F1.13c	-0.341193	9.04014	-5.83206	0.000479341	0.00183401	-0.585025	14393	14198	13142	11483	11669	12542
SPAC13F5.06c	0.303238	6.52091	5.81672	0.0004874	0.00186373	-0.809202	1927	1939	1951	2546	2543	2691
SPAC23C4.06c	-0.433459	5.43186	-5.8155	0.000488049	0.00186397	-0.716951	1308	1186	1048	1012	900	924
SPCC1259.11c	-0.376598	7.45541	-5.81572	0.000487932	0.00186397	-0.827442	4786	4395	4905	3884	3879	3985
SPBC13A2.04c	-0.370151	7.01666	-5.80995	0.000491005	0.00187413	-0.832253	3779	3239	3363	2761	3000	2929
SPAC22H10.03c	0.329983	7.39151	5.80903	0.000491496	0.00187488	-0.833954	3534	3452	3553	4554	4795	5017
SPAC25B8.10	0.294452	6.64382	5.80653	0.000492838	0.00187887	-0.82626	2211	2139	2008	2661	2918	2872
SPNCRNA.960	0.51023	4.09026	5.8021	0.000495224	0.00188684	-0.456484	330	317	358	487	541	521
SPAC17G6.03	0.409525	5.63483	5.79948	0.000496642	0.00188928	-0.760526	1010	979	1046	1365	1452	1553
SPAC1805.14	-0.282256	6.67765	-5.79941	0.00049668	0.00188928	-0.837007	2729	2758	2466	2394	2269	2418
SPNCRNA.938	0.585487	2.63682	5.79926	0.000496757	0.00188928	-0.147573	118	132	107	201	192	187
SPBC337.04	0.393059	5.95568	5.79799	0.000497446	0.00189077	-0.796615	1387	1322	1116	1799	1733	1896
SPAC18G6.13	0.50288	3.32518	5.79482	0.00049917	0.00189619	-0.300554	191	213	188	304	288	317
SPBC119.07	0.57218	6.41709	5.79165	0.000500902	0.0019005	-0.832241	1585	1523	1841	2457	2702	2795
SPNCRNA.790	-0.428991	3.90345	-5.79217	0.000500619	0.0019005	-0.432003	438	416	369	334	313	336
SPBC106.15	-0.303708	7.43942	-5.7907	0.000501419	0.00190132	-0.858736	4662	4808	4129	4092	3896	3928
SPAC3G9.15c	-0.26739	7.20591	-5.78652	0.000503714	0.00190889	-0.863665	3936	3842	3626	3555	3305	3406
SPAPB1A10.05	0.701578	5.75849	5.78237	0.000506	0.00191641	-0.787868	897	925	1193	1781	1696	1781
SPBPB7E8.01	-0.640396	7.50549	-5.78078	0.000506883	0.00191861	-0.86317	5365	4608	6088	3640	3851	3616
SPAC4G8.06c	-0.32976	6.95567	-5.77846	0.000508169	0.00192119	-0.868908	3454	3389	2970	2656	2875	2919
SPCC1235.12c	0.830769	1.73875	5.77857	0.000508109	0.00192119	0.0219557	65	49	62	117	114	107
SPBC4F6.18c	-0.384389	10.3265	-5.77545	0.000509844	0.00192638	-0.472258	36713	34746	31966	29368	28151	28196
SPAC3C7.12	0.288356	6.4846	5.77467	0.000510277	0.00192687	-0.858366	1952	2003	1755	2522	2443	2583
SPBC776.10c	-0.29893	7.0215	-5.77377	0.000510779	0.00192762	-0.875881	3496	3264	3384	2988	2888	3058
SPBC19C7.08c	-0.306801	6.1258	-5.77009	0.000512843	0.00193312	-0.845304	1803	1851	1811	1578	1544	1667
SPCC1906.03	0.655975	2.4543	5.77026	0.000512748	0.00193312	-0.141429	105	105	96	155	183	187
SPBC3B9.06c	0.366326	5.47946	5.75888	0.000519173	0.00195582	-0.788747	985	890	892	1367	1281	1218
SPNCRNA.1455	0.768115	2.6634	5.7514	0.000523448	0.00197076	-0.205087	123	134	88	209	212	209
SPBC4.07c	0.270248	8.2732	5.74834	0.000525207	0.00197621	-0.825501	6814	6761	6264	8838	8393	8683
SPCC663.10	-0.2537	6.90118	-5.74705	0.000525954	0.00197785	-0.905702	3107	3180	2903	2717	2805	2826
SPBC16E9.19	-0.302385	5.1966	-5.74327	0.00052814	0.0019849	-0.76434	974	995	898	810	847	861
SPBC776.04	-0.295156	6.79637	-5.74202	0.000528863	0.0019863	-0.909333	2930	2814	2921	2536	2504	2612
SPCC1620.03	0.421109	4.7085	5.74155	0.000529138	0.0019863	-0.663361	578	548	468	733	767	809
SPNCRNA.1615	-0.340935	5.16422	-5.7364	0.000532134	0.00199637	-0.766173	983	982	877	844	764	823
SPBC8D2.13	-0.248926	6.67354	-5.73586	0.000532453	0.00199638	-0.913562	2625	2711	2498	2390	2368	2382
SPAC4G9.06c	-0.287836	6.33761	-5.73335	0.000533923	0.00200072	-0.902323	2113	2063	2112	1835	1843	1903
SPBC17D1.03c	-0.387315	6.29837	-5.7322	0.000534598	0.00200207	-0.90127	2357	2161	1846	1774	1743	1731
SPBC2G5.04c	-0.289117	5.97316	-5.73119	0.00053519	0.00200311	-0.881637	1749	1623	1521	1480	1404	1450
SPBC1E8.04	1.12143	1.03647	5.72838	0.000536845	0.00200694	0.10315	42	34	23	74	81	75
SPNCRNA.1448	-0.422695	8.75491	-5.72855	0.000536746	0.00200694	-0.760304	12658	12557	10178	9112	9539	9801
SPCC663.02	0.375165	6.2738	5.72621	0.000538127	0.00200937	-0.905793	1585	1519	1681	2201	2244	2273
SPNCRNA.586	-0.33453	5.04004	-5.72652	0.000537948	0.00200937	-0.753559	913	888	801	708	753	774
SPBC215.08c	-0.313063	9.13229	-5.72549	0.000538555	0.00200978	-0.697576	15087	14648	14289	12414	13037	12956
SPNCRNA.942	0.865752	2.84163	5.72096	0.00054125	0.00201866	-0.27663	141	131	103	265	272	206
SPBC8D2.14c	-0.247452	6.67503	-5.71865	0.000542622	0.00202259	-0.934438	2627	2711	2500	2391	2374	2386
SPAC4G8.11c	0.298544	4.90125	5.71468	0.000545004	0.00203027	-0.737412	663	624	609	847	846	833
SPNCRNA.974	0.880814	2.39898	5.71143	0.000546955	0.00203635	-0.193069	99	77	98	178	208	161
SPBC18H10.15	-0.355486	6.05128	-5.70949	0.000548127	0.00203833	-0.913475	1694	1786	1800	1546	1441	1484
SPBC530.12c	-0.245541	6.95572	-5.70971	0.000547994	0.00203833	-0.952013	3348	3133	3037	2892	2896	2905
SPCP31B10.03c	0.26337	5.99795	5.7077	0.000549208	0.00204116	-0.910514	1375	1402	1328	1757	1754	1828
SPCC16C4.22	-0.400681	4.3225	-5.70243	0.000552408	0.00205185	-0.631343	584	512	523	455	428	444
SPCC320.05	0.592661	6.31163	5.69793	0.000555158	0.00205845	-0.939923	1651	1696	1245	2276	2486	2696
SPNCRNA.707	0.466073	3.45426	5.6987	0.000554687	0.00205845	-0.443586	222	218	215	310	322	350
SPNCRNA.842	-0.335036	4.57874	-5.69805	0.000555085	0.00205845	-0.69166	664	631	594	544	521	557
SPAC8C9.11	-0.287132	6.7625	-5.69676	0.000555878	0.00205992	-0.963379	2928	2832	2684	2635	2459	2406
SPAC922.07c	-0.495915	4.4348	-5.69411	0.000557503	0.00206474	-0.664565	688	606	522	455	480	454
SPBC36.06c	-0.283479	6.01249	-5.69308	0.00055814	0.0020659	-0.930946	1717	1638	1657	1529	1446	1487
SPAC3H1.08c	0.359298	4.72027	5.69202	0.00055879	0.0020671	-0.726453	581	567	492	780	736	761
SPBC685.09	-0.311802	6.9568	-5.68873	0.000560828	0.00207343	-0.977482	3455	3207	3087	2996	2696	2818
SPNCRNA.348	1.39371	-0.793484	5.68519	0.000563021	0.00208033	0.250292	8	10	6	25	22	23
SPNCRNA.1314	-1.46548	-1.2469	-5.68391	0.000563823	0.00208208	0.25756	16	18	14	5	6	7
SPBC18E5.01	-0.348247	7.60324	-5.6823	0.000564827	0.00208458	-0.9838	5535	5450	4520	4355	4431	4354
SPNCRNA.1678	-0.272809	7.35735	-5.67759	0.000567772	0.00209424	-0.996298	4434	4312	3952	3869	3631	3881
SPBC646.17c	0.780158	3.21755	5.67644	0.000568494	0.00209568	-0.413597	147	158	198	308	331	289
SPBC21B10.10	-0.556603	9.84252	-5.6713	0.000571737	0.0021052	-0.66053	28636	28978	21515	19725	18991	18989
SPNCRNA.776	0.356192	4.69309	5.67156	0.000571577	0.0021052	-0.745602	570	557	484	763	722	747
SPAC3F10.04	-0.239421	7.72438	-5.66998	0.000572576	0.00210707	-0.992322	5601	5412	5165	4927	4873	5044
SPAC4G9.05	-0.284283	6.34512	-5.66572	0.000575281	0.0021158	-0.984848	2119	2073	2121	1846	1857	1914
SPNCRNA.532	0.986349	5.86419	5.66161	0.000577908	0.00212423	-0.936286	1220	1126	661	2079	2075	2110
SPCC63.06	-0.292175	6.83133	-5.66049	0.000578624	0.00212563	-1.00911	3140	3037	2707	2700	2623	2527
SPAC212.02	2.36767	-4.36813	5.65983	0.000579051	0.00212597	-0.0228459	0	0	0	3	2	2
SPCC1183.12	1.29593	1.63643	5.65826	0.000580059	0.00212844	-0.0835354	55	49	36	136	146	95
SPAC6G9.03c	-0.29151	5.27399	-5.6571	0.000580801	0.00212994	-0.883506	1054	1020	940	899	909	859
SPAC4G8.10	0.293044	4.87865	5.65637	0.000581275	0.00213045	-0.80356	652	619	599	834	828	820
SPAC17H9.17c	-0.341373	4.95751	-5.65277	0.000583599	0.00213668	-0.826138	843	870	751	726	698	681
SPBC30D10.17c	-0.286482	7.9383	-5.6527	0.000583646	0.00213668	-0.993439	6340	6430	6290	5443	5642	5862
SPAC26H5.04	0.491317	5.45131	5.65201	0.000584091	0.00213707	-0.910658	863	812	926	1209	1343	1408
SPCC553.03	-0.394685	6.72372	-5.64407	0.000589258	0.00215474	-1.02612	2772	2729	3036	2329	2349	2350
SPBC12C2.12c	0.702454	7.8922	5.63938	0.000592337	0.00216475	-0.997248	4813	5082	3409	7734	7973	7411
SPBPB8B6.05c	-0.818525	5.07419	-5.63814	0.000593157	0.0021665	-0.859144	1184	1213	801	629	709	602
SPBC11B10.02c	-0.323758	7.44007	-5.6368	0.000594038	0.00216811	-1.04507	4817	4750	4136	4096	3736	4013
SPBC4F6.08c	0.310598	6.00357	5.63644	0.000594279	0.00216811	-0.997188	1439	1414	1211	1844	1802	1803
SPAC3H5.07	-0.628737	9.77987	-5.63528	0.000595044	0.00216937	-0.712421	28187	28918	20730	19249	17316	17376
SPBC16G5.15c	0.288661	6.79148	5.63425	0.000595727	0.00216937	-1.03961	2325	2393	2335	2990	3205	3144
SPBC31E1.06	-0.33391	8.49453	-5.63385	0.000595989	0.00216937	-0.925613	9308	9424	9755	8049	8169	8294
SPBC3E7.04c	0.324905	4.88319	5.63464	0.000595466	0.00216937	-0.830543	615	638	602	819	873	826
SPAC227.15	0.610425	7.55063	5.63015	0.000598448	0.0021762	-1.03898	3414	3249	4065	5669	5693	6325
SPCC663.08c	0.522253	4.09886	5.62999	0.00059855	0.0021762	-0.665338	353	379	280	523	518	525
SPNCRNA.781	0.734408	6.08484	5.62885	0.000599314	0.00217774	-1.00648	1316	1509	944	2214	2291	2177
SPBC56F2.05c	0.4802	5.41891	5.62684	0.000600654	0.00218136	-0.936505	914	758	885	1210	1338	1306
SPBC4B4.04	-0.280635	8.28603	-5.62261	0.00060349	0.00218964	-0.978816	8056	8242	7910	7080	7079	7448
SPNCRNA.1690	0.4594	5.71546	5.62241	0.000603622	0.00218964	-0.98357	1049	1076	1028	1405	1744	1566
SPAC4F8.06	0.28563	6.18457	5.62005	0.000605209	0.00219414	-1.03029	1610	1599	1432	2128	1984	2014
SPSNORNA.31	1.33731	-0.302064	5.61855	0.000606225	0.00219657	0.148998	12	9	14	30	31	36
SPBPB21E7.06	3.07821	-3.48471	5.61646	0.000607638	0.00220044	0.0116619	0	1	0	5	5	9
SPNCRNA.1297	-0.465988	4.16033	-5.61523	0.000608468	0.00220219	-0.701325	543	514	427	375	399	386
SPNCRNA.1265	0.31304	4.73186	5.61332	0.000609763	0.00220562	-0.825179	591	563	524	757	766	735
SPNCRNA.807	0.595247	3.84111	5.61113	0.000611253	0.00220975	-0.630881	309	293	224	429	479	437
SPAC1F3.02c	0.374302	6.45298	5.60808	0.000613341	0.00221604	-1.0587	1781	1771	1864	2367	2610	2636
SPCP31B10.04	0.308522	7.22165	5.60619	0.000614634	0.00221945	-1.08145	3104	3322	3019	4366	4291	4017
SPBC365.14c	-0.258557	7.97312	-5.60345	0.000616512	0.00222497	-1.0502	6520	6690	6142	5674	5954	5895
SPNCRNA.477	0.691708	2.07575	5.60284	0.000616936	0.00222524	-0.259172	89	73	71	137	145	126
SPNCRNA.602	1.21014	2.25161	5.59935	0.000619341	0.00223265	-0.283331	78	95	52	162	225	171
SPAC3F10.13	0.356804	6.33102	5.59483	0.000622477	0.00224268	-1.06922	1639	1728	1640	2145	2353	2459
SPBC18H10.20c	-0.463051	7.53002	-5.5936	0.000623327	0.00224447	-1.09375	4938	4945	5397	3678	4327	4028
SPBC1289.16c	0.462969	5.73948	5.58772	0.000627435	0.00225799	-1.02886	1065	1093	1044	1428	1781	1592
SPAC29A4.13	-0.267654	5.81427	-5.58045	0.000632563	0.0022743	-1.05228	1472	1441	1431	1336	1277	1297
SPCC1020.06c	0.481482	9.96719	5.58028	0.000632683	0.0022743	-0.754193	21513	21297	17151	28580	30460	31179
SPBC21B10.06c	-0.332589	6.62222	-5.57686	0.000635103	0.00228171	-1.10563	2716	2755	2329	2188	2165	2345
SPBC17F3.02	0.585687	7.11386	5.57253	0.000638193	0.00228933	-1.11979	2503	2435	3061	4268	4304	4366
SPBC32F12.05c	-0.258209	5.87561	-5.57326	0.000637671	0.00228933	-1.06646	1550	1518	1451	1391	1383	1320
SPBC32H8.08c	-0.260543	6.37744	-5.57237	0.000638305	0.00228933	-1.10095	2282	2101	2027	1960	1914	1918
SPAC9E9.03	-0.327077	9.75313	-5.57033	0.000639767	0.00229328	-0.796132	23087	22666	22265	19271	19705	19792
SPAC977.17	-0.592612	6.39417	-5.56881	0.000640856	0.00229589	-1.10438	2351	2338	2587	1493	1918	1841
SPCC794.01c	0.832561	4.25026	5.56289	0.000645121	0.00230857	-0.773058	309	322	376	542	758	651
SPNCRNA.796	-0.265085	6.51241	-5.56293	0.00064509	0.00230857	-1.1189	2421	2453	2177	2172	2103	2076
SPCC1223.08c	-0.318	8.34343	-5.56094	0.000646532	0.00231232	-1.04385	9220	8764	7628	7400	7347	7428
SPNCRNA.1691	0.98989	2.2268	5.55514	0.000650754	0.00232611	-0.33959	82	97	58	150	191	164
SPAC3G9.01	-0.421219	6.4988	-5.55119	0.000653642	0.00233512	-1.132	2336	2438	2597	1891	1965	2108
SPAC4D7.09	-0.304255	7.89378	-5.55067	0.000654024	0.00233517	-1.12326	6506	6570	5577	5542	5344	5433
SPBC336.06c	-0.303324	6.11144	-5.54714	0.000656623	0.00234313	-1.1162	1891	1860	1661	1630	1620	1499
SPNCRNA.1088	-0.858253	1.34997	-5.54518	0.000658074	0.002347	-0.180902	76	76	89	52	45	46
SPCC576.04	0.873034	6.12487	5.54244	0.000660098	0.0023529	-1.11289	1097	1049	1541	2191	2554	2464
SPBC13E7.11	0.273928	5.83309	5.53982	0.000662046	0.00235852	-1.1015	1228	1257	1164	1613	1531	1637
SPNCRNA.1667	-0.351098	5.45849	-5.53786	0.000663507	0.0023624	-1.06003	1258	1208	1038	1028	957	985
SPNCRNA.1072	-0.310753	8.49302	-5.5361	0.000664823	0.00236576	-1.04606	9543	9962	8775	8566	8127	7985
SPCC594.07c	-0.239011	7.04295	-5.53536	0.000665374	0.00236639	-1.16727	3534	3367	3188	3037	3151	3069
SPBC1348.03	2.20598	-4.44903	5.5344	0.00066609	0.00236762	-0.140443	0	0	0	2	2	2
SPCC1672.04c	0.54498	4.01082	5.53332	0.0006669	0.00236917	-0.763949	347	340	258	471	508	507
SPAC9E9.12c	0.598075	8.01777	5.53126	0.000668452	0.00237234	-1.11902	5628	5417	3961	8115	7975	8220
SPBC839.12	-0.295323	6.14598	-5.53114	0.000668537	0.00237234	-1.13826	1939	1893	1696	1665	1665	1547
SPAC3H1.03	-0.479039	4.99043	-5.52929	0.000669935	0.00237534	-0.982906	912	990	753	710	667	677
SPNCRNA.144	0.920384	0.500293	5.52903	0.000670132	0.00237534	-0.0479139	22	25	24	49	46	52
SPNCRNA.907	-0.802754	3.03878	-5.52746	0.000671315	0.00237821	-0.560371	293	267	209	179	134	164
SPAC1071.08	-0.776578	6.79209	-5.52357	0.000674264	0.00238733	-1.17447	3681	4075	2624	2396	2111	1971
SPACUNK4.12c	-0.291126	6.68931	-5.52133	0.000675963	0.00239201	-1.17642	2792	2678	2567	2235	2389	2497
SPAP8A3.07c	-0.381958	8.93141	-5.51689	0.000679357	0.00240269	-0.986591	13456	13505	12300	11710	10861	10101
SPAC18B11.07c	0.489131	7.28066	5.51623	0.000679859	0.00240312	-1.19008	3252	3481	2576	4866	4516	4673
SPAC16E8.12c	-0.284727	5.97543	-5.51496	0.000680833	0.00240488	-1.14649	1595	1667	1625	1421	1466	1459
SPAC25B8.16	-0.363695	6.00996	-5.5146	0.000681111	0.00240488	-1.1491	1699	1652	1796	1389	1469	1474
SPBC800.07c	-0.297044	7.20468	-5.51002	0.000684636	0.00241598	-1.20122	3811	3804	3891	3480	3268	3403
SPAC22F3.03c	0.540961	4.93346	5.50749	0.000686591	0.00242019	-0.993285	570	546	675	919	923	965
SPAPB1E7.03	-0.32141	7.14638	-5.50785	0.000686319	0.00242019	-1.20304	3830	3902	3429	3435	3065	3175
SPNCRNA.1250	-0.480881	5.67618	-5.50209	0.000690789	0.00243257	-1.13169	1478	1601	1200	1138	1106	1058
SPNCRNA.292	-1.58268	-1.04114	-5.502	0.000690866	0.00243257	0.0598031	21	24	14	7	6	7
SPBC31F10.15c	0.696599	6.65925	5.49961	0.000692732	0.00243779	-1.19784	2195	2041	1439	3320	3475	3036
SPBC36.03c	-0.849696	7.34685	-5.49872	0.000693425	0.00243888	-1.20783	4863	4292	6443	2966	3018	3276
SPAC57A7.05	0.608978	6.20299	5.49611	0.000695474	0.00244473	-1.18087	1575	1521	1141	2061	2437	2465
SPAC57A10.12c	-0.398875	9.48538	-5.49554	0.000695921	0.00244495	-0.925072	18868	18857	20202	16208	15509	15915
SPBC1348.05	2.79906	-3.62421	5.49483	0.000696478	0.00244556	-0.109608	0	1	0	5	4	6
SPBP23A10.08	-0.270503	7.07775	-5.49029	0.000700062	0.00245678	-1.2238	3567	3553	3325	3069	3017	3300
SPAC1565.06c	0.510678	6.45095	5.48939	0.000700774	0.00245793	-1.20376	1792	1518	1868	2792	2559	2615
SPAC6G9.12	0.311297	7.67475	5.48713	0.00070257	0.0024608	-1.21667	4298	4240	4370	5514	5869	5985
SPBC1347.01c	0.424843	4.45631	5.4869	0.000702753	0.0024608	-0.920569	470	407	458	625	655	658
SPCC1620.08	0.234526	7.32307	5.48757	0.000702223	0.0024608	-1.22862	3642	3519	3239	4371	4449	4425
SPAC13D6.03c	-0.329641	5.80389	-5.48595	0.000703504	0.00246207	-1.16745	1536	1493	1381	1362	1248	1195
SPCC4G3.07c	0.386297	6.14612	5.48361	0.00070537	0.00246724	-1.19534	1430	1395	1538	2025	2153	1997
SPAC1399.05c	-0.407629	5.24867	-5.47757	0.000710213	0.00248153	-1.09816	1004	987	1094	859	827	829
SPBC83.16c	0.329641	7.86901	5.47754	0.000710236	0.00248153	-1.21247	4933	4816	4925	6218	6913	6880
SPAC17G6.11c	-0.302926	6.83611	-5.47597	0.000711498	0.00248391	-1.23651	3190	3077	2686	2554	2574	2719
SPBC2F12.02c	-0.32458	6.35753	-5.47572	0.000711697	0.00248391	-1.21931	2219	2136	2103	2011	1782	1802
SPBC1198.03c	-0.268011	5.6213	-5.47357	0.000713432	0.0024886	-1.1635	1358	1256	1191	1136	1152	1132
SPAC4D7.12c	-0.293289	6.70505	-5.4681	0.000717869	0.0025027	-1.243	2624	2809	2697	2439	2403	2345
SPAC20G8.10c	0.392652	4.70424	5.46358	0.000721561	0.0025142	-1.00292	521	529	551	717	788	772
SPAC31A2.12	-0.26342	6.56714	-5.46051	0.000724075	0.00252157	-1.24809	2541	2368	2404	2146	2207	2247
SPBC646.05c	-0.283751	8.3969	-5.45932	0.000725052	0.00252359	-1.15999	9304	8897	8027	7927	7600	7767
SPNCRNA.475	-2.74806	-0.579214	-5.45591	0.000727867	0.00253201	-0.0018166	58	50	22	7	4	8
SPAC22G7.09c	-0.323567	7.57923	-5.44996	0.000732806	0.0025464	-1.27143	4820	5210	5030	4343	4182	4519
SPNCRNA.1409	0.766349	5.43722	5.45032	0.000732506	0.0025464	-1.14671	922	894	570	1443	1382	1493
SPAC630.04c	0.273507	7.79369	5.44778	0.00073462	0.00254992	-1.25753	4819	4914	4480	5971	6506	6138
SPCC320.06	0.359333	6.97401	5.44792	0.000734501	0.00254992	-1.27403	2822	2714	2303	3458	3581	3829
SPNCRNA.1189	0.757231	5.55546	5.44375	0.000737995	0.00256023	-1.17292	998	976	623	1542	1616	1513
SPAC13C5.03	0.310085	5.18115	5.43823	0.000742639	0.00257494	-1.13268	798	763	732	1002	993	1087
SPCC306.06c	-0.226972	7.41108	-5.43735	0.00074338	0.0025761	-1.29269	4455	4296	4209	4007	4023	3967
SPAC1805.02c	-0.329791	7.42398	-5.43531	0.000745112	0.00257678	-1.29434	4756	4846	3996	3927	3959	3796
SPAC3F10.05c	-0.285823	5.32676	-5.43473	0.000745601	0.00257678	-1.16704	1050	1023	1045	921	918	931
SPCC1739.04c	0.282298	5.71685	5.43605	0.000744483	0.00257678	-1.21828	1148	1098	1110	1421	1478	1524
SPCC4G3.06c	0.317174	6.06581	5.43545	0.000744995	0.00257678	-1.2503	1459	1519	1257	1898	1920	1884
SPNCRNA.620	-0.466073	4.83553	-5.4352	0.000745207	0.00257678	-1.06773	808	776	777	545	685	629
SPBC32H8.15	1.80596	-1.54187	5.42786	0.000751455	0.00259419	-0.0138668	6	3	3	18	17	13
SPCC1235.14	1.01707	6.03874	5.4279	0.000751426	0.00259419	-1.24329	931	917	1498	2315	2431	2374
SPCC569.03	0.511875	4.89227	5.4243	0.000754507	0.00260332	-1.089	680	572	508	848	978	884
SPAC186.08c	2.16955	0.93665	5.4212	0.000757184	0.00261114	-0.203969	21	41	10	111	81	122
SPNCRNA.873	0.377218	4.14197	5.42053	0.000757756	0.00261169	-0.935226	369	362	358	484	537	513
SPBC651.09c	0.30237	7.55835	5.41698	0.000760831	0.00262087	-1.31038	3943	4063	3939	5000	5481	5496
SPAP14E8.05c	-0.423727	4.82902	-5.41591	0.00076176	0.00262265	-1.09085	867	767	690	650	636	587
SPCC5E4.06	-0.282059	6.0634	-5.41514	0.000762434	0.00262355	-1.27719	1754	1701	1734	1483	1577	1565
SPAC6F6.15	0.294573	6.59919	5.40981	0.000767081	0.00263668	-1.31112	2151	2105	1911	2874	2732	2589
SPBC32F12.17	0.430498	4.31715	5.41028	0.000766673	0.00263668	-0.985448	402	381	426	562	604	597
SPNCRNA.1150	-0.281397	6.064	-5.40822	0.000768477	0.00264006	-1.2859	1755	1701	1734	1484	1577	1567
SPBC800.05c	-0.306074	7.8894	-5.40587	0.000770539	0.00264571	-1.30384	6028	6549	5989	5173	5524	5575
SPAC27E2.07	-0.303375	5.88434	-5.40252	0.000773496	0.00265443	-1.27913	1657	1532	1435	1393	1281	1383
SPNCRNA.1102	-0.501188	3.16305	-5.39686	0.00077851	0.0026702	-0.752461	259	265	226	186	180	208
SPCC1494.02c	0.308799	6.01057	5.39396	0.000781098	0.00267643	-1.29811	1434	1377	1269	1889	1880	1708
SPNCRNA.1026	0.753211	4.14546	5.39388	0.000781169	0.00267643	-0.961486	291	284	396	550	591	608
SPAC1952.14c	-0.295841	6.00502	-5.39246	0.000782442	0.00267935	-1.30153	1636	1782	1594	1483	1505	1432
SPAC5H10.07	-0.367414	4.07313	-5.39148	0.000783319	0.00268091	-0.959237	452	479	415	373	384	372
SPNCRNA.1586	-0.278895	6.82103	-5.38916	0.0007854	0.00268658	-1.34474	2967	2842	2956	2595	2559	2674
SPBC1198.06c	-0.317952	6.79122	-5.38611	0.000788144	0.00269452	-1.34785	2931	2773	3002	2528	2479	2557
SPAC13G6.09	-0.287427	6.71026	-5.38412	0.00078994	0.00269921	-1.34827	2701	2833	2610	2525	2403	2304
SPAPB1A10.06c	-0.317769	6.85621	-5.38148	0.000792336	0.00270594	-1.35517	3000	3032	3070	2546	2571	2803
SPCC736.14	0.35195	7.50398	5.3788	0.000794767	0.00271262	-1.35935	3807	3566	3943	5047	5351	5244
SPNCRNA.765	0.711544	2.95644	5.37839	0.000795146	0.00271262	-0.722764	164	148	117	267	222	271
SPNCRNA.1124	0.436981	3.2442	5.37152	0.000801425	0.00273258	-0.799261	191	186	195	275	285	279
SPCC553.05c	1.05507	1.14188	5.36776	0.000804892	0.00274204	-0.3435	36	41	30	71	99	74
SPCC613.08	-0.500902	6.18282	-5.36758	0.000805061	0.00274204	-1.34378	2136	2226	1750	1724	1532	1416
SPCC645.03c	0.461399	7.25195	5.36507	0.000807375	0.00274845	-1.37971	2972	2827	3367	4620	4563	4456
SPAC1A6.10	-0.231902	7.35276	-5.36261	0.000809663	0.00275476	-1.38662	4343	4263	3874	3882	3808	3812
SPNCRNA.1319	-0.394616	4.10836	-5.35779	0.000814157	0.00276857	-1.00895	463	455	473	389	394	363
SPAC2F7.14c	-0.314684	6.30943	-5.35234	0.000819265	0.00278374	-1.37128	2218	2164	1859	1881	1789	1755
SPAC9G1.12	-0.258182	7.81803	-5.3521	0.000819493	0.00278374	-1.37905	5917	5742	5708	5408	5260	5074
SPCC320.07c	0.480468	4.17486	5.35038	0.000821118	0.00278777	-1.02842	334	364	379	506	561	559
SPAC3G9.05	-0.513606	6.80846	-5.34862	0.000822777	0.00279191	-1.39498	2985	2943	3529	2421	2276	2459
SPBC1703.14c	0.242274	7.33834	5.34807	0.000823301	0.0027922	-1.40326	3696	3554	3236	4415	4446	4562
SPNCRNA.19	1.10833	2.15634	5.34705	0.000824268	0.00279399	-0.574035	78	90	50	150	199	154
SPAC13F5.04c	0.699066	2.15385	5.34583	0.000825421	0.00279641	-0.588499	83	89	73	129	162	142
SPAC343.02	-0.353321	6.89345	-5.34235	0.000828729	0.00280612	-1.40527	3511	3223	2766	2732	2621	2669
SPAC23H3.03c	0.293674	5.48752	5.33796	0.000832924	0.00281882	-1.31073	1037	953	867	1256	1272	1260
SPBC776.03	-0.357593	8.89936	-5.32945	0.000841131	0.00284508	-1.22645	13403	13627	11174	10544	10781	10833
SPAC1F5.03c	-0.381461	7.74324	-5.32506	0.000845403	0.00285647	-1.41805	5642	5446	6137	4777	4674	4871
SPAC328.07c	0.256849	6.77629	5.3246	0.000845844	0.00285647	-1.4245	2368	2344	2344	3137	3001	3000
SPNCRNA.1542	0.311812	4.97685	5.32494	0.000845513	0.00285647	-1.23443	655	693	641	863	927	885
SPNCRNA.623	-0.353872	3.96225	-5.32143	0.00084894	0.0028654	-1.02246	423	407	409	354	340	356
SPCC663.18	0.500719	8.26327	5.31982	0.000850522	0.00286922	-1.35078	6410	6783	5122	9024	10013	8863
SPAC607.09c	0.573874	4.00915	5.31905	0.000851281	0.00287025	-1.02964	285	304	342	464	541	493
SPBC3B8.07c	0.516202	8.03178	5.31341	0.000856836	0.00288681	-1.39276	4926	4776	5743	7767	8263	7853
SPNCRNA.62	-0.436149	3.3522	-5.31315	0.000857099	0.00288681	-0.898139	270	285	280	230	222	216
SPBC365.16	-0.663959	7.52738	-5.30509	0.000865109	0.00291224	-1.44951	5431	5031	5909	3099	4002	4173
SPAP4C9.02	-0.430759	5.33551	-5.3039	0.000866306	0.00291473	-1.33133	1247	1081	984	955	848	853
SPCC24B10.18	-0.72087	6.33414	-5.28791	0.000882473	0.00296755	-1.45151	2503	2925	1957	1758	1668	1390
SPCC584.16c	0.813573	4.38431	5.28673	0.000883679	0.00297004	-1.14706	391	285	453	702	715	690
SPAC1952.06c	-0.419929	6.55825	-5.28566	0.000884777	0.00297216	-1.46699	2585	2406	2687	2178	1901	2144
SPCC548.03c	1.03633	1.10946	5.28459	0.000885878	0.00297429	-0.439	40	32	33	96	74	67
SPNCRNA.1084	-0.719646	1.97007	-5.28205	0.000888481	0.00298145	-0.632369	118	127	108	79	88	66
SPBC646.14c	-0.262313	6.58539	-5.28072	0.000889857	0.0029845	-1.47505	2476	2516	2409	2333	2177	2179
SPAC25B8.15c	-0.306887	5.57703	-5.27772	0.000892955	0.00298858	-1.40336	1313	1316	1116	1116	1074	1083
SPBC18H10.06c	-0.359666	4.90765	-5.27806	0.000892601	0.00298858	-1.28138	862	832	705	688	652	681
SPCC18.10	-0.317489	6.92794	-5.27842	0.000892233	0.00298858	-1.48711	3357	3414	2827	2833	2780	2706
SPCC736.08	-0.236051	7.12042	-5.27857	0.000892072	0.00298858	-1.49073	3655	3647	3333	3305	3158	3316
SPNCRNA.1159	0.767596	2.8116	5.27571	0.000895041	0.00299399	-0.817689	160	126	98	243	236	220
SPBC3B9.03	-0.390917	6.58222	-5.27216	0.000898731	0.00300475	-1.48531	2962	2454	2344	2049	2138	2196
SPCC338.08	0.754366	5.42189	5.26671	0.000904432	0.00302222	-1.37595	918	893	562	1409	1464	1381
SPCC16C4.19	-0.353129	5.4746	-5.26363	0.000907668	0.00303071	-1.40627	1220	1262	1062	984	1066	953
SPCC1902.01	-0.337466	7.69944	-5.26339	0.000907926	0.00303071	-1.50002	5584	5141	5730	4717	4703	4684
SPAC1687.22c	0.836258	6.70818	5.25962	0.000911914	0.00304242	-1.50012	1656	1582	2363	3418	3539	3696
SPAC13G7.05	0.408217	5.95898	5.25876	0.000912825	0.00304387	-1.46365	1366	1150	1293	1786	1747	1935
SPBC11C11.10	-0.435638	7.79672	-5.2574	0.000914266	0.00304707	-1.49861	6515	6706	5115	5050	4687	4843
SPCC1322.05c	0.286052	7.18418	5.25332	0.000918614	0.00305996	-1.52308	3210	2950	3113	4096	3968	4184
SPAC56F8.08	0.270816	7.20997	5.25156	0.00092049	0.00306193	-1.52547	3184	3403	2916	4128	4117	4156
SPAP8A3.11c	-0.321428	5.33447	-5.25137	0.0009207	0.00306193	-1.39936	1023	1122	1031	923	883	946
SPBC27.02c	-0.319289	5.09626	-5.25052	0.000921612	0.00306193	-1.35552	924	869	896	793	802	740
SPBC428.01c	-0.275215	6.85829	-5.251	0.000921092	0.00306193	-1.52051	3051	2984	2947	2608	2597	2844
SPBP8B7.02	0.301124	5.03591	5.25095	0.000921144	0.00306193	-1.34031	702	699	678	949	948	880
SPAC1F8.07c	-0.587717	12.5667	-5.24616	0.000926289	0.00307586	-0.857092	187996	191945	147363	123249	119910	134560
SPAC6F6.03c	-0.340854	8.63497	-5.24455	0.000928028	0.0030788	-1.38411	10943	11306	9354	9266	8714	8956
SPNCRNA.662	0.333999	4.34271	5.24445	0.000928143	0.0030788	-1.20137	448	432	392	580	558	599
SPAC6G9.01c	0.550111	5.55215	5.24136	0.000931483	0.00308815	-1.43553	978	988	776	1503	1583	1265
SPCC70.09c	1.42423	2.36448	5.24094	0.000931934	0.00308815	-0.73849	67	49	121	223	218	199
SPAC1142.07c	0.31112	6.16612	5.23809	0.000935035	0.00309682	-1.50659	1637	1548	1363	2043	2113	1947
SPCC1223.06	-0.257008	7.06211	-5.23731	0.000935886	0.00309802	-1.54226	3512	3456	3314	2943	3201	3184
SPBC14F5.02	-0.233297	7.31086	-5.23178	0.000941934	0.00311642	-1.55269	4115	4078	3923	3847	3659	3664
SPBC530.15c	-0.363402	7.86033	-5.22466	0.000949793	0.00314079	-1.5359	5979	6093	6479	4936	5270	5436
SPAC4F8.14c	-0.333087	8.31503	-5.22279	0.000951867	0.00314601	-1.47323	9049	8737	7466	7482	6909	7249
SPNCRNA.935	-0.329661	4.73832	-5.21972	0.000955278	0.00315564	-1.32003	699	703	703	575	611	629
SPCC1840.01c	-0.315037	5.89202	-5.2182	0.000956978	0.00315962	-1.51321	1518	1539	1605	1348	1324	1387
SPAC25B8.20	-0.28375	4.90453	-5.21766	0.000957587	0.00315999	-1.35819	777	795	753	679	678	712
SPBC12C2.06	-0.231183	8.17843	-5.21248	0.000963387	0.00317748	-1.51144	7466	7537	7091	6883	6735	6775
SPAC26A3.06	-0.482184	6.47807	-5.21158	0.000964401	0.00317917	-1.5578	2633	2746	2086	2007	1996	1759
SPAC25B8.14	-0.30258	5.59855	-5.20929	0.000966994	0.00318589	-1.49362	1331	1336	1129	1128	1097	1102
SPCC663.13c	-0.405191	5.5051	-5.20889	0.000967439	0.00318589	-1.47994	1323	1322	1051	1037	961	1013
SPBC1826.01c	-0.568647	7.2424	-5.20387	0.000973135	0.00320298	-1.58586	3998	4062	4981	3006	3328	3156
SPBC685.08	-0.42818	4.15707	-5.20259	0.000974599	0.00320614	-1.21572	554	463	444	393	389	390
SPBP35G2.12	0.348323	6.20423	5.20165	0.000975663	0.00320798	-1.55546	1630	1619	1363	2201	2168	1982
SPAC21E11.05c	-0.24275	6.85769	-5.19728	0.00098067	0.00322278	-1.58926	2924	3050	2905	2693	2752	2685
SPBC1198.11c	-0.221448	6.44605	-5.1927	0.000985935	0.00323549	-1.58169	2297	2257	2076	2027	2055	2075
SPNCRNA.1689	0.585433	3.39976	5.19288	0.000985729	0.00323549	-1.05553	226	219	165	338	344	305
SPNCRNA.563	-0.321939	4.70779	-5.19259	0.000986065	0.00323549	-1.34827	723	717	619	600	601	581
SPAC19D5.06c	-0.39361	5.83018	-5.19191	0.00098685	0.0032364	-1.54062	1624	1677	1312	1234	1301	1251
SPAC630.06c	0.301362	6.4279	5.19147	0.000987362	0.00323641	-1.581	1915	1711	1837	2377	2437	2474
SPAC19G12.06c	-0.381951	9.4884	-5.18702	0.00099252	0.00325164	-1.31292	20765	20138	17035	16761	15815	15421
SPCPB16A4.05c	-0.257306	6.8384	-5.1828	0.000997438	0.00326607	-1.60739	3076	2990	2747	2788	2620	2578
SPAC11D3.04c	-0.592183	6.0305	-5.17912	0.00100176	0.00327854	-1.57209	2102	2134	1485	1399	1301	1362
SPAC17G8.06c	-0.307258	9.88133	-5.17831	0.00100271	0.00327997	-1.27009	25340	24722	23790	21486	21148	22038
SPAC821.10c	-0.60523	9.56416	-5.17499	0.00100662	0.00328935	-1.31736	24352	24304	17791	16629	16249	14025
SPBC2G2.15c	-0.308417	5.44789	-5.17515	0.00100643	0.00328935	-1.51594	1135	1109	1175	985	1004	1000
SPAC11E3.05	0.314032	6.66245	5.17382	0.00100801	0.00329051	-1.61301	2142	2102	2149	2675	2963	2984
SPNCRNA.469	0.922646	0.428387	5.17382	0.00100801	0.00329051	-0.459484	24	26	18	46	48	46
SPNCRNA.714	-0.527328	5.34578	-5.17271	0.00100931	0.00329309	-1.49854	1075	1091	1282	820	844	919
SPAC11G7.06c	-0.388624	5.37356	-5.17071	0.00101169	0.00329915	-1.50844	1098	1090	1151	873	890	1003
SPAC890.04c	-0.269035	8.03488	-5.16861	0.00101419	0.00330559	-1.58854	6866	6791	6603	6375	5813	6046
SPCC1281.08	-0.280003	6.29603	-5.16758	0.00101542	0.00330792	-1.60601	2071	2110	1916	1922	1781	1739
SPNCRNA.745	0.925677	1.36863	5.16699	0.00101612	0.00330851	-0.637759	53	48	32	93	95	83
SPAC644.05c	0.656617	5.13814	5.16116	0.0010231	0.00332953	-1.46646	766	737	501	1206	1097	1077
SPNCRNA.801	0.758953	2.1278	5.15932	0.00102533	0.00333506	-0.814081	77	89	70	126	166	143
SPAC2F3.01	0.250253	6.42199	5.15786	0.00102708	0.00333908	-1.62424	1869	1876	1788	2288	2480	2366
SPCC14G10.03c	0.433937	7.36687	5.15376	0.00103205	0.00335351	-1.64759	3571	3698	2798	5058	4827	4751
SPAC19A8.13	-0.283931	5.46353	-5.15109	0.0010353	0.00336234	-1.54978	1198	1190	1043	1051	1012	987
SPBC16D10.09	-0.295495	8.52111	-5.14834	0.00103865	0.0033715	-1.52985	9992	9887	8814	8814	8051	8435
SPAC227.08c	0.407764	4.54643	5.14763	0.00103952	0.00337259	-1.36841	503	515	414	712	693	649
SPAC1834.07	-0.273458	6.37951	-5.14714	0.00104012	0.00337284	-1.63698	2091	2191	2160	1905	1963	1906
SPBC11C11.08	-0.287143	8.23884	-5.14544	0.0010422	0.00337785	-1.58666	8148	8101	7270	7274	6594	7000
SPAC1002.13c	-0.387774	10.1964	-5.14249	0.00104583	0.00338627	-1.27394	33838	33300	27727	25556	26328	26327
SPBC1709.06	-0.292529	6.15561	-5.14246	0.00104586	0.00338627	-1.62997	1951	1940	1673	1702	1633	1579
ENSRNA049676666	2.26319	-2.83587	5.13842	0.00105086	0.00340073	-0.372537	1	1	1	5	11	7
SPAC1142.05	-0.545776	5.67471	-5.1346	0.0010556	0.00341433	-1.59533	1724	1473	1192	1083	1125	1019
SPAC1071.06	-0.225393	7.06178	-5.13011	0.0010612	0.0034307	-1.68005	3552	3486	3141	3144	3148	3130
SPAC15E1.03	-0.653499	10.1499	-5.1283	0.00106348	0.00343548	-1.29742	36874	38657	26265	24929	22287	21924
SPAC227.13c	0.831041	8.58809	5.12807	0.00106376	0.00343548	-1.5343	7729	8050	5000	12461	13586	13075
SPBC36.09	-0.225966	6.85826	-5.12416	0.00106868	0.00344961	-1.68348	2990	3064	2782	2768	2728	2685
SPAC20G4.02c	0.666035	5.11039	5.11696	0.00107781	0.00347731	-1.51822	574	591	787	1059	1140	1114
SPBC19C7.07c	-0.339896	6.28965	-5.11614	0.00107886	0.00347893	-1.67191	2167	2230	1819	1824	1692	1789
SPBC25H2.12c	-0.28574	8.64031	-5.11457	0.00108085	0.00348361	-1.55011	10714	10800	9544	9322	8817	9427
SPBC31F10.16	0.287846	7.86138	5.10577	0.00109216	0.00351826	-1.68601	4940	4953	4916	6179	6890	6546
SPAC17A2.13c	0.376845	9.60247	5.10487	0.00109333	0.00352024	-1.40217	16944	16980	14259	23400	22729	21447
SPCC1672.11c	-0.368527	7.21567	-5.10351	0.00109509	0.00352412	-1.71663	3774	3897	4227	3236	3337	3404
SPNCRNA.1230	0.325999	5.37745	5.10129	0.00109797	0.00353159	-1.59545	938	920	763	1191	1179	1180
SPBC725.07	-0.366085	6.01751	-5.09878	0.00110124	0.00353953	-1.67672	1779	1642	1757	1330	1497	1531
SPBC8D2.16c	-0.316284	6.85178	-5.09854	0.00110154	0.00353953	-1.71644	2927	3032	3113	2738	2540	2618
SPBC428.13c	0.560729	3.69063	5.09668	0.00110398	0.00354556	-1.24306	252	228	269	358	430	409
SPAC14C4.12c	-0.367145	6.06764	-5.09335	0.00110835	0.00355778	-1.68746	1926	1911	1548	1444	1569	1493
SPAC13A11.06	0.347278	3.82964	5.09239	0.00110961	0.00356004	-1.28247	303	299	284	403	395	424
SPBC56F2.07c	-0.347946	5.35872	-5.07768	0.00112913	0.00362084	-1.62661	1175	1137	956	962	888	925
SPBC4.04c	-0.248556	6.46186	-5.07677	0.00113035	0.0036211	-1.73214	2328	2228	2206	2111	1968	2090
SPCC364.05	0.43693	5.57777	5.07682	0.00113029	0.0036211	-1.65452	908	926	1063	1450	1373	1411
SPBC428.14	0.218975	7.09634	5.0745	0.00113341	0.00362907	-1.75236	3080	2962	2886	3658	3790	3811
SPBC887.08	-0.333261	4.84674	-5.07359	0.00113463	0.00363115	-1.53111	810	778	688	686	621	649
SPNCRNA.615	-0.374817	5.68877	-5.06736	0.00114306	0.00365629	-1.68732	1505	1465	1184	1170	1116	1169
SPAC17D4.03c	-0.444289	6.64412	-5.0659	0.00114505	0.00366081	-1.75274	2759	2501	2970	2251	2042	2251
SPNCRNA.205	0.423477	4.07074	5.06544	0.00114568	0.00366098	-1.36979	368	367	290	488	492	504
SPCC1827.03c	-0.341244	10.0856	-5.06462	0.00114679	0.0036627	-1.38917	28576	28296	29179	24242	24634	24769
SPAC10F6.06	0.615167	9.56768	5.06228	0.00114998	0.00367106	-1.46184	15453	16772	11510	23552	24868	23175
SPAC23C11.08	0.334093	5.60182	5.06066	0.0011522	0.00367629	-1.68148	952	1055	1040	1384	1389	1382
SPAC4F10.11	-0.261667	6.69797	-5.05864	0.00115497	0.00368265	-1.76453	2681	2607	2712	2387	2398	2445
SPBC337.05c	-0.27585	8.63785	-5.05812	0.00115569	0.00368265	-1.62383	10665	10731	9502	9463	8912	9235
SPNCRNA.1197	0.67655	2.5158	5.05794	0.00115593	0.00368265	-1.03152	100	97	122	193	169	188
SPBC1604.05	0.545009	10.8571	5.05284	0.00116297	0.00370321	-1.30213	39899	39463	29741	55657	55937	59230
SPAC1751.04	-0.286253	5.61256	-5.04913	0.00116812	0.00371776	-1.70258	1352	1219	1234	1169	1085	1125
SPNCRNA.1169	0.338021	3.91017	5.04768	0.00117014	0.00372231	-1.35842	325	312	303	424	418	446
[truncated: 4,360 more rows]

## Sheet: lsd2-dC
Gene	logFC	AveExpr	t	P.Value	adj.P.Val	B	C1	C2	C3	T10	T11	T12
SPAC1002.09c	-2.2209	7.90296	-41.2823	7.5226e-10	4.32293e-06	13.4009	13279	13142	11360	2867	2659	2641
SPAC22G7.06c	-1.79028	9.49534	-32.8428	3.89891e-09	4.32293e-06	11.761	33994	33149	30794	9935	9504	9163
SPAC4H3.08	2.91452	6.13231	33.5832	3.32175e-09	4.32293e-06	12.0862	582	645	637	4475	5139	4590
SPBC119.03	1.6542	6.82852	31.9416	4.76169e-09	4.32293e-06	11.7945	1615	1625	1436	4830	5141	4887
SPBC2A9.14	2.27547	4.43098	34.413	2.78711e-09	4.32293e-06	11.9718	254	237	223	1168	1218	1112
SPCC790.02	1.81154	7.19813	32.1634	4.53082e-09	4.32293e-06	11.8393	1874	1902	1937	6945	7028	6314
SPNCRNA.1277	1.69264	6.13458	36.6016	1.78883e-09	4.32293e-06	12.6995	979	968	902	3178	3221	2914
SPBPB2B2.06c	2.48223	6.02187	30.0815	7.3261e-09	5.81967e-06	11.3519	728	651	627	3506	3875	3950
SPAC8E11.10	-1.27809	8.3476	-29.0505	9.4094e-09	5.97968e-06	11.1101	12494	12703	11799	5345	5098	4972
SPBC16E9.16c	3.35394	6.16378	29.4764	8.47637e-09	5.97968e-06	11.1957	524	562	549	4953	6196	5797
SPAC1B3.06c	1.25109	7.0001	27.7451	1.30845e-08	7.45844e-06	10.7899	2046	2080	1925	4769	4936	4842
SPAC630.08c	-1.87718	9.07951	-27.4618	1.40836e-08	7.45844e-06	10.677	24835	24130	26656	7046	6906	6851
SPAC23H3.15c	4.03032	4.69766	26.7779	1.68733e-08	8.24845e-06	10.3546	159	180	131	2447	2953	2370
SPBP23A10.12	1.26182	6.95487	26.1756	1.98597e-08	8.41389e-06	10.3647	1981	2017	1845	4870	4505	4783
SPNCRNA.832	4.05589	4.68231	26.3989	1.86872e-08	8.41389e-06	10.2606	152	179	130	2436	2953	2367
SPAC13G7.02c	2.09966	7.30422	24.7715	2.94688e-08	9.3637e-06	9.97286	1759	1901	1912	7442	8239	8438
SPAC23E2.02	1.98659	7.38126	25.2527	2.56789e-08	9.3637e-06	10.1131	2005	1916	2193	8526	8202	7736
SPBC23G7.10c	1.58056	6.40409	25.3301	2.51221e-08	9.3637e-06	10.131	1251	1184	1136	3492	3912	3404
SPBP19A11.07c	1.3351	6.55268	24.7971	2.92517e-08	9.3637e-06	9.97039	1563	1427	1326	3679	3584	3723
SPCC1393.12	1.42022	6.09339	24.9399	2.8074e-08	9.3637e-06	10.0222	1065	1040	940	2745	2933	2563
SPAC22H10.13	3.12875	5.17812	24.5356	3.1556e-08	9.47086e-06	9.89755	268	317	309	2429	2981	2503
SPAC27F1.10	3.5661	3.03554	24.1393	3.54531e-08	9.47086e-06	9.23754	61	67	46	686	661	736
SPACUNK4.16c	1.34073	7.85873	24.1611	3.52251e-08	9.47086e-06	9.79063	3600	3514	3521	8725	9454	9039
SPBC21C3.19	1.84141	6.76187	23.5952	4.17284e-08	9.47086e-06	9.60504	1293	1397	1497	5047	5206	4878
SPBC2A9.13	2.23121	3.51368	23.629	4.13036e-08	9.47086e-06	9.46675	131	129	123	623	654	549
SPBC354.12	3.34196	9.47917	23.7613	3.96872e-08	9.47086e-06	9.64963	5931	5937	4600	47938	62346	57977
SPBC359.02	-2.26837	2.9236	-23.6397	4.11703e-08	9.47086e-06	9.27922	432	409	374	92	87	75
SPBC359.03c	-1.80798	5.72214	-23.6063	4.15877e-08	9.47086e-06	9.63294	2544	2349	2317	798	679	611
SPBC8D2.18c	-1.3212	9.08538	-23.3027	4.56187e-08	9.99679e-06	9.54702	21795	21321	19569	8315	8523	8468
SPAC6G10.03c	1.11379	7.00724	22.8756	5.20618e-08	1.02519e-05	9.36296	2201	2129	2046	4826	4863	4275
SPBC25H2.07	-1.6762	8.48144	-22.7785	5.36673e-08	1.02519e-05	9.38015	17264	16442	13213	5164	4829	4733
SPBC30D10.15	-1.15768	6.85216	-22.7091	5.4849e-08	1.02519e-05	9.30947	4178	4139	4262	1924	1951	1824
SPBPB10D8.03	-3.60138	2.4218	-22.7111	5.4815e-08	1.02519e-05	8.58479	464	420	479	41	37	34
SPCC736.13	1.04538	7.33368	22.7526	5.41045e-08	1.02519e-05	9.32464	2805	2771	2613	5625	5639	5805
SPBC19C7.04c	1.97507	4.5896	22.5925	5.69038e-08	1.03321e-05	9.32113	330	314	246	1250	1183	1091
SPAC25B8.12c	-1.0095	7.66943	-21.8513	7.21956e-08	1.24001e-05	9.02946	7393	7013	6670	3728	3384	3464
SPNCRNA.1644	-1.01984	5.45473	-21.9093	7.0844e-08	1.24001e-05	9.0875	1558	1574	1424	791	761	717
SPCC4B3.01	0.903333	5.99007	21.7372	7.49423e-08	1.25331e-05	9.00381	1150	1171	1068	2164	2144	2095
SPAPB24D3.07c	1.90044	9.19379	21.0049	9.56787e-08	1.44771e-05	8.80915	6983	7652	7469	25898	30360	27297
SPNCRNA.1309	-2.12323	2.83571	-21.0434	9.44382e-08	1.44771e-05	8.58686	391	373	324	90	84	77
SPNCRNA.1527	3.49487	2.98134	21.0584	9.39613e-08	1.44771e-05	8.47911	71	65	39	657	639	662
SPNCRNA.291	-2.19909	4.46635	-21.1825	9.01069e-08	1.44771e-05	8.86646	1205	1085	1169	291	261	212
SPCC737.04	2.23571	4.34255	20.8374	1.01297e-07	1.49707e-05	8.74774	208	233	241	1066	1191	991
SPNCRNA.1166	3.02388	1.66279	20.7198	1.05462e-07	1.52321e-05	7.79836	26	31	23	231	230	204
SPAC821.04c	0.870371	7.09199	20.4872	1.14292e-07	1.61406e-05	8.5279	2599	2478	2287	4601	4654	4339
SPCC1620.06c	-0.863995	7.13295	-20.1792	1.27302e-07	1.75871e-05	8.41244	4726	4758	4331	2545	2641	2479
SPAC688.04c	1.26392	6.18007	19.8018	1.45606e-07	1.81369e-05	8.29913	1240	1167	1013	2685	2791	2805
SPBC21C3.18	-0.993334	5.00559	-19.9703	1.37088e-07	1.81369e-05	8.42676	1106	1137	1061	573	549	554
SPBC3E7.02c	3.36554	6.96525	19.7698	1.47288e-07	1.81369e-05	8.334	1062	1164	681	9305	9952	10354
SPBC4F6.17c	0.939583	7.84966	19.783	1.46593e-07	1.81369e-05	8.28781	4098	4055	3990	7721	8127	7687
SPBC660.07	1.24402	7.11821	19.8005	1.45673e-07	1.81369e-05	8.2754	2361	2299	1943	5114	5356	5283
SPNCRNA.322	1.87466	5.92425	19.7488	1.48406e-07	1.81369e-05	8.30649	739	876	705	2855	2655	3072
SPAC4D7.02c	1.35566	6.54423	19.6106	1.56004e-07	1.86888e-05	8.21162	1562	1481	1229	3658	3842	3508
SPCC285.17	-1.04424	7.6009	-19.5616	1.58803e-07	1.86888e-05	8.19132	6800	6571	6949	3451	3354	3162
SPAPJ695.02	3.19532	4.80347	19.3089	1.74178e-07	1.95463e-05	8.21344	190	296	199	2043	2352	1859
SPBC365.12c	1.24727	6.00504	19.2912	1.75317e-07	1.95463e-05	8.11086	1010	1034	994	2327	2624	2347
SPCPB16A4.04c	-0.75319	6.24343	-19.3486	1.71654e-07	1.95463e-05	8.11432	2450	2407	2314	1464	1425	1409
SPAC1751.01c	1.30084	6.55702	19.1298	1.861e-07	1.98292e-05	8.02185	1459	1391	1526	3638	3849	3409
SPAC26F1.04c	1.16311	6.17849	18.7752	2.12551e-07	1.98292e-05	7.89428	1241	1194	1096	2561	2873	2562
SPAC3F10.16c	-0.735399	7.7866	-18.9065	2.02289e-07	1.98292e-05	7.93304	7039	7046	6687	4373	4168	4070
SPAC637.03	2.63131	5.62604	18.75	2.14587e-07	1.98292e-05	7.95674	515	553	391	2994	3528	2611
SPAC823.03	0.885107	7.23513	18.7646	2.13403e-07	1.98292e-05	7.86044	2831	2801	2464	5019	5053	5009
SPBC106.11c	0.713447	6.81775	18.9095	2.02064e-07	1.98292e-05	7.92023	2195	2199	2031	3610	3579	3453
SPBC12C2.07c	-0.840727	8.22791	-18.8899	2.03552e-07	1.98292e-05	7.96497	10140	9959	9179	5775	5369	5366
SPBC27.04	0.767328	6.73231	18.9086	2.02132e-07	1.98292e-05	7.92262	2032	2063	1851	3518	3432	3272
SPBC776.08c	-0.910933	7.05781	-19.1855	1.82301e-07	1.98292e-05	8.02852	4469	4368	4480	2501	2365	2295
SPBPB21E7.04c	3.21213	3.38794	18.8075	2.09976e-07	1.98292e-05	7.93574	92	78	80	884	832	649
SPCC417.08	-1.43826	11.3276	-18.7206	2.16994e-07	1.98292e-05	7.94798	107521	106201	95238	38579	38057	38341
SPNCRNA.1517	-0.83269	8.23474	-18.7033	2.18418e-07	1.98292e-05	7.89051	10168	9978	9190	5813	5410	5411
SPNCRNA.626	1.49659	3.41997	18.7973	2.10784e-07	1.98292e-05	8.00023	170	152	142	436	454	434
SPAC13G6.11c	-0.694425	6.87107	-18.543	2.32181e-07	2.03393e-05	7.76913	3723	3688	3449	2334	2231	2214
SPAC3A11.10c	1.20306	7.08805	18.498	2.36218e-07	2.03393e-05	7.75569	2185	2111	2243	4859	5262	5089
SPBC2D10.05	1.04247	5.48646	18.4218	2.43239e-07	2.03393e-05	7.79513	795	810	677	1607	1613	1522
SPCC1223.03c	1.08508	5.6735	18.4354	2.41965e-07	2.03393e-05	7.78754	845	907	804	1806	1933	1741
SPCC576.17c	0.897084	5.52812	18.5563	2.31e-07	2.03393e-05	7.844	832	824	808	1541	1546	1550
SPCC830.07c	1.29957	7.45699	18.4565	2.40012e-07	2.03393e-05	7.75139	2857	2907	2427	6412	6944	6959
SPAC23C11.06c	1.0314	5.60223	18.381	2.47091e-07	2.0393e-05	7.76949	842	881	757	1743	1779	1599
SPAC328.03	1.49912	8.53844	18.3412	2.50917e-07	2.04433e-05	7.78277	5811	5753	4648	15144	15604	15281
SPBP35G2.06c	0.846998	6.27351	18.2456	2.60397e-07	2.09471e-05	7.66774	1457	1411	1338	2622	2656	2373
SPCC1672.12c	0.730057	7.43948	18.1947	2.65603e-07	2.10988e-05	7.62566	3420	3350	3065	5530	5574	5365
SPAC513.07	1.705	7.72558	18.0824	2.77523e-07	2.1508e-05	7.62727	2834	2635	3098	8940	9647	9566
SPBC8E4.04	0.880545	7.64386	18.091	2.76588e-07	2.1508e-05	7.59397	3562	3804	3391	6686	6649	6652
SPNCRNA.798	1.02387	5.58788	17.9714	2.89913e-07	2.21975e-05	7.60037	834	877	751	1716	1760	1581
SPBC530.11c	0.732109	7.83607	17.67	3.26813e-07	2.44341e-05	7.42161	4458	4418	4060	7234	7386	7074
SPNCRNA.867	1.31253	3.25265	17.6753	3.26127e-07	2.44341e-05	7.57386	153	152	135	381	375	350
SPCC16C4.03	0.708042	6.59616	17.5331	3.4532e-07	2.55176e-05	7.3494	1893	1861	1765	3032	3063	3013
SPBC29A10.01	-1.0425	7.97545	-17.4251	3.60761e-07	2.63521e-05	7.33587	8531	8617	9179	4417	4340	4172
SPNCRNA.1235	0.987656	5.78562	17.3113	3.77896e-07	2.72901e-05	7.30025	946	1017	895	1899	2011	1816
SPBC947.04	1.442	7.44825	17.1677	4.00834e-07	2.8371e-05	7.20346	2410	2546	2783	6976	7062	7159
SPCC11E10.01	0.811111	7.57497	17.1619	4.01792e-07	2.8371e-05	7.18502	3704	3636	3176	6389	6212	6010
SPBPB2B2.01	1.32593	6.27897	17.1286	4.07349e-07	2.84473e-05	7.19258	1251	1336	1010	3149	3034	2883
SPBPB2B2.10c	0.895774	4.6695	17.0608	4.18943e-07	2.8939e-05	7.28686	465	460	434	857	846	853
SPCC569.07	-1.13074	5.33225	-16.9315	4.42091e-07	3.02096e-05	7.17359	1492	1364	1493	682	665	657
SPAC869.02c	1.17992	7.74739	16.8947	4.48945e-07	3.03516e-05	7.08928	3486	3637	3288	8173	8727	7029
SPBC776.16	0.917486	5.99287	16.77	4.73086e-07	3.11625e-05	7.04107	1138	1217	1029	2212	2208	2032
SPBC887.17	-1.23	7.13286	-16.7329	4.80555e-07	3.11625e-05	6.98803	5379	4827	5482	2240	2209	2303
SPNCRNA.07	2.84147	1.10846	16.7473	4.77637e-07	3.11625e-05	6.49939	23	20	15	153	139	133
SPNCRNA.573	1.0398	5.22821	16.7965	4.67827e-07	3.11625e-05	7.12127	678	676	557	1339	1340	1282
SPAC22F8.05	1.04434	5.93741	16.6978	4.87734e-07	3.13086e-05	7.01473	1108	1105	908	2178	2235	2075
SPAC17G6.13	1.08752	7.01021	16.5264	5.24606e-07	3.24466e-05	6.88926	2063	2194	2192	4437	4734	4673
SPAC26F1.11	2.89071	4.40131	16.5066	5.29076e-07	3.24466e-05	7.09814	187	260	136	1401	1556	1300
SPAC688.13	1.11372	5.29786	16.5073	5.28912e-07	3.24466e-05	6.98546	653	625	672	1505	1460	1302
SPBP4G3.03	2.55715	1.78114	16.5728	5.14316e-07	3.24466e-05	6.79577	34	37	31	194	229	192
SPCC794.04c	1.70908	4.02616	16.4981	5.30992e-07	3.24466e-05	7.09476	215	228	213	737	806	635
SPBC354.11c	2.83547	4.85361	16.4546	5.40995e-07	3.27431e-05	7.04851	285	275	230	1583	2143	2016
SPAC13C5.04	1.03612	5.28492	16.3918	5.55791e-07	3.33212e-05	6.93187	645	673	666	1337	1375	1399
SPBC29B5.02c	0.842189	6.16585	16.2835	5.8242e-07	3.34055e-05	6.80381	1277	1304	1328	2402	2354	2323
SPBC30B4.09	1.7844	4.47543	16.2722	5.8528e-07	3.34055e-05	6.96755	293	300	280	1051	1139	868
SPBC609.03	0.759253	6.48602	16.29	5.80767e-07	3.34055e-05	6.79043	1677	1656	1689	2920	2855	2814
SPCC965.07c	1.42601	8.8429	16.2586	5.88735e-07	3.34055e-05	6.90349	7602	6941	5985	18205	20198	17142
SPNCRNA.06	2.59937	1.41631	16.2671	5.86585e-07	3.34055e-05	6.53925	25	30	23	162	176	146
SPNCRNA.645	1.04265	5.27356	16.2789	5.83582e-07	3.34055e-05	6.88088	638	665	661	1328	1368	1392
SPAC20G8.05c	0.681173	7.74307	16.1865	6.0749e-07	3.35704e-05	6.74152	4128	4225	3984	6695	6668	6618
SPBC215.11c	1.52387	6.54351	16.1878	6.0715e-07	3.35704e-05	6.75005	1306	1564	1167	3756	4170	3743
SPCC1450.12	0.818458	6.99101	16.2036	6.02984e-07	3.35704e-05	6.73358	2471	2435	2094	4173	4211	4061
SPAC9E9.07c	-0.842444	7.47228	-16.133	6.21857e-07	3.40681e-05	6.70642	5849	5606	5878	3422	3285	3072
SPNCRNA.1447	0.72918	6.79912	16.0519	6.44356e-07	3.4999e-05	6.66519	2161	2215	1938	3659	3569	3341
SPCC1742.01	2.52306	6.58541	16.003	6.58387e-07	3.5458e-05	6.69688	911	926	1094	5371	7063	4750
SPNCRNA.385	3.61338	0.591504	15.9639	6.69826e-07	3.57709e-05	5.84228	10	14	7	136	133	119
SPAC1F8.06	2.3054	6.54654	15.7802	7.26772e-07	3.60831e-05	6.58065	1040	1207	846	5086	6123	4278
SPAC56E4.04c	-1.1253	9.41205	-15.8012	7.19991e-07	3.60831e-05	6.73913	24220	23342	25810	11639	11488	10883
SPAC56F8.09	-0.923187	6.05714	-15.8539	7.03276e-07	3.60831e-05	6.60674	2312	2270	2107	1317	1114	1139
SPBC1734.01c	-0.751558	7.71406	-15.808	7.17824e-07	3.60831e-05	6.55928	6922	6815	6153	4181	4062	3691
SPBC29A10.08	1.21163	9.62305	15.8838	6.93997e-07	3.60831e-05	6.79367	13177	13366	11356	28261	29588	30533
SPBC29A10.09c	1.22456	9.35929	15.8589	7.01717e-07	3.60831e-05	6.76234	10970	11044	9414	23366	24839	25756
SPBC31E1.04	0.654564	6.53341	15.8345	7.09401e-07	3.60831e-05	6.56975	1832	1801	1749	2995	2873	2699
SPBC428.10	0.830098	6.48292	15.8244	7.12596e-07	3.60831e-05	6.56868	1579	1678	1634	2927	2993	2864
SPBPB2B2.12c	1.98851	3.9682	15.7811	7.2648e-07	3.60831e-05	6.78096	199	235	147	786	798	717
SPBC2F12.05c	0.925409	7.85321	15.755	7.34984e-07	3.61864e-05	6.55206	4332	4315	3626	7858	7851	7762
SPNCRNA.607	2.24721	6.41258	15.7391	7.4024e-07	3.61864e-05	6.56466	975	1102	795	4494	5493	3843
SPNCRNA.1567	0.924751	5.83057	15.7093	7.50207e-07	3.63936e-05	6.55508	1074	1063	883	1983	1951	1846
SPBC660.06	1.09271	7.55263	15.6077	7.85269e-07	3.78059e-05	6.46549	3340	3330	2741	6503	6841	6855
SPNCRNA.1366	1.76404	5.29571	15.4702	8.35753e-07	3.99339e-05	6.51448	471	513	575	1783	1631	1924
SPBC1709.01	0.750039	5.08147	15.1927	9.49272e-07	4.46861e-05	6.37335	642	659	602	1104	1056	1074
SPBC2F12.13	0.803759	7.05524	15.2016	9.45404e-07	4.46861e-05	6.24165	2609	2558	2191	4325	4333	4286
SPCC126.09	0.61205	7.51029	15.1053	9.88582e-07	4.61944e-05	6.19602	3770	3612	3377	5755	5610	5251
SPCC1183.09c	0.67835	6.61822	14.9825	1.04696e-06	4.85652e-05	6.14138	1989	1954	1727	3091	3116	2950
SPBPB2B2.11	1.93878	3.97591	14.9503	1.06294e-06	4.89493e-05	6.38892	204	242	149	777	789	708
SPBP8B7.24c	0.716729	6.11165	14.9328	1.0717e-06	4.89977e-05	6.14185	1404	1342	1193	2213	2214	2105
SPNCRNA.802	1.47226	3.19407	14.9172	1.07961e-06	4.90067e-05	6.4006	144	148	110	382	374	367
SPAC13F5.07c	1.53879	3.25394	14.854	1.11231e-06	5.01328e-05	6.37033	144	155	111	405	397	396
SPNCRNA.31	3.3584	1.33065	14.8295	1.1253e-06	5.03609e-05	5.90332	24	22	12	194	217	184
SPNCRNA.1042	-0.702505	6.12774	-14.7692	1.15792e-06	5.14584e-05	6.05579	2209	2197	2098	1451	1338	1254
SPAC57A10.03	-0.84464	5.80018	-14.7085	1.1919e-06	5.22379e-05	6.05229	1870	1743	1833	1094	1008	963
SPAPB1E7.05	0.830573	6.19195	14.7091	1.19157e-06	5.22379e-05	6.02257	1421	1394	1191	2403	2360	2420
SPAC1039.02	-2.31218	7.13833	-14.6524	1.2243e-06	5.24232e-05	6.01539	9060	8859	5560	1550	1466	1636
SPAC23C11.05	-1.65003	9.30106	-14.6164	1.24562e-06	5.24232e-05	6.15269	29805	30150	22376	8240	8607	9384
SPBC1604.01	0.906012	5.75026	14.6813	1.20751e-06	5.24232e-05	6.04508	975	951	940	1843	1946	1649
SPBC23E6.05	-0.609398	7.80106	-14.6341	1.2351e-06	5.24232e-05	5.96857	6832	6969	6300	4477	4433	4389
SPBC359.04c	-2.02371	4.26196	-14.6302	1.2374e-06	5.24232e-05	6.20873	980	886	959	304	194	214
SPNCRNA.1499	2.01489	1.64282	14.6201	1.24342e-06	5.24232e-05	6.0741	40	39	33	151	147	164
SPAC458.04c	1.47574	2.99789	14.5816	1.26664e-06	5.29574e-05	6.24219	127	126	97	350	320	312
SPACUNK4.11c	-0.919655	4.81275	-14.5307	1.29811e-06	5.39183e-05	6.07181	966	987	868	550	479	478
SPCC290.02	-0.622314	6.45806	-14.4942	1.32119e-06	5.45207e-05	5.8928	2697	2756	2504	1833	1697	1692
SPAC1B2.06	-1.17254	3.45624	-14.4685	1.33779e-06	5.48494e-05	6.17431	414	387	400	190	186	162
SPAC22F3.12c	1.37931	5.67103	14.4414	1.3555e-06	5.52191e-05	5.94083	776	676	863	2058	2057	1934
SPAC15A10.05c	0.913468	4.90678	14.3835	1.39421e-06	5.56355e-05	5.98372	506	566	522	1027	992	1012
SPCC1739.05	-0.770462	6.01248	-14.3739	1.40074e-06	5.56355e-05	5.85672	2102	2191	1866	1284	1201	1158
SPCC285.04	1.01449	4.65954	14.3874	1.39153e-06	5.56355e-05	6.01853	419	477	402	905	852	889
SPNCRNA.1157	1.17574	3.42777	14.3899	1.38986e-06	5.56355e-05	6.13707	167	175	179	416	381	393
SPCC70.04c	1.40959	3.88084	14.3294	1.43153e-06	5.65052e-05	6.07829	218	223	217	648	617	510
SPAC1039.01	-1.1258	5.50825	-14.2093	1.51849e-06	5.88044e-05	5.8261	1652	1548	1707	822	774	678
SPAC27F1.05c	1.27104	5.84256	14.1864	1.53577e-06	5.88044e-05	5.78398	873	943	877	2061	2111	2409
SPBC13G1.04c	-0.86986	4.97398	-14.1861	1.53597e-06	5.88044e-05	5.86965	1056	1059	983	627	532	556
SPCC663.06c	1.58896	4.86263	14.186	1.53604e-06	5.88044e-05	5.90275	407	417	398	1241	1432	1068
SPNCRNA.627	1.64438	1.87418	14.1905	1.53267e-06	5.88044e-05	5.96263	52	46	52	163	163	150
SPAC22E12.03c	0.923475	6.10839	14.159	1.55669e-06	5.88855e-05	5.73722	1210	1330	1119	2264	2351	2386
SPCC132.04c	0.71742	6.35829	14.1697	1.5485e-06	5.88855e-05	5.72494	1627	1629	1416	2618	2687	2450
SPAC1296.03c	0.967874	5.47605	14.1086	1.59609e-06	6.00185e-05	5.77176	787	855	685	1538	1497	1552
SPBC4F6.12	0.735536	6.21171	14.0512	1.6423e-06	6.1393e-05	5.66891	1472	1467	1257	2352	2415	2280
SPNCRNA.1316	-0.731593	5.55852	-14.025	1.6639e-06	6.18367e-05	5.71071	1493	1441	1493	927	890	876
SPAC823.08c	-0.734446	7.26939	-14.0017	1.68333e-06	6.21952e-05	5.60819	4820	4852	4832	3138	2792	2891
SPBC3D6.16	1.9021	2.7744	13.9691	1.71104e-06	6.25954e-05	5.94142	75	90	93	325	359	291
SPNCRNA.1233	-0.906797	5.85912	-13.9658	1.71386e-06	6.25954e-05	5.65168	1880	1946	1968	1011	1105	1008
SPAPJ760.03c	-0.828796	7.81872	-13.903	1.76879e-06	6.35066e-05	5.58422	7514	7556	6885	4397	3853	4246
SPBC32C12.03c	-0.7006	6.50399	-13.9124	1.76044e-06	6.35066e-05	5.57659	2894	2720	2822	1789	1706	1749
SPBC32F12.10	0.853976	8.8415	13.9127	1.76017e-06	6.35066e-05	5.7232	8232	8235	8401	14924	15300	15219
SPBC1711.12	0.544622	7.57858	13.8602	1.8073e-06	6.38799e-05	5.53523	3938	3977	3631	5763	5770	5477
SPCC965.08c	-1.10448	3.85651	-13.8607	1.8069e-06	6.38799e-05	5.83219	557	529	465	266	229	233
SPSNORNA.15	3.09964	1.18417	13.858	1.80934e-06	6.38799e-05	5.51767	22	20	14	176	181	136
SPBC1289.16c	0.822607	5.86842	13.8342	1.83127e-06	6.39435e-05	5.5772	1065	1093	1044	1898	2055	1778
SPNCRNA.780	1.12389	3.69913	13.8368	1.82886e-06	6.39435e-05	5.8347	220	215	205	448	503	462
SPAC23C11.03	-0.566203	6.80856	-13.7811	1.88111e-06	6.50976e-05	5.49017	3345	3347	3251	2367	2217	2204
SPSNORNA.24	2.64478	1.23148	13.7773	1.88481e-06	6.50976e-05	5.55134	27	24	17	141	135	157
SPAC890.05	-0.760784	6.20696	-13.7454	1.91561e-06	6.57847e-05	5.50029	2375	2354	2282	1528	1391	1271
SPNCRNA.1690	0.822257	5.84601	13.7353	1.92541e-06	6.57847e-05	5.52445	1049	1076	1028	1865	2025	1752
SPBC3H7.06c	0.709011	6.02691	13.6966	1.96381e-06	6.67382e-05	5.48523	1248	1261	1208	1985	2120	2037
SPAC1952.02	-0.626157	6.56379	-13.6689	1.9918e-06	6.69731e-05	5.43751	2961	2780	2829	1955	1884	1773
SPCC1620.05	-0.571745	7.6589	-13.669	1.99166e-06	6.69731e-05	5.43235	5974	6093	5892	4118	4111	3984
SPBC359.01	-0.873264	5.41125	-13.632	2.02975e-06	6.78898e-05	5.51412	1515	1359	1331	815	808	697
SPBC21H7.05	-0.59232	6.09398	-13.5417	2.12622e-06	7.03756e-05	5.39131	2097	2104	1917	1405	1328	1365
SPCC1450.13c	0.625588	5.59368	13.5509	2.11613e-06	7.03756e-05	5.44272	1003	963	871	1515	1490	1415
SPAC977.18	4.44263	-0.617886	13.5056	2.16628e-06	7.13301e-05	4.26955	2	4	3	88	73	63
SPAC1565.05	-0.52294	7.32871	-13.4355	2.24643e-06	7.33553e-05	5.28696	4861	4669	4522	3416	3229	3236
SPBC4F6.09	-1.35015	7.6866	-13.4317	2.25087e-06	7.33553e-05	5.334	8310	8668	7101	3755	2986	2830
SPAPJ691.02	1.43103	3.85812	13.3997	2.28865e-06	7.40471e-05	5.59047	211	202	231	586	646	525
SPCC1494.07	-0.540164	7.42651	-13.394	2.2954e-06	7.40471e-05	5.26556	5160	4982	4980	3594	3513	3404
SPCC330.07c	-1.41337	5.68054	-13.3642	2.33133e-06	7.48263e-05	5.34901	1940	1897	2287	805	743	766
SPBC1105.14	0.959747	6.02886	13.3481	2.35106e-06	7.50803e-05	5.29198	1105	1173	1135	2099	2300	2313
SPCC191.01	1.35952	4.95174	13.3132	2.39442e-06	7.60825e-05	5.40575	418	471	526	1243	1283	1125
SPAC15E1.02c	0.628683	5.48354	13.2929	2.41997e-06	7.65121e-05	5.30858	932	877	816	1407	1394	1299
SPAC19G12.09	1.79883	7.17097	13.2555	2.4681e-06	7.76473e-05	5.22275	2058	2249	1426	6645	6799	6373
SPAC17G8.14c	0.603381	7.05619	13.2133	2.52357e-06	7.90014e-05	5.16056	2644	2606	2620	4012	4102	3969
SPAC16C9.05	0.758131	7.37672	13.1876	2.55807e-06	7.93e-05	5.15113	3313	3285	2749	5513	5386	5035
SPAC22E12.02	0.706548	6.57372	13.1947	2.54841e-06	7.93e-05	5.16688	1844	1909	1688	2909	3010	3046
SPAC23C11.04c	-0.535867	7.00335	-13.1719	2.57935e-06	7.95716e-05	5.1369	3806	3755	3700	2726	2576	2549
SPCC338.12	1.6892	5.57663	13.1006	2.67887e-06	8.22427e-05	5.22042	710	764	493	2000	2142	2184
SPBC17D1.06	-0.792538	8.61717	-13.0855	2.70041e-06	8.25055e-05	5.22565	12512	12128	13028	7613	7200	7184
SPBC11C11.06c	1.36225	7.55704	13.0755	2.71483e-06	8.25491e-05	5.1197	3114	3233	2307	7533	7471	7244
SPAC29B12.10c	-1.06736	7.64472	-13.0216	2.79406e-06	8.38355e-05	5.07838	7899	7010	6308	3182	3690	3325
SPAC2F3.09	0.827259	9.38515	13.0067	2.81647e-06	8.38355e-05	5.28461	12658	12308	11657	20910	23156	21591
SPAC694.04c	-0.567442	6.34893	-12.9763	2.86267e-06	8.38355e-05	5.04821	2463	2468	2305	1753	1593	1590
SPAC6F12.12	0.73072	7.39374	12.9795	2.85791e-06	8.38355e-05	5.02861	3187	3058	3274	5544	5370	5054
SPBC29A3.16	-0.705008	6.89485	-13.0169	2.80119e-06	8.38355e-05	5.04966	3688	3767	3622	2510	2186	2183
SPCC1919.15	0.883725	6.50231	12.9967	2.83167e-06	8.38355e-05	5.05618	1612	1550	1707	3204	3084	2794
SPNCRNA.1276	0.884327	6.50201	12.9827	2.85291e-06	8.38355e-05	5.04796	1610	1550	1707	3204	3084	2794
SPNCRNA.1695	2.46355	1.84758	12.9901	2.84161e-06	8.38355e-05	5.36446	44	40	28	204	239	183
SPAC32A11.04c	-0.790525	8.83925	-12.9266	2.94021e-06	8.54392e-05	5.1661	15565	15514	13000	8941	8591	8131
SPAC926.08c	-0.682907	7.94838	-12.924	2.94432e-06	8.54392e-05	5.03249	7846	7904	7093	5171	4558	4651
SPNCRNA.1116	0.741826	6.05548	12.913	2.96193e-06	8.55594e-05	5.03215	1215	1343	1195	2108	2207	2023
SPNCRNA.1096	-0.872981	6.25536	-12.8942	2.99209e-06	8.60395e-05	5.00859	2597	2551	2392	1532	1250	1389
SPBP26C9.02c	0.965479	6.3516	12.8703	3.03104e-06	8.67669e-05	4.9906	1499	1530	1246	2715	2753	2945
SPAC26F1.14c	1.16316	5.8107	12.8324	3.09378e-06	8.77126e-05	5.01747	903	866	968	1902	2190	2102
SPBC25B2.08	0.852027	5.26773	12.8379	3.08452e-06	8.77126e-05	5.07523	732	667	692	1296	1357	1165
SPCC613.07	-0.721856	5.28465	-12.8255	3.10548e-06	8.77126e-05	5.06195	1253	1244	1154	818	708	713
SPBC16D10.08c	1.69052	6.83948	12.7908	3.16447e-06	8.89833e-05	4.93856	1361	1502	1821	4667	5228	5270
SPAC18B11.06	-0.666701	6.60805	-12.7405	3.25234e-06	9.02559e-05	4.89576	3153	3081	2741	2058	1833	1820
SPAC19G12.15c	0.619448	8.59916	12.7425	3.2489e-06	9.02559e-05	5.01922	7795	7604	7412	11740	12228	11453
SPBPB2B2.13	1.5851	6.3228	12.7444	3.24545e-06	9.02559e-05	4.93079	1245	1318	859	3372	3374	3479
SPCC1235.13	-1.35141	6.03589	-12.7258	3.27856e-06	9.05879e-05	4.93606	2367	2430	2874	1088	992	948
SPNCRNA.1213	1.21068	4.78369	12.7171	3.29427e-06	9.06282e-05	5.07879	461	468	393	1019	1159	922
SPAC4H3.04c	1.30217	3.33863	12.6895	3.34446e-06	9.12419e-05	5.24145	160	174	136	372	390	409
SPCC1682.08c	-0.492684	6.58726	-12.689	3.3453e-06	9.12419e-05	4.86416	2897	2752	2669	2058	1990	1924
SPAC806.07	0.697784	5.8981	12.674	3.37286e-06	9.16007e-05	4.90181	1198	1183	1037	1845	1845	1906
SPBC1271.09	1.94373	5.16639	12.6491	3.4193e-06	9.24666e-05	5.0149	403	396	553	1599	1944	1654
SPAC694.03	-0.548945	6.50719	-12.6228	3.46922e-06	9.34191e-05	4.82816	2755	2763	2509	1940	1786	1816
SPBC8E4.01c	1.4245	10.2715	12.6138	3.48647e-06	9.34874e-05	5.14863	17818	16929	20363	52251	50498	46729
SPAC22A12.11	0.812554	8.04863	12.5993	3.5144e-06	9.37516e-05	4.85619	4806	4882	4879	8141	9003	8720
SPBC1105.05	0.917465	8.80497	12.5934	3.52583e-06	9.37516e-05	4.96492	8802	8059	6983	15427	15470	14381
SPAC23C4.16c	0.600769	6.37334	12.542	3.62737e-06	9.50261e-05	4.7865	1759	1669	1489	2581	2477	2464
SPBC725.10	1.06746	6.11633	12.5496	3.61229e-06	9.50261e-05	4.81517	1181	1336	998	2408	2557	2438
SPBC725.11c	0.715028	6.47703	12.5351	3.64129e-06	9.50261e-05	4.77819	1701	1789	1583	2700	2940	2772
SPCC4G3.17	-0.509671	7.41713	-12.5344	3.64264e-06	9.50261e-05	4.75496	5134	4873	4862	3575	3517	3460
SPNCRNA.499	2.44665	1.0284	12.5315	3.64853e-06	9.50261e-05	4.96709	26	20	17	113	109	129
SPCC306.07c	-0.52979	6.28507	-12.4856	3.7427e-06	9.66865e-05	4.75608	2309	2368	2157	1615	1578	1587
SPNCRNA.629	0.765526	5.56257	12.4919	3.72964e-06	9.66865e-05	4.82883	925	924	797	1479	1506	1556
SPBC1921.05	0.54656	8.46968	12.4443	3.82978e-06	9.85355e-05	4.81703	7382	7156	6855	10605	10745	10216
SPBC1703.05	-0.592514	6.86735	-12.4289	3.86289e-06	9.8589e-05	4.69496	3612	3591	3259	2526	2274	2214
SPCC191.11	0.714761	6.1283	12.4333	3.8534e-06	9.8589e-05	4.73648	1283	1368	1330	2206	2153	2241
SPAC18G6.12c	0.622996	6.35692	12.3629	4.00822e-06	0.000101889	4.67747	1573	1647	1595	2639	2514	2346
SPAC343.20	1.55807	8.67389	12.3244	4.09595e-06	0.000103281	4.7959	5883	6847	4811	16430	18398	16825
SPBC215.06c	-0.710496	6.27104	-12.3274	4.08894e-06	0.000103281	4.66115	2547	2536	2140	1572	1446	1432
SPNCRNA.889	-1.01849	5.32812	-12.3176	4.11173e-06	0.000103281	4.75703	1468	1509	1209	762	647	674
SPAC227.02c	-0.798155	5.58358	-12.2868	4.18367e-06	0.000104396	4.70033	1512	1557	1542	960	923	801
SPNCRNA.1287	1.19207	3.4905	12.2845	4.189e-06	0.000104396	4.99014	188	203	153	437	433	383
SPCC736.02	-0.685179	4.87564	-12.2508	4.26965e-06	0.000105991	4.7717	945	872	897	573	574	557
SPAC1486.01	0.947818	8.3334	12.2208	4.34293e-06	0.00010739	4.66785	6139	6035	4858	11042	11121	10821
SPAC4F8.04	-0.662558	7.34144	-12.1457	4.53233e-06	0.000111639	4.51526	4961	5200	4724	3471	3090	2955
SPBPJ4664.02	-0.899526	5.64385	-12.1258	4.58408e-06	0.000112478	4.59549	1745	1556	1682	962	829	909
SPAC343.12	1.55634	8.76428	12.0681	4.73817e-06	0.000114928	4.64809	6262	7313	5117	17494	19744	17734
SPAC631.02	0.519687	7.8607	12.0723	4.72679e-06	0.000114928	4.49606	4738	4800	4615	6917	6755	6828
SPCC31H12.05c	-0.675612	6.62959	-12.0687	4.73643e-06	0.000114928	4.47968	3045	2949	3131	2027	1912	1835
SPAC23A1.03	-0.712546	7.76967	-12.041	4.81254e-06	0.000116127	4.47263	7161	7278	6008	4320	4072	4163
SPAC589.07c	0.770542	4.46674	12.0368	4.82416e-06	0.000116127	4.70279	426	392	416	737	724	666
SPAC1565.01	0.757514	8.38388	11.9665	5.02363e-06	0.000116515	4.50982	6146	6158	6424	10517	10821	10663
SPAC1565.02c	0.522883	5.69439	12.0097	4.89998e-06	0.000116515	4.50808	1082	1088	981	1591	1520	1463
SPAC23H4.06	-0.865292	7.43258	-11.9874	4.96345e-06	0.000116515	4.42353	5880	5187	5956	3130	3188	3113
SPAPB24D3.01	-0.550416	6.92011	-11.9693	5.01555e-06	0.000116515	4.40428	3568	3528	3587	2508	2445	2418
SPBC1347.13c	-0.714865	5.12214	-12.0155	4.88354e-06	0.000116515	4.58897	1150	1122	986	717	639	648
SPBC26H8.06	-0.557385	8.00876	-12.0065	4.90884e-06	0.000116515	4.4729	8016	7884	6931	5290	5237	5108
SPBC28F2.02	-0.463001	7.8319	-11.9874	4.96339e-06	0.000116515	4.43676	6669	6705	6142	4882	4786	4629
SPBC56F2.06	1.66143	3.28963	11.9698	5.01405e-06	0.000116515	4.83208	147	161	99	426	446	411
SPBC725.03	1.34265	4.57384	11.97	5.01354e-06	0.000116515	4.65842	346	333	416	878	962	952
SPNCRNA.995	0.975517	3.17826	11.9706	5.0118e-06	0.000116515	4.83091	172	150	148	309	316	309
SPBC30B4.07c	-0.543168	5.53135	-11.9581	5.04816e-06	0.000116658	4.49413	1392	1353	1325	993	938	892
SPBC1685.14c	0.697231	5.8757	11.9262	5.14209e-06	0.000118399	4.43959	1180	1171	1016	1828	1951	1735
SPAC29E6.06c	-0.47945	8.09829	-11.9152	5.17517e-06	0.00011873	4.4251	8125	8035	7448	5821	5660	5615
SPCC1020.05	0.725385	6.41858	11.9083	5.19581e-06	0.000118775	4.38875	1684	1541	1627	2621	2843	2642
SPBC11B10.10c	-0.506712	6.39201	-11.9014	5.21692e-06	0.00011883	4.38297	2535	2517	2254	1777	1707	1706
SPAC3A12.13c	-0.512451	7.61633	-11.8877	5.25866e-06	0.000119001	4.35696	5862	5939	5305	4104	3972	4025
SPBC1683.05	-0.856101	7.13165	-11.8866	5.26188e-06	0.000119001	4.35137	4723	4308	4734	2837	2465	2396
SPBC6B1.12c	-0.834835	4.62974	-11.841	5.40353e-06	0.00012111	4.55556	871	839	707	462	455	448
SPBC947.07	-0.671214	6.0869	-11.8382	5.41232e-06	0.00012111	4.3638	2160	2177	1925	1451	1301	1224
SPNCRNA.560	0.783693	3.93079	11.8479	5.38186e-06	0.00012111	4.66288	284	283	279	486	512	475
SPCC550.15c	-0.489156	7.96888	-11.7731	5.6225e-06	0.000125372	4.31577	7436	7444	6780	5370	5091	5118
SPAC17C9.11c	0.614722	6.52341	11.7586	5.67069e-06	0.000125953	4.28541	1887	1900	1642	2753	2837	2796
SPAC19D5.03	0.524087	5.79296	11.7481	5.70595e-06	0.000125953	4.32993	1157	1114	1099	1675	1595	1627
SPBC405.01	-0.589013	8.9147	-11.7416	5.72785e-06	0.000125953	4.44983	14816	14332	14003	9960	9897	9155
SPCC16C4.08c	-0.513417	6.97225	-11.7468	5.71023e-06	0.000125953	4.25913	3808	3565	3567	2712	2521	2512
SPNCRNA.29	1.77357	2.44723	11.732	5.76024e-06	0.000126229	4.74222	79	77	59	267	215	264
SPCC2H8.04	-0.739028	4.32282	-11.6932	5.89358e-06	0.000128707	4.50699	651	630	603	398	356	387
SPBC11G11.03	-0.593284	8.25298	-11.6754	5.95579e-06	0.000128971	4.29653	9329	9565	8463	6405	5858	6041
SPBC1271.01c	0.595979	5.00404	11.6822	5.93188e-06	0.000128971	4.39227	634	656	612	965	983	957
SPCC663.08c	1.39982	4.48662	11.6723	5.96656e-06	0.000128971	4.48497	353	379	280	881	1019	797
SPBC17A3.08	-0.597603	5.56638	-11.6531	6.03487e-06	0.000130002	4.29452	1512	1395	1346	1007	911	921
SPNCRNA.920	1.15861	3.94075	11.6474	6.05516e-06	0.000130002	4.54269	287	256	210	596	525	572
SPAC1006.01	0.934877	7.43262	11.6248	6.13708e-06	0.000130445	4.19217	2909	2910	3307	5878	5897	5816
SPAC9.08c	1.40689	6.85042	11.6302	6.11724e-06	0.000130445	4.20075	1617	1541	2051	4614	4739	4483
SPNCRNA.144	1.7412	0.859982	11.6247	6.1374e-06	0.000130445	4.52931	22	25	24	80	85	78
SPNCRNA.1310	-2.75824	1.37733	-11.6092	6.19422e-06	0.000131214	4.57275	177	188	132	32	24	18
SPBC354.05c	-0.428104	6.92692	-11.5971	6.23871e-06	0.000131718	4.16206	3507	3496	3289	2669	2569	2491
SPAC3H1.10	-0.452117	6.20963	-11.5847	6.28505e-06	0.000131808	4.18772	2145	2155	2012	1605	1537	1519
SPBC1198.12	0.900676	4.04727	11.5793	6.30524e-06	0.000131808	4.47853	277	314	291	572	530	561
SPCC1223.10c	0.752734	6.35758	11.5831	6.29101e-06	0.000131808	4.18098	1458	1558	1592	2589	2631	2618
SPBC317.01	0.801041	6.52995	11.5712	6.33589e-06	0.000132015	4.16436	1677	1847	1588	3052	3234	2721
SPBC800.08	-0.517795	6.33436	-11.5552	6.3967e-06	0.000132847	4.16094	2398	2410	2234	1761	1668	1544
SPCC737.07c	-0.619982	6.3962	-11.5479	6.42463e-06	0.000132992	4.15358	2594	2551	2468	1839	1603	1573
SPBC1685.12c	0.756219	5.77924	11.5349	6.47454e-06	0.00013359	4.19669	1128	1075	890	1783	1783	1695
SPAC139.05	0.602934	4.66774	11.5237	6.51817e-06	0.000133741	4.34216	509	519	475	777	790	740
SPNCRNA.866	1.05602	3.2054	11.5222	6.52397e-06	0.000133741	4.55404	157	153	155	317	356	307
SPBP4H10.15	-0.663613	9.55042	-11.5092	6.5751e-06	0.000134356	4.38925	23628	23485	21746	14465	14866	14549
SPBC23E6.10c	-0.730613	6.85921	-11.4883	6.65788e-06	0.000135612	4.09377	3832	3903	3207	2319	2116	2208
SPBP4H10.12	0.625419	5.52715	11.4427	6.84289e-06	0.000138935	4.16234	955	950	807	1420	1418	1382
SPAC8F11.10c	-0.672062	8.47447	-11.3934	7.04976e-06	0.000142638	4.14926	10979	11157	10600	7163	6515	7097
SPBC1709.11c	0.536673	6.14659	11.3886	7.07015e-06	0.000142638	4.06297	1511	1472	1311	2141	2157	1991
SPCC4G3.03	0.932467	3.73193	11.3496	7.23924e-06	0.000145587	4.37621	220	234	247	455	461	434
SPAC4A8.05c	0.561017	6.86803	11.3326	7.31404e-06	0.000145708	3.98841	2435	2453	2135	3645	3562	3256
SPBC216.02	1.01996	4.9935	11.3376	7.2922e-06	0.000145708	4.17687	532	500	604	1163	1068	1108
SPBC244.02c	-0.538054	6.99164	-11.3361	7.29868e-06	0.000145708	3.98691	3917	3776	3497	2791	2487	2511
SPAC4A8.04	0.970313	7.03845	11.2945	7.48584e-06	0.000147109	3.96397	2191	2209	2456	4268	4807	4491
SPAPB1E7.06c	0.558275	6.1268	11.2912	7.50062e-06	0.000147109	3.99925	1366	1426	1406	2155	2065	2026
SPAPB8E5.04c	0.661186	7.95428	11.3013	7.45461e-06	0.000147109	4.00866	4745	4684	4948	7831	7837	7322
SPBC1773.03c	0.551232	5.50153	11.2813	7.54642e-06	0.000147109	4.05598	943	885	900	1362	1335	1341
SPBC776.09	-0.685805	8.97666	-11.2839	7.53414e-06	0.000147109	4.1605	15536	15027	16007	10141	9723	9423
SPBC947.15c	0.576276	7.90241	11.2864	7.52267e-06	0.000147109	3.98899	5074	4922	4324	7147	7262	7106
SPBP8B7.26	0.964172	7.74601	11.2985	7.46765e-06	0.000147109	3.99778	3498	3826	3897	7005	7299	7793
SPAC18G6.06	-0.600792	6.67255	-11.271	7.59401e-06	0.000147531	3.95461	3066	3204	2895	2161	2096	1856
SPBC16A3.16	0.561164	5.88814	11.2666	7.61449e-06	0.000147531	4.00267	1259	1224	1077	1799	1739	1762
SPNCRNA.940	2.66277	0.550657	11.252	7.68269e-06	0.0001484	4.20594	15	10	17	98	96	77
SPAC13G7.07	-1.14104	4.28843	-11.2304	7.78491e-06	0.000149697	4.21945	722	646	751	332	298	339
SPAC3C7.14c	1.93384	10.6688	11.2278	7.79696e-06	0.000149697	4.33494	23525	23105	15321	74314	80401	79456
SPAC22E12.13c	-0.59551	7.72355	-11.2067	7.89855e-06	0.000151189	3.91632	6236	6209	6490	4287	4242	4142
SPAC56F8.14c	-0.572904	6.20672	-11.2019	7.92224e-06	0.000151189	3.93282	2216	2182	2169	1611	1464	1392
SPAC29B12.14c	0.624354	6.56939	11.1588	8.13467e-06	0.000154156	3.88375	1888	1799	1890	3105	2790	2799
SPBC32H8.05	-0.639519	7.59414	-11.1599	8.12929e-06	0.000154156	3.87709	5847	5688	6045	4042	3775	3602
SPNCRNA.1692	0.606265	5.03597	11.1557	8.15052e-06	0.000154156	4.03922	664	640	634	1066	988	930
SPAC6F12.03c	0.540077	5.56261	11.1415	8.22228e-06	0.000155052	3.95345	977	962	918	1429	1462	1310
SPBC8E4.02c	1.05981	6.39145	11.1293	8.28429e-06	0.000155759	3.87911	1280	1391	1585	3002	2988	2933
SPAC3C7.05c	0.924743	5.82515	11.1022	8.42406e-06	0.00015792	3.90546	1118	1049	849	1842	2001	1918
SPAC13C5.03	0.511586	5.23093	11.0842	8.51885e-06	0.000158568	3.95931	798	763	732	1147	1113	1044
SPAC926.09c	-0.751332	9.7189	-11.0848	8.51558e-06	0.000158568	4.13043	26241	25951	27500	16474	16071	15344
SPCC1682.11c	0.554125	6.26506	11.0814	8.53348e-06	0.000158568	3.84681	1558	1501	1568	2322	2291	2250
SPCC338.18	1.93286	2.72416	11.0696	8.5961e-06	0.000159266	4.32756	86	65	98	318	358	277
SPAC11D3.02c	-0.711704	7.47297	-11.0368	8.77303e-06	0.000161135	3.78934	5942	5910	4806	3555	3335	3336
SPAC8F11.09c	-0.471598	6.36438	-11.0431	8.73859e-06	0.000161135	3.81339	2352	2445	2277	1746	1707	1700
SPCC1235.01	1.49726	9.95647	11.0413	8.74881e-06	0.000161135	4.13563	15670	15724	12058	41320	48669	34200
SPAPB18E9.04c	1.1921	6.48859	11.0148	8.89418e-06	0.000162889	3.79683	1626	1549	1191	3121	3285	3616
SPBC16H5.12c	0.78598	8.15551	11.0101	8.92023e-06	0.000162897	3.8429	5098	5211	5528	8998	9367	9220
SPBC25B2.09c	-0.578744	8.92871	-10.9834	9.06993e-06	0.000165156	3.94927	14587	14437	14378	10285	9573	9541
SPCPB1C11.02	0.749589	3.55021	10.944	9.29643e-06	0.000168797	4.13176	231	226	201	375	375	368
SPAC513.05	0.4918	6.48947	10.9334	9.35854e-06	0.000168959	3.73109	1893	1792	1839	2670	2621	2557
SPNCRNA.707	0.723903	3.53227	10.9336	9.35776e-06	0.000168959	4.12685	222	218	215	374	370	350
SPBC4F6.13c	-0.495825	8.292	-10.9153	9.46573e-06	0.000169928	3.78961	9097	9056	8971	6737	6394	6324
SPCC663.15c	0.479288	7.84567	10.9176	9.45197e-06	0.000169928	3.72655	4801	4888	4522	6643	6648	6712
SPAC20G8.03	0.613094	8.92632	10.8983	9.56732e-06	0.00017087	3.89069	9684	9426	9559	14819	15342	14196
SPNCRNA.1153	1.50858	4.72622	10.8975	9.57195e-06	0.00017087	3.93758	463	422	281	1125	1167	1008
SPAC1B2.03c	-0.899224	6.62166	-10.869	9.74583e-06	0.000171564	3.68346	3811	3105	2948	1913	1758	1649
SPAC25B8.05	-0.608148	4.77407	-10.8747	9.71042e-06	0.000171564	3.88922	846	850	767	549	528	555
SPAC513.06c	0.484739	6.44857	10.8846	9.65029e-06	0.000171564	3.69909	1854	1745	1784	2591	2533	2486
SPCC1672.03c	-0.625501	5.80991	-10.8724	9.72483e-06	0.000171564	3.74064	1729	1792	1564	1113	1068	1147
SPNCRNA.1304	3.21658	0.871781	10.8794	9.6819e-06	0.000171564	4.05231	17	11	15	168	142	106
SPCC1919.01	0.573863	6.42702	10.8578	9.81499e-06	0.000172305	3.68238	1725	1662	1755	2599	2626	2507
SPAC1142.04	-0.548086	8.20922	-10.8397	9.92765e-06	0.000173802	3.72428	8681	8576	8820	6248	5926	5869
SPCC16C4.06c	-0.46049	5.93936	-10.8343	9.96153e-06	0.000173916	3.69919	1783	1807	1660	1334	1305	1216
SPCC1020.07	-0.442246	6.00464	-10.8252	1.00192e-05	0.000174443	3.687	1895	1801	1761	1390	1343	1324
SPNCRNA.857	1.0127	5.36124	10.8118	1.01049e-05	0.000175456	3.7657	651	677	790	1471	1485	1343
SPAC29A4.12c	2.09557	0.908669	10.7984	1.01907e-05	0.000176462	4.08068	20	21	24	96	109	81
SPAC25B8.13c	-1.84854	5.37827	-10.793	1.02258e-05	0.00017659	3.78322	1678	1774	2374	561	541	511
SPCC1739.01	-1.08794	7.85088	-10.7744	1.03473e-05	0.000178203	3.65215	7713	7564	9341	4123	3942	3629
SPAC16E8.06c	-0.47371	7.18378	-10.7645	1.04127e-05	0.000178363	3.58898	4414	4253	3843	3193	2999	2902
SPACUNK4.17	1.1612	5.09658	10.7682	1.03884e-05	0.000178363	3.77778	504	532	642	1289	1318	1161
SPAC2C4.12c	-0.459853	6.27184	-10.7415	1.05668e-05	0.00017955	3.60851	2255	2171	2180	1647	1639	1567
SPBC1685.04	-0.593772	4.62365	-10.7438	1.05509e-05	0.00017955	3.82313	740	733	734	505	501	471
SPCC70.12c	0.847707	5.83406	10.7476	1.05256e-05	0.00017955	3.65615	1027	972	1106	1972	1961	1711
SPAC1250.04c	-1.04268	3.62553	-10.7262	1.06701e-05	0.000179864	3.97834	466	411	414	192	215	227
SPAC16.01	0.586768	6.00727	10.7302	1.06429e-05	0.000179864	3.62186	1320	1346	1166	2091	1877	1847
SPBC609.01	1.1251	3.72592	10.7323	1.06284e-05	0.000179864	3.97017	230	194	230	460	522	458
SPAC23H4.15	-0.508572	7.74543	-10.719	1.07196e-05	0.000180219	3.5772	6364	6115	6177	4712	4386	4173
SPAC17H9.05	-0.49942	8.15025	-10.7009	1.08437e-05	0.000180887	3.61608	8279	8571	7790	6163	5947	5511
SPAC688.12c	-0.834176	5.46846	-10.6967	1.08732e-05	0.000180887	3.66412	1514	1561	1253	895	782	770
SPBC1734.08	0.763588	6.17357	10.6998	1.08516e-05	0.000180887	3.58958	1331	1333	1374	2227	2256	2449
SPNCRNA.624	-0.717689	3.78529	-10.7041	1.08219e-05	0.000180887	3.93333	454	439	396	268	257	266
SPNCRNA.996	0.985535	3.02835	10.6901	1.09195e-05	0.000181184	4.03273	161	133	129	283	290	272
SPBC1D7.05	0.570468	5.55669	10.6815	1.09796e-05	0.000181707	3.63567	952	908	956	1464	1386	1374
SPNCRNA.1379	1.41542	3.7365	10.6772	1.10099e-05	0.000181736	3.93828	180	178	243	532	557	511
SPAC821.10c	-1.09289	9.26883	-10.6603	1.11297e-05	0.000183134	3.78048	24352	24304	17791	10003	10683	10401
SPAC8F11.04	-0.528495	8.44605	-10.6572	1.11523e-05	0.000183134	3.63632	10143	10298	10080	7561	7052	6806
SPNCRNA.779	0.797157	6.08716	10.6441	1.12463e-05	0.000184202	3.55727	1297	1397	1084	2252	2299	2059
SPAC3G6.04	-0.49853	6.62608	-10.6261	1.13773e-05	0.000185868	3.5077	2862	2826	2870	2134	2005	1984
SPAC4H3.02c	0.475667	5.94645	10.613	1.14738e-05	0.000186091	3.54261	1286	1328	1200	1837	1745	1775
SPBC1347.02	-0.610947	9.47421	-10.6174	1.14414e-05	0.000186091	3.77759	22354	22019	19801	14935	13823	13666
SPCC18B5.02c	1.51714	4.51669	10.6123	1.14788e-05	0.000186091	3.77353	402	363	241	967	1023	873
SPAC19G12.05	-0.476559	7.47883	-10.6032	1.15463e-05	0.000186249	3.47794	5410	5171	4778	3703	3691	3744
SPBC23G7.07c	-0.543512	6.94406	-10.602	1.15553e-05	0.000186249	3.47839	3733	3555	3551	2730	2433	2363
SPBC56F2.15	1.79325	5.45017	10.5952	1.16058e-05	0.000186249	3.63316	683	698	386	2116	1972	1925
SPNCRNA.1143	-0.604658	5.87214	-10.5967	1.15952e-05	0.000186249	3.53921	1803	1849	1619	1168	1124	1208
SPAC23A1.14c	0.448947	6.76289	10.5678	1.18132e-05	0.000188959	3.45992	2298	2322	2158	3090	3147	3109
SPCC1753.03c	-0.536005	5.30674	-10.5651	1.18341e-05	0.000188959	3.58584	1227	1172	1079	859	806	758
SPAPB1A11.02	5.56859	1.96012	10.5536	1.19228e-05	0.000189899	3.90228	11	19	11	543	871	603
SPAC1834.11c	0.549582	8.08403	10.5443	1.19944e-05	0.00019056	3.49665	5365	5584	5403	7938	8304	7945
SPAC1639.01c	0.587558	8.80919	10.5297	1.21086e-05	0.000191895	3.61218	9015	8740	8909	14123	13775	12670
SPAC18G6.15	-0.402017	7.11769	-10.5182	1.21995e-05	0.000192855	3.41354	3936	3909	3793	3060	2984	2858
SPBC4F6.16c	0.732496	7.91941	10.5063	1.2294e-05	0.000193866	3.45305	4980	4833	3950	7796	7777	7416
SPNCRNA.981	1.0166	4.12668	10.4971	1.23678e-05	0.000194548	3.74136	328	293	275	605	685	547
SPNCRNA.763	-0.50254	5.81731	-10.4805	1.25027e-05	0.000196185	3.45972	1678	1693	1526	1243	1159	1091
SPAC186.02c	4.0652	-1.25037	10.4605	1.26669e-05	0.000196874	2.9952	2	2	2	44	53	31
SPBC30D10.14	1.62098	6.52129	10.4653	1.2627e-05	0.000196874	3.41631	1484	1521	909	3996	3913	3971
SPBC83.16c	0.512385	7.90956	10.4707	1.25829e-05	0.000196874	3.41791	4933	4816	4925	7122	7246	6795
SPCC569.02c	2.14042	3.00567	10.46	1.26706e-05	0.000196874	3.90758	128	67	92	463	365	419
SPSNORNA.31	2.43974	0.198249	10.455	1.27119e-05	0.000197034	3.71547	12	9	14	72	57	67
SPNCRNA.1668	1.50027	3.10472	10.4322	1.2903e-05	0.000199026	3.85929	138	150	91	356	367	344
SPNCRNA.919	1.34155	3.04719	10.4358	1.28727e-05	0.000199026	3.86487	150	137	96	333	321	316
SPBC2G2.12	-0.399182	7.44221	-10.4241	1.2972e-05	0.000199605	3.34575	5069	4954	4551	3822	3753	3583
SPAC4G8.05	0.491655	7.08116	10.3879	1.32833e-05	0.00020341	3.32048	2789	2736	2799	3963	3956	3907
SPCC613.01	-0.592451	6.54301	-10.3912	1.32547e-05	0.00020341	3.34304	2832	2652	2867	1903	1854	1836
SPAC17H9.04c	-0.544067	8.48764	-10.3799	1.33536e-05	0.000203995	3.44546	10519	10417	10650	7514	7162	7233
SPAC25B8.06c	-0.418159	6.13522	-10.3706	1.3435e-05	0.000204747	3.35154	2057	2014	1856	1536	1474	1469
SPAC2E1P5.05	-0.381374	7.37108	-10.3496	1.36221e-05	0.000207102	3.28947	4685	4675	4417	3683	3533	3471
SPNCRNA.787	-0.676873	6.42985	-10.3355	1.37493e-05	0.000208536	3.30924	2715	2758	2482	1820	1746	1475
SPCPJ732.02c	0.500741	6.65505	10.3028	1.40495e-05	0.000212582	3.27246	2029	2060	2087	3022	2964	2845
SPBC26H8.12	0.659444	7.02372	10.2988	1.40874e-05	0.000212649	3.25751	2487	2525	2535	3837	4034	4181
SPBC713.04c	-0.406203	7.71265	-10.2817	1.42474e-05	0.000214554	3.25603	6086	5829	5693	4618	4539	4273
SPAC31A2.02	-0.490465	5.31066	-10.2551	1.45013e-05	0.00021773	3.36016	1211	1158	1063	838	812	816
SPAC637.09	-0.450779	5.89422	-10.2454	1.45953e-05	0.00021773	3.28023	1702	1695	1671	1295	1229	1223
SPBC3H7.07c	-0.561591	6.33575	-10.2484	1.45663e-05	0.00021773	3.24942	2478	2553	2141	1707	1602	1590
SPNCRNA.640	-0.577144	5.80454	-10.2486	1.45645e-05	0.00021773	3.29336	1655	1646	1676	1195	1142	1037
SPAC57A10.10c	-0.58872	8.64134	-10.2337	1.47093e-05	0.000218221	3.36773	12162	12693	10916	8556	7758	7696
SPAC824.07	0.523248	6.93822	10.228	1.47656e-05	0.000218221	3.20637	2530	2447	2480	3640	3807	3393
SPBC16A3.02c	1.2719	7.73687	10.237	1.46773e-05	0.000218221	3.26606	3794	3726	2625	7815	8564	8055
SPNCRNA.998	-0.403357	6.47525	-10.2284	1.47611e-05	0.000218221	3.22526	2544	2536	2381	1981	1859	1860
SPAC23E2.03c	1.35138	4.81671	10.216	1.48833e-05	0.000219098	3.43362	396	380	525	1176	1140	1000
SPAC4F10.02	0.467195	6.38074	10.215	1.48938e-05	0.000219098	3.22142	1732	1756	1678	2391	2395	2430
SPBPB10D8.02c	-1.64643	6.89946	-10.2068	1.49758e-05	0.000219795	3.2156	5728	4868	4846	1335	2131	1598
SPNCRNA.811	1.48135	2.38395	10.1937	1.51071e-05	0.000221212	3.76749	87	61	81	224	225	193
SPAP11E10.01	-0.504935	6.29761	-10.1868	1.51764e-05	0.000221715	3.20575	2362	2300	2171	1612	1579	1674
SPCC757.05c	-0.623333	5.79904	-10.1752	1.5295e-05	0.000222935	3.24061	1776	1683	1581	1074	1068	1165
SPAC1B9.03c	-0.436122	7.81258	-10.1672	1.53765e-05	0.000222972	3.18123	6470	6375	6216	5023	4627	4600
SPBC691.05c	0.375023	6.97833	10.1679	1.53699e-05	0.000222972	3.16016	2781	2729	2565	3638	3555	3388
SPCPB16A4.06c	1.16562	3.11756	10.1647	1.54028e-05	0.000222972	3.66226	125	146	152	325	342	290
SPCC569.08c	-0.406235	7.30293	-10.1541	1.55126e-05	0.000224052	3.14506	4505	4395	4351	3449	3337	3319
SPAC4G8.04	0.801233	7.05317	10.1439	1.56188e-05	0.000225074	3.14433	2403	2302	2641	4323	4539	4062
SPAC2C4.11c	-0.447895	7.16388	-10.1334	1.57294e-05	0.000226155	3.13067	4335	4168	3729	3069	3043	2933
SPBP16F5.05c	-0.587042	5.88993	-10.1059	1.60228e-05	0.000229852	3.179	1900	1795	1614	1294	1170	1106
SPAC1782.02c	-0.484093	5.94702	-10.101	1.60762e-05	0.000229866	3.16863	1855	1780	1687	1350	1315	1182
SPCC330.04c	0.741908	4.55382	10.0991	1.6096e-05	0.000229866	3.37612	456	487	385	766	729	743
SPAC23D3.17	0.788337	4.50041	10.0898	1.61979e-05	0.000230801	3.37938	450	417	389	723	802	671
SPBC19C2.04c	-0.685472	5.69816	-10.0818	1.6285e-05	0.000231524	3.18406	1546	1574	1683	1052	988	975
SPAC1002.12c	0.722725	6.4697	10.0665	1.64542e-05	0.000232627	3.10865	1674	1741	1615	2615	2805	2978
SPAC11E3.06	1.38048	3.4077	10.0649	1.64724e-05	0.000232627	3.55519	143	157	181	408	478	378
SPBC4F6.07c	-0.437014	7.01709	-10.067	1.64492e-05	0.000232627	3.08387	3654	3716	3616	2873	2679	2652
SPNCRNA.735	-0.464648	5.69694	-10.0458	1.66867e-05	0.00023513	3.15269	1528	1479	1436	1160	1065	1030
SPAC4F8.15	0.655151	7.90079	10.0365	1.67912e-05	0.000235315	3.10188	4493	4561	4833	7402	7638	7065
SPBC16D10.02	-0.462894	7.06261	-10.0377	1.67778e-05	0.000235315	3.06099	3761	3850	3829	2876	2813	2700
SPBC17D1.17	1.26397	6.64628	10.0348	1.68109e-05	0.000235315	3.0834	1725	1862	1203	3782	3857	3802
SPAC27E2.03c	-0.604507	9.2496	-10.0131	1.706e-05	0.000238277	3.30855	19268	18823	16729	12961	12106	11349
SPBP35G2.04c	-0.606411	4.98857	-10.0024	1.71842e-05	0.000239486	3.22654	942	970	944	679	640	578
SPAC18G6.01c	0.661846	4.69089	9.9735	1.75255e-05	0.000243176	3.2574	496	483	518	811	826	755
SPBP22H7.02c	-0.458236	6.94236	-9.97506	1.75069e-05	0.000243176	3.01664	3553	3542	3414	2664	2466	2602
SPBP8B7.20c	-0.470234	8.83727	-9.96416	1.76373e-05	0.000244195	3.20249	13407	13377	12478	9970	9543	9133
SPCC1494.06c	-0.414164	7.05936	-9.95287	1.77737e-05	0.000245547	2.99674	3872	3683	3671	2972	2839	2705
SPBC23E6.04c	-0.502067	7.91886	-9.93861	1.79476e-05	0.000247411	3.02403	7212	6808	6973	5348	4881	4772
SPBC1711.16	-0.518653	7.15103	-9.93305	1.80159e-05	0.000247816	2.98074	4123	4045	4234	3053	2889	2809
SPAC630.10	-0.45541	5.67699	-9.9191	1.81886e-05	0.000249113	3.05939	1464	1497	1407	1138	1066	1016
SPBC1773.06c	1.10976	4.97252	9.92177	1.81554e-05	0.000249113	3.18158	540	541	477	990	1251	1174
SPAC13G7.08c	-0.464617	7.44237	-9.90463	1.83696e-05	0.000249251	2.96058	5115	5133	4661	3926	3550	3446
SPBC16G5.15c	0.4523	6.82245	9.9088	1.83172e-05	0.000249251	2.97049	2325	2393	2335	3256	3297	3198
SPBC1718.03	-0.549586	7.06368	-9.91013	1.83006e-05	0.000249251	2.96495	4200	4105	3527	2894	2714	2547
SPBC354.06	0.46296	7.31553	9.90264	1.83947e-05	0.000249251	2.95709	3471	3163	3263	4715	4623	4441
SPNCRNA.279	-1.48359	1.95286	-9.90694	1.83406e-05	0.000249251	3.59568	182	155	136	50	62	58
SPCC24B10.07	0.520859	7.26546	9.88848	1.85741e-05	0.000251146	2.94705	3129	3038	3198	4589	4637	4353
SPBC9B6.10	0.424037	6.5798	9.88355	1.86371e-05	0.000251463	2.96157	2068	2098	1861	2845	2707	2614
SPAC1F7.02c	-0.511362	8.31131	-9.87905	1.86948e-05	0.000251707	3.04068	9066	9204	9365	6718	6523	6371
SPCC126.03	-0.473186	6.91179	-9.87421	1.87571e-05	0.000252011	2.94097	3477	3460	3404	2624	2394	2514
SPAC4F10.06	-0.426626	7.14898	-9.86737	1.88455e-05	0.000252665	2.92986	4206	4033	3767	3207	2968	2852
SPCC18B5.04	-0.375655	6.77208	-9.81657	1.95166e-05	0.000261112	2.9015	3091	3102	2886	2458	2355	2258
SPAC31A2.07c	-0.429914	6.70332	-9.8089	1.96203e-05	0.000261275	2.89858	2964	3030	2826	2352	2179	2089
SPAC3A11.12c	-0.385384	7.12372	-9.80353	1.96933e-05	0.000261275	2.88117	3960	3936	3726	3028	2967	2993
SPBC902.05c	0.528449	7.82316	9.80483	1.96756e-05	0.000261275	2.91202	4675	4814	4277	6470	6741	6823
SPCC320.11c	-0.476427	7.00462	-9.81249	1.95718e-05	0.000261275	2.89116	3847	3798	3411	2863	2559	2606
SPBC8E4.12c	1.95081	2.3468	9.79402	1.98233e-05	0.000262452	3.50039	62	47	84	271	248	217
SPAC1B3.20	0.788875	4.11493	9.7835	1.99682e-05	0.00026332	3.21792	346	344	274	563	551	564
SPBPB21E7.01c	1.77197	5.0254	9.78025	2.00131e-05	0.00026332	3.09408	414	449	422	1606	1795	1116
SPNCRNA.863	0.674233	7.7387	9.78041	2.00109e-05	0.00026332	2.89029	4273	4362	3716	7448	6424	6083
SPCC1827.01c	-0.488779	7.10818	-9.77526	2.00824e-05	0.000263686	2.86039	4002	3908	4004	3049	2790	2748
SPAC23H4.10c	-0.568217	8.43176	-9.76231	2.02636e-05	0.000263884	2.97456	10827	10803	9129	7378	6807	6714
SPAC26F1.12c	-0.498709	7.01833	-9.76513	2.0224e-05	0.000263884	2.85452	3903	3899	3449	2870	2702	2475
SPAC31G5.07	1.16709	2.65539	9.77059	2.01476e-05	0.000263884	3.43771	93	97	117	233	234	226
SPBC365.04c	-0.705531	6.75444	-9.76468	2.02304e-05	0.000263884	2.86438	3375	3307	3370	2317	2112	1826
SPAC19E9.02	0.395866	7.11626	9.75708	2.03373e-05	0.000264302	2.8458	3104	3000	2725	4033	3896	3797
SPNCRNA.1424	1.07139	4.57158	9.75104	2.04228e-05	0.000264871	3.12005	340	446	417	863	809	865
SPCC16A11.08	1.04537	5.13149	9.74788	2.04676e-05	0.000264912	3.02206	515	603	672	1228	1260	1216
SPBC29A10.10c	-0.423326	7.30556	-9.74365	2.05279e-05	0.000265152	2.83394	4534	4396	4424	3525	3346	3199
SPAC17A2.11	1.10701	2.87335	9.73119	2.07065e-05	0.000265516	3.38082	115	130	118	246	293	254
SPAC23C11.15	0.434487	7.22232	9.73752	2.06155e-05	0.000265516	2.82962	3131	3119	3113	4312	4384	4095
SPACUNK4.19	1.17176	2.16338	9.73003	2.07232e-05	0.000265516	3.45635	76	79	62	156	176	163
SPNCRNA.1410	1.03793	3.08047	9.73425	2.06625e-05	0.000265516	3.3531	133	164	134	324	279	290
SPBC1773.14	-0.650748	5.24715	-9.71961	2.08742e-05	0.000266913	2.97079	1164	1233	1077	813	757	668
SPAC2F7.13c	-0.401944	8.10554	-9.70401	2.11025e-05	0.000269189	2.8688	7976	7600	7508	6063	5854	5739
SPBC8D2.10c	-0.400013	7.89801	-9.70166	2.1137e-05	0.000269189	2.83705	6863	6559	6553	5225	5101	4974
SPAC2G11.14	0.676572	7.58078	9.69512	2.12337e-05	0.000269583	2.81287	3577	3551	3922	6012	6043	5775
SPCC965.14c	-1.36893	3.06957	-9.69384	2.12527e-05	0.000269583	3.33211	367	356	268	135	142	109
SPAC24C9.08	0.743827	8.14609	9.66539	2.16796e-05	0.000273719	2.85689	5900	5582	4575	9003	9258	8738
SPBC1711.04	-0.509999	7.21827	-9.65309	2.18672e-05	0.000273719	2.76487	4556	4517	3911	3056	3025	3110
SPBC2G2.08	-0.446108	7.89702	-9.65973	2.17656e-05	0.000273719	2.80546	6782	6734	6760	5163	4911	4975
SPBP35G2.03c	-0.73106	3.97991	-9.65223	2.18803e-05	0.000273719	3.14014	515	479	488	319	316	268
SPCC1442.07c	0.465028	4.97628	9.65647	2.18155e-05	0.000273719	2.96409	674	658	621	951	915	859
SPNCRNA.1672	0.604048	4.74883	9.6616	2.17372e-05	0.000273719	3.00974	549	559	483	802	856	785
SPNCRNA.61	2.4237	-1.34043	9.65849	2.17845e-05	0.000273719	2.78603	4	4	3	21	23	22
SPAP27G11.03	-0.415471	5.64852	-9.63392	2.21631e-05	0.000276713	2.84315	1416	1443	1364	1104	1051	1044
SPBC16H5.15	-0.582676	4.03525	-9.62753	2.22628e-05	0.000277412	3.10933	488	501	473	347	324	315
SPAC3H1.06c	-0.616732	7.46969	-9.61422	2.24721e-05	0.000279472	2.74159	5513	5701	4828	3406	3480	3661
SPAC22F3.08c	-0.643828	6.06219	-9.59631	2.27571e-05	0.000282463	2.77492	2211	2063	1832	1448	1303	1197
SPNCRNA.716	1.08277	6.51018	9.5935	2.28022e-05	0.000282471	2.74906	1314	1559	1722	3333	3132	3304
SPAC6G9.02c	-0.598881	8.05709	-9.58772	2.28952e-05	0.000283072	2.77641	8055	7520	8326	5425	5267	5259
SPAPB1E7.04c	0.76936	8.55438	9.58229	2.2983e-05	0.000283606	2.86244	7611	7525	5993	12521	11836	11787
SPNCRNA.1286	-0.662381	4.6258	-9.56085	2.33335e-05	0.000287373	2.95414	791	792	685	513	501	434
SPNCRNA.750	0.692914	4.79979	9.55252	2.34714e-05	0.000288512	2.91782	526	512	560	937	845	827
SPAC1006.02	-0.556986	5.79236	-9.54766	2.35522e-05	0.000288947	2.76168	1614	1685	1602	1217	1054	1099
SPCC1906.04	1.65053	1.72134	9.54254	2.36376e-05	0.000289436	3.35137	52	45	38	125	161	146
SPBC1683.01	1.35866	8.75433	9.53331	2.37926e-05	0.000290215	2.8707	6120	6018	7608	17290	18859	15073
SPBPB2B2.02	0.869049	3.23309	9.53529	2.37594e-05	0.000290215	3.17802	185	169	153	311	338	288
SPBC776.17	-0.47562	5.62524	-9.51104	2.41714e-05	0.00029427	2.75092	1484	1480	1286	1044	1033	1006
SPBC776.05	0.487823	5.34898	9.5021	2.43253e-05	0.000295578	2.78328	896	847	769	1251	1183	1124
SPAC4A8.02c	0.383254	5.71239	9.49434	2.44599e-05	0.000295685	2.72629	1153	1124	1070	1505	1487	1419
SPBC29A3.01	-0.739351	6.15375	-9.49367	2.44715e-05	0.000295685	2.68817	2367	2469	1909	1378	1396	1287
SPCC188.12	0.565345	4.52822	9.49354	2.44737e-05	0.000295685	2.91813	476	454	452	699	723	646
SPCC4E9.01c	0.757932	4.32522	9.48852	2.45613e-05	0.00029618	2.95423	345	388	392	665	626	627
SPAC1805.02c	-0.566546	7.25471	-9.48246	2.46674e-05	0.000296896	2.63184	4756	4846	3996	3182	2992	3071
SPAC977.12	-1.25795	5.40562	-9.47812	2.47437e-05	0.000297252	2.77898	1765	1796	1271	707	599	720
SPCC364.02c	0.586315	5.8769	9.46906	2.49039e-05	0.000298612	2.69179	1215	1151	1130	1684	1785	1838
SPNCRNA.248	0.962366	1.95435	9.45921	2.50794e-05	0.000300149	3.27452	70	65	66	133	133	131
SPBC16D10.01c	-0.556667	7.48082	-9.45155	2.52168e-05	0.000301228	2.612	5148	5189	5456	3837	3584	3441
SPAC1093.05	-0.526388	6.75297	-9.44385	2.53557e-05	0.000302002	2.61195	3183	3054	3201	2375	2168	2085
SPBC1685.17	0.597472	4.99288	9.4427	2.53767e-05	0.000302002	2.7965	670	618	599	935	955	996
SPBC25B2.05	-0.603063	7.35824	-9.42542	2.56921e-05	0.000305184	2.58886	5146	5192	4442	3612	3087	3130
SPAC17A2.05	0.571971	7.34995	9.41876	2.58148e-05	0.000305499	2.58327	3260	3110	3390	4959	4818	4873
SPNCRNA.643	-0.477671	5.12289	-9.419	2.58104e-05	0.000305499	2.75324	1062	1022	917	749	721	705
SPBC11B10.07c	0.379179	7.44112	9.41433	2.58969e-05	0.000305901	2.57736	3715	3776	3618	4997	4800	4803
SPAC22H12.01c	1.13584	5.96806	9.40708	2.60317e-05	0.000306923	2.64685	1130	1195	796	2226	2257	2362
SPCP1E11.11	-0.446065	8.65412	-9.40317	2.61048e-05	0.000307214	2.7356	11711	11717	10868	8943	8280	8221
SPAC3A11.06	0.790057	5.7616	9.39858	2.61908e-05	0.000307657	2.65346	1117	1081	831	1763	1776	1720
SPBP8B7.23	0.445127	7.01057	9.37938	2.65542e-05	0.000311351	2.5517	2715	2679	2661	3629	3815	3640
SPAC16.03c	-0.450661	6.43666	-9.3672	2.67878e-05	0.000313511	2.56581	2492	2409	2481	1880	1786	1792
SPNCRNA.703	-0.780127	3.32681	-9.36191	2.689e-05	0.000314129	3.02831	346	316	297	197	198	169
SPCC126.06	0.48495	7.17493	9.34557	2.72083e-05	0.000317264	2.52197	3158	3100	2669	4356	4084	4157
SPAC15E1.10	0.580854	4.76964	9.34103	2.72973e-05	0.000317719	2.75504	526	582	519	857	833	768
SPCC1827.05c	-0.532805	7.62262	-9.31708	2.77733e-05	0.000322668	2.51107	5845	6194	5280	4333	4023	3733
SPCC162.06c	0.53401	5.44679	9.29813	2.81566e-05	0.000326524	2.60802	910	855	877	1254	1341	1271
SPAC664.01c	-0.397648	7.19888	-9.28455	2.8435e-05	0.000329152	2.47135	4147	4054	4091	3230	3121	3079
SPCC306.08c	0.645962	8.3145	9.25831	2.89816e-05	0.00033487	2.55982	6336	6734	5551	9408	10197	9730
SPCC1494.05c	-0.372397	7.19089	-9.25482	2.90552e-05	0.000335111	2.4472	4228	3996	3900	3199	3230	3033
SPBC9B6.07	-0.477416	6.46102	-9.2372	2.94301e-05	0.000338819	2.46016	2698	2570	2323	1979	1789	1739
SPCC830.11c	-0.585886	5.49662	-9.23467	2.94844e-05	0.000338831	2.55051	1394	1262	1380	940	909	865
SPAC222.06	-0.403937	7.5542	-9.21971	2.98075e-05	0.000341228	2.42511	5454	5426	4899	4267	3919	3860
SPAC56E4.05	-0.41222	6.75288	-9.22049	2.97905e-05	0.000341228	2.43218	3060	2994	3015	2404	2246	2239
SPBC1709.05	-0.798248	12.0098	-9.21722	2.98617e-05	0.000341228	3.01567	135799	139606	121832	77508	75375	77446
SPBC1709.06	-0.522884	5.98948	-9.2151	2.99078e-05	0.000341228	2.47643	1951	1940	1673	1404	1258	1247
SPCC1322.10	0.752224	10.5534	9.20593	3.01087e-05	0.000342905	2.8634	27327	29122	27990	45875	48389	49472
SPAC29A4.17c	0.981604	4.39449	9.19045	3.04511e-05	0.000344062	2.71176	393	420	289	725	742	712
SPAC56F8.12	1.10046	6.44413	9.1893	3.04769e-05	0.000344062	2.43109	1233	1477	1658	3195	3013	3180
SPBC2G5.07c	-0.395947	6.49596	-9.19757	3.02931e-05	0.000344062	2.4254	2632	2451	2467	1989	1920	1887
SPCC1620.09c	0.631924	7.24772	9.19107	3.04373e-05	0.000344062	2.39978	2842	2923	3143	4631	4663	4639
SPCC330.06c	1.06355	9.00737	9.18911	3.0481e-05	0.000344062	2.63398	9634	9549	7065	17480	18449	18822
SPAC10F6.03c	-0.499814	9.04555	-9.17745	3.07422e-05	0.000344562	2.62782	16248	15585	14074	10955	10925	10841
SPAC17D4.04	-0.540802	7.15725	-9.18278	3.06225e-05	0.000344562	2.39107	4227	4100	4224	3159	2924	2655
SPAC19A8.07c	-0.640458	7.18908	-9.17871	3.07139e-05	0.000344562	2.38914	4639	4854	3854	3048	2891	2680
SPCC550.08	-0.467074	5.98761	-9.17875	3.07129e-05	0.000344562	2.44648	1801	1818	1819	1357	1372	1248
SPAC15E1.04	0.389842	7.40889	9.16571	3.10077e-05	0.000346521	2.37633	3674	3631	3519	4725	4884	4720
SPAC343.04c	0.486126	6.57935	9.1649	3.1026e-05	0.000346521	2.39565	1974	1911	2006	2911	2809	2622
SPNCRNA.388	0.730261	5.9137	9.15986	3.11409e-05	0.000347194	2.44265	1061	1120	1239	1967	1893	1856
SPAC31G5.15	0.43628	5.25099	9.13689	3.16704e-05	0.000352479	2.5058	816	780	790	1121	1089	1052
SPBC21H7.06c	1.51939	5.61701	9.12707	3.19e-05	0.000354413	2.48112	798	888	489	2082	1964	2089
SPBC16C6.06	0.434154	7.14034	9.11937	3.20813e-05	0.000355806	2.33858	2926	2974	2947	4236	4072	3783
SPNCRNA.888	0.561668	6.07525	9.1014	3.25087e-05	0.000359918	2.37725	1463	1419	1179	2034	2040	1962
SPNCRNA.1327	1.18961	2.89696	9.09383	3.26907e-05	0.000361303	2.89619	127	136	98	260	309	262
SPAC8C9.03	0.852668	2.62478	9.08058	3.30122e-05	0.000363673	2.91727	120	115	99	203	214	193
SPBC26H8.07c	-0.478949	9.08639	-9.0782	3.30703e-05	0.000363673	2.55452	16372	15910	14567	11352	11634	10936
SPNCRNA.862	0.615828	7.79642	9.07793	3.30768e-05	0.000363673	2.33519	4516	4619	3979	7616	6511	6227
SPBC543.02c	-0.476626	8.08535	-9.073	3.31975e-05	0.00036437	2.36476	7748	7699	7901	5743	5551	5673
SPAC1635.01	0.768595	9.37012	9.06437	3.34101e-05	0.000365441	2.59071	13222	13327	10640	20737	21287	21550
SPNCRNA.477	1.26268	2.30917	9.06608	3.3368e-05	0.000365441	2.9529	89	73	71	215	193	160
SPAC25H1.08c	0.504868	8.11021	9.06057	3.35042e-05	0.000365841	2.36019	6019	5823	5116	8002	8025	8209
SPAC8F11.07c	-0.504314	5.32409	-9.05763	3.35774e-05	0.000366011	2.43012	1233	1194	1057	883	823	774
SPBC4F6.14	-0.548757	8.38066	-9.05238	3.37082e-05	0.000366807	2.40109	9454	10110	9814	7291	6733	6322
SPAC25A8.03c	-0.594745	5.42691	-9.04612	3.38647e-05	0.000367881	2.40721	1387	1337	1140	849	852	878
SPCC16A11.15c	0.53817	4.90973	9.0418	3.39734e-05	0.000368432	2.4882	639	579	601	922	916	831
SPCC1884.01	-0.924962	4.59478	-9.03841	3.40589e-05	0.000368729	2.54984	845	749	837	494	380	423
SPBC14F5.10c	0.442464	6.16714	9.03457	3.4156e-05	0.000369152	2.31379	1579	1565	1358	2080	2053	2038
SPBC428.03c	-0.395487	7.43302	-9.02977	3.42781e-05	0.000369843	2.26502	5111	4919	4443	3712	3755	3631
SPBC17A3.09c	-0.400113	6.11993	-9.01715	3.46007e-05	0.000372691	2.30248	2030	1899	1897	1561	1468	1432
SPAC23H4.09	-0.603758	8.03351	-9.01121	3.47539e-05	0.000373244	2.30981	8420	8393	6853	5573	5020	5071
SPCC417.16	0.71768	7.57083	9.01061	3.47696e-05	0.000373244	2.26552	3474	3460	3889	6413	5739	5829
SPBC20F10.07	0.368475	6.92728	9.00796	3.4838e-05	0.000373349	2.25178	2607	2631	2570	3520	3380	3289
SPBC725.15	-0.438822	7.66547	-9.00322	3.49613e-05	0.000374039	2.2554	6127	5915	5230	4533	4218	4102
SPAC1F3.10c	0.360847	7.47406	9.00009	3.50427e-05	0.000374139	2.24162	3868	3807	3762	5054	4926	4862
SPNCRNA.1491	-0.484596	7.20787	-8.99834	3.50885e-05	0.000374139	2.23854	4221	4156	4372	3212	3037	2962
SPAC13C5.06c	0.443549	5.33076	8.99252	3.52408e-05	0.000375134	2.37496	879	816	821	1200	1125	1132
SPAC19G12.06c	-0.592498	9.33229	-8.98806	3.53582e-05	0.000375755	2.5219	20765	20138	17035	13478	12874	12329
SPAC23D3.07	0.434397	7.59905	8.97956	3.5583e-05	0.000376601	2.23199	4314	4138	3729	5461	5618	5522
SPAC977.11	-1.12367	1.99434	-8.97833	3.56156e-05	0.000376601	2.91425	143	136	149	67	73	58
SPBC887.13c	-0.402756	5.83786	-8.97872	3.56053e-05	0.000376601	2.29601	1678	1647	1475	1256	1239	1170
SPBC27B12.13	-0.397381	8.4423	-8.96262	3.60356e-05	0.000380409	2.33672	9989	9983	9154	7789	7325	7223
SPBC1683.03c	-0.653264	7.60634	-8.94763	3.64418e-05	0.000384059	2.21199	6467	6416	5053	3919	3857	3668
SPBC1683.09c	-1.28899	4.11164	-8.92029	3.7196e-05	0.000391251	2.55248	596	718	663	290	321	213
SPCP1E11.05c	0.506173	6.49457	8.91845	3.72473e-05	0.000391251	2.197	2001	1729	1795	2775	2607	2538
SPCC364.01	-1.10488	4.98834	-8.91457	3.7356e-05	0.000391744	2.3826	1117	1024	1269	582	563	455
SPCC16C4.22	-0.657919	4.1426	-8.9116	3.74391e-05	0.00039197	2.5239	584	512	523	364	356	316
SPAC12G12.13c	-0.4395	7.28127	-8.90249	3.76964e-05	0.000394014	2.15798	4581	4410	4221	3580	3213	3066
SPAC13F5.06c	0.414448	6.5256	8.8987	3.7804e-05	0.00039449	2.17798	1927	1939	1951	2718	2616	2503
SPNCRNA.908	-0.34763	7.1701	-8.86717	3.87119e-05	0.000403302	2.12817	4044	4008	3794	3169	3103	3132
SPAC13G7.10	0.522803	6.08781	8.85246	3.9144e-05	0.000406862	2.16939	1372	1493	1278	1956	2075	1976
SPNCRNA.1445	-0.507532	5.64353	-8.85118	3.91817e-05	0.000406862	2.21365	1537	1485	1329	1015	1097	979
SPBC543.06c	-0.452353	6.90243	-8.84897	3.92471e-05	0.000406877	2.12011	3642	3489	3092	2545	2453	2536
SPCC1442.10c	-0.364665	7.9427	-8.84446	3.93811e-05	0.000407596	2.15061	7072	6830	6464	5448	5218	5306
SPCC188.02	0.347274	7.74877	8.84232	3.94448e-05	0.000407596	2.12657	4720	4802	4389	6109	5919	5844
SPBC1685.08	0.47347	5.98994	8.83866	3.95541e-05	0.000407913	2.16573	1273	1389	1272	1834	1844	1837
SPBC29A3.06	-0.386654	7.12029	-8.837	3.96038e-05	0.000407913	2.10409	4078	3781	3745	3144	2919	2905
SPBC713.02c	0.462984	8.24876	8.82918	3.98388e-05	0.000409008	2.19047	6213	6297	6372	8910	8766	8638
SPBPB2B2.18	4.07666	-1.0374	8.82928	3.98358e-05	0.000409008	2.3292	1	2	6	53	52	41
SPAC24B11.11c	0.380746	6.79492	8.81471	4.02777e-05	0.000412378	2.09503	2401	2435	2260	3075	3164	3094
SPCC1235.18	-0.871275	3.61818	-8.81408	4.02969e-05	0.000412378	2.54366	380	398	434	219	230	218
SPBPB21E7.02c	2.49741	-0.273861	8.80623	4.05376e-05	0.000414174	2.64412	9	8	7	49	60	37
SPNCRNA.721	-0.951341	2.72987	-8.78919	4.10651e-05	0.00041889	2.67272	230	217	225	134	118	100
SPAC222.15	0.997322	1.67781	8.78059	4.13344e-05	0.000420961	2.78617	59	56	49	118	108	106
SPBC4B4.08	-0.535761	7.1619	-8.77266	4.15844e-05	0.00042245	2.05051	4459	4319	3818	2897	3158	2721
SPNCRNA.883	0.605243	4.52045	8.77174	4.16135e-05	0.00042245	2.33712	449	461	445	664	710	711
SPBC27.01c	-0.507367	5.64426	-8.76395	4.1861e-05	0.000424285	2.14017	1539	1484	1330	1016	1100	977
SPBC17A3.01c	-0.468799	7.60739	-8.75782	4.20568e-05	0.000425591	2.04667	5600	5396	5727	4259	4037	3924
SPAC222.12c	-0.736291	10.4287	-8.75505	4.21458e-05	0.000425813	2.48332	46111	46204	37992	26251	25330	27061
SPAC2F3.03c	-0.326008	7.02992	-8.7457	4.24474e-05	0.000428179	2.02877	3713	3567	3392	2967	2857	2776
SPAC6G9.10c	-0.34357	7.0192	-8.74313	4.25307e-05	0.00042834	2.02694	3691	3515	3449	2947	2826	2713
SPBC1711.10c	0.346381	7.16416	8.7192	4.33153e-05	0.000435552	2.00344	3163	3076	3034	4017	3978	3917
SPAC25H1.09	0.430709	5.23671	8.71409	4.3485e-05	0.000436567	2.15718	813	812	743	1089	1119	1018
SPNCRNA.438	-0.492564	5.13448	-8.71036	4.36093e-05	0.000437125	2.1717	1019	1087	935	750	712	719
SPBC1198.13c	0.479616	6.39851	8.70157	4.39036e-05	0.000438691	2.01933	1727	1693	1789	2496	2505	2338
SPCC1529.01	-0.540689	5.30708	-8.70255	4.38707e-05	0.000438691	2.13746	1189	1167	1126	890	810	724
SPAC13G6.03	0.377489	6.84079	8.68276	4.45414e-05	0.000444365	1.9813	2583	2400	2353	3309	3287	3034
SPAC18G6.07c	-0.343322	7.72531	-8.67882	4.46766e-05	0.000444663	1.98531	5866	5989	5529	4812	4610	4425
SPAC513.02	1.35785	3.70138	8.67781	4.47112e-05	0.000444663	2.43032	238	229	139	501	522	514
SPAC11E3.14	0.522396	6.87878	8.67511	4.48041e-05	0.000444891	1.97407	2431	2286	2444	3584	3618	3201
SPAC17A5.07c	0.323485	7.45241	8.66998	4.49809e-05	0.00044595	1.96222	3901	3812	3702	4967	4799	4670
SPBC1778.01c	-0.554494	9.24548	-8.66691	4.5087e-05	0.000446305	2.24044	17929	18539	17183	12793	11582	12550
SPAC29A4.13	-0.3782	5.70813	-8.65908	4.53593e-05	0.000447606	2.04115	1472	1441	1431	1149	1137	1091
SPAC2E1P3.01	0.549973	5.3708	8.65932	4.53511e-05	0.000447606	2.09169	797	834	863	1231	1237	1217
SPBC1703.03c	-0.439972	7.09155	-8.64626	4.58092e-05	0.000450999	1.94304	4011	3970	3611	3140	2822	2681
SPBC409.15	-0.463368	6.85283	-8.64324	4.5916e-05	0.000450999	1.9473	3372	3397	3131	2635	2433	2201
SPNCRNA.1436	0.823594	3.35969	8.64411	4.58851e-05	0.000450999	2.44856	214	194	157	347	336	323
SPAC11E3.09	-0.41762	6.13038	-8.63962	4.60443e-05	0.000451561	1.9843	2042	2062	1807	1579	1464	1425
SPCC576.06c	0.444067	5.63331	8.63346	4.62633e-05	0.00045301	2.03011	1081	1062	961	1392	1439	1434
SPBC14F5.03c	-0.398225	8.22497	-8.621	4.67105e-05	0.000455983	2.00747	8554	8201	8279	6686	6440	6092
SPCC569.04	0.771619	3.19376	8.62167	4.66863e-05	0.000455983	2.45745	182	160	168	314	302	265
SPCC320.08	-0.390737	7.77137	-8.6187	4.67935e-05	0.000456093	1.93908	6262	6292	5702	4646	4870	4543
SPAC1486.09	-0.453579	7.61335	-8.61149	4.70549e-05	0.00045654	1.92171	5455	5768	5483	4414	3949	3980
SPAC22H10.03c	0.402323	7.37678	8.61425	4.69547e-05	0.00045654	1.9142	3534	3452	3553	4792	4692	4591
SPBC1734.14c	-0.357609	6.38162	-8.61318	4.69932e-05	0.00045654	1.94353	2380	2356	2150	1883	1834	1712
SPBC18H10.05	0.951582	5.33347	8.60675	4.72275e-05	0.000457516	2.0639	671	633	825	1466	1343	1319
SPAC31A2.04c	0.373576	7.49672	8.57714	4.83228e-05	0.000467415	1.88522	4106	3918	3562	5095	5142	4908
SPAC630.09c	0.414309	6.23063	8.5723	4.85045e-05	0.000467524	1.91905	1623	1676	1450	2134	2162	2090
SPBC1861.01c	0.499843	9.01705	8.57157	4.85321e-05	0.000467524	2.11957	10452	11213	10119	15518	15643	14267
SPBC19G7.18c	0.567912	5.30677	8.57097	4.85548e-05	0.000467524	2.02637	850	823	702	1178	1153	1221
SPBC6B1.09c	0.365939	5.95758	8.5631	4.88523e-05	0.000469677	1.93305	1337	1342	1311	1777	1757	1663
SPNCRNA.1104	-0.487327	6.80816	-8.56069	4.89437e-05	0.000469845	1.87804	3378	3443	2880	2472	2274	2232
SPNCRNA.1061	0.459897	4.67487	8.55819	4.90387e-05	0.000470047	2.12528	563	521	504	771	737	699
SPNCRNA.1562	-0.524956	5.40131	-8.54352	4.96014e-05	0.000474724	1.98659	1254	1326	1122	893	827	876
SPBPB21E7.11	2.29487	1.37355	8.53603	4.98915e-05	0.000476782	2.6224	26	38	22	150	171	108
SPBP4G3.02	2.84719	11.031	8.53114	5.00818e-05	0.000477883	2.39571	15475	15405	28360	132248	144410	138092
SPNCRNA.1298	1.86088	2.41438	8.50899	5.09544e-05	0.00048548	2.51439	92	49	68	274	212	266
SPAC2F3.08	0.503475	6.52397	8.50401	5.11528e-05	0.0004861	1.84261	1793	1942	1902	2665	2755	2650
SPBC4C3.05c	-0.384502	8.46342	-8.50352	5.11725e-05	0.0004861	1.95213	10029	10082	9304	7966	7614	7198
SPBC83.19c	4.02422	-2.53476	8.48444	5.19413e-05	0.000492667	1.57688	1	0	1	15	16	19
SPBC211.07c	0.500868	5.88377	8.47897	5.21644e-05	0.000494046	1.86897	1285	1283	1062	1789	1733	1655
SPAC1834.13	1.07976	1.94396	8.46626	5.26865e-05	0.000498248	2.51553	62	76	55	141	133	137
SPBC29A3.10c	0.673742	7.28177	8.45721	5.30615e-05	0.000501049	1.78289	3347	3180	2519	4867	4864	4748
SPAC683.02c	-0.590994	6.33677	-8.4542	5.31873e-05	0.000501492	1.81076	2557	2604	2102	1748	1579	1531
SPBC13E7.10c	0.512725	5.56177	8.44646	5.35116e-05	0.000501495	1.87969	1024	990	873	1367	1478	1316
SPBC20F10.01	-0.491828	8.36541	-8.44788	5.34516e-05	0.000501495	1.88597	9796	10249	8558	7091	6620	6774
SPBC26H8.08c	-0.419606	8.45087	-8.44561	5.3547e-05	0.000501495	1.8998	9874	9830	9792	7418	7476	7396
SPCC1393.06c	-0.410735	6.80443	-8.44478	5.35822e-05	0.000501495	1.77711	3291	3086	3023	2533	2423	2196
SPCC1672.05c	-0.606367	8.12081	-8.44509	5.35692e-05	0.000501495	1.84316	9033	9042	7134	5733	5437	5439
SPBC31E1.02c	-0.422737	6.69574	-8.43414	5.4032e-05	0.000504961	1.77234	3161	2920	2686	2299	2238	2064
SPBC359.05	-0.651237	6.43913	-8.43076	5.4176e-05	0.000505563	1.78472	2862	2761	2334	1922	1631	1566
SPBC23G7.06c	0.582746	7.21473	8.42189	5.45556e-05	0.000505885	1.74943	2826	2941	3087	4453	4349	4589
SPBC839.03c	-0.533015	5.8246	-8.42749	5.43155e-05	0.000505885	1.83025	1730	1786	1469	1210	1114	1148
SPBC947.01	0.545109	7.33507	8.42537	5.44063e-05	0.000505885	1.75278	3214	3184	3349	4597	4974	4800
SPCC162.11c	-0.382594	6.43883	-8.42133	5.45795e-05	0.000505885	1.77385	2556	2336	2334	1925	1835	1837
SPCC290.04	-0.520415	5.79136	-8.42066	5.46085e-05	0.000505885	1.82782	1609	1568	1659	1191	1082	1134
SPAC2C4.10c	0.388361	5.5581	8.41595	5.48113e-05	0.000507025	1.85076	1045	1030	929	1361	1295	1315
SPAC24C9.14	0.449203	5.86681	8.40481	5.52949e-05	0.000510755	1.80522	1200	1215	1225	1653	1697	1671
SPCC330.12c	0.476255	8.42886	8.39915	5.55421e-05	0.000512293	1.85617	7313	7171	6829	9518	10516	9924
SPBC13A2.04c	-0.773553	6.76381	-8.39668	5.56505e-05	0.000512549	1.73927	3779	3239	3363	2288	2141	1733
SPBC16A3.10	0.325289	6.34176	8.38072	5.6357e-05	0.000518305	1.74395	1810	1783	1690	2270	2211	2206
SPCC757.07c	1.49904	7.45698	8.36949	5.68596e-05	0.000522171	1.75011	2939	3104	1793	6995	7683	7104
SPNCRNA.605	-0.757073	5.16537	-8.3576	5.73979e-05	0.000526354	1.86781	1137	1301	983	725	666	644
SPAC5D6.02c	-0.396882	4.82298	-8.35108	5.76952e-05	0.000528318	1.91728	808	795	764	624	602	590
SPAC4H3.03c	0.631458	5.24587	8.34588	5.79334e-05	0.000529737	1.84194	715	734	774	1111	1176	1191
SPBC26H8.02c	0.349051	7.65178	8.33871	5.82642e-05	0.000531995	1.68488	4326	4498	4171	5622	5604	5492
SPCC1020.08	-0.478009	7.74046	-8.33268	5.8544e-05	0.000533783	1.68935	6569	6478	5425	4656	4459	4237
SPAC4G9.11c	0.658834	6.24061	8.32984	5.8676e-05	0.00053422	1.70931	1561	1608	1243	2281	2423	2299
SPAC1250.02	-0.75361	3.29197	-8.3169	5.92832e-05	0.000538977	2.18168	326	295	306	209	175	172
SPBC1271.10c	-0.323404	6.86923	-8.31141	5.95427e-05	0.000540562	1.6571	3277	3240	3021	2632	2627	2443
SPAC186.07c	2.19071	0.319909	8.29803	6.0181e-05	0.000543253	2.40161	12	12	18	75	71	51
SPAC637.12c	-0.317085	6.80914	-8.30272	5.99563e-05	0.000543253	1.65155	3129	3115	2885	2533	2435	2433
SPBC409.07c	-0.445735	6.6556	-8.29984	6.00939e-05	0.000543253	1.65609	2996	2717	2870	2146	2187	2032
SPNCRNA.421	0.969786	3.16635	8.29817	6.01742e-05	0.000543253	2.19342	177	170	124	311	298	317
SPAC6F12.06	0.416535	6.54345	8.26844	6.16196e-05	0.000554243	1.63373	2041	1886	1961	2780	2670	2494
SPAPB24D3.03	-0.738993	5.26806	-8.26891	6.15964e-05	0.000554243	1.77252	1277	1357	1019	761	738	699
SPBC17D11.08	0.803728	6.39397	8.26762	6.16601e-05	0.000554243	1.64612	1698	1728	1258	2703	2867	2623
SPAC4F8.08	1.16879	1.32082	8.25602	6.22349e-05	0.000555481	2.39635	40	39	41	85	100	90
SPAPB2B4.06	0.64051	5.15001	8.25629	6.22212e-05	0.000555481	1.77915	708	762	609	1063	1071	1134
SPAPJ760.02c	0.524242	7.56822	8.26032	6.20211e-05	0.000555481	1.61493	3812	3758	3970	5406	5822	5542
SPBC36.07	-0.360464	6.91102	-8.25709	6.21813e-05	0.000555481	1.60757	3366	3346	3229	2695	2698	2438
SPNCRNA.1353	0.43832	5.01326	8.26007	6.20334e-05	0.000555481	1.80311	662	685	675	956	923	889
SPNCRNA.234	4.76076	-2.45008	8.24707	6.26823e-05	0.00055869	1.4228	0	0	2	23	26	20
SPNCRNA.704	-0.395201	6.74366	-8.2405	6.30137e-05	0.000560857	1.59909	3247	2973	2757	2342	2333	2210
SPBC530.07c	-0.788159	5.90179	-8.23354	6.33662e-05	0.000563206	1.65584	2031	2170	1576	1135	1132	1085
SPBC83.01	0.474294	9.00038	8.23141	6.34748e-05	0.000563383	1.82024	10629	10811	10246	14387	15059	15023
SPBC651.09c	0.363709	7.53812	8.21105	6.45214e-05	0.000571781	1.56493	3943	4063	3939	5215	5273	5044
SPCC4G3.13c	0.58534	6.45543	8.20781	6.46899e-05	0.000571781	1.58616	1862	1882	1503	2619	2616	2685
SPNCRNA.1110	0.639511	4.66206	8.20779	6.46909e-05	0.000571781	1.82523	556	490	437	764	765	800
SPAC1F3.09	0.332808	7.0664	8.19537	6.53411e-05	0.000575926	1.54792	2918	2972	2817	3768	3638	3674
SPAC637.11	-0.347407	5.60363	-8.19539	6.53398e-05	0.000575926	1.64854	1369	1332	1297	1077	1077	1021
SPAC13D6.02c	-0.538291	8.94635	-8.19087	6.55784e-05	0.000577217	1.77428	14666	14206	14440	11041	9949	9262
SPBC21C3.11	0.454589	6.30015	8.18235	6.60303e-05	0.00058039	1.57158	1641	1777	1499	2260	2321	2215
SPAC23C4.07	-0.698634	4.76036	-8.17887	6.62156e-05	0.000581216	1.78142	950	854	725	546	498	524
SPAC869.06c	5.55461	-2.05035	8.17249	6.65576e-05	0.000583412	1.4426	0	0	2	30	48	45
SPSNORNA.19	1.90367	1.22795	8.17043	6.66684e-05	0.000583578	2.3373	38	22	29	132	114	90
SPAC823.04	-0.62628	6.56661	-8.16867	6.67631e-05	0.000583603	1.5451	2726	2970	2895	2115	1813	1712
SPAC9E9.12c	0.921179	8.12819	8.16127	6.7164e-05	0.000584695	1.60686	5628	5417	3961	9655	9515	9182
SPBC1778.07	-0.489991	6.33137	-8.16423	6.70035e-05	0.000584695	1.55329	2461	2479	2042	1734	1669	1604
SPBC887.08	-0.519176	4.70321	-8.16181	6.71344e-05	0.000584695	1.77398	810	778	688	542	514	547
SPCC70.02c	1.12794	7.4876	8.15529	6.74892e-05	0.000585921	1.5414	3335	3400	2264	6165	6477	6920
SPCC965.12	-0.470022	4.47877	-8.15692	6.74004e-05	0.000585921	1.8118	647	641	624	489	444	462
SPAC23C11.17	0.360709	7.76088	8.15092	6.77284e-05	0.000587195	1.52666	4821	4776	4371	5959	6094	6049
SPBC839.07	-0.403326	5.75631	-8.13707	6.8492e-05	0.000593006	1.57837	1489	1523	1519	1181	1151	1129
SPAC11H11.06	0.417654	8.35421	8.12984	6.88945e-05	0.000595104	1.60152	7352	7025	6309	9477	9579	8816
SPAC14C4.05c	0.45254	6.58766	8.12601	6.91088e-05	0.000595104	1.50423	1970	1958	2067	2817	2808	2663
SPBC25H2.04c	-0.435098	6.36267	-8.12744	6.90287e-05	0.000595104	1.51768	2488	2356	2143	1784	1828	1608
SPBPB8B6.06c	-0.862544	2.50937	-8.12626	6.90948e-05	0.000595104	2.1523	194	180	185	118	102	91
SPAC1556.04c	0.323779	6.06201	8.11994	6.94503e-05	0.000597235	1.53268	1473	1470	1410	1869	1833	1803
SPAC328.07c	0.342657	6.76833	8.10362	7.03771e-05	0.000604387	1.47506	2368	2344	2344	3089	3025	2929
SPCC1322.09	0.430188	6.91814	8.09833	7.06803e-05	0.000606172	1.46509	2459	2560	2577	3462	3491	3387
SPAC343.07	-0.495847	5.00842	-8.09201	7.10451e-05	0.000608479	1.65442	992	877	920	697	655	644
SPAC8F11.08c	0.359585	7.71947	8.08953	7.11884e-05	0.000608886	1.46756	4553	4697	4322	5889	5783	5912
SPBC21C3.10c	-0.767079	4.46366	-8.08094	7.16881e-05	0.000612336	1.75204	726	782	600	434	387	426
SPBC577.13	0.361134	5.96242	8.07611	7.19709e-05	0.000613103	1.50211	1339	1338	1333	1773	1755	1677
SPBC83.13	0.399656	8.39116	8.07705	7.19161e-05	0.000613103	1.56094	7191	7087	7030	9368	9581	9457
SPBC887.05c	0.319003	6.73562	8.07211	7.22065e-05	0.000614287	1.44774	2357	2319	2279	3003	2902	2863
SPAC21E11.04	-0.503782	4.96697	-8.06849	7.24196e-05	0.000615276	1.64083	963	952	806	671	629	635
SPAPB24D3.02c	-0.534956	5.52979	-8.06653	7.25356e-05	0.000615439	1.54659	1337	1315	1404	1016	926	887
SPAC343.01c	-0.373113	6.34595	-8.05767	7.30624e-05	0.000618396	1.45515	2368	2184	2200	1847	1753	1668
SPBC13E7.09	0.571104	6.67861	8.0574	7.30787e-05	0.000618396	1.43859	2129	2075	1926	2821	3251	3142
SPBC16H5.10c	-0.453092	7.76428	-8.05492	7.32266e-05	0.000618823	1.4419	6067	6069	6405	4702	4607	4389
SPNCRNA.648	0.63166	4.0301	8.04399	7.3884e-05	0.000623549	1.80098	323	353	283	527	508	464
SPAC13D6.03c	-0.397938	5.71871	-8.04051	7.40944e-05	0.000624018	1.49541	1536	1493	1381	1216	1087	1080
SPAC22F8.09	-0.438152	8.02655	-8.03821	7.42341e-05	0.000624018	1.46032	7418	7588	7120	5958	5554	5033
SPBC24C6.02	-0.495356	7.04748	-8.03894	7.419e-05	0.000624018	1.40779	3796	3660	4000	2856	2713	2641
SPBC839.16	-0.551853	8.22962	-8.03343	7.45255e-05	0.00062564	1.4933	8759	8997	8739	5708	6402	6172
SPAC5H10.02c	1.16336	4.12459	8.02673	7.49353e-05	0.000628251	1.78057	349	311	207	696	636	597
SPAC139.02c	-0.426005	6.60317	-8.01801	7.54727e-05	0.000630262	1.40501	2998	2744	2494	2098	2119	1964
SPBC16E9.19	-0.381285	5.10623	-8.01992	7.53548e-05	0.000630262	1.57014	974	995	898	771	739	713
SPBP8B7.32	0.597766	8.08469	8.0192	7.53996e-05	0.000630262	1.45841	5371	5763	4974	8830	8711	7178
SPAC1782.10c	-0.546229	8.30653	-8.01585	7.56066e-05	0.000630551	1.49143	10282	9426	8300	7017	6164	6147
SPBC1711.07	-0.461338	7.89533	-8.0137	7.57402e-05	0.000630837	1.4197	7103	7297	6042	5079	4894	4968
SPBC29A10.11c	0.375393	6.92253	7.99899	7.66604e-05	0.000637666	1.3744	2645	2521	2599	3564	3369	3250
SPAC3A12.09c	-0.516618	4.31724	-7.99427	7.69587e-05	0.000638816	1.69795	591	588	559	451	398	380
SPBC1921.06c	-0.467049	5.35801	-7.99362	7.69997e-05	0.000638816	1.50465	1293	1153	1077	894	843	833
SPBC2G5.01	-0.329616	8.01591	-7.99185	7.71118e-05	0.000638912	1.41384	7239	7174	6750	5732	5613	5662
SPAC1687.01	-0.403038	6.78266	-7.98668	7.74406e-05	0.000640801	1.36819	3344	3090	2816	2445	2289	2321
SPBC2G2.05	-0.345134	6.76136	-7.97465	7.82117e-05	0.000645501	1.35782	3153	3025	2748	2395	2352	2343
SPBC337.04	0.503746	5.96026	7.97508	7.81836e-05	0.000645501	1.41196	1387	1322	1116	1884	1763	1817
SPAC11D3.03c	-0.819404	4.20969	-7.97208	7.83771e-05	0.000646027	1.70451	652	651	500	373	345	310
SPAC12G12.02	-0.474522	6.76999	-7.96156	7.90603e-05	0.000650785	1.34595	3076	3116	3187	2439	2306	2087
SPAPB8E5.07c	-0.417014	8.33786	-7.96004	7.91593e-05	0.000650785	1.44353	8946	9050	9246	7107	6864	6672
SPAC17H9.17c	-0.44769	4.85365	-7.95016	7.98074e-05	0.000654761	1.55378	843	870	751	612	610	601
SPAC1B3.16c	-0.983649	8.63209	-7.94797	7.99519e-05	0.000654761	1.50087	11902	12830	16240	7021	7229	6581
SPBC21H7.04	-0.553036	6.56846	-7.94816	7.99395e-05	0.000654761	1.3439	2755	2665	2969	2033	1913	1829
SPAC1834.03c	-0.745987	9.05237	-7.91346	8.22682e-05	0.000672412	1.54443	19162	17842	13679	10465	10001	9719
SPAC186.05c	0.580043	6.80009	7.91117	8.24247e-05	0.000672412	1.29921	2123	2162	2367	3456	3469	3120
SPBC32H8.08c	-0.376076	6.26872	-7.9113	8.24153e-05	0.000672412	1.32646	2282	2101	2027	1756	1675	1559
SPBC1773.05c	0.464827	5.65512	7.90612	8.27704e-05	0.000674366	1.38212	1030	1050	1046	1408	1478	1474
SPNCRNA.1512	-0.495278	4.50144	-7.89965	8.32158e-05	0.000677127	1.57557	705	665	593	485	454	466
SPCC576.02	-0.344219	5.44844	-7.88797	8.40272e-05	0.000682855	1.3916	1215	1213	1158	959	970	925
SPBC1773.12	0.722983	3.279	7.88547	8.42024e-05	0.000683405	1.80417	179	192	179	343	299	278
SPAC1399.06	-0.501183	4.7819	-7.87786	8.4737e-05	0.000686867	1.50179	836	847	708	575	573	555
SPBPB10D8.04c	-1.54276	1.44763	-7.87047	8.52597e-05	0.000690224	2.07479	123	94	124	45	33	39
SPBC646.13	0.352173	8.53595	7.86211	8.58559e-05	0.000694165	1.39348	8147	8122	7689	10325	10404	10161
SPAP27G11.15	-0.361896	6.31359	-7.85488	8.63745e-05	0.000697098	1.27108	2312	2128	2137	1807	1728	1636
SPCC1494.04c	-0.403914	6.29633	-7.854	8.64379e-05	0.000697098	1.27174	2318	2304	1983	1709	1724	1602
SPBC800.06	-0.482464	7.9074	-7.84809	8.68652e-05	0.000699655	1.26965	7478	7287	6026	5145	5009	4805
SPAC18G6.04c	-0.397039	7.37516	-7.84561	8.70457e-05	0.000700222	1.2266	4991	4756	4179	3604	3640	3415
SPAC2F7.11	-0.650345	5.28709	-7.82535	8.85321e-05	0.000711279	1.36537	1378	1102	1104	791	773	732
SPAC222.13c	0.42398	6.68405	7.8107	8.96248e-05	0.000718462	1.21014	2134	2131	2207	3063	2973	2744
SPBC2D10.13	-0.490338	4.82196	-7.81033	8.96523e-05	0.000718462	1.43181	890	816	742	606	565	587
SPAC57A7.08	0.587856	8.15213	7.80401	9.01284e-05	0.000721368	1.27098	5394	5653	5877	8209	8724	8768
SPBP23A10.14c	0.778485	7.17932	7.79259	9.0996e-05	0.000727396	1.18374	2473	2608	3016	4521	4701	4760
SPAC10F6.10	-0.436694	6.27203	-7.78372	9.16768e-05	0.000729746	1.2083	2213	2209	2133	1782	1644	1479
SPCC777.06c	0.303906	6.25378	7.78723	9.14066e-05	0.000729746	1.2122	1738	1670	1600	2120	2077	2048
SPCC794.02	-0.758788	3.46805	-7.78569	9.15252e-05	0.000729746	1.67815	330	352	368	215	222	189
SPCP31B10.06	0.409624	6.40013	7.78278	9.17494e-05	0.000729746	1.19903	1783	1783	1775	2371	2528	2276
SPAC21E11.06	-0.315954	7.87052	-7.77896	9.20444e-05	0.000731178	1.19648	6518	6523	6008	5213	5107	5129
SPAC12B10.04	-0.384391	5.38752	-7.77326	9.24865e-05	0.000732393	1.29523	1209	1211	1070	931	878	890
SPAC630.04c	0.307665	7.75989	7.77253	9.25431e-05	0.000732393	1.1784	4819	4914	4480	6056	5894	5814
SPCC14G10.04	0.516015	8.59633	7.77326	9.24865e-05	0.000732393	1.32546	7611	7822	8158	11371	11565	11177
SPAC4D7.08c	-0.407663	9.09895	-7.75912	9.35941e-05	0.000739789	1.40952	15391	15565	15084	11823	11633	11618
SPCC1919.03c	0.363133	7.51855	7.75275	9.40974e-05	0.000742844	1.14429	4057	4161	3591	5216	5067	5036
SPAC30.02c	-0.325945	6.23853	-7.74776	9.44942e-05	0.00074505	1.17635	2091	2120	1954	1729	1611	1629
SPAC323.01c	-0.501472	6.19748	-7.74213	9.49443e-05	0.000747671	1.17537	2018	2167	2184	1580	1458	1506
SPAC19E9.03	0.568502	8.64225	7.73931	9.51705e-05	0.000747846	1.30368	8070	7473	8388	12094	12101	11672
SPCC1672.07	-0.380682	7.84678	-7.73836	9.52466e-05	0.000747846	1.15686	6226	6653	6272	5229	4887	4760
SPNCRNA.562	-0.507047	5.28715	-7.73746	9.53195e-05	0.000747846	1.2803	1202	1159	1038	879	819	721
SPAC12B10.14c	0.324822	6.76203	7.72239	9.65412e-05	0.000755565	1.12361	2413	2359	2298	3046	3084	2823
SPAPB1A10.12c	-0.387948	7.64756	-7.72278	9.65091e-05	0.000755565	1.1233	5877	5565	5293	4450	4521	3962
SPAC2F3.07c	0.995686	1.07089	7.71619	9.70488e-05	0.000757392	1.96306	35	37	35	73	72	72
SPBC12D12.02c	0.457636	4.96959	7.71533	9.71193e-05	0.000757392	1.31559	671	692	589	945	920	842
SPNCRNA.1138	-0.387865	6.41197	-7.71517	9.71321e-05	0.000757392	1.13452	2504	2410	2196	1978	1770	1743
SPAC17H9.08	-0.333889	6.5699	-7.7129	9.7319e-05	0.000757919	1.1232	2685	2644	2451	2208	2008	2022
SPBC685.09	-0.315685	6.90402	-7.70932	9.76149e-05	0.000758365	1.10597	3455	3207	3087	2695	2637	2576
SPNCRNA.1230	0.530615	5.42908	7.70952	9.75978e-05	0.000758365	1.23288	938	920	763	1237	1317	1263
SPAC17G6.11c	-0.417852	6.72777	-7.70605	9.78851e-05	0.000758755	1.1099	3190	3077	2686	2411	2228	2124
SPAPB2C8.01	0.373735	7.25111	7.70582	9.79039e-05	0.000758755	1.09523	3399	3203	3158	4194	4233	4346
SPAC10F6.12c	-0.629441	5.69995	-7.68784	9.94086e-05	0.000769478	1.17599	1698	1477	1547	1126	1073	892
SPAC2F7.14c	-0.454519	6.18857	-7.68631	9.95371e-05	0.000769536	1.12317	2218	2164	1859	1654	1493	1449
SPBC1539.10	-0.41374	7.11488	-7.6838	9.97496e-05	0.000770242	1.07644	4044	4066	3572	3217	2876	2770
SPCC794.12c	0.646191	11.4972	7.66901	0.000101011	0.000779038	1.66488	55638	57157	55652	86119	93518	86962
SPBC1A4.07c	-0.312935	7.2934	-7.66565	0.000101301	0.000780323	1.05616	4443	4332	3983	3604	3366	3401
SPAC23G3.04	-0.444044	4.94705	-7.66113	0.00010169	0.000780605	1.2684	875	866	881	669	626	652
SPCC4F11.02	0.441138	6.36867	7.66096	0.000101706	0.000780605	1.08674	1867	1658	1652	2454	2471	2178
SPNCRNA.1633	-0.38581	6.01422	-7.66264	0.00010156	0.000780605	1.11474	1875	1805	1708	1456	1311	1401
SPCC16C4.10	0.305761	7.74019	7.65529	0.000102197	0.000783431	1.06612	4743	4806	4475	5997	5966	5558
SPBC409.16c	-0.41495	5.982	-7.65345	0.000102358	0.000783717	1.10918	1871	1754	1699	1468	1332	1240
SPBC83.09c	-0.50057	4.91849	-7.64839	0.0001028	0.000786156	1.26244	904	932	791	678	598	599
SPAC3G6.01	-0.329384	6.87286	-7.6457	0.000103037	0.000787016	1.04687	3206	3236	3135	2652	2634	2421
SPNCRNA.628	0.744446	2.81629	7.64244	0.000103323	0.000788256	1.66898	143	141	113	220	231	220
SPAC29A4.11	0.878322	3.75909	7.63481	0.000103998	0.000792455	1.48512	222	228	282	464	466	420
SPAC29E6.01	0.515832	6.42641	7.62871	0.000104541	0.000795635	1.05333	1909	1843	1515	2509	2537	2531
SPBC839.11c	-0.324581	7.18154	-7.62139	0.000105196	0.000799668	1.01534	4144	4005	3705	3379	3180	3006
SPAC4G9.10	-0.394392	6.86439	-7.61607	0.000105676	0.000802358	1.01919	3424	3311	3015	2600	2358	2534
SPAC3A11.11c	0.465289	6.26254	7.61399	0.000105865	0.000802828	1.04951	1721	1650	1407	2200	2200	2246
SPAC19A8.05c	0.598149	6.0834	7.60773	0.000106433	0.000806177	1.05918	1243	1344	1438	2034	2071	2037
SPBC651.01c	-0.402787	9.17414	-7.60244	0.000106916	0.000808873	1.27626	16436	16515	15496	12278	12439	12288
SPAC977.16c	0.63399	5.67036	7.59663	0.000107449	0.000811938	1.09443	1002	1088	897	1477	1726	1483
SPBC14C8.02	-0.408052	6.90343	-7.58011	0.000108983	0.000822548	0.983628	3336	3307	3410	2716	2559	2389
SPNCRNA.614	-0.469581	4.06122	-7.57093	0.000109845	0.000828075	1.35705	496	481	454	341	351	352
SPBC30D10.03c	0.298233	7.144	7.565	0.000110407	0.000830335	0.962344	3186	3126	2988	3858	3860	3834
SPBC3H7.14	-0.381346	6.445	-7.5661	0.000110302	0.000830335	0.991089	2387	2474	2388	2006	1807	1815
SPAC27F1.06c	-0.40748	8.03138	-7.56181	0.00011071	0.000830651	1.01616	7301	7222	7432	5762	5770	5227
SPAC3G6.06c	-0.378918	5.64064	-7.56284	0.000110612	0.000830651	1.06001	1419	1432	1298	1093	1035	1095
SPAC110.04c	-0.671643	10.6006	-7.55279	0.000111573	0.00083229	1.44569	52146	51256	40481	30969	29923	29689
SPAC664.08c	-0.358635	7.52165	-7.5486	0.000111976	0.00083229	0.950075	4992	5223	4955	4252	3896	3819
SPACUNK4.15	0.551658	5.55241	7.5559	0.000111274	0.00083229	1.06982	1051	959	826	1352	1421	1415
SPBC16E9.05	-0.527521	8.21567	-7.55072	0.000111771	0.00083229	1.04022	9311	9370	7493	6318	5881	6034
SPBC18E5.03c	-0.402112	6.04358	-7.54981	0.00011186	0.00083229	1.00501	1885	1805	1838	1519	1351	1361
SPCC285.11	0.549642	6.38062	7.55011	0.00011183	0.00083229	0.98152	1641	1626	1756	2364	2551	2512
SPCC962.05	-0.420967	5.51619	-7.55557	0.000111306	0.00083229	1.07102	1306	1254	1301	1033	973	909
SPNCRNA.1001	-0.37274	5.40488	-7.55018	0.000111824	0.00083229	1.08182	1217	1221	1080	953	890	900
SPAC23C11.16	0.355738	6.22817	7.53874	0.000112931	0.00083841	0.979397	1601	1701	1532	2086	2134	2027
SPNCRNA.1185	0.658969	4.17729	7.53715	0.000113087	0.000838583	1.30551	333	395	324	578	526	571
SPNCRNA.776	0.431495	4.67985	7.53233	0.000113558	0.000841094	1.19762	570	557	484	752	739	702
SPNCRNA.103	1.50947	0.000518336	7.52981	0.000113804	0.00084194	1.80005	12	16	14	40	39	44
SPBC3D6.12	-0.333162	8.1022	-7.52682	0.000114099	0.000843136	0.992477	7794	7711	7005	6364	5913	5771
SPBC14C8.12	-0.45947	6.39851	-7.52435	0.000114342	0.000843955	0.954537	2641	2449	2146	1882	1773	1651
SPBC28F2.10c	-0.330891	6.88484	-7.52151	0.000114623	0.000845045	0.927945	3218	3220	3223	2634	2606	2522
SPAC3H1.08c	0.431286	4.70536	7.51778	0.000114993	0.000845812	1.17883	581	567	492	766	751	715
SPAC4A8.14	-0.342778	7.48076	-7.51786	0.000114985	0.000845812	0.918674	5192	5045	4459	3988	3855	3840
SPAC11E3.12	0.471485	7.37937	7.51508	0.000115262	0.00084681	0.916621	3746	3560	3039	5087	4923	4456
SPBPB2B2.08	1.56155	4.89273	7.51054	0.000115715	0.000849155	1.17122	480	384	400	965	1552	1316
SPAC23D3.04c	-0.355896	8.36889	-7.50879	0.00011589	0.000849458	1.02605	9508	9467	8346	7316	7139	7065
SPAC57A10.07	-0.394845	6.77192	-7.49684	0.000117095	0.000855334	0.90869	2963	3067	3106	2421	2323	2277
SPAC630.15	0.387111	6.22848	7.49725	0.000117053	0.000855334	0.939742	1654	1691	1444	2100	2146	2071
SPCC1393.13	0.42798	5.44835	7.49795	0.000116983	0.000855334	1.02671	942	880	923	1322	1250	1161
SPAC27E2.07	-0.402803	5.7838	-7.49337	0.000117448	0.000855941	0.976451	1657	1532	1435	1247	1120	1165
SPNCRNA.1224	0.626953	3.73769	7.49339	0.000117445	0.000855941	1.35126	260	260	261	382	423	416
SPBC887.11	-0.463715	5.1274	-7.48205	0.000118605	0.000863388	1.06512	1030	1035	930	811	700	686
SPBC800.02	0.71525	2.86491	7.47942	0.000118876	0.00086437	1.50856	138	137	138	216	245	226
SPAC23G3.03	0.345283	6.23642	7.47504	0.000119329	0.000866673	0.91747	1620	1684	1573	2084	2162	2015
SPAC11G7.03	0.411492	7.53007	7.46659	0.000120209	0.000872062	0.873514	4036	4113	3558	5131	5212	5359
SPAC1006.07	-0.557128	11.3918	-7.46076	0.000120819	0.000873499	1.4589	82380	81940	73630	55649	54493	53044
SPAC1952.10c	0.772484	5.45445	7.46206	0.000120683	0.000873499	1.00029	803	750	901	1600	1359	1276
SPCC1795.10c	-0.600743	6.1292	-7.46096	0.000120798	0.000873499	0.914295	2080	1967	2247	1513	1391	1289
SPBC4F6.18c	-0.47079	10.2325	-7.45591	0.00012133	0.000876197	1.30201	36713	34746	31966	25951	25103	24241
SPAC3A11.05c	0.472806	5.25992	7.45221	0.000121721	0.000877821	1.01391	809	749	814	1095	1126	1102
SPCC1450.03	-0.410843	6.36777	-7.45117	0.000121831	0.000877821	0.885538	2549	2321	2092	1822	1775	1681
SPBC2G2.06c	-0.305087	6.84003	-7.4483	0.000122136	0.00087902	0.858861	3265	3136	2892	2566	2517	2509
SPCC965.06	0.484797	6.52789	7.44415	0.000122579	0.000881206	0.870329	2008	1898	1785	2526	2898	2630
SPBC409.08	0.550158	8.76175	7.43458	0.000123604	0.000887575	1.03805	8790	8239	9124	13191	13467	12101
SPCC1840.05c	0.372368	6.51656	7.43315	0.000123759	0.000887681	0.859241	2056	2058	1765	2624	2611	2442
SPBC30B4.06c	-0.374367	6.52581	-7.42844	0.000124269	0.000889494	0.853961	2526	2545	2576	2056	1932	1974
SPNCRNA.1113	-0.387455	5.98155	-7.42823	0.000124291	0.000889494	0.893319	1848	1727	1696	1411	1418	1246
SPAC1556.06	0.649728	3.96262	7.42586	0.000124548	0.000890328	1.2422	287	298	323	520	460	458
SPBC646.06c	-0.501194	5.63327	-7.41867	0.000125333	0.000894933	0.924576	1455	1510	1344	1149	951	982
SPBC19C7.10	0.341615	7.63187	7.41379	0.000125868	0.000897747	0.826486	4409	4533	3926	5693	5457	5303
SPBC28F2.03	-0.887551	9.47547	-7.40969	0.000126319	0.000899953	1.14556	26101	26918	18616	12217	13098	13207
SPAC12B10.13	0.367748	5.85971	7.40653	0.000126669	0.000901434	0.884381	1278	1206	1243	1693	1639	1529
SPBC4F6.15c	-0.380195	4.88022	-7.40168	0.000127207	0.000904252	1.03275	834	845	771	674	624	604
SPAC25G10.08	-0.446111	10.0468	-7.39549	0.000127899	0.000908152	1.21744	30271	30180	29542	22863	22030	21883
SPAC959.03c	-0.417841	7.86437	-7.38578	0.000128991	0.000914884	0.82277	6515	6441	6674	5066	4769	5025
SPBC530.03c	-0.302277	6.49972	-7.38312	0.000129292	0.000916002	0.81078	2500	2549	2283	2045	2008	1950
SPAC977.02	4.30252	-2.1518	7.38111	0.000129521	0.0009161	1.12194	2	0	1	28	29	17
SPBC32H8.04c	-0.352715	7.60058	-7.38045	0.000129595	0.0009161	0.791473	5525	5390	5082	4435	4366	3873
SPAC23D3.01	-0.393298	6.30641	-7.37415	0.000130313	0.000920155	0.814674	2227	2344	2050	1831	1668	1595
ENSRNA049676666	2.62842	-2.70487	7.3728	0.000130467	0.000920222	1.06653	1	1	1	9	11	7
SPAC23H4.04	-0.35247	6.15231	-7.37078	0.000130699	0.000920834	0.82261	2055	1989	1820	1516	1583	1538
SPBC1539.04	-0.490484	7.4987	-7.36936	0.000130863	0.000920967	0.779016	5619	5534	4548	4030	3637	3584
SPBC2D10.11c	-0.289259	7.86026	-7.36798	0.000131021	0.000921058	0.80229	6428	6286	6016	5340	5242	4912
SPAC328.09	-0.289517	6.97304	-7.36395	0.000131486	0.000922285	0.772458	3498	3331	3298	2854	2791	2726
SPCC970.12	-0.471466	3.82946	-7.36519	0.000131343	0.000922285	1.20767	424	412	384	311	303	275
SPCC757.03c	1.17312	4.3932	7.36239	0.000131666	0.000922536	1.1092	418	392	237	771	785	773
SPAC144.05	0.344193	6.60949	7.36024	0.000131915	0.000923258	0.78334	2167	2038	2114	2774	2724	2607
SPAC31G5.18c	0.363234	5.68725	7.35878	0.000132084	0.000923426	0.857505	1120	1106	1085	1479	1378	1448
SPBC11C11.02	0.328738	7.21365	7.35448	0.000132584	0.000925904	0.757647	3276	3184	3195	4059	4165	4029
SPBPB21E7.09	-0.487269	4.88952	-7.33601	0.000134757	0.000939015	0.968511	854	865	839	678	570	599
SPCC1020.06c	0.613557	9.98208	7.33604	0.000134754	0.000939015	1.15185	21513	21297	17151	30883	31015	30201
SPBC18E5.07	0.448338	8.88858	7.33009	0.000135462	0.000942893	0.961197	9850	10093	9643	13059	13820	13913
SPAC1F12.10c	0.686034	6.51292	7.32868	0.000135631	0.000943035	0.760989	1947	1918	1431	2815	2962	2762
SPCC4E9.02	-0.627324	6.46988	-7.32681	0.000135854	0.000943558	0.760488	2522	2583	2945	1825	1742	1687
SPBC21C3.08c	-0.551102	10.2975	-7.32121	0.000136527	0.000946163	1.18259	39866	38821	32830	25657	25229	25662
SPCC306.11	0.475044	8.19654	7.32227	0.0001364	0.000946163	0.815193	6709	6133	5375	9000	8408	8088
SPCC1442.16c	0.776746	7.28782	7.31711	0.000137023	0.000948564	0.730642	3232	3127	2415	4580	5219	5297
SPAC22F8.04	-0.308168	7.51394	-7.31274	0.000137553	0.000949745	0.719768	4982	4963	4879	4230	4050	3830
SPAC2C4.06c	-0.417066	6.0061	-7.31418	0.000137378	0.000949745	0.780137	1852	1857	1708	1509	1289	1308
SPAC513.03	0.683793	5.44532	7.312	0.000137642	0.000949745	0.853146	811	789	912	1384	1471	1220
SPAC25H1.06	-0.281243	6.76394	-7.31042	0.000137835	0.000950047	0.727282	3026	2942	2770	2474	2390	2398
SPAC824.05	0.341276	6.02998	7.29643	0.000139551	0.000960831	0.760255	1471	1385	1377	1884	1849	1689
SPCC965.04c	0.382878	6.67844	7.29511	0.000139713	0.000960905	0.716455	2188	2159	2191	2805	2958	2853
SPNCRNA.1005	-0.483553	6.2903	-7.28802	0.000140593	0.000965915	0.73223	2249	2152	2350	1747	1613	1521
SPBC32F12.16	0.649103	4.2868	7.28344	0.000141164	0.00096879	1.03957	407	421	315	628	602	572
SPCC736.08	-0.302931	7.03617	-7.2722	0.000142578	0.000977437	0.680496	3655	3647	3333	2885	2969	2851
SPNCRNA.1280	0.382217	6.67811	7.25752	0.000144449	0.000988243	0.679411	2187	2159	2192	2803	2955	2854
SPNCRNA.1609	0.911878	3.18859	7.25739	0.000144465	0.000988243	1.24076	185	178	126	307	296	319
SPCC1450.01c	0.655449	3.56544	7.25073	0.000145324	0.000991979	1.15375	232	228	226	337	381	377
SPNCRNA.232	2.11333	-0.44602	7.25178	0.000145188	0.000991979	1.52956	8	6	11	45	31	36
SPBP8B7.10c	-0.301952	6.37917	-7.24799	0.000145678	0.000993331	0.68545	2335	2225	2179	1930	1800	1794
SPAC27D7.03c	1.14658	5.10418	7.24402	0.000146194	0.000993647	0.856967	489	524	694	1237	1443	1104
SPBC354.14c	0.37814	7.3835	7.24472	0.000146102	0.000993647	0.650844	3538	3511	3629	4669	4687	4664
SPNCRNA.941	0.870219	3.95562	7.2447	0.000146106	0.000993647	1.07357	304	327	216	528	529	490
SPAC25A8.02	0.381588	6.04134	7.23615	0.000147222	0.000998501	0.700143	1379	1411	1416	1854	1915	1769
SPAP8A3.05	0.31571	6.87879	7.23629	0.000147204	0.000998501	0.650027	2556	2572	2561	3310	3254	3109
SPBC649.04	-0.866087	7.00352	-7.23255	0.000147694	0.00100064	0.646817	4847	4675	3292	2372	2460	2176
SPAC1F3.02c	0.400402	6.41512	7.22632	0.000148517	0.00100449	0.662653	1781	1771	1864	2453	2453	2316
SPAC3F10.17	-0.466195	7.37695	-7.22466	0.000148738	0.00100449	0.63232	4962	5135	4200	3757	3392	3283
SPBC1271.05c	0.980368	6.53239	7.22565	0.000148605	0.00100449	0.662279	1470	1419	1971	3292	3222	3060
SPNCRNA.293	-1.81632	1.9053	-7.22169	0.000149132	0.00100608	1.45661	168	169	176	80	44	32
SPAC21E11.05c	-0.32988	6.76323	-7.21614	0.000149873	0.00100787	0.634413	2924	3050	2905	2511	2331	2299
SPCC338.07c	-0.277146	7.8906	-7.21673	0.000149794	0.00100787	0.656989	6458	6498	6093	5470	5316	5100
SPNCRNA.869	2.14131	-0.197588	7.21695	0.000149764	0.00100787	1.52483	7	9	14	38	50	46
SPBC337.06c	0.409738	6.21497	7.2119	0.000150441	0.00101062	0.662116	1597	1679	1431	2272	2054	1990
SPAPB1E7.11c	-0.430444	6.75127	-7.20631	0.000151194	0.00101354	0.625519	3263	3186	2698	2445	2231	2168
SPBC19C7.08c	-0.349219	6.05362	-7.20685	0.00015112	0.00101354	0.669574	1803	1851	1811	1531	1418	1388
SPAC23C4.02	0.645668	6.10832	7.20152	0.000151842	0.00101681	0.662941	1285	1261	1487	2211	2192	1958
SPAC4F8.01	0.507433	6.31785	7.19955	0.000152111	0.00101754	0.643379	1712	1769	1417	2435	2431	2152
SPBC1A4.06c	-0.59378	3.96089	-7.19279	0.000153033	0.00101942	1.01526	519	463	416	332	293	309
SPNCRNA.1615	-0.452909	5.05698	-7.19321	0.000152976	0.00101942	0.796262	983	982	877	774	665	661
SPNCRNA.446	1.55282	-0.686601	7.19613	0.000152576	0.00101942	1.4675	8	8	9	25	28	24
SPNCRNA.844	-0.496637	4.97361	-7.19432	0.000152823	0.00101942	0.813556	953	979	797	679	633	637
SPAC3H1.07	-0.65133	9.21523	-7.1894	0.000153498	0.00102144	0.885193	19641	19794	15302	11410	11406	12096
SPAC688.11	0.41798	7.80293	7.18225	0.000154484	0.00102693	0.615825	4581	4662	4843	6345	6374	6295
SPCC297.06c	-0.445376	5.43923	-7.16205	0.000157308	0.00104461	0.699436	1320	1274	1106	985	914	844
SPBC17G9.13c	-0.565156	3.61273	-7.15626	0.000158128	0.00104896	1.04989	399	342	345	259	247	234
SPAC869.05c	-1.06367	6.32721	-7.14984	0.000159043	0.00105393	0.601419	3450	2659	2442	1151	1588	1388
SPBP8B7.09c	-0.469331	7.02903	-7.14335	0.000159974	0.001059	0.553435	3819	3517	3876	2913	2745	2530
SPNCRNA.454	-0.544493	3.11188	-7.14212	0.000160152	0.00105907	1.13561	252	256	252	183	177	166
SPAC19G12.10c	0.476041	10.4703	7.13471	0.000161223	0.00106411	1.02497	29256	29894	28546	40990	42334	39966
SPNCRNA.1435	0.705845	2.72038	7.13453	0.00016125	0.00106411	1.20721	120	133	122	198	206	215
SPCC1840.04	0.341462	7.15187	7.13287	0.000161491	0.0010646	0.539581	3217	3225	2787	3965	4015	3814
SPBC16E9.06c	-0.481468	8.42659	-7.12331	0.000162888	0.0010727	0.6623	10612	10582	8604	7438	6916	7090
SPBC56F2.04	-0.339651	7.22993	-7.11573	0.000164006	0.00107894	0.520815	4208	3999	4105	3457	3294	3088
SPBC1289.02c	0.364887	6.11319	7.11448	0.00016419	0.00107904	0.572665	1564	1562	1331	1988	1919	1881
SPAC323.02c	0.371588	8.09094	7.11188	0.000164577	0.00108046	0.585472	5833	5976	5672	7451	7578	7815
SPBC1271.11	-0.367198	5.35817	-7.10968	0.000164904	0.00108149	0.65866	1135	1170	1091	883	932	846
SPBP8B7.21	-0.326429	7.60712	-7.10311	0.000165886	0.00108575	0.516843	5354	5223	5336	4394	4215	4220
SPCC320.07c	0.580656	4.17433	7.10304	0.000165896	0.00108575	0.88345	334	364	379	538	549	537
SPAC1834.01	-0.344708	8.55657	-7.10073	0.000166243	0.00108691	0.665253	10546	10113	10265	8478	8279	7874
SPCC663.05c	-0.456648	6.13011	-7.09887	0.000166523	0.00108762	0.556149	2011	1918	2055	1599	1417	1394
SPAC16C9.04c	0.273512	7.31111	7.09027	0.000167824	0.00109397	0.494433	3561	3635	3339	4458	4263	4145
SPBC8D2.01	0.422849	6.61421	7.09016	0.000167839	0.00109397	0.516052	2055	2245	1882	2796	2730	2830
SPBC543.09	0.355694	8.11898	7.084	0.000168778	0.00109896	0.561847	6035	5980	5902	7539	7908	7720
SPAC19G12.16c	0.523964	9.67187	7.08162	0.000169142	0.00109908	0.854375	17502	17760	14551	24757	23606	23668
SPSNORNA.47	0.732606	2.33422	7.08164	0.000169139	0.00109908	1.22683	106	97	82	161	164	153
SPCC569.09	0.65515	4.93707	7.0666	0.000171461	0.00111301	0.696396	612	618	551	1016	1031	801
SPBC4C3.10c	0.487501	7.63354	7.06472	0.000171754	0.00111377	0.484872	4363	4350	3566	5594	5989	5741
SPAC1B3.11c	0.523855	4.83347	7.06259	0.000172086	0.00111479	0.71006	630	608	501	857	808	855
SPAC22H10.12c	0.536987	7.76311	7.05555	0.00017319	0.0011208	0.48837	4764	4732	3735	6429	6470	6371
SPBC12D12.01	0.323574	7.18382	7.05291	0.000173606	0.00112137	0.458392	3121	3308	3050	4204	4007	3780
SPCC4B3.12	-0.282487	6.24854	-7.05275	0.000173632	0.00112137	0.499331	2136	2038	1942	1768	1686	1626
SPAC26A3.16	0.340822	7.96398	7.04541	0.000174793	0.00112773	0.497533	5339	5693	5156	6917	6892	6887
SPNCRNA.1294	0.706289	4.79635	7.04147	0.000175421	0.00113063	0.699296	497	495	601	879	909	824
SPAC1F12.08	-0.389542	4.98414	-7.03608	0.000176285	0.00113504	0.652292	867	929	846	714	681	642
SPNCRNA.1214	-0.284484	6.54968	-7.03411	0.0001766	0.00113592	0.461513	2535	2582	2421	2113	2069	2070
SPCC622.15c	0.860189	6.54477	7.03272	0.000176825	0.00113622	0.466605	1509	1596	1984	2966	3244	3056
SPBC17D1.02	-0.27889	5.96614	-7.02319	0.000178366	0.00114496	0.492864	1716	1684	1620	1433	1410	1338
SPAC2E12.02	0.53753	8.20814	7.02172	0.000178606	0.00114535	0.519906	5759	5760	6389	8851	8715	8689
SPBC31F10.12	-0.352813	6.8037	-7.02006	0.000178877	0.00114593	0.436217	3233	3201	2788	2549	2344	2393
SPBC215.13	0.348844	7.69502	7.01341	0.000179964	0.00115057	0.434159	4810	4431	4166	5967	5926	5354
SPCC63.06	-0.333444	6.75982	-7.01444	0.000179795	0.00115057	0.432263	3140	3037	2707	2508	2369	2241
SPBC1198.04c	0.299597	6.32301	7.01108	0.000180348	0.00115116	0.45211	1827	1752	1683	2230	2125	2188
SPBC18E5.15	0.617557	2.66509	7.01065	0.000180418	0.00115116	1.09509	125	126	121	199	202	177
SPAC16A10.06c	0.381648	5.54671	7.00411	0.0001815	0.0011569	0.523971	1019	990	976	1325	1391	1218
SPAP7G5.03	-0.327	8.26287	-6.99832	0.000182461	0.00116187	0.50084	8782	8681	7668	6957	6793	6456
SPNCRNA.1691	1.34055	2.34992	6.99498	0.000183021	0.00116426	1.15617	82	97	58	229	212	162
SPAC1F8.03c	-2.18002	2.25805	-6.99031	0.000183804	0.00116575	1.19879	255	321	184	59	79	35
SPBC428.15	-0.393636	5.44542	-6.9903	0.000183806	0.00116575	0.524929	1300	1253	1095	966	904	931
SPNCRNA.1258	1.02511	4.89801	6.99141	0.00018362	0.00116575	0.637862	607	584	366	1027	1058	1054
SPAC23C11.09	-0.340778	8.61855	-6.98918	0.000183993	0.00116578	0.566035	10979	10553	10708	8768	8578	8391
SPCC16C4.19	-0.395918	5.40248	-6.98643	0.000184457	0.00116755	0.5278	1220	1262	1062	925	897	894
SPBC409.21	-0.297904	6.47132	-6.98255	0.000185114	0.00117055	0.413589	2417	2425	2330	2086	1939	1874
SPBC839.12	-0.427719	6.02867	-6.98079	0.000185412	0.00117126	0.445308	1939	1893	1696	1517	1394	1247
SPAC23G3.02c	0.356216	7.21595	6.975	0.0001864	0.00117634	0.379139	3240	3106	3234	4265	4251	3884
SPBC1773.01	0.366799	7.36669	6.96112	0.000188788	0.00118906	0.36546	3441	3563	3592	4739	4704	4370
SPNCRNA.1585	0.567962	3.81549	6.96111	0.00018879	0.00118906	0.814943	291	303	250	425	450	389
SPAC22A12.03c	-0.437681	5.51686	-6.95675	0.000189546	0.0011891	0.480868	1404	1333	1158	1037	925	939
SPAC750.03c	2.51337	-1.86091	6.95814	0.000189304	0.0011891	1.04879	2	3	2	16	12	20
SPCC663.10	-0.272071	6.84115	-6.95778	0.000189367	0.0011891	0.371288	3107	3180	2903	2627	2585	2475
SPCC794.08	0.321512	7.34195	6.95692	0.000189516	0.0011891	0.360292	3721	3643	3234	4445	4579	4338
SPAC19G12.02c	0.321317	7.10235	6.95284	0.000190229	0.00119221	0.358452	3017	2941	3003	3804	3766	3743
SPBC36.05c	0.348974	7.07183	6.94548	0.000191519	0.0011983	0.351827	3041	3013	2651	3727	3665	3793
SPBC3E7.17	3.72645	-2.6855	6.94515	0.000191578	0.0011983	0.740217	0	1	1	10	17	14
SPNCRNA.1231	0.641677	4.11274	6.94117	0.00019228	0.00120151	0.735063	377	361	278	557	520	516
SPAC20H4.08	-0.355457	5.95873	-6.93966	0.000192548	0.001202	0.409162	1708	1719	1700	1366	1309	1375
SPCC553.10	0.673043	12.4903	6.93612	0.000193176	0.00120475	1.07309	110499	110597	111068	171155	184339	179976
SPNCRNA.1202	-0.563504	7.55494	-6.93231	0.000193854	0.00120779	0.347247	6195	5670	4884	3545	3970	3888
SPBC1289.07c	-0.524216	7.78941	-6.92866	0.000194508	0.00120949	0.360766	6769	6995	5666	4627	4236	4734
SPBC36.08c	-0.289123	7.47935	-6.92934	0.000194385	0.00120949	0.333836	4969	4859	4560	4085	4096	3721
SPAC26H5.09c	-0.835179	8.30703	-6.9266	0.000194877	0.0012106	0.450377	10856	12324	8154	5525	5984	5942
SPAC458.06	0.610411	4.65064	6.92294	0.000195535	0.0012135	0.606487	493	559	435	751	737	800
SPAC750.01	0.920864	5.00429	6.90265	0.00019923	0.00123523	0.524668	649	655	425	1057	1160	1044
SPAC3A12.08	0.444631	4.3848	6.90116	0.000199506	0.00123573	0.635242	444	456	405	589	591	615
SPBC12C2.08	0.438062	7.43493	6.8964	0.000200386	0.00123997	0.302481	3527	3517	3800	4978	5055	4804
SPAC4F8.03	-0.36429	6.94406	-6.88742	0.000202056	0.00124667	0.295938	3539	3606	3064	2801	2697	2504
SPAC589.05c	-0.557189	5.11224	-6.88814	0.000201923	0.00124667	0.480341	1129	1067	877	711	739	653
SPBC3D6.06c	-0.373258	7.70063	-6.88797	0.000201954	0.00124667	0.306421	6092	6011	5203	4478	4417	4566
SPAC167.06c	0.802079	2.78255	6.88178	0.000203115	0.00125198	0.948755	131	131	117	232	250	190
SPAC8E11.01c	-0.425719	5.07293	-6.87721	0.000203977	0.00125608	0.474588	938	972	933	741	668	731
SPNCRNA.1040	0.338298	5.68709	6.87605	0.000204197	0.00125621	0.373828	1172	1124	1046	1408	1488	1373
SPNCRNA.1211	0.275439	6.14786	6.87413	0.000204558	0.00125722	0.325219	1637	1588	1476	1947	1910	1889
SPAC22F3.02	0.586759	4.67008	6.86944	0.000205451	0.00126149	0.547468	493	471	554	785	784	727
SPBC28E12.04	-0.549816	5.82609	-6.86614	0.000206081	0.00126413	0.349974	1667	1557	1788	1154	1214	1087
SPBC15C4.01c	-0.253968	6.66224	-6.86045	0.000207171	0.00126593	0.278551	2773	2715	2577	2329	2273	2230
SPNCRNA.1470	-0.489389	5.25248	-6.86249	0.000206779	0.00126593	0.427989	1130	1205	968	791	779	800
SPNCRNA.231	3.29416	-3.42722	6.86057	0.000207149	0.00126593	0.54291	0	1	0	7	6	7
SPNCRNA.701	0.575043	4.24975	6.86123	0.000207023	0.00126593	0.624346	349	384	405	587	573	548
SPAPB1A11.01	1.22464	2.20301	6.83916	0.000211311	0.00128999	1.02499	80	81	59	196	141	186
SPBC18H10.15	-0.408324	5.97403	-6.83607	0.00021192	0.00129247	0.301818	1694	1786	1800	1364	1311	1343
SPBC1E8.05	0.570781	10.36	6.83037	0.000213047	0.0012981	0.704973	25740	25314	27578	39036	40426	38601
SPBC1105.07c	-0.286525	6.79123	-6.82853	0.000213413	0.00129908	0.240396	3031	3117	2778	2550	2482	2358
SPAC2C4.09	0.31281	5.954	6.82564	0.00021399	0.00130134	0.292391	1365	1338	1351	1712	1716	1660
SPNCRNA.638	-0.382187	4.96624	-6.82177	0.000214763	0.0013048	0.437336	900	860	842	729	666	624
SPAC22E12.08	-0.295281	5.55617	-6.82022	0.000215073	0.00130543	0.332558	1300	1308	1193	1053	1049	1026
SPAC7D4.08	-0.485022	5.99218	-6.81852	0.000215414	0.00130626	0.282743	2012	1901	1600	1429	1261	1279
SPCC737.02c	0.409535	8.97143	6.81557	0.000216007	0.00130736	0.461711	10969	11258	9610	14718	13795	14100
SPCP31B10.04	0.310938	7.17201	6.81571	0.00021598	0.00130736	0.215866	3104	3322	3019	4003	3927	3901
SPAC1B9.02c	0.301619	7.41486	6.80746	0.000217648	0.00131479	0.20712	3727	3817	3662	4622	4696	4636
SPCC285.10c	0.421089	5.75772	6.80817	0.000217504	0.00131479	0.296353	1101	1146	1162	1501	1567	1542
SPAC3C7.13c	0.348247	7.17273	6.80328	0.000218499	0.00131867	0.203215	3209	3239	2885	3916	4221	3863
SPCC306.09c	0.374729	8.15714	6.79493	0.000220212	0.00132775	0.274014	6100	6015	6159	7826	8176	7946
SPAC22F3.09c	0.523818	5.70876	6.79254	0.000220704	0.00132945	0.288238	1010	1030	1145	1561	1507	1548
SPAC5H10.12c	-0.360818	6.18546	-6.78316	0.00022265	0.00133864	0.228531	2015	1955	2043	1664	1569	1500
SPNCRNA.944	0.887579	3.66511	6.78417	0.000222439	0.00133864	0.673286	200	213	273	445	408	415
SPCC645.08c	-0.385008	8.38033	-6.7782	0.000223688	0.00134361	0.299629	9074	9249	9429	7165	7131	7190
SPBC15C4.04c	-0.425482	6.79399	-6.77276	0.000224831	0.0013492	0.182886	3225	2918	3242	2451	2329	2275
SPAPB24D3.04c	0.374898	4.33663	6.76364	0.000226762	0.00135822	0.503143	455	423	415	585	561	548
SPAPB2B4.04c	0.398551	6.7033	6.7639	0.000226706	0.00135822	0.17761	2199	2130	2290	2969	3033	2813
SPCC584.13	-0.495751	5.76428	-6.74983	0.000229722	0.00137466	0.235871	1559	1484	1668	1186	1135	1052
SPAC806.04c	-0.307383	6.96274	-6.74633	0.000230478	0.00137534	0.149057	3524	3449	3152	2705	2800	2755
SPBC16D10.10	-0.286091	6.87973	-6.7453	0.000230701	0.00137534	0.150633	3338	3214	2939	2675	2575	2606
SPCC306.04c	-0.402792	6.56937	-6.74619	0.000230509	0.00137534	0.165473	2618	2607	2737	2160	2041	1890
SPNCRNA.1238	1.09058	1.68529	6.74792	0.000230134	0.00137534	1.01454	51	61	48	113	135	99
SPAC19E9.01c	0.306094	7.14645	6.74424	0.000230932	0.00137542	0.142014	3268	3025	3001	3845	3984	3777
SPCC74.09	0.807335	4.49126	6.73475	0.000233004	0.00138646	0.449535	413	363	471	805	748	643
SPBC19C2.10	0.318139	7.00613	6.7334	0.000233299	0.00138692	0.134289	2848	2856	2690	3511	3446	3617
SPBPB8B6.05c	-0.989966	4.93757	-6.72737	0.00023463	0.00139352	0.357233	1184	1213	801	579	501	525
SPBC800.14c	0.793466	4.75109	6.71493	0.000237398	0.00140865	0.376282	563	546	397	891	958	774
SPAC607.09c	0.655128	3.99874	6.71286	0.000237861	0.00141008	0.525082	285	304	342	501	514	461
SPCC4G3.18	-0.376041	7.05831	-6.70767	0.00023903	0.00141569	0.106044	3769	3665	3635	3178	2756	2705
SPAC22F8.02c	-0.50989	4.27798	-6.70232	0.000240241	0.00142058	0.453231	629	533	529	412	385	400
SPAC4F8.07c	0.454382	10.1207	6.70205	0.000240303	0.00142058	0.537098	24234	24098	21165	31918	31650	32398
SPBPB21E7.10	3.7831	-1.47414	6.69564	0.000241763	0.00142788	0.878274	2	3	1	41	43	19
SPNCRNA.236	0.770813	3.82071	6.69023	0.000243003	0.00143387	0.541381	284	306	207	472	460	429
SPAC25B8.15c	-0.382391	5.48852	-6.6852	0.000244161	0.00143937	0.20349	1313	1316	1116	997	942	958
SPAC1399.03	-0.48331	7.22208	-6.67839	0.000245741	0.00144734	0.0735243	4325	4011	4547	3092	3250	2966
SPBC15D4.05	-0.331311	6.30048	-6.67674	0.000246127	0.00144827	0.108425	2163	2115	2167	1806	1747	1626
SPAP7G5.04c	-0.31935	8.04735	-6.67419	0.000246722	0.00145043	0.126906	7537	7504	6551	5936	5943	5568
SPBC119.12	-0.305306	6.32229	-6.6715	0.000247353	0.0014528	0.101243	2218	2218	2051	1820	1697	1787
SPAC3H1.03	-0.587776	4.88495	-6.66506	0.000248867	0.00145899	0.292895	912	990	753	614	612	551
SPBP4H10.17c	0.33517	6.20107	6.66546	0.000248773	0.00145899	0.104225	1685	1613	1482	2163	1933	1997
SPBC1604.05	0.754583	10.9104	6.66148	0.000249714	0.00146151	0.610445	39899	39463	29741	60401	60672	62936
SPBC18H10.08c	0.310341	5.1792	6.6613	0.000249756	0.00146151	0.22984	839	790	744	1024	985	963
SPAC15A10.04c	-0.298128	8.45011	-6.65444	0.000251389	0.00146894	0.184032	9854	9600	8850	7989	7600	7645
SPAC23C4.15	-0.323943	7.54483	-6.65402	0.000251489	0.00146894	0.0510453	5322	5194	4733	4403	3914	3992
SPBC83.08	-0.256706	7.9388	-6.65285	0.000251769	0.00146923	0.0866566	6801	6564	6200	5692	5477	5370
SPAC227.19c	-0.713282	4.09742	-6.64526	0.000253593	0.00147851	0.434937	585	490	527	383	324	283
SPAC2F3.02	-0.278534	7.81968	-6.63514	0.000256045	0.00149063	0.0530894	6429	6132	5608	5182	5053	4877
SPAC6C3.02c	1.09637	8.27135	6.63476	0.000256139	0.00149063	0.153448	5876	6066	3809	10744	11130	11380
SPBC27B12.03c	0.324616	7.24659	6.63251	0.000256688	0.0014912	0.0231241	3504	3394	3013	4438	4172	3924
SPBC3E7.05c	0.326551	7.52087	6.63243	0.000256707	0.0014912	0.0279288	4084	4213	3678	5138	4909	5104
SPBC776.15c	0.315074	7.44452	6.62843	0.000257689	0.00149554	0.0205617	3846	3938	3608	4654	4863	4795
SPBC691.04	-0.952007	6.66072	-6.62478	0.000258587	0.00149665	0.038944	3015	3157	4202	1857	1743	1758
SPBP16F5.06	-0.518311	6.44833	-6.62539	0.000258435	0.00149665	0.0463358	2499	2409	2721	1951	1750	1682
SPCPB16A4.07	1.45299	4.90604	6.6256	0.000258385	0.00149665	0.275863	341	387	651	1175	1330	1144
SPAC328.02	0.423176	5.93824	6.62312	0.000258996	0.00149707	0.0832108	1261	1277	1323	1787	1842	1607
SPNCRNA.1313	-1.83307	0.142778	-6.62257	0.000259132	0.00149707	1.02691	63	55	36	12	16	14
SPCC1442.09	-0.320162	7.03892	-6.62156	0.00025938	0.00149715	0.015564	3861	3580	3291	2980	2815	2876
SPAC13G6.09	-0.33156	6.63722	-6.61703	0.000260504	0.00149829	0.0257564	2701	2833	2610	2347	2166	2033
SPAC15A10.02	0.3343	7.49272	6.61696	0.000260521	0.00149829	0.010591	4140	4074	3510	5015	4960	4921
SPAPYUG7.05	-0.304488	8.123	-6.61904	0.000260004	0.00149829	0.0813818	7661	7972	6989	6314	6117	6047
SPNCRNA.812	0.990973	8.37232	6.6174	0.000260411	0.00149829	0.147795	6458	6653	4352	11123	11488	11768
SPAPB8E5.10	-0.325829	6.51332	-6.61459	0.00026111	0.00150032	0.0294498	2634	2578	2258	2010	2000	2000
SPAPB18E9.01	-0.375722	5.98195	-6.61148	0.000261887	0.00150342	0.0659439	1804	1665	1782	1433	1333	1322
SPBC11G11.01	0.291512	6.76556	6.60352	0.000263887	0.00151261	0.00584397	2488	2343	2340	3049	2875	2944
SPCC584.01c	-0.458597	8.08638	-6.60321	0.000263963	0.00151261	0.0621792	8258	7787	7226	5302	5965	5825
SPNCRNA.1513	0.460481	3.66618	6.59931	0.000264949	0.0015169	0.473394	267	275	246	361	364	371
SPAC977.17	-0.519873	6.37944	-6.59815	0.000265243	0.00151721	0.0216842	2351	2338	2587	1822	1760	1549
SPAC1F8.02c	3.45633	0.3415	6.59545	0.000265929	0.00151977	1.00028	5	8	17	108	142	69
SPCC1620.02	0.707646	2.30602	6.58988	0.00026735	0.00152589	0.742483	90	99	92	158	167	140
SPSNORNA.01	1.51912	-0.0490675	6.58937	0.000267481	0.00152589	0.995775	14	17	10	47	37	36
SPAC13A11.04c	0.430547	5.5386	6.58773	0.0002679	0.00152691	0.0947321	1014	1048	864	1291	1372	1314
SPSNRNA.06	2.56081	-2.73928	6.58589	0.000268373	0.00152823	0.567426	1	1	1	9	11	6
SPAP8A3.14c	-0.33607	6.41717	-6.58017	0.000269847	0.00153525	-0.00129995	2422	2252	2328	1989	1857	1762
SPAC2F7.17	-0.384223	5.6466	-6.57371	0.000271523	0.00154341	0.0633269	1448	1485	1249	1102	1116	1014
SPCC645.04	-0.298541	6.15252	-6.57255	0.000271826	0.00154375	0.00932183	1970	1965	1818	1591	1534	1600
SPAC23A1.09	-0.28137	5.90439	-6.57104	0.000272219	0.0015446	0.0297391	1629	1626	1558	1334	1340	1327
SPAC1556.01c	0.437414	6.40032	6.56938	0.000272653	0.00154524	-0.010679	1780	1678	1837	2524	2507	2219
SPAC212.10	2.90058	-2.32639	6.5669	0.000273302	0.00154524	0.643368	1	1	2	13	18	9
SPAC25B8.14	-0.380017	5.5091	-6.56786	0.00027305	0.00154524	0.0764373	1331	1336	1129	1009	957	975
SPBC2G2.13c	-0.258569	8.1494	-6.56689	0.000273304	0.00154524	0.0301221	7820	7629	7203	6513	6391	6220
SPAC8C9.04	0.416936	8.22837	6.56496	0.000273813	0.00154674	0.0466675	6432	6413	6089	7956	8778	8809
SPBC1347.08c	-0.272856	6.27282	-6.55942	0.00027527	0.00155221	-0.0140026	2117	2059	2020	1818	1709	1657
SPCC1795.11	-0.586795	10.9291	-6.55957	0.000275232	0.00155221	0.505749	56218	56029	62063	39417	38902	38940
SPAC23A1.07	-0.453954	5.06903	-6.55781	0.000275697	0.00155324	0.142419	1034	1008	832	723	696	694
SPBC14C8.14c	-0.300459	7.03924	-6.54662	0.000278677	0.00156864	-0.06416	3718	3500	3428	3122	2883	2737
SPBC13G1.08c	-0.305409	7.33362	-6.53582	0.000281589	0.00158269	-0.0803191	4421	4358	4292	3692	3701	3309
SPNCRNA.1009	-0.60739	4.27346	-6.53552	0.000281671	0.00158269	0.28075	640	616	493	422	375	359
SPAC5H10.06c	-0.579553	7.52307	-6.53426	0.000282013	0.00158321	-0.070178	5365	5014	6053	3804	3604	3683
SPBC3D6.13c	0.306209	8.0634	6.52511	0.00028451	0.00159582	-0.0280586	5946	5797	5793	7277	7553	7089
SPAC144.01	-0.604698	4.27328	-6.52326	0.000285017	0.00159725	0.267745	638	616	493	423	375	359
SPBC1861.04c	0.26394	5.96558	6.52119	0.000285589	0.00159905	-0.029212	1428	1420	1311	1753	1684	1609
SPAPB1E7.07	-0.356882	8.93133	-6.51486	0.000287338	0.00160742	0.138346	13765	13533	12993	10349	10954	10480
SPNCRNA.1367	0.964584	4.17886	6.50755	0.000289374	0.00161739	0.280052	362	375	228	656	641	572
SPCC1494.11c	1.48257	0.159173	6.5014	0.000291096	0.00162416	0.91405	13	20	15	47	52	38
SPNCRNA.1363	-0.370072	5.49017	-6.5018	0.000290984	0.00162416	0.00868519	1334	1282	1117	1005	941	967
SPAC17C9.06	0.370863	6.66916	6.4979	0.000292084	0.00162824	-0.102266	2137	2170	2217	2780	2895	2849
SPAC1805.15c	0.463722	5.83289	6.4895	0.000294468	0.00164009	-0.04739	1158	1125	1260	1737	1644	1551
SPCC1322.04	1.28569	9.92056	6.48794	0.000294912	0.00164112	0.289495	17973	17953	10702	35682	36958	38646
SPAC23G3.12c	-0.264883	7.93618	-6.48399	0.000296044	0.00164598	-0.0932818	6664	6555	6354	5580	5422	5458
SPBC119.05c	0.769336	6.72993	6.48269	0.000296416	0.00164661	-0.118059	1785	1857	2328	3343	3509	3353
SPAC11E3.05	0.3086	6.60883	6.472	0.000299503	0.00166086	-0.127621	2142	2102	2149	2804	2651	2550
SPNCRNA.1626	0.3632	7.17169	6.47259	0.000299331	0.00166086	-0.146146	3056	3076	3135	4138	4206	3717
SPAP27G11.12	0.331711	7.91801	6.46973	0.000300165	0.00166284	-0.10935	5612	5418	4730	6915	6544	6530
SPNCRNA.685	0.400291	4.66023	6.46897	0.000300385	0.00166284	0.127489	548	564	493	695	740	705
SPNCRNA.1100	1.03548	4.52626	6.46392	0.00030186	0.00166956	0.163967	489	443	273	821	811	803
SPAC1687.07	0.443655	3.84972	6.46156	0.000302552	0.00167048	0.289145	318	316	268	421	416	401
SPCC18.18c	0.338875	8.7358	6.46212	0.000302389	0.00167048	0.0415183	9350	9542	8763	11603	12288	11439
SPNCRNA.1251	-0.646024	3.50404	-6.45504	0.000304476	0.00167964	0.3581	326	367	342	250	200	219
SPBC15C4.02	-0.264099	6.64607	-6.4538	0.000304842	0.0016802	-0.149443	2748	2775	2486	2315	2221	2197
SPAC3H1.13	-0.30013	5.19325	-6.4476	0.000306685	0.0016889	-0.000299907	1030	999	931	815	806	807
SPAC1687.22c	1.02966	6.75378	6.44613	0.000307124	0.00168985	-0.155001	1656	1582	2363	3881	3889	3587
SPAC25G10.04c	1.28291	4.63843	6.44403	0.000307752	0.00169038	0.127827	339	311	557	1018	951	887
SPBC1773.10c	-0.387309	9.51242	-6.4447	0.000307553	0.00169038	0.170035	21488	21172	18394	16140	15672	15228
SPBC3D6.03c	-0.364554	6.06661	-6.44152	0.000308507	0.00169306	-0.123396	1982	1933	1645	1500	1420	1432
SPBC32H8.02c	0.492311	4.42221	6.43495	0.000310486	0.00170245	0.141083	495	420	406	643	655	577
SPAC30C2.08	0.291601	7.78467	6.42681	0.000312959	0.00171453	-0.172868	4849	4817	4860	6196	6018	5766
SPAC977.10	-0.441458	6.78861	-6.42397	0.000313826	0.0017178	-0.186988	3346	3348	2737	2406	2445	2148
SPBC36.13	0.862894	1.73419	6.42098	0.000314743	0.00172133	0.673223	65	61	53	126	109	96
SPAC1952.04c	0.441727	5.02697	6.41914	0.000315308	0.00172294	0.00226413	700	651	688	892	966	941
SPBC3E7.04c	0.323862	4.83176	6.4121	0.000317481	0.00173333	0.0312736	615	638	602	810	781	755
SPNCRNA.706	0.319311	5.25519	6.41096	0.000317837	0.00173378	-0.0504702	855	877	763	1085	1045	1013
SPAC13G7.04c	0.338796	7.4873	6.40157	0.000320767	0.00174768	-0.220392	4090	4107	3468	5068	5047	4755
SPACUNK12.02c	0.701942	5.72465	6.40015	0.000321211	0.00174768	-0.125418	916	957	1169	1748	1588	1629
SPCC18.13	-0.357119	6.69757	-6.40047	0.000321112	0.00174768	-0.208933	3015	2727	2828	2434	2206	2125
SPBC16C6.12c	-0.335848	6.80323	-6.39917	0.000321519	0.00174787	-0.214859	3252	3077	2830	2492	2331	2503
SPNCRNA.979	-0.30498	5.98841	-6.39821	0.000321823	0.00174802	-0.163626	1690	1744	1710	1461	1403	1344
SPAP4C9.02	-0.449782	5.27515	-6.39673	0.000322288	0.00174906	-0.0677913	1247	1081	984	837	810	794
SPBC1677.03c	-0.296834	8.53112	-6.39531	0.000322735	0.00174999	-0.0750498	10184	10033	9676	8528	7965	8105
SPBC83.05	0.359229	6.97795	6.39286	0.000323511	0.0017527	-0.227612	2675	2636	2805	3636	3518	3366
SPBC1271.03c	0.343795	6.22602	6.38561	0.000325815	0.00176368	-0.196842	1616	1695	1535	2071	2006	2136
SPCC970.02	-0.385785	5.54354	-6.38381	0.000326391	0.00176529	-0.126316	1341	1391	1163	1017	976	1013
SPAC24H6.08	0.432825	5.24253	6.37771	0.000328348	0.00177436	-0.0824982	769	772	836	1091	1069	1077
SPAC29E6.05c	0.278165	6.22711	6.37571	0.000328993	0.00177634	-0.208114	1739	1690	1535	2073	1988	2016
SPAC14C4.06c	0.512765	6.54947	6.37306	0.000329848	0.00177813	-0.229812	1906	1774	2046	2648	2839	2755
SPAC20H4.01	-0.350233	6.87266	-6.37209	0.000330164	0.00177813	-0.246869	3247	3120	3280	2661	2616	2376
SPAC23C4.08	0.263181	6.25084	6.37226	0.000330109	0.00177813	-0.213742	1719	1682	1666	2104	2072	1970
SPAC22H10.10	-0.383028	5.29366	-6.36829	0.000331396	0.00178278	-0.102876	1086	1098	1080	869	793	869
SPNCRNA.1071	1.68279	3.54265	6.3677	0.000331589	0.00178278	0.293309	167	241	96	454	601	498
SPBC32H8.03	-0.315069	6.78074	-6.36652	0.000331975	0.00178335	-0.249493	3098	3022	2826	2565	2499	2211
SPBC14C8.19	-0.38815	5.12572	-6.36382	0.000332856	0.00178657	-0.0772745	991	942	979	806	714	729
SPCC320.06	0.396004	6.9415	6.35948	0.000334275	0.00179267	-0.262685	2822	2714	2303	3711	3471	3221
SPBC29A3.11c	-0.747401	5.91018	-6.35836	0.000334645	0.00179315	-0.193007	2167	2077	1506	1235	1164	1029
SPAC17H9.10c	-0.332855	7.10126	-6.35415	0.000336033	0.00179906	-0.273282	3759	3643	3833	3121	3040	2856
SPAC186.01	3.75837	5.02181	6.35129	0.000336979	0.00179958	0.1251	208	192	247	2998	5425	1545
SPBC14F5.06	-0.299103	8.91278	-6.3519	0.000336776	0.00179958	-0.0408537	13448	13193	12358	10994	10570	10448
SPBC1604.06c	-0.279732	7.46058	-6.35211	0.000336707	0.00179958	-0.276912	4756	4889	4509	4169	3798	3819
SPAC57A7.12	-0.359173	9.22762	-6.34988	0.000337446	0.00180056	0.0181403	17047	16902	15599	13092	12674	13222
SPAC22G7.08	0.439207	5.36117	6.34814	0.000338023	0.0018016	-0.134851	894	790	893	1184	1175	1164
SPNCRNA.62	-0.59576	3.22081	-6.34759	0.000338207	0.0018016	0.302036	270	285	280	211	175	173
SPCC1393.10	-0.778943	5.97443	-6.34526	0.000338982	0.00180271	-0.213548	2383	2138	1570	1182	1225	1131
SPCC330.09	-0.298874	7.68772	-6.34609	0.000338705	0.00180271	-0.270188	5553	5496	5617	4702	4519	4477
SPAC11D3.04c	-0.747824	5.90225	-6.33224	0.000343358	0.00182445	-0.220568	2102	2134	1485	1133	1111	1157
SPAPB1A10.11c	-0.280638	6.02059	-6.3299	0.000344151	0.00182714	-0.241041	1727	1790	1699	1478	1430	1430
SPAC56F8.13	-0.410169	4.99723	-6.32482	0.00034588	0.00183478	-0.0950221	893	870	922	727	675	639
SPAC15A10.03c	0.293844	5.98469	6.32328	0.000346406	0.00183604	-0.244775	1463	1436	1276	1801	1733	1634
SPAC13F5.03c	0.870107	3.58252	6.32214	0.000346797	0.00183658	0.204913	224	200	222	409	467	327
SPAC24B11.14	-1.03898	1.55991	-6.3196	0.000347666	0.00183965	0.599779	102	98	107	45	63	44
SPAC6G9.03c	-0.323867	5.20689	-6.3157	0.000349008	0.00184368	-0.145572	1054	1020	940	861	777	795
SPNCRNA.691	0.531346	3.90993	6.31608	0.000348875	0.00184368	0.121391	319	280	313	478	420	433
SPBC14F5.01	-0.580997	4.83954	-6.31485	0.000349299	0.00184368	-0.0725999	967	811	784	647	524	559
SPBC2G2.14	-0.294725	6.82541	-6.30668	0.000352133	0.0018571	-0.316696	3030	3046	3080	2602	2508	2434
SPAC343.08c	-0.453556	5.60814	-6.30387	0.00035311	0.00186071	-0.221251	1485	1277	1407	1104	1004	965
SPBC29A10.16c	-0.25522	6.52573	-6.30129	0.000354013	0.00186388	-0.309286	2537	2526	2282	2152	2048	2014
SPBPB2B2.09c	-0.757076	6.621	-6.30047	0.000354298	0.00186388	-0.310704	3527	3522	2417	1900	1844	1834
SPBC83.15	-0.344068	7.70929	-6.29531	0.000356115	0.00187189	-0.323042	6030	5673	5496	4928	4646	4144
SPAC821.12	0.247797	7.47488	6.2855	0.000359592	0.00188548	-0.34958	4126	3999	3782	4925	4863	4502
SPBC577.09	-0.295561	5.34223	-6.28629	0.000359308	0.00188548	-0.201968	1096	1121	1059	939	875	883
SPCC569.05c	0.331097	7.50616	6.28706	0.000359034	0.00188548	-0.344805	4301	3977	3570	5210	5085	4737
SPCC613.10	0.332475	8.62463	6.28145	0.000361037	0.0018915	-0.178262	8946	8842	7903	10700	11199	10720
SPBC12C2.04	0.485373	7.88125	6.2786	0.000362057	0.00189528	-0.318028	5240	5269	4115	6944	6895	6705
SPAC31A2.15c	-0.26315	6.36236	-6.27268	0.00036419	0.00190488	-0.330717	2315	2175	2085	1931	1811	1792
SPBC25D12.03c	-0.349433	7.46536	-6.26451	0.000367158	0.00191882	-0.371388	4819	4799	4921	3877	4058	3612
SPAPB24D3.06c	-0.356936	6.11194	-6.25949	0.000368993	0.00192524	-0.32582	1947	2013	1753	1449	1533	1521
SPBP19A11.02c	0.330624	6.54455	6.25973	0.000368907	0.00192524	-0.355299	2054	2184	1843	2600	2557	2554
SPBC21D10.12	0.400492	8.79267	6.25787	0.000369587	0.00192676	-0.167851	9365	9607	9176	12144	12261	13141
SPNCRNA.1625	0.537701	5.21094	6.25643	0.000370118	0.00192795	-0.207247	725	834	688	1101	1203	992
SPAC13G6.14	-0.402481	6.3589	-6.25533	0.000370524	0.00192848	-0.348698	2333	2200	2349	1895	1774	1600
SPBP4H10.20	-0.310793	6.23544	-6.25206	0.00037173	0.0019316	-0.344099	2190	1957	1977	1729	1670	1586
SPNCRNA.1590	-0.41703	7.61954	-6.25273	0.000371481	0.0019316	-0.375244	5503	6129	4993	4154	4117	4264
SPAC17A5.13	-0.619114	5.67266	-6.24811	0.000373194	0.00193762	-0.287421	1478	1428	1719	1089	979	965
SPAPB24D3.08c	0.595188	7.44709	6.2444	0.000374574	0.00194092	-0.386852	3837	3805	2810	5386	5364	5057
SPBC28F2.08c	0.249355	7.28097	6.24418	0.000374656	0.00194092	-0.397532	3544	3491	3365	4164	4184	4141
SPNCRNA.1255	1.24364	0.906337	6.24394	0.000374746	0.00194092	0.613813	30	37	22	65	70	77
SPAC13D6.04c	0.300444	6.17438	6.23167	0.000379355	0.00196319	-0.361743	1707	1598	1448	2012	2006	1888
SPAC1250.01	0.407732	7.43567	6.22839	0.0003806	0.00196803	-0.410307	3534	3600	3829	4974	5105	4621
SPNCRNA.907	-0.846788	2.96696	-6.22713	0.000381076	0.00196889	0.230907	293	267	209	129	154	147
SPBC1826.01c	-0.674085	7.13894	-6.22417	0.000382204	0.00197089	-0.413281	3998	4062	4981	2882	2780	2567
SPCC1235.17	-0.776208	3.63608	-6.22382	0.000382338	0.00197089	0.083937	369	374	448	232	253	214
SPCC550.10	0.307739	5.30101	6.22368	0.000382393	0.00197089	-0.263146	905	861	818	1149	1045	1039
SPAC29A4.22	1.9236	-1.37687	6.22094	0.000383438	0.00197297	0.575476	4	5	4	24	17	14
SPAC9.10	-0.612128	5.73576	-6.22018	0.000383729	0.00197297	-0.326754	1858	1671	1319	1111	1071	996
SPNCRNA.1463	1.04429	3.31607	6.22043	0.000383635	0.00197297	0.156305	140	156	219	380	334	337
SPAC1952.09c	0.302247	6.8745	6.21516	0.00038566	0.00197858	-0.41922	2716	2592	2403	3175	3374	3056
SPAC1B3.01c	-0.300347	6.67599	-6.21492	0.000385754	0.00197858	-0.411627	2933	2844	2511	2274	2255	2258
SPNCRNA.1523	-0.329133	5.30697	-6.21527	0.000385615	0.00197858	-0.273561	1113	1066	1056	914	892	798
SPAC15A10.09c	0.586917	6.36018	6.21283	0.000386558	0.00198111	-0.39356	1846	1760	1327	2620	2428	2377
SPAC15A10.15	0.270301	5.85115	6.20767	0.000388558	0.00198815	-0.358915	1282	1283	1266	1593	1566	1510
SPNCRNA.1283	-0.903947	2.39001	-6.20795	0.000388447	0.00198815	0.32987	199	189	139	104	93	85
SPAC212.05c	2.7489	-4.22721	6.20364	0.000390126	0.00199296	0.0297585	0	0	0	3	2	4
SPCC1223.11	-0.279879	6.95961	-6.20388	0.000390033	0.00199296	-0.434611	3481	3435	3094	2921	2816	2593
SPAC31G5.21	0.405321	5.3733	6.19562	0.00039327	0.00200741	-0.304948	955	904	774	1166	1231	1120
SPBC106.16	0.361196	7.92266	6.19128	0.000394984	0.00201293	-0.412362	5471	5462	4716	6602	6715	6935
SPNCRNA.01	0.370574	4.33828	6.19135	0.000394958	0.00201293	-0.107986	463	443	392	583	560	551
SPBC14C8.13	-0.305915	7.30351	-6.18462	0.000397628	0.00202478	-0.463055	4423	4160	4224	3703	3541	3237
SPBC1105.15c	-0.26726	5.58626	-6.17891	0.000399912	0.00203315	-0.358992	1308	1294	1240	1125	1050	1051
SPBC17D11.01	0.465387	6.98282	6.17944	0.000399702	0.00203315	-0.46194	2600	2449	2810	3644	3619	3683
SPCC10H11.02	0.426299	4.52702	6.17412	0.000401841	0.00204133	-0.165713	509	448	494	666	664	637
SPAC17D4.02	-0.288745	6.34243	-6.17094	0.000403125	0.00204498	-0.441801	2317	2110	2116	1892	1775	1743
SPAC22G7.05	-0.276065	6.6309	-6.17074	0.000403204	0.00204498	-0.458768	2798	2592	2565	2341	2189	2109
SPCC1259.03	-0.418138	6.45881	-6.16675	0.000404827	0.00205158	-0.452967	2709	2509	2218	2068	1823	1729
SPAC3F10.15c	0.293787	6.86284	6.15956	0.000407761	0.0020648	-0.480585	2666	2634	2372	3299	3024	3175
SPNCRNA.987	1.75547	0.0477715	6.15361	0.000410209	0.00207554	0.584529	14	18	9	60	41	40
SPSNORNA.11	1.19633	1.23883	6.14215	0.00041497	0.00209796	0.467042	35	45	33	78	83	103
SPAC458.02c	-0.334112	8.95135	-6.13367	0.000418531	0.00211428	-0.272762	13663	13876	12998	10949	10523	11007
SPAC1782.11	-0.491041	7.29088	-6.13085	0.000419725	0.00211863	-0.520149	5024	4826	3787	3308	3261	3160
SPAPB1E7.03	-0.262158	7.12518	-6.12557	0.000421969	0.00212826	-0.526724	3830	3902	3429	3201	3130	3060
SPCC1259.10	0.266728	5.92895	6.1247	0.00042234	0.00212844	-0.459088	1435	1334	1283	1700	1655	1569
SPBPB7E8.02	0.333678	5.93038	6.12371	0.000422763	0.00212889	-0.459864	1375	1285	1301	1700	1780	1568
SPBC27.06c	-0.353756	6.28594	-6.12062	0.000424081	0.00213383	-0.493617	2286	2232	1928	1813	1617	1660
SPAC2G11.05c	0.328316	5.09272	6.11913	0.000424721	0.00213537	-0.340722	769	712	739	946	947	922
SPAC2F3.05c	0.706925	4.62329	6.11539	0.000426328	0.00214175	-0.245708	429	443	542	735	792	790
SPNCRNA.1244	-1.06462	2.57796	-6.11428	0.000426807	0.00214246	0.195776	181	204	250	112	92	99
SPCC18.05c	-0.378068	7.36987	-6.1125	0.000427577	0.00214294	-0.542163	4631	4429	4687	3482	3532	3677
SPCC330.08	-0.289271	7.19521	-6.11323	0.000427259	0.00214294	-0.541899	4193	4077	3567	3362	3225	3180
SPBC17D11.05	-0.367154	9.93848	-6.11127	0.000428111	0.00214393	-0.124897	27384	26968	26875	21772	21074	20822
SPAC16C9.01c	0.50334	5.58447	6.10801	0.000429521	0.0021493	-0.43271	1059	1062	832	1363	1491	1360
SPBC13E7.11	0.276829	5.7838	6.10532	0.000430693	0.00215274	-0.465446	1228	1257	1164	1480	1503	1483
SPNCRNA.1252	-0.425445	5.56177	-6.10488	0.000430886	0.00215274	-0.435478	1293	1297	1403	1030	971	1000
SPAC1705.03c	0.526696	11.2412	6.10057	0.000432769	0.00215735	0.0556965	52894	51389	43339	75539	71408	67256
SPAC9E9.11	1.16447	8.91806	6.10123	0.000432478	0.00215735	-0.308748	9439	9178	5623	17220	18487	17547
SPBC800.07c	-0.298469	7.15309	-6.10044	0.000432828	0.00215735	-0.555361	3811	3804	3891	3286	3168	3005
SPBC19F5.05c	-0.347559	8.75352	-6.09875	0.00043357	0.00215935	-0.352925	11882	12638	11025	9989	9092	9129
SPBC3B8.05	-0.242714	6.35544	-6.08647	0.000438999	0.00218297	-0.537339	2213	2231	2052	1920	1865	1762
SPBC4.06	0.304558	7.45821	6.08668	0.000438902	0.00218297	-0.569919	3954	4028	3569	4727	4774	4894
SPAC23C4.13	0.560912	5.43934	6.06022	0.000450858	0.00224019	-0.463052	927	956	736	1434	1311	1153
SPNCRNA.1171	0.301645	5.41902	6.05877	0.000451523	0.00224174	-0.466969	991	949	871	1177	1144	1178
SPBC1709.04c	-0.401068	5.47811	-6.05768	0.000452028	0.00224249	-0.476232	1189	1261	1286	1006	923	928
SPAC14C4.07	0.433462	6.93714	6.05578	0.000452901	0.00224507	-0.599074	2548	2406	2744	3667	3459	3368
SPCC825.01	-0.382909	8.30086	-6.05203	0.000454633	0.0022519	-0.502049	8899	8414	8930	7214	6970	6213
SPAC1296.04	0.462794	5.98759	6.04603	0.000457423	0.00226344	-0.551272	1356	1471	1133	1847	1788	1854
SPNCRNA.1515	0.324042	5.37742	6.04549	0.000457674	0.00226344	-0.474732	893	939	876	1122	1156	1147
SPCPB16A4.05c	-0.263956	6.7843	-6.04181	0.000459394	0.00227018	-0.609852	3076	2990	2747	2464	2459	2486
SPAC27D7.09c	0.959319	5.25251	6.03794	0.000461211	0.00227739	-0.445213	676	825	522	1133	1396	1411
SPNCRNA.348	1.5984	-0.743091	6.03381	0.000463154	0.00228521	0.461804	8	10	6	31	22	23
SPCC1795.12c	-0.399643	5.95148	-6.02874	0.00046556	0.00229529	-0.568328	1779	1657	1748	1467	1288	1223
SPNCRNA.1542	0.31284	4.92644	6.023	0.000468299	0.00230701	-0.416446	655	693	641	868	826	802
SPAC140.02	-0.416626	9.47344	-6.01845	0.000470481	0.00230702	-0.304232	19335	19820	20705	15672	15358	14352
SPAC1F5.07c	0.290569	5.8272	6.01995	0.000469757	0.00230702	-0.566166	1305	1263	1176	1596	1476	1555
SPAC22F8.06	0.432743	7.49222	6.01878	0.000470321	0.00230702	-0.642065	4129	3939	3283	4959	5228	5224
SPAC2F7.10	0.341061	5.99739	6.02075	0.000469377	0.00230702	-0.581979	1412	1312	1416	1841	1766	1690
SPAC4F10.09c	-0.68941	8.19464	-6.02223	0.000468667	0.00230702	-0.547325	8460	8302	10468	6110	5864	5098
SPBC1347.06c	0.33816	7.53082	6.01987	0.000469795	0.00230702	-0.641617	3891	4106	3996	4969	5239	5109
SPAC4G9.09c	-0.285994	8.97653	-6.0175	0.000470939	0.00230749	-0.397836	13863	13848	12862	11515	11216	10882
SPAC1786.02	0.725275	10.2771	6.01354	0.000472847	0.00231328	-0.178956	21552	22366	26682	38656	40980	38062
SPAC1805.03c	-0.43012	4.08996	-6.01425	0.000472505	0.00231328	-0.251725	517	459	466	385	365	331
SPCC4B3.20	-0.506723	3.13687	-6.00911	0.000474997	0.002322	-0.0512432	271	243	250	192	186	165
SPAC13G6.05c	0.286482	6.34668	6.00638	0.000476324	0.0023267	-0.626752	1747	1877	1750	2250	2210	2160
SPAC57A10.06	-1.44023	0.959676	-6.00419	0.000477393	0.00233013	0.363245	80	82	70	19	36	34
SPBC4.07c	0.292424	8.23302	5.99389	0.00048246	0.00235306	-0.58221	6814	6761	6264	8041	8151	8329
SPAC14C4.14	0.391577	10.0719	5.9899	0.000484438	0.00235728	-0.239396	24190	23605	20875	30278	30813	29700
SPAC29A4.04c	-0.320651	8.43062	-5.99058	0.000484101	0.00235728	-0.544925	9883	9841	8468	7869	7410	7462
SPBC1289.13c	-0.275442	7.07559	-5.99104	0.000483871	0.00235728	-0.677066	3705	3497	3618	3094	3034	2905
SPCC584.15c	0.746867	7.35495	5.98856	0.000485104	0.00235785	-0.671671	2880	2752	3655	5139	5355	5125
SPNCRNA.1632	-0.429898	6.43087	-5.98743	0.000485668	0.00235785	-0.652794	2433	2286	2590	1903	1771	1802
SPNCRNA.678	-0.270223	6.63635	-5.98752	0.000485623	0.00235785	-0.665061	2803	2596	2570	2359	2199	2120
SPBC609.04	0.527088	5.49134	5.98527	0.000486745	0.00236127	-0.556665	944	1002	796	1331	1467	1194
SPBC216.03	0.870962	5.96117	5.98275	0.000488004	0.00236557	-0.612385	1334	1283	815	2072	2083	2059
SPNCRNA.1051	-0.319559	8.43199	-5.9812	0.000488783	0.00236754	-0.555282	9890	9845	8473	7877	7425	7469
SPAC3G6.07	2.28659	-1.41453	5.9783	0.000490241	0.00237279	0.352806	4	3	4	27	22	13
SPNCRNA.497	1.92227	-0.206089	5.97267	0.000493086	0.00238475	0.411421	15	12	6	49	44	32
SPAC6G10.07	-0.27761	7.64856	-5.97118	0.000493842	0.00238659	-0.691449	5484	5294	5325	4665	4592	4184
SPBC16G5.16	0.506727	7.39064	5.96642	0.000496263	0.00239585	-0.703018	3199	3341	3746	4870	5038	4825
SPBC1703.13c	0.570464	9.67787	5.96593	0.000496511	0.00239585	-0.328355	17637	18062	13713	24340	24991	24139
SPAC30C2.04	-0.33622	9.22423	-5.96292	0.000498052	0.00240146	-0.411383	16440	17093	15500	13419	12690	13108
SPAC2C4.15c	0.559591	6.19657	5.95744	0.000500872	0.00241323	-0.669004	1397	1691	1337	2047	2253	2266
SPAC19G12.03	0.328924	5.32048	5.95401	0.000502643	0.00241992	-0.568376	882	925	795	1112	1079	1108
SPAP11E10.02c	0.667173	5.82335	5.95005	0.000504697	0.00242797	-0.638799	1037	995	1263	1678	1785	1790
SPAC222.07c	0.336336	6.74858	5.94575	0.000506938	0.00243323	-0.717061	2398	2470	2121	2943	2905	3054
SPAC4F8.14c	-0.337167	8.26193	-5.94599	0.000506815	0.00243323	-0.630735	9049	8737	7466	6798	6679	6629
SPBC21B10.04c	0.248074	7.8179	5.94692	0.000506327	0.00243323	-0.703023	5324	5107	4685	6114	6070	5928
SPBC106.13	0.54374	5.12741	5.94299	0.000508385	0.00243833	-0.542785	654	678	786	1045	1058	1002
SPAC19G12.07c	0.294313	7.10154	5.93744	0.000511305	0.00244727	-0.7386	2992	3057	2991	3699	3710	3793
SPBC19F5.02c	-0.478555	6.80539	-5.93725	0.000511405	0.00244727	-0.728674	3204	2981	3457	2486	2215	2285
SPBC20F10.02c	-0.364298	4.95217	-5.93738	0.000511337	0.00244727	-0.518265	916	886	764	700	681	630
SPCC11E10.02c	0.249061	6.21998	5.93385	0.000513201	0.00245218	-0.700218	1742	1683	1563	2026	2053	1909
SPNCRNA.937	-0.336098	4.89998	-5.93418	0.00051303	0.00245218	-0.511884	802	869	776	682	648	627
SPCC191.08	-0.295093	5.80402	-5.9324	0.00051397	0.002454	-0.663339	1572	1478	1463	1334	1206	1179
SPAC1687.03c	-0.283108	6.27559	-5.92882	0.000515879	0.00246127	-0.710134	2193	2163	1886	1782	1738	1655
SPAC11D3.01c	0.429047	4.92796	5.92753	0.000516563	0.00246149	-0.523609	620	715	583	897	890	816
SPAC16A10.04	0.449912	6.17053	5.92728	0.0005167	0.00246149	-0.702393	1690	1559	1272	2121	2071	2012
SPAC3A12.03c	-0.363837	5.69379	-5.92648	0.000517123	0.00246166	-0.656172	1465	1475	1343	1228	1035	1105
SPAC1B3.02c	-0.24361	6.77165	-5.92238	0.000519324	0.00247029	-0.745174	2947	2908	2812	2521	2410	2466
SPAC167.07c	0.569151	6.39646	5.92065	0.00052025	0.00247284	-0.725098	1611	1550	1902	2611	2557	2391
SPNCRNA.630	1.28444	5.4729	5.91624	0.000522632	0.00248231	-0.605657	587	557	1018	1779	1794	1530
SPAP8A3.04c	1.84029	8.4865	5.91441	0.000523622	0.00248368	-0.567851	5309	6526	2825	16761	16370	16833
SPBC3B9.06c	0.362865	5.42673	5.91426	0.000523703	0.00248368	-0.631041	985	890	892	1301	1132	1165
SPBC29A3.03c	0.606307	4.86353	5.91054	0.000525724	0.0024914	-0.527479	524	559	644	873	942	830
SPAP27G11.13c	-0.595442	6.87467	-5.90806	0.000527075	0.00249223	-0.764164	3917	3867	2841	2525	2279	2238
SPBC215.05	0.962744	10.2586	5.90826	0.000526967	0.00249223	-0.298078	24419	25044	15927	40787	42784	42242
SPCC320.03	0.526239	7.45969	5.90849	0.000526839	0.00249223	-0.766454	3338	3446	3937	5189	5403	4975
SPAC31A2.06	-0.326436	7.93081	-5.90409	0.000529246	0.00249878	-0.736608	6512	6611	6789	5666	5212	5193
SPBC24C6.04	-0.431618	10.1582	-5.90436	0.000529098	0.00249878	-0.322583	34692	33723	28708	24003	24373	24065
SPAC4D7.04c	-0.36283	6.88225	-5.89926	0.000531905	0.00250947	-0.775587	3307	3104	3346	2754	2530	2390
SPAC14C4.09	-0.285405	7.24973	-5.89519	0.000534153	0.00251821	-0.790116	4365	3980	3916	3607	3275	3282
SPAC977.15	1.05713	4.52716	5.88915	0.000537511	0.00253216	-0.470836	440	472	280	936	869	671
SPBC776.10c	-0.291329	6.9744	-5.88766	0.000538345	0.00253421	-0.792048	3496	3264	3384	2961	2757	2662
SPAC1F12.09	0.243241	6.43954	5.88153	0.000541779	0.00254715	-0.775464	1977	1968	1871	2338	2292	2325
SPCC338.06c	0.611113	7.0624	5.88133	0.000541896	0.00254715	-0.799902	3066	2806	2107	4239	4044	3894
SPAC15A10.08	0.246297	5.73835	5.87763	0.000543982	0.00255507	-0.718706	1228	1193	1152	1435	1448	1399
SPNCRNA.1320	0.382978	4.42176	5.87457	0.000545714	0.00256131	-0.481133	443	475	450	621	624	558
SPAC11E3.13c	0.533344	7.08326	5.87284	0.000546696	0.00256403	-0.810674	3070	2938	2276	4224	4164	3655
SPAC4F10.17	1.53765	2.1888	5.86878	0.000549011	0.00257298	0.0211079	55	48	103	189	214	168
SPAC959.04c	-0.239316	6.06858	-5.8621	0.000552844	0.00258904	-0.770289	1796	1838	1684	1568	1524	1459
SPAC20G4.03c	0.57609	4.61371	5.85617	0.000556266	0.00260314	-0.539336	451	469	547	722	760	717
SPAC6C3.04	0.65375	8.89722	5.85304	0.000558083	0.00260973	-0.599523	10359	10233	7463	14726	15126	14160
SPAC14C4.10c	0.542497	4.62198	5.84954	0.000560127	0.00261352	-0.549171	576	493	427	751	778	665
SPCC1259.09c	-0.221239	7.31946	-5.85012	0.000559786	0.00261352	-0.842948	4333	4282	3965	3677	3635	3585
SPNCRNA.586	-0.464063	4.92364	-5.85076	0.000559415	0.00261352	-0.610586	913	888	801	694	672	546
SPAC3H1.01c	-0.296496	6.3848	-5.84616	0.000562102	0.00262081	-0.812564	2396	2202	2159	1969	1881	1712
SPBC11C11.10	-0.471768	7.7277	-5.84513	0.00056271	0.00262172	-0.824882	6515	6706	5115	4678	4280	4304
SPNCRNA.1648	0.541302	7.67205	5.84356	0.00056363	0.00262408	-0.828672	4527	4539	3373	6157	6092	5877
SPCC320.09	-0.319402	5.168	-5.84162	0.000564774	0.00262748	-0.67	1029	934	966	822	778	770
SPBC19F8.02	-0.503609	5.68127	-5.83622	0.000567964	0.00263808	-0.755825	1602	1637	1245	1060	1097	1019
SPBC25H2.03	0.330416	6.36464	5.83619	0.000567986	0.00263808	-0.822407	1775	1748	1835	2417	2249	2146
SPBC30D10.13c	-0.353347	8.51803	-5.83553	0.000568374	0.00263808	-0.702869	10930	10351	9041	7889	7946	8039
SPNCRNA.927	0.253301	5.50087	5.83496	0.000568712	0.00263808	-0.735728	1026	1020	977	1224	1240	1177
SPAC4D7.13	-0.233284	7.77493	-5.82694	0.000573503	0.00265836	-0.846149	5807	5878	5626	5055	5049	4782
SPBP4H10.03	-0.452766	6.64929	-5.82324	0.000575725	0.00266672	-0.852768	2778	2704	3093	2197	2055	2069
SPAC25G10.05c	-0.48702	9.05467	-5.81931	0.000578097	0.00267575	-0.607735	16562	16708	12974	11064	10795	11201
SPAC17G6.15c	-0.263486	7.61066	-5.81433	0.000581118	0.00268778	-0.874595	5125	5449	5043	4521	4303	4320
SPBC16A3.17c	0.572098	6.94137	5.80821	0.000584856	0.0027031	-0.881622	2337	2287	2750	3966	3741	3354
SPBP35G2.16c	0.41557	7.57758	5.80298	0.000588075	0.002716	-0.885892	4236	3811	4019	5507	5913	4882
SPAC23A1.02c	0.722211	5.61947	5.80161	0.000588918	0.00271792	-0.780689	851	844	1123	1572	1535	1537
SPBC409.19c	0.230269	6.92364	5.79912	0.000590461	0.00272306	-0.892719	2846	2786	2547	3331	3275	3084
SPBC543.10	-0.261607	6.59319	-5.79764	0.00059138	0.00272532	-0.881063	2611	2537	2558	2286	2132	2081
SPBC32H8.12c	-0.486546	11.2946	-5.79641	0.000592143	0.00272686	-0.278111	77528	75793	64282	52390	51418	52445
SPBC23G7.13c	0.582542	5.53257	5.7914	0.000595262	0.00273924	-0.783779	841	979	943	1308	1564	1312
SPAC12G12.04	0.63079	9.8088	5.78922	0.000596625	0.00273956	-0.508175	19604	19193	14326	27116	27421	27588
SPAC17A5.10	0.415159	5.486	5.78942	0.000596505	0.00273956	-0.783082	918	905	1010	1277	1288	1244
SPNCRNA.112	-0.361641	5.88426	-5.78979	0.000596273	0.00273956	-0.835526	1783	1637	1474	1393	1257	1195
SPNCRNA.1297	-0.484002	4.10018	-5.78334	0.000600325	0.00275456	-0.515961	543	514	427	384	348	337
SPAC688.03c	0.737977	4.05874	5.77967	0.000602644	0.00276321	-0.505858	381	327	245	517	570	502
SPAC12B10.15c	0.498632	3.6517	5.77393	0.000606293	0.00277793	-0.428539	245	265	260	352	393	355
SPAC16C9.06c	-0.243527	7.4551	-5.77226	0.000607361	0.00278013	-0.931276	4695	4644	4578	4178	3892	3818
SPCC576.16c	1.10202	1.53217	5.77181	0.000607647	0.00278013	0.0203491	60	35	51	109	107	95
SPAC10F6.13c	0.527381	8.56785	5.76911	0.000609379	0.00278241	-0.766354	8203	8587	6451	11199	11181	11145
SPAC2F3.18c	-0.307625	6.04436	-5.76899	0.000609459	0.00278241	-0.875549	1861	1858	1641	1568	1389	1418
SPBC887.06c	0.369066	4.73735	5.7695	0.000609127	0.00278241	-0.667743	564	569	577	725	775	732
SPNCRNA.618	0.494498	4.50989	5.76664	0.00061097	0.0027873	-0.622299	453	445	503	653	705	633
SPAC17A2.13c	0.398716	9.56229	5.76302	0.000613304	0.00279595	-0.580432	16944	16980	14259	21206	21702	21008
SPAC1002.03c	0.254423	7.68716	5.7623	0.000613769	0.00279606	-0.929042	4870	4647	4260	5518	5654	5409
SPAC1B3.17	-0.682151	5.80438	-5.75492	0.000618557	0.00281585	-0.861579	1560	1629	2005	1128	1096	1025
SPCC569.03	0.544503	4.85757	5.75024	0.000621619	0.00282777	-0.711882	680	572	508	944	795	847
SPNCRNA.1260	0.979684	0.850916	5.74389	0.000625804	0.00284477	0.0908406	26	32	35	64	64	57
SPAC4G9.20c	-0.334313	6.77273	-5.7426	0.000626654	0.00284659	-0.952772	2892	2988	3072	2380	2419	2373
SPAC343.13	-0.247676	5.52192	-5.74029	0.000628185	0.00285151	-0.849195	1258	1239	1154	1089	1026	992
SPBC12D12.06	-0.31178	5.29466	-5.73138	0.000634134	0.00287646	-0.821039	1069	1056	1062	903	827	865
SPBP8B7.12c	-0.448892	7.26655	-5.73065	0.000634623	0.00287662	-0.978708	4811	4715	3683	3360	3201	3148
SPBC3B9.09	-0.386072	4.72861	-5.72855	0.00063603	0.00288095	-0.713692	745	737	727	630	530	551
SPAC3F10.08c	-0.342099	6.26969	-5.72575	0.000637917	0.00288744	-0.944214	2198	2023	2115	1835	1662	1560
SPBC1348.05	2.97217	-3.59021	5.7241	0.000639034	0.00289043	-0.230494	0	1	0	7	5	4
SPAC3G9.15c	-0.212645	7.18243	-5.721	0.000641139	0.00289789	-0.991367	3936	3842	3626	3438	3268	3236
SPNCRNA.1067	0.821091	1.26539	5.72028	0.000641626	0.00289804	0.00157313	44	39	48	84	78	72
SPAC17G8.01c	-0.413744	6.73201	-5.7175	0.000643516	0.00290039	-0.980094	2950	2814	3192	2381	2227	2179
SPAC20H4.10	0.263899	7.32956	5.71877	0.000642655	0.00290039	-0.99489	3616	3495	3590	4398	4415	4173
SPBC1105.06	-0.286624	5.80254	-5.71777	0.00064333	0.00290039	-0.911388	1586	1556	1360	1280	1263	1181
SPAC1B1.03c	-0.305986	8.26339	-5.714	0.000645911	0.00290912	-0.89899	8261	8139	8496	6975	6869	6531
SPAC1D4.03c	0.332155	5.46172	5.70652	0.00065105	0.00293019	-0.877553	944	962	957	1238	1281	1126
SPAC212.02	2.9347	-4.13879	5.70207	0.000654132	0.00294197	-0.293112	0	0	0	6	3	2
SPCC417.15	0.731404	4.428	5.70068	0.000655098	0.00294424	-0.676887	417	343	468	756	630	659
SPBC16E9.08	0.437477	4.02366	5.69533	0.000658829	0.00295891	-0.601618	324	340	355	492	461	440
SPBC1685.13	0.797249	9.43386	5.69382	0.000659891	0.00296159	-0.681559	14973	14104	9853	22913	23397	20842
SPBC577.10	0.379677	7.85495	5.69067	0.000662103	0.00296942	-0.992419	5237	5347	4287	6604	6523	6322
SPBC21C3.20c	0.419916	6.56353	5.68917	0.000663156	0.00297204	-1.00472	1916	1912	2142	2785	2727	2549
SPNCRNA.1458	-0.353409	4.6495	-5.68633	0.000665161	0.00297824	-0.747159	740	702	629	576	557	504
SPNCRNA.32	0.722823	4.9985	5.68589	0.000665476	0.00297824	-0.811576	610	517	702	1114	921	994
SPNCRNA.679	0.652758	3.47143	5.68477	0.000666268	0.00297968	-0.489166	219	204	221	315	393	320
SPNCRNA.214	0.513973	4.15345	5.68096	0.000668972	0.00298967	-0.645356	390	319	380	541	526	498
SPAC3A12.16c	-0.306571	7.06839	-5.67801	0.000671074	0.00299286	-1.03865	3940	3731	3244	3084	2986	2825
SPAPB2B4.01c	0.346701	5.57632	5.67798	0.000671097	0.00299286	-0.92818	999	1014	1073	1352	1326	1283
SPBPB2B2.14c	2.14586	-2.94338	5.67811	0.000671004	0.00299286	-0.133069	1	1	1	5	6	8
SPAC869.03c	2.01683	-1.60878	5.67702	0.000671786	0.00299383	0.064936	5	4	2	19	17	12
SPBC25H2.09	0.320606	6.22439	5.6723	0.000675171	0.0030066	-1.0034	1756	1698	1439	2101	2072	1984
SPBC646.05c	-0.27205	8.35197	-5.6717	0.000675599	0.0030066	-0.930476	9304	8897	8027	7641	7248	7021
SPCC4F11.03c	-0.280728	7.02378	-5.67056	0.000676422	0.00300816	-1.04618	3413	3664	3384	3046	2807	2848
SPCC1183.07	-0.37195	8.55748	-5.66972	0.000677025	0.00300874	-0.887098	10511	9891	10840	8482	8323	7634
SPAC19A8.16	0.828594	2.75316	5.66672	0.000679194	0.00301416	-0.34867	155	124	95	234	229	200
SPNCRNA.1378	0.550937	5.23136	5.66697	0.000679017	0.00301416	-0.880556	845	823	614	1208	1105	1044
ENSRNA049676312	0.629814	3.11659	5.66312	0.000681804	0.00302363	-0.437064	189	183	139	292	256	248
SPNCRNA.1314	-1.98289	-1.55973	-5.65752	0.000685889	0.00303963	0.0522222	16	18	14	6	4	2
SPAPB1A10.08	0.598596	5.98626	5.65666	0.000686519	0.0030403	-0.998188	1126	1213	1438	1959	1949	1835
SPBC713.12	0.301915	8.43455	5.65307	0.000689154	0.00304847	-0.933929	7583	7560	7568	9298	9786	9227
SPCC576.03c	1.07896	10.4663	5.65284	0.000689323	0.00304847	-0.558785	27390	28415	17099	46145	52039	53280
SPAC23H3.02c	0.337363	5.48723	5.65071	0.000690896	0.0030533	-0.946935	985	1043	886	1305	1271	1143
SPAC4F10.15c	0.466551	6.70294	5.64916	0.000692042	0.00305412	-1.0586	2116	2059	2292	2851	3028	3147
SPBC17D11.03c	0.421832	6.13353	5.64958	0.00069173	0.00305412	-1.02217	1388	1456	1585	2073	1997	1915
SPAC6G10.02c	-0.374898	6.89614	-5.6464	0.000694083	0.003061	-1.0704	3337	3097	3464	2715	2550	2445
SPNCRNA.871	0.918651	3.53524	5.64247	0.000697001	0.00307174	-0.546006	192	169	265	413	375	383
SPCC553.09c	-0.230027	6.54173	-5.63825	0.000700157	0.00308351	-1.06522	2508	2439	2408	2132	2121	2083
SPBC1E8.04	1.37327	1.11114	5.63554	0.00070219	0.00309032	-0.0554338	42	34	23	81	107	71
SPAC959.05c	0.318687	5.36345	5.62667	0.00070889	0.00311765	-0.955532	924	903	860	1114	1210	1066
SPCC794.01c	0.557927	4.06206	5.62599	0.000709405	0.00311775	-0.68922	309	322	376	510	500	480
SPBC25D12.06	-0.295647	7.01723	-5.62396	0.000710946	0.00312236	-1.10097	3456	3428	3579	2924	2858	2830
SPAC4F10.04	-0.27415	5.60866	-5.62273	0.000711883	0.00312432	-0.999311	1349	1373	1195	1116	1107	1046
SPAP19A11.05c	0.234517	6.15244	5.62005	0.000713934	0.00313116	-1.05986	1649	1609	1524	1963	1939	1785
SPCC23B6.01c	0.482082	8.20155	5.61606	0.000716995	0.00314242	-1.02163	6585	6610	5105	8419	8659	8532
SPBC14F5.04c	0.877162	12.2091	5.61188	0.000720212	0.00315434	-0.370825	93765	98611	66440	147775	155760	169298
SPAC18B11.04	0.284526	6.37794	5.60461	0.00072586	0.00317652	-1.09469	1963	1768	1768	2381	2276	2111
SPNCRNA.986	0.270327	7.80755	5.60407	0.000726275	0.00317652	-1.10282	5065	5191	4634	6043	5931	6147
SPAC17A2.08c	-0.331198	5.62946	-5.60158	0.000728225	0.00317848	-1.02633	1359	1334	1355	1157	1114	985
SPBC1347.09	-0.296051	7.01115	-5.60161	0.0007282	0.00317848	-1.12728	3482	3478	3459	3114	2802	2675
SPBC29A10.17	-0.214663	7.02122	-5.60214	0.000727788	0.00317848	-1.12713	3528	3474	3206	3061	2916	2907
SPNCRNA.475	-2.95011	-0.732553	-5.59878	0.000730418	0.00318587	0.0336598	58	50	22	7	4	4
SPAC18G6.11c	-0.402472	7.38062	-5.59465	0.000733666	0.00319784	-1.13902	4580	4436	4963	3817	3506	3369
SPAC23H3.05c	-0.317992	6.81659	-5.58426	0.000741912	0.00323156	-1.14125	3260	3228	2716	2609	2417	2415
SPBP19A11.01	-0.209299	7.39736	-5.57989	0.000745407	0.00324234	-1.15918	4495	4518	4207	3897	3884	3769
SPNCRNA.639	0.614977	9.45938	5.58031	0.000745072	0.00324234	-0.811254	15340	15342	11263	21010	21481	21610
SPCC338.04	0.43862	4.96266	5.57507	0.000749293	0.00325701	-0.940234	639	706	609	880	846	951
SPBC56F2.08c	-0.602411	7.98733	-5.57412	0.000750057	0.00325811	-1.10522	7133	6937	8827	5281	5084	4835
SPBC31F10.13c	0.335585	7.51741	5.56945	0.000753842	0.00327231	-1.16536	3911	3841	4143	5134	5147	4883
SPAC6F12.09	0.252774	7.26359	5.56049	0.000761169	0.00330186	-1.182	3589	3569	3123	4310	4082	3970
SPAPJ695.01c	1.60145	-0.697217	5.55757	0.000763571	0.00330777	-0.0030311	11	8	6	28	31	20
SPBC18E5.08	-0.465187	5.03423	-5.5577	0.000763461	0.00330777	-0.974899	1007	888	916	783	673	607
SPBC405.06	-0.246357	5.69322	-5.55198	0.000768198	0.00332328	-1.09483	1416	1348	1344	1209	1147	1143
SPNCRNA.1141	0.797702	3.49878	5.55258	0.000767694	0.00332328	-0.64654	195	183	253	396	334	367
SPNCRNA.541	-0.245937	5.69343	-5.55091	0.000769086	0.00332486	-1.09613	1416	1348	1344	1209	1148	1143
SPCC63.14	0.551995	8.06996	5.54874	0.00077089	0.00333039	-1.12269	5902	6000	4438	7770	8162	8022
SPBC16G5.02c	0.443381	6.04741	5.54694	0.000772394	0.00333376	-1.13616	1489	1495	1173	1866	1866	1952
SPNCRNA.790	-0.402735	3.86544	-5.54655	0.000772719	0.00333376	-0.74241	438	416	369	322	325	287
SPBP23A10.11c	0.333606	10.0448	5.54499	0.00077402	0.00333711	-0.757311	23157	23510	21962	29444	28916	28988
SPAC4G9.14	-0.279496	5.52478	-5.54376	0.000775053	0.0033393	-1.08106	1280	1233	1185	1025	1085	970
SPAP27G11.02	0.337561	5.7417	5.54195	0.000776569	0.00334356	-1.11127	1254	1188	1036	1461	1463	1508
SPAC17C9.12	0.281502	8.10482	5.53576	0.00078179	0.00336148	-1.13981	6157	6498	5586	7521	7505	7327
SPAC8E11.12	0.749994	1.03766	5.53608	0.000781525	0.00336148	-0.169046	38	38	38	71	65	59
SPAC227.15	0.571289	7.48007	5.52892	0.000787607	0.00338421	-1.2089	3414	3249	4065	5379	5466	5186
SPCC24B10.03	-0.417664	4.24251	-5.52485	0.000791084	0.00339685	-0.850485	590	535	474	431	388	388
SPAC6F12.11c	0.250907	6.27996	5.52155	0.000793921	0.00340673	-1.18693	1803	1815	1583	2138	2077	2030
SPAC16.02c	0.269155	7.80133	5.51816	0.000796848	0.00341698	-1.20597	5045	5170	4617	6003	5902	6131
SPBC19C7.07c	-0.373695	6.22179	-5.51499	0.00079959	0.00342643	-1.18984	2167	2230	1819	1701	1660	1477
SPAC16C9.03	-0.254583	8.22412	-5.51389	0.000800548	0.00342822	-1.14451	7981	7991	7831	6833	6940	6410
SPBC2A9.06c	-0.266434	6.05681	-5.51068	0.000803346	0.00343327	-1.18199	1867	1732	1726	1593	1468	1414
SPCC1223.06	-0.210371	7.03456	-5.5107	0.000803323	0.00343327	-1.23664	3512	3456	3314	3115	3018	2850
SPNCRNA.583	0.468097	3.25056	5.5119	0.00080228	0.00343327	-0.646459	194	204	191	293	286	246
SPAC21E11.03c	0.636501	6.73497	5.50565	0.000807749	0.00344976	-1.22953	1887	1942	2443	3303	3292	3184
SPBC3E7.10	-0.375759	7.26914	-5.50441	0.000808836	0.00345209	-1.24785	4620	4565	3690	3399	3248	3328
SPAC19G12.14	0.377281	7.9716	5.50002	0.000812708	0.00346115	-1.20254	5146	5279	5638	7118	6914	7046
SPBC106.10	0.228861	6.22126	5.49993	0.000812786	0.00346115	-1.20857	1734	1686	1605	1974	2018	1957
SPBC1A4.05	-0.245087	7.45592	-5.49969	0.000812994	0.00346115	-1.25354	4599	4708	4625	4094	3896	3893
SPNCRNA.532	0.992479	5.81667	5.49953	0.000813139	0.00346115	-1.15475	1220	1126	661	1920	1917	2033
SPCC830.04c	-0.557504	2.51153	-5.49853	0.000814023	0.00346259	-0.498802	183	164	157	128	115	103
SPAC23C4.06c	-0.353922	5.42084	-5.49256	0.000819324	0.00348281	-1.12465	1308	1186	1048	965	910	917
SPAC3F10.10c	-0.250196	5.91361	-5.49133	0.000820424	0.00348516	-1.19188	1634	1685	1479	1402	1358	1312
SPBC19C7.09c	-0.258987	6.38205	-5.48611	0.000825099	0.00350034	-1.23675	2287	2175	2190	2000	1834	1787
SPCPB1C11.01	-0.503142	5.42823	-5.48649	0.000824761	0.00350034	-1.1301	1355	1133	1258	863	989	819
SPNCRNA.606	0.791385	2.93186	5.48428	0.000826749	0.003505	-0.601847	133	158	132	242	294	209
SPBC3B9.11c	0.240019	6.72277	5.47941	0.000831147	0.00352129	-1.26296	2444	2398	2246	2778	2845	2832
SPAC22F8.10c	-0.330898	6.33654	-5.47667	0.000833629	0.00352945	-1.24464	2114	2214	2282	1798	1792	1717
SPAC1834.04	-0.600967	9.37539	-5.47488	0.000835262	0.00353401	-0.951747	22788	21838	15836	13162	13308	13207
SPNCRNA.615	-0.405659	5.62255	-5.47206	0.00083783	0.00354252	-1.17893	1505	1465	1184	1106	1018	1031
SPAC20H4.11c	0.562728	4.51062	5.46673	0.000842726	0.00356085	-0.974714	443	417	513	743	666	632
SPAC56F8.08	0.284309	7.16589	5.46583	0.000843549	0.00356196	-1.29365	3184	3403	2916	3866	3939	3868
SPAPB1E7.10	-0.438174	4.96548	-5.46077	0.000848224	0.00357932	-1.07771	964	939	760	714	636	630
SPBC16A3.05c	0.222662	7.51462	5.45808	0.000850718	0.00358747	-1.30153	4160	4292	3897	4917	4948	4689
SPAC17G6.12	0.430712	5.59965	5.44902	0.000859186	0.00361598	-1.20242	978	1015	1053	1320	1508	1324
SPAPJ696.01c	0.235322	7.25651	5.45015	0.000858126	0.00361598	-1.3145	3452	3392	3429	4183	4072	3967
SPCC16A11.09c	-0.27099	7.69599	-5.44905	0.000859161	0.00361598	-1.30004	5506	5883	5233	4884	4703	4335
SPAC1687.14c	0.360047	4.41431	5.44557	0.000862439	0.00362247	-0.98267	505	441	428	622	600	558
SPAC22A12.08c	0.22707	6.98419	5.44586	0.000862171	0.00362247	-1.31302	2915	2863	2754	3398	3494	3203
SPBC1778.04	0.237535	5.79222	5.44621	0.000861834	0.00362247	-1.23315	1319	1232	1172	1498	1488	1446
SPAC16E8.18	-0.504605	4.25088	-5.44309	0.000864782	0.00362752	-0.94864	572	532	550	438	413	332
SPAC20G4.01	-0.265924	6.63549	-5.44352	0.000864379	0.00362752	-1.30247	2657	2680	2610	2392	2136	2158
SPAC19B12.02c	0.568213	10.6266	5.4335	0.000873922	0.00366344	-0.798342	35229	34106	26196	49431	46442	45905
SPAC23D3.02	-0.278326	6.05809	-5.43233	0.000875036	0.00366569	-1.27636	1913	1835	1613	1540	1508	1411
SPBC1198.01	0.354921	4.47129	5.43018	0.0008771	0.00366989	-1.01349	462	503	465	635	640	573
SPNCRNA.557	0.28652	5.12501	5.43009	0.000877194	0.00366989	-1.14715	772	761	770	991	956	892
SPAC19A8.01c	0.224146	6.14141	5.4275	0.000879691	0.00367792	-1.28943	1648	1574	1540	1911	1915	1795
SPCC1840.08c	-0.397828	5.99531	-5.42613	0.000881006	0.003681	-1.27726	1749	1716	1877	1474	1289	1335
SPNCRNA.1039	-1.1921	1.23583	-5.41828	0.000888633	0.00371042	-0.325753	76	79	107	45	37	32
SPNCRNA.563	-0.329256	4.65311	-5.41256	0.000894232	0.00373135	-1.07354	723	717	619	584	538	532
SPNCRNA.794	0.285462	4.93115	5.41065	0.000896112	0.00373674	-1.13261	686	670	658	865	847	770
SPBC365.14c	-0.252833	7.92496	-5.40856	0.000898177	0.0037429	-1.32297	6520	6690	6142	5371	5569	5459
SPAC1A6.05c	-0.263986	6.58353	-5.40672	0.000899997	0.00374557	-1.34449	2580	2663	2422	2126	2126	2195
SPCC777.09c	-0.401596	9.76651	-5.40731	0.000899413	0.00374557	-0.966482	24752	26914	21630	18866	18845	18102
SPNCRNA.1031	0.490527	6.62201	5.40457	0.00090212	0.00375194	-1.34701	1956	1920	2192	2710	2890	3005
SPNCRNA.1296	-0.545143	3.83972	-5.40289	0.000903795	0.00375645	-0.906303	468	448	352	317	283	274
SPNCRNA.1616	0.813618	5.08203	5.4012	0.00090547	0.00376095	-1.16403	543	559	791	1139	1052	1111
SPAC1F12.05	-0.385507	6.60576	-5.39945	0.000907224	0.00376578	-1.35353	2637	2605	2881	2235	2049	1998
SPBC32H8.09	0.326207	4.97673	5.39603	0.000910645	0.00377751	-1.15897	705	677	667	889	817	892
SPCC16A11.02	-0.253451	7.17175	-5.39418	0.000912498	0.00378273	-1.38087	3890	3745	3841	3305	3336	3091
SPAC8C9.10c	-0.284325	6.23594	-5.39018	0.000916527	0.00379695	-1.3421	2129	1971	1967	1817	1663	1559
SPBC947.14c	0.512559	5.27551	5.38736	0.000919383	0.00380631	-1.22321	874	863	646	1234	1123	1059
SPCP1E11.02	0.572633	6.1104	5.38613	0.000920624	0.00380896	-1.33402	1283	1287	1581	2014	2144	2046
SPAC3G9.06	-0.33744	8.53461	-5.38368	0.000923118	0.0038168	-1.23411	10502	11035	8982	8215	8086	7987
SPAC23A1.20	-0.371334	4.2533	-5.37378	0.000933258	0.00385621	-1.03464	513	541	527	426	430	379
SPBC3H7.13	0.36168	6.16434	5.3729	0.00093416	0.00385743	-1.35677	1498	1496	1622	2104	2026	1863
SPAC6F12.16c	-0.423542	7.74541	-5.37086	0.00093627	0.00386364	-1.38719	5826	5755	6555	4811	4600	4262
SPBC19C7.06	-0.32021	9.38302	-5.36955	0.000937622	0.0038667	-1.0779	18908	18901	16689	14845	14354	14807
SPAC2E1P3.02c	0.35662	4.69997	5.36764	0.000939607	0.00386987	-1.13695	584	598	496	738	751	679
SPBC16C6.01c	-0.326126	5.3253	-5.36792	0.00093932	0.00386987	-1.25937	1169	1139	973	935	875	830
SPCC1739.10	0.386407	8.05918	5.36646	0.000940836	0.00387242	-1.34938	5407	5701	5905	7263	7861	7356
SPAC664.09	-0.232666	6.67032	-5.36389	0.000943506	0.0038809	-1.4008	2740	2678	2630	2338	2260	2323
SPBC146.10	-0.262818	5.98208	-5.35866	0.000948978	0.00389835	-1.35892	1674	1690	1683	1498	1415	1340
SPBC409.13	-0.48065	6.46928	-5.3587	0.000948938	0.00389835	-1.3948	2769	2815	2108	1923	1777	1828
SPAC22H12.03	0.375074	5.48889	5.35592	0.000951859	0.00390561	-1.29969	1023	1038	826	1319	1259	1193
SPBC1683.02	-0.354096	4.47767	-5.35581	0.000951972	0.00390561	-1.10513	672	615	553	505	491	456
SPCC18.12c	-0.482396	6.0967	-5.35384	0.000954056	0.00391163	-1.37346	2091	2188	1658	1569	1361	1345
SPAC23H3.10	-0.23355	6.80225	-5.35273	0.000955231	0.00391392	-1.41985	2969	2913	2939	2569	2560	2453
SPNCRNA.405	0.750564	2.30497	5.351	0.000957053	0.00391886	-0.623851	110	78	91	174	145	153
SPBC1198.14c	0.513495	5.12035	5.34902	0.000959154	0.00392493	-1.24156	698	737	687	954	1178	944
SPCC24B10.18	-0.670246	6.3084	-5.34663	0.000961699	0.00393282	-1.39698	2503	2925	1957	1689	1583	1372
SPBC18H10.06c	-0.346478	4.86326	-5.34462	0.000963846	0.00393906	-1.19883	862	832	705	657	640	605
SPCC1672.08c	0.241487	6.61723	5.34229	0.000966339	0.00394671	-1.42457	2208	2195	2178	2660	2572	2630
SPAC23D3.08	-0.237476	6.65817	-5.33554	0.000973592	0.00397378	-1.43489	2836	2728	2444	2360	2261	2232
SPAC11G7.01	-0.401033	7.56948	-5.33322	0.000976099	0.00398146	-1.44735	5268	4948	5717	4214	3974	3996
SPAC24B11.13	-0.285884	7.69832	-5.33231	0.000977086	0.00398293	-1.44153	5565	5463	5686	4899	4486	4486
SPBC9B6.08	0.299876	8.29575	5.33091	0.000978613	0.00398659	-1.35015	7273	7268	6175	8653	8511	8507
SPBC1773.02c	0.566916	6.24962	5.3288	0.000980901	0.00399335	-1.41542	1460	1370	1754	2315	2331	2174
SPCC306.05c	0.230806	5.75519	5.32713	0.000982723	0.00399821	-1.37359	1259	1213	1163	1439	1478	1393
SPAC637.13c	0.425799	7.55207	5.32482	0.000985243	0.00400551	-1.45698	4311	4260	3316	5333	5462	5229
SPAPB24D3.10c	0.519386	5.36651	5.32434	0.000985777	0.00400551	-1.3153	914	944	677	1222	1209	1210
SPBC15D4.01c	0.269444	5.14575	5.32348	0.000986714	0.00400675	-1.28077	788	777	785	994	941	927
SPAC1565.08	-0.414816	9.56473	-5.32272	0.000987549	0.00400758	-1.10276	22951	22811	18358	16028	16505	15759
SPCC736.09c	-0.38751	3.93967	-5.31869	0.000991975	0.00402297	-1.03226	422	418	439	348	319	320
SPAC31A2.12	-0.232856	6.53155	-5.31644	0.000994461	0.00402792	-1.45196	2541	2368	2404	2160	2105	2022
SPAC630.03	0.229697	7.48775	5.3165	0.000994402	0.00402792	-1.47469	4168	4213	3720	4883	4713	4722
SPAC1F3.03	0.338801	6.92934	5.31482	0.000996261	0.00403125	-1.47055	2483	2690	2734	3438	3395	3264
SPBC1709.13c	-0.228872	5.33458	-5.31398	0.000997188	0.00403125	-1.32797	1080	1074	1030	940	920	885
SPNCRNA.1383	-0.276254	5.29137	-5.31429	0.000996849	0.00403125	-1.31937	1086	1084	974	932	838	853
SPNCRNA.121	-0.827237	1.8361	-5.30698	0.00100498	0.00406018	-0.576975	135	114	99	77	67	54
SPAC4G8.06c	-0.332186	6.90355	-5.30432	0.00100796	0.00406962	-1.48262	3454	3389	2970	2843	2686	2354
SPAC1952.17c	0.328529	5.50125	5.30265	0.00100983	0.00407202	-1.36769	963	958	1027	1268	1240	1228
SPAC8F11.06	-0.555034	4.94361	-5.30273	0.00100975	0.00407202	-1.26342	1045	960	739	655	624	593
SPAC1F5.10	-0.486595	7.0864	-5.29669	0.00101657	0.00409656	-1.4966	4404	4227	3207	2946	2799	2716
SPAC17H9.09c	-0.38516	5.59351	-5.29581	0.00101757	0.00409799	-1.3894	1428	1422	1185	1123	962	1033
SPCC61.03	0.283981	6.55724	5.29271	0.00102108	0.00410955	-1.48199	2212	2042	1973	2477	2687	2495
SPBC36.06c	-0.253762	5.97649	-5.29056	0.00102354	0.00411684	-1.4418	1717	1638	1657	1472	1369	1407
SPAC17G6.17	-0.340398	5.99574	-5.28833	0.00102609	0.00412185	-1.44576	1713	1717	1806	1510	1352	1320
SPNCRNA.1365	0.917607	1.84776	5.28889	0.00102545	0.00412185	-0.597665	70	76	47	133	108	124
SPBC16E9.01c	-0.362098	5.97851	-5.28587	0.00102891	0.00413058	-1.44704	1853	1874	1507	1434	1330	1335
SPCC16C4.17	0.297594	4.93547	5.28522	0.00102965	0.00413097	-1.28606	709	702	604	841	841	817
SPAC1A6.03c	0.223738	8.36092	5.28329	0.00103187	0.00413473	-1.39563	7675	7547	6978	8845	8763	8560
SPAC22F3.03c	0.518531	4.87138	5.28327	0.00103189	0.00413473	-1.2728	570	546	675	877	870	830
SPNCRNA.1496	-0.428317	5.09056	-5.28249	0.00103279	0.00413572	-1.3189	1048	1029	819	772	702	692
SPCC18B5.01c	-0.283305	8.189	-5.28078	0.00103477	0.00414104	-1.4337	8267	7731	7488	6673	6853	5994
SPNCRNA.934	-0.294414	4.66467	-5.27759	0.00103846	0.00415317	-1.24045	685	688	674	600	553	534
SPBC27.02c	-0.391785	5.00903	-5.27206	0.00104489	0.00417628	-1.31622	924	869	896	757	626	692
SPAC17H9.03c	-0.335252	4.79492	-5.26998	0.00104733	0.00418076	-1.27629	798	750	725	640	563	619
SPBC11G11.02c	0.233381	7.16887	5.27038	0.00104687	0.00418076	-1.53225	3266	3204	3204	3883	3771	3838
SPCC1223.12c	0.513566	3.27719	5.26727	0.0010505	0.0041908	-0.944951	194	211	186	289	314	252
SPNCRNA.1576	-0.498564	4.31323	-5.26645	0.00105148	0.00419205	-1.17669	643	605	484	434	388	411
SPAC1527.03	-0.287397	7.28899	-5.26329	0.00105519	0.00420424	-1.54241	4223	4304	4070	3812	3463	3180
SPAC23D3.09	-0.233593	6.66463	-5.25889	0.0010604	0.00422004	-1.52933	2845	2735	2453	2373	2273	2247
SPBC31F10.09c	-0.338468	5.72663	-5.25826	0.00106115	0.00422004	-1.45397	1485	1380	1477	1201	1093	1176
SPBC32F12.03c	0.85599	7.84161	5.25864	0.0010607	0.00422004	-1.49454	4565	5107	3052	7327	7768	7637
SPAC7D4.10	-0.225128	7.33165	-5.25586	0.00106401	0.00422874	-1.55234	4459	4315	3938	3824	3713	3447
SPBC1685.05	0.383849	5.57835	5.25289	0.00106756	0.0042402	-1.43956	975	992	1086	1328	1360	1329
SPNCRNA.1639	-0.39657	4.68971	-5.24351	0.00107884	0.00427965	-1.28647	797	736	633	598	542	519
SPNCRNA.1667	-0.318059	5.42423	-5.24376	0.00107854	0.00427965	-1.42852	1258	1208	1038	985	913	936
SPAC3C7.07c	-0.295726	5.86832	-5.23826	0.00108521	0.00430225	-1.4952	1658	1538	1525	1377	1339	1175
SPBC428.14	0.203473	7.03773	5.23713	0.00108658	0.00430501	-1.56992	3080	2962	2886	3588	3403	3397
SPAC644.08	0.327814	5.59243	5.23454	0.00108974	0.00431484	-1.46512	1152	973	1021	1347	1335	1299
SPCC1259.15c	0.330198	6.25456	5.23367	0.00109082	0.0043164	-1.53496	1697	1784	1494	2066	2070	2172
SPAC11D3.11c	0.246638	5.23651	5.23023	0.00109504	0.0043235	-1.41278	849	867	807	1025	1038	962
SPBC106.06	-0.21063	7.71779	-5.22999	0.00109533	0.0043235	-1.5667	5739	5624	5163	4959	4710	4748
SPBC21B10.05c	-0.28227	6.07916	-5.23003	0.00109528	0.0043235	-1.52564	1966	1853	1630	1524	1498	1494
SPCC1322.16	0.421091	7.47103	5.23038	0.00109485	0.0043235	-1.57685	3960	4146	3149	5069	5025	5028
SPAC25B8.01	0.264701	5.87213	5.22681	0.00109925	0.00433628	-1.50976	1339	1367	1194	1578	1559	1592
SPBC25H2.06c	-0.416357	7.40673	-5.22528	0.00110114	0.00434105	-1.58612	5146	5115	4107	3605	3431	3790
SPCC1183.05c	0.284761	6.4282	5.22446	0.00110216	0.00434235	-1.55868	1885	1847	1957	2392	2352	2257
SPAC144.10c	0.24599	6.50327	5.22332	0.00110357	0.00434253	-1.56485	2135	1951	1990	2478	2481	2320
SPNCRNA.688	0.209458	6.14351	5.22343	0.00110343	0.00434253	-1.53944	1618	1610	1564	1905	1875	1819
SPCC1259.16	0.227085	5.77422	5.22122	0.00110618	0.00435012	-1.50621	1305	1240	1146	1487	1469	1406
SPBC1709.02c	-0.290707	8.83197	-5.21806	0.00111012	0.0043629	-1.37201	13010	12694	11140	10090	10241	10006
SPAC4F8.06	0.305906	6.14408	5.21613	0.00111253	0.00436968	-1.54805	1610	1599	1432	1869	1914	2012
SPCC320.12	-0.332446	5.58416	-5.21375	0.00111551	0.00437869	-1.49016	1396	1394	1148	1100	1050	1001
SPNCRNA.1237	0.686085	1.98407	5.21111	0.00111883	0.004389	-0.724206	81	86	61	122	130	117
SPAC144.12	-0.241046	8.39431	-5.21056	0.00111953	0.00438904	-1.47825	9272	8748	8651	8017	7510	7293
SPAC56F8.11	-0.413796	6.21112	-5.2064	0.00112479	0.00440421	-1.565	2276	2244	1754	1656	1545	1530
SPBC646.09c	-0.312398	9.41244	-5.20665	0.00112447	0.00440421	-1.27193	19348	19397	16756	15485	14768	14789
SPCC4G3.14	0.324475	7.4419	5.20585	0.00112548	0.00440421	-1.61071	3882	4074	3403	4624	4854	4856
SPNCRNA.1273	1.44097	2.25212	5.20509	0.00112645	0.00440528	-0.764508	48	64	112	190	218	169
SPAC23D3.05c	-0.281259	5.41879	-5.19845	0.00113491	0.00443565	-1.4842	1114	1170	1154	980	951	926
SPCC895.06	-0.208809	7.83975	-5.19747	0.00113617	0.00443783	-1.594	6017	6067	5868	5393	5201	5108
SPCC1620.08	0.200671	7.2553	5.19647	0.00113745	0.00444009	-1.62549	3642	3519	3239	4125	4038	3904
SPAC869.09	2.01464	-1.73447	5.19318	0.00114168	0.00445116	-0.408067	2	5	3	14	19	11
SPBC19C7.11	0.213764	5.89992	5.19349	0.00114128	0.00445116	-1.55425	1416	1352	1276	1632	1559	1546
SPCC330.03c	-1.07533	3.33426	-5.19152	0.00114382	0.00445676	-1.03684	397	446	252	191	166	156
SPBC2G5.05	0.447098	11.0148	5.19002	0.00114576	0.00446157	-1.03576	46599	44862	38267	57501	61306	59121
SPAC6F12.15c	0.311027	5.87181	5.18714	0.00114949	0.00447336	-1.55846	1246	1259	1329	1656	1572	1575
SPAC4F10.07c	0.659614	6.65105	5.18285	0.00115507	0.00449232	-1.61942	1730	1833	2315	3016	3107	3178
SPNCRNA.843	-0.327474	7.10891	-5.18184	0.0011564	0.00449475	-1.64016	4076	3939	3302	3004	3017	3056
SPBPB2B2.07c	1.96605	-0.738745	5.18119	0.00115724	0.00449527	-0.395428	4	8	10	22	32	33
SPAC212.07c	1.07611	0.747913	5.17939	0.0011596	0.00450169	-0.527588	22	31	31	58	69	52
SPBC2G2.15c	-0.304081	5.39921	-5.17609	0.00116394	0.00451576	-1.50841	1135	1109	1175	960	920	916
SPCC1259.06	0.233484	5.39544	5.16943	0.00117273	0.00454712	-1.51651	984	938	908	1138	1151	1073
SPBC1815.01	0.854746	13.1295	5.1687	0.00117371	0.00454813	-0.794533	178955	178331	133326	257518	289783	346503
SPAC23G3.06	-0.286598	9.35389	-5.16754	0.00117524	0.00454853	-1.33091	18277	17300	17119	14841	14987	13847
SPCC74.03c	0.282315	7.83858	5.1678	0.00117491	0.00454853	-1.62938	5088	4876	5169	6235	6220	6141
SPCC191.10	3.26297	-2.51563	5.16693	0.00117606	0.00454891	-0.533835	0	1	3	11	17	11
SPAC6G10.12c	0.592537	6.33971	5.16567	0.00117774	0.00455265	-1.623	1809	1804	1258	2427	2393	2511
SPAC1142.05	-0.567139	5.61299	-5.16366	0.00118042	0.00456021	-1.55149	1724	1473	1192	1024	1045	899
SPNCRNA.566	1.11557	0.992392	5.15859	0.00118722	0.00458369	-0.588922	33	24	43	77	69	68
SPCC4G3.12c	0.559287	6.33505	5.15674	0.00118971	0.00459052	-1.63422	1501	1504	1871	2428	2507	2284
SPBC23G7.04c	-0.361509	5.40847	-5.15014	0.00119864	0.00461957	-1.5413	1150	1126	1236	917	927	914
SPCC191.07	0.326722	9.6057	5.14989	0.00119898	0.00461957	-1.30843	17837	17615	15390	21593	22239	20461
SPCC330.20	-0.469312	5.23658	-5.14957	0.00119942	0.00461957	-1.51019	1250	1097	910	799	778	784
SPAC1556.03	0.194943	6.78809	5.14542	0.00120508	0.00463576	-1.67535	2596	2559	2379	2994	2940	2779
SPBC25B2.06c	-0.295576	6.45597	-5.1456	0.00120484	0.00463576	-1.65864	2472	2519	2118	2053	1869	1919
SPAPB8E5.09	-0.256108	8.37906	-5.1415	0.00121046	0.00465364	-1.56727	9180	9253	8144	7447	7560	7425
SPAC12B10.16c	0.256702	6.76545	5.14026	0.00121216	0.00465736	-1.68076	2420	2455	2380	2904	2862	2994
SPCC622.13c	0.444212	4.47705	5.13736	0.00121617	0.00466993	-1.37199	453	433	509	651	649	611
SPAC1142.06	-0.228946	8.0478	-5.13443	0.00122022	0.00468269	-1.64207	7269	6971	6658	6150	5820	6038
SPCC1235.10c	0.339448	6.58727	5.13308	0.00122209	0.00468702	-1.68108	2051	1986	2200	2699	2628	2638
SPAC10F6.07c	-0.444663	3.62116	-5.12932	0.00122733	0.00470427	-1.19304	391	347	311	278	245	254
SPAC1002.18	-0.29576	5.92747	-5.12571	0.00123238	0.00471225	-1.64125	1658	1724	1537	1377	1275	1397
SPAC3G9.13c	0.199158	6.77529	5.12588	0.00123214	0.00471225	-1.69932	2613	2510	2336	2987	2873	2788
SPCC11E10.04	-0.295854	5.99749	-5.12668	0.00123102	0.00471225	-1.64672	1734	1652	1776	1429	1430	1387
SPCC364.05	0.436086	5.52643	5.12588	0.00123215	0.00471225	-1.58837	908	926	1063	1369	1293	1284
SPAC1F7.09c	0.268151	5.99947	5.1242	0.00123449	0.0047175	-1.65003	1370	1476	1405	1735	1735	1700
SPCC1450.07c	0.287359	6.01583	5.12168	0.00123804	0.00472823	-1.65457	1453	1430	1386	1676	1831	1761
SPAC1834.02	0.24957	8.81769	5.1199	0.00124056	0.00473498	-1.49713	10464	10338	9405	12202	12341	11700
SPBC32C12.02	0.392043	5.90447	5.11921	0.00124153	0.00473584	-1.64579	1264	1401	1157	1755	1807	1507
SPBC12C2.12c	0.636643	7.80804	5.11796	0.00124329	0.00473777	-1.68461	4813	5082	3409	6894	6754	6928
SPBC15D4.12c	-0.529829	2.63823	-5.11711	0.0012445	0.00473777	-0.985237	191	197	158	136	119	126
SPBC1709.10c	-0.393542	6.18837	-5.11675	0.00124502	0.00473777	-1.67515	2301	2078	1750	1670	1526	1496
SPCC645.10	-0.234522	6.17742	-5.1169	0.00124479	0.00473777	-1.67497	2055	1899	1777	1675	1664	1577
SPCC613.08	-0.361929	6.20147	-5.11519	0.00124723	0.00474335	-1.67834	2136	2226	1750	1664	1583	1537
SPBC409.05	0.297427	6.48216	5.11391	0.00124905	0.00474742	-1.69964	2132	2036	1731	2464	2432	2405
SPBC14F5.02	-0.198614	7.27734	-5.11246	0.00125112	0.0047496	-1.73096	4115	4078	3923	3726	3493	3453
SPBC649.02	-0.441378	7.93746	-5.11289	0.00125049	0.0047496	-1.6815	7385	7707	5890	5086	5014	5390
SPBC31F10.07	-0.206159	6.98044	-5.11056	0.00125382	0.00475702	-1.72581	3420	3289	3181	2960	2822	2879
SPAC3A12.14	0.307346	8.51103	5.1085	0.00125677	0.00476536	-1.5787	8525	8240	7219	9749	10001	10126
SPBC428.19c	-0.218849	7.49891	-5.10731	0.00125847	0.00476898	-1.73431	4815	4970	4454	4286	4017	4052
SPAC521.04c	0.628461	6.55394	5.1053	0.00126137	0.00477712	-1.71127	1737	1638	2178	2905	3038	2669
SPBC16H5.14c	-0.241827	5.53644	-5.10437	0.0012627	0.00477931	-1.62074	1237	1238	1203	1060	1027	1056
SPAC23A1.15c	-0.242592	5.20203	-5.10249	0.00126541	0.00478672	-1.56544	1010	1009	902	865	826	802
SPAC5H10.10	-0.387783	5.55885	-5.09865	0.00127097	0.00480249	-1.62905	1427	1399	1124	1068	972	998
SPNCRNA.781	0.672344	6.00304	5.09857	0.00127109	0.00480249	-1.6776	1316	1509	944	2030	2058	1884
SPBC800.09	0.297063	8.31532	5.09668	0.00127383	0.00480997	-1.63619	6888	6929	7129	8601	8700	8713
SPCC1840.06	0.452199	8.22039	5.09575	0.00127518	0.00481222	-1.6532	7016	6543	5190	8895	8687	8119
SPNCRNA.256	-1.10625	-0.199613	-5.09303	0.00127916	0.00482435	-0.521557	34	29	29	18	14	11
SPAC4F10.22	0.552339	3.02031	5.08878	0.00128538	0.00484495	-1.1055	181	144	164	230	255	238
SPAC1F12.06c	-0.370467	6.2657	-5.08692	0.00128812	0.00484951	-1.71879	2057	2056	2272	1765	1632	1590
SPBC6B1.06c	0.217865	6.38542	5.08706	0.00128791	0.00484951	-1.72785	1948	1960	1749	2278	2255	2111
SPAC1D4.10	-0.195891	6.49477	-5.08474	0.00129133	0.00485872	-1.73774	2397	2350	2289	2116	2080	2011
SPNCRNA.24	-0.628688	2.3865	-5.08393	0.00129253	0.00486037	-0.967891	168	164	142	118	108	85
SPAC12G12.06c	-0.232521	8.05619	-5.07673	0.00130322	0.00489766	-1.713	7120	6889	7018	6203	5976	5917
SPBC3E7.14	-0.222572	6.20817	-5.07489	0.00130596	0.00490506	-1.73026	2058	1982	1790	1745	1668	1630
SPAC14C4.03	0.630099	3.05753	5.06897	0.00131484	0.00493551	-1.13709	151	150	189	252	268	241
SPBC543.07	0.229202	6.84256	5.06331	0.0013234	0.00496469	-1.78045	2526	2690	2514	3118	3049	2986
SPNCRNA.334	-0.798792	1.67604	-5.06214	0.00132518	0.00496843	-0.838994	117	104	87	72	57	50
SPAC11H11.03c	-0.244449	5.39597	-5.06119	0.00132662	0.00497091	-1.65233	1105	1170	1067	981	940	928
SPBC2F12.12c	0.234082	6.23175	5.05885	0.00133019	0.00498136	-1.75217	1674	1686	1691	2076	1990	1938
SPBC1703.08c	-0.250441	7.1801	-5.05824	0.00133112	0.0049819	-1.79715	4132	3911	3512	3356	3372	3074
SPAC23C11.13c	-0.290057	7.7355	-5.05593	0.00133465	0.00498923	-1.78152	5878	6216	5141	4968	4608	4626
SPAC4H3.16	-0.212342	5.56141	-5.05628	0.00133412	0.00498923	-1.68513	1290	1230	1186	1099	1080	1052
SPNCRNA.897	0.526981	6.51604	5.05541	0.00133544	0.00498927	-1.77302	2076	2061	1483	2697	2657	2742
SPNCRNA.698	0.334573	5.02498	5.05422	0.00133727	0.00499315	-1.59064	679	780	659	932	895	866
SPAC23A1.06c	0.26608	6.58088	5.05299	0.00133916	0.00499727	-1.78202	2051	2170	2144	2645	2544	2543
SPNCRNA.1399	-0.794214	1.69124	-5.04913	0.0013451	0.00501651	-0.858035	119	105	87	72	58	51
SPBC21B10.03c	0.244687	8.57086	5.04785	0.00134709	0.00502099	-1.64219	8653	8675	8153	10064	10195	10226
SPCC1322.02	-0.228719	5.09613	-5.04658	0.00134905	0.00502533	-1.61543	928	908	863	805	763	759
SPCC1919.02	-0.4047	5.69179	-5.04341	0.00135398	0.00504075	-1.71649	1551	1475	1319	1228	1147	951
SPAC1687.23c	1.21697	-0.409859	5.04273	0.00135503	0.00504171	-0.563166	14	12	9	28	33	23
SPNCRNA.1259	0.899433	4.29471	5.04051	0.00135849	0.00505161	-1.44311	393	442	242	621	659	701
SPAC1296.01c	0.217631	7.19036	5.03652	0.00136474	0.0050719	-1.82479	3443	3315	3122	3832	3875	3894
SPAC24H6.04	0.271583	8.99154	5.03501	0.00136711	0.00507772	-1.56685	11420	11253	11100	13627	13785	13785
SPNCRNA.1026	0.740648	4.08884	5.03262	0.00137087	0.00508872	-1.41245	291	284	396	533	513	572
SPCC1840.07c	-0.252141	6.24571	-5.03201	0.00137184	0.00508933	-1.78718	2094	2026	1920	1822	1748	1561
SPAC13F5.01c	-0.266569	5.47007	-5.0247	0.00138343	0.00512936	-1.71044	1239	1169	1136	982	974	1021
SPNCRNA.111	-0.671442	6.08001	-5.02332	0.00138563	0.00513452	-1.78058	2437	2310	1582	1297	1333	1320
SPBC25B2.10	0.375391	5.91558	5.02201	0.00138773	0.00513928	-1.76962	1217	1275	1377	1777	1632	1655
SPAC1687.18c	-0.196739	6.90621	-5.01785	0.0013944	0.00516098	-1.84027	3245	3112	3007	2888	2717	2652
SPNCRNA.1186	0.67059	2.53843	5.01707	0.00139565	0.00516262	-1.08301	109	106	120	201	155	185
SPAC227.06	0.252185	6.78885	5.014	0.0014006	0.00517791	-1.84075	2634	2508	2257	2914	3032	2944
SPNCRNA.271	-0.975949	-0.0315733	-5.01209	0.00140369	0.00518631	-0.629138	31	38	30	16	16	18
SPAC14C4.01c	0.222425	5.99927	5.00325	0.00141808	0.00523118	-1.80276	1542	1433	1347	1750	1712	1629
SPAC4G9.17c	-0.225155	6.62422	-5.00311	0.0014183	0.00523118	-1.84771	2790	2585	2412	2291	2282	2150
SPNCRNA.1606	-0.499887	4.19527	-5.0041	0.00141669	0.00523118	-1.47705	509	507	574	375	358	401
SPBC3B9.01	0.763548	7.4675	5.00155	0.00142087	0.00523762	-1.85256	3929	3789	2413	5857	5483	5656
SPCC18.10	-0.282737	6.89451	-4.99817	0.00142643	0.00525504	-1.86479	3357	3414	2827	2737	2669	2543
SPBC56F2.11	-0.345193	8.33933	-4.99449	0.0014325	0.00527436	-1.76002	8615	8596	9405	7055	7224	6906
SPBC725.04	0.355174	6.43533	4.99188	0.00143684	0.00528727	-1.85043	1919	1983	1687	2255	2578	2388
SPAC1039.04	-0.297416	5.55338	-4.98922	0.00144126	0.00529793	-1.76783	1390	1251	1162	1090	995	1037
SPAC25B8.20	-0.284789	4.85277	-4.98914	0.0014414	0.00529793	-1.639	777	795	753	695	638	597
SPBC2G2.10c	-0.402363	4.09565	-4.98848	0.00144249	0.00529887	-1.47608	521	445	469	387	377	332
SPBC8D2.07c	-0.276316	7.06439	-4.98677	0.00144535	0.0053063	-1.88475	3604	3445	3692	3042	2963	2953
SPNCRNA.902	-0.397388	5.35358	-4.98505	0.00144823	0.00531379	-1.73927	1191	1233	1006	868	828	932
SPBC405.04c	0.398327	7.21003	4.98307	0.00145155	0.00532292	-1.89154	3456	3387	2627	4281	4147	4096
SPAC637.07	-0.277697	9.60207	-4.98203	0.00145331	0.00532627	-1.51967	21248	21175	19984	17426	17285	17280
SPAC1782.12c	-0.392123	7.47025	-4.97984	0.001457	0.00533425	-1.89303	5474	5290	4157	3833	3835	3730
SPNCRNA.1195	0.454143	4.01227	4.97974	0.00145716	0.00533425	-1.46749	330	311	366	488	470	432
SPBPB21E7.07	-0.557543	6.48152	-4.97884	0.00145869	0.00533677	-1.86813	3159	2736	2112	1815	1816	1795
SPBC2D10.16	-0.376174	3.51825	-4.97572	0.00146396	0.00534989	-1.36271	321	319	310	246	236	258
SPNCRNA.796	-0.231999	6.47818	-4.97612	0.00146328	0.00534989	-1.8741	2421	2453	2177	2054	1970	2036
SPAC22F3.10c	0.26004	8.38576	4.9741	0.00146672	0.0053552	-1.77647	7359	7400	7515	9133	9010	8830
SPBPB7E8.01	-0.548375	7.5008	-4.97387	0.0014671	0.0053552	-1.89516	5365	4608	6088	3804	3612	3624
SPBC25D12.05	-0.331545	6.72297	-4.9709	0.00147217	0.00536754	-1.89259	3093	3089	2497	2435	2265	2241
SPNCRNA.999	0.379056	5.94735	4.97131	0.00147147	0.00536754	-1.83718	1396	1440	1128	1797	1647	1744
SPBC16H5.08c	-0.303834	9.89177	-4.96813	0.0014769	0.00538172	-1.48881	26516	26723	23826	21433	20588	20958
SPAC1F7.12	0.314664	6.54183	4.96454	0.00148306	0.00540107	-1.89181	2034	2180	1885	2505	2480	2673
SPCC622.11	0.714602	5.55936	4.96303	0.00148567	0.00540746	-1.79139	803	800	1118	1501	1567	1379
SPBC685.03	0.332589	4.871	4.96212	0.00148723	0.00541005	-1.67629	652	595	655	821	790	806
SPAC26F1.13c	-0.244293	9.03768	-4.95672	0.00149658	0.00543553	-1.65665	14393	14198	13142	12029	12085	11463
SPBC12D12.07c	-0.264851	6.83699	-4.9574	0.0014954	0.00543553	-1.91467	3243	3072	2833	2802	2486	2410
SPBC19G7.17	-0.327975	7.44691	-4.9561	0.00149766	0.00543553	-1.92541	5021	4462	4782	4038	3991	3469
SPBC947.10	0.379567	6.81609	4.95645	0.00149706	0.00543553	-1.91468	2307	2310	2596	3235	3259	2978
SPAC323.03c	-0.219349	5.48485	-4.95271	0.00150357	0.00545386	-1.80488	1185	1195	1142	1063	999	995
SPAC31A2.05c	0.352453	6.12234	4.95168	0.00150537	0.00545727	-1.87858	1530	1384	1588	2009	1950	1840
SPAC4A8.11c	-0.312265	9.96978	-4.94922	0.00150968	0.00546978	-1.49999	27444	26967	27021	22962	22597	20814
SPAC22G7.11c	0.331786	5.68442	4.94823	0.00151141	0.00546984	-1.83709	1154	1137	1052	1429	1555	1278
SPBC1105.12	-0.701799	8.0949	-4.94837	0.00151117	0.00546984	-1.85485	9845	9877	6292	5086	5282	5396
SPNCRNA.677	0.210619	6.31766	4.94115	0.00152391	0.00551193	-1.90811	1845	1788	1772	2182	2058	2081
SPBC14F5.08	-0.198292	7.2783	-4.94049	0.00152508	0.00551214	-1.94881	4167	4163	3801	3635	3496	3545
SPBC1718.06	0.280815	7.37783	4.94014	0.0015257	0.00551214	-1.94758	3690	3532	3782	4481	4577	4445
SPAC11D3.17	0.232346	5.72174	4.9375	0.00153041	0.00551972	-1.8568	1176	1234	1140	1447	1371	1395
SPBC1348.11	1.81505	0.264954	4.93805	0.00152942	0.00551972	-0.733176	13	14	19	62	75	35
SPNCRNA.217	-0.990742	-0.112896	-4.93791	0.00152968	0.00551972	-0.707133	36	28	30	16	14	17
SPBC12C2.01c	-0.245941	6.45391	-4.93684	0.00153158	0.00552081	-1.92271	2425	2280	2257	2135	1963	1841
SPAC637.04	0.210395	7.07235	4.92891	0.00154579	0.00556887	-1.95896	3038	3050	3032	3640	3552	3472
SPBC21C3.07c	-0.235282	5.75051	-4.92313	0.00155624	0.00560334	-1.87894	1493	1395	1372	1290	1227	1141
SPBC32H8.01c	-0.343409	3.67744	-4.9212	0.00155974	0.00561277	-1.46806	345	365	340	298	274	264
SPAC5D6.04	0.524194	6.48892	4.92026	0.00156146	0.00561579	-1.94342	1721	1673	2095	2762	2723	2455
SPNCRNA.834	0.525051	2.31423	4.91958	0.0015627	0.00561706	-1.15712	108	107	87	149	155	135
SPBC30D10.18c	-0.567801	7.65345	-4.91884	0.00156405	0.00561874	-1.95579	6681	6782	4674	4032	4002	4138
SPBC25H2.18	-0.37501	5.26231	-4.91727	0.0015669	0.00562581	-1.80975	1125	1161	915	874	834	777
SPNCRNA.1046	0.898328	3.34132	4.91323	0.00157433	0.00564927	-1.39034	145	168	241	358	320	338
SPCC297.04c	-0.357535	5.09791	-4.91084	0.00157872	0.00566185	-1.78702	962	913	952	836	705	693
SPNCRNA.993	0.977148	1.03219	4.90569	0.00158825	0.00569278	-0.901775	33	37	35	70	87	56
SPNCRNA.45	-0.864321	0.818122	-4.8978	0.00160296	0.00574227	-0.877542	60	56	56	36	25	35
SPAC12B10.01c	0.39851	6.79129	4.89225	0.00161341	0.00577321	-1.9958	2263	2222	2562	3148	3244	2978
SPNCRNA.222	2.2065	-2.38387	4.8924	0.00161312	0.00577321	-0.757604	1	4	1	9	9	11
SPAPJ696.02	0.245623	7.83476	4.8914	0.001615	0.00577566	-1.98043	5352	5343	4627	6139	6059	6108
SPCC1840.01c	-0.293726	5.85187	-4.89068	0.00161638	0.00577731	-1.93145	1518	1539	1605	1298	1258	1285
SPBC11C11.04c	0.208981	6.6229	4.88884	0.00161987	0.00578654	-1.99359	2302	2269	2115	2766	2604	2444
SPCC16C4.07	-0.414711	6.63338	-4.88557	0.00162608	0.00580219	-1.99714	3167	2912	2341	2226	2139	1976
SPCC16C4.18c	0.274617	7.8227	4.88586	0.00162553	0.00580219	-1.98852	4991	5377	4665	6039	6064	6236
SPAC4C5.04	-0.249585	4.94843	-4.88494	0.00162727	0.00580322	-1.79154	859	809	786	690	705	690
SPAC1687.15	0.202091	7.63186	4.88446	0.00162819	0.00580324	-2.00974	4545	4688	4258	5251	5282	5137
SPNCRNA.1218	0.532383	2.52131	4.87954	0.00163759	0.00583347	-1.25419	119	111	117	183	179	147
SPCC576.10c	0.287586	7.97643	4.87831	0.00163997	0.00583865	-1.97692	5815	5883	4974	6710	6868	6910
SPCC1235.15	0.357674	7.28044	4.87644	0.00164357	0.00584492	-2.0288	3634	3595	2843	4499	4232	4238
SPCC63.12c	0.451408	7.53753	4.87674	0.00164298	0.00584492	-2.01983	4335	4156	3194	5193	5431	5380
SPCC553.02	-0.186566	7.36391	-4.87291	0.00165038	0.00586585	-2.03559	4422	4329	4066	3809	3865	3701
SPAC17A2.12	-0.430823	5.72728	-4.87024	0.00165557	0.00587976	-1.94147	1424	1419	1653	1149	1121	1089
SPBC18H10.04c	-0.351538	10.0009	-4.86994	0.00165614	0.00587976	-1.59578	27986	29562	26905	21855	21828	23146
SPBC1347.07	-0.228091	6.05199	-4.86933	0.00165734	0.00588073	-1.97896	1764	1729	1741	1584	1470	1463
SPAC16E8.17c	-0.253054	6.62858	-4.86234	0.00167099	0.00592587	-2.02796	2680	2808	2401	2267	2173	2237
SPCC1739.04c	0.229078	5.63935	4.85979	0.00167599	0.00594029	-1.94609	1148	1098	1110	1349	1360	1266
SPAC9G1.07	0.198433	6.04777	4.85582	0.00168384	0.00596476	-1.99599	1558	1528	1418	1750	1773	1697
ENSRNA049678178	1.61797	-2.15051	4.85513	0.0016852	0.00596626	-0.771427	3	2	3	10	11	7
SPAC323.08	-0.340773	3.29674	-4.85375	0.00168795	0.00597267	-1.4675	277	267	261	223	208	211
SPBC2A9.10	-0.400049	5.5266	-4.84905	0.0016973	0.00600241	-1.94146	1400	1390	1092	1046	938	975
SPNCRNA.93	0.684811	2.0788	4.8467	0.001702	0.00601568	-1.19314	75	76	92	145	134	115
SPAC20H4.05c	-0.226625	5.68637	-4.84596	0.00170348	0.00601759	-1.97046	1440	1325	1298	1173	1185	1148
SPBC16H5.07c	0.245643	8.68529	4.84367	0.00170809	0.00603049	-1.877	9734	9431	8454	11101	11165	10744
SPAC29A4.14c	-0.214921	6.08707	-4.84222	0.00171099	0.00603739	-2.01707	1801	1792	1745	1551	1541	1555
SPNCRNA.1101	-0.378536	3.99344	-4.83839	0.00171874	0.00606136	-1.64471	434	426	464	344	344	339
SPNCRNA.1078	0.284614	5.15181	4.83659	0.00172238	0.00607085	-1.89343	760	843	747	967	964	958
SPBC244.01c	0.182768	7.43919	4.83431	0.00172702	0.00608381	-2.08412	4001	4066	3811	4689	4512	4422
SPBC14C8.10	-0.229015	7.07683	-4.82897	0.00173794	0.00611888	-2.08782	3650	3458	3548	3217	2974	2999
SPBC1539.07c	-0.265994	6.71511	-4.82639	0.00174322	0.00613119	-2.07815	2864	2952	2593	2280	2372	2407
SPNCRNA.1538	0.207039	6.40677	4.82632	0.00174336	0.00613119	-2.06205	1986	1996	1781	2307	2279	2132
SPBC36B7.04	-0.216911	6.92099	-4.8254	0.00174526	0.00613447	-2.0874	3260	3307	2966	2938	2681	2668
SPBC15C4.03	-0.2051	6.09724	-4.82326	0.00174967	0.00614658	-2.0425	1813	1781	1764	1632	1565	1501
SPNCRNA.1090	-0.363483	3.60791	-4.82176	0.00175277	0.00615405	-1.57915	362	346	301	267	258	266
SPAC30D11.01c	0.331758	6.05636	4.81457	0.00176772	0.00620314	-2.04925	1384	1424	1520	1880	1905	1717
SPAC806.11	0.703182	7.87219	4.8133	0.00177038	0.00620902	-2.06167	5231	5067	3355	7127	7788	7116
SPBC582.07c	0.214526	7.98129	4.80835	0.00178077	0.00624202	-2.06788	6057	5769	5304	6710	6695	6641
SPCC1494.01	-0.267179	4.70363	-4.80679	0.00178406	0.00625012	-1.84183	688	699	696	594	581	573
SPAC22G7.01c	-0.204471	7.28132	-4.79846	0.00180172	0.00629809	-2.13187	4111	4017	4044	3603	3586	3486
SPBC839.14c	-0.326658	4.94315	-4.79985	0.00179876	0.00629809	-1.89952	802	868	842	700	640	683
SPCC18.03	0.238593	7.26945	4.79936	0.00179981	0.00629809	-2.13004	3627	3649	3105	4238	4116	3994
SPNCRNA.1184	-0.216707	5.11965	-4.79866	0.00180129	0.00629809	-1.93705	938	924	870	816	779	780
SPBC3D6.10	0.188725	6.16852	4.79747	0.00180384	0.00630204	-2.08188	1689	1667	1557	1907	1889	1860
SPBC32H8.06	0.593866	2.08943	4.79684	0.00180518	0.00630324	-1.26015	84	87	80	115	135	135
SPAC1834.05	-0.243889	7.3314	-4.792	0.00181555	0.00633252	-2.13991	4278	4141	4358	3731	3629	3544
SPAPB17E12.12c	-0.262768	5.1708	-4.79203	0.0018155	0.00633252	-1.95524	1021	980	879	860	780	784
SPAC4D7.06c	-0.206264	6.09419	-4.78643	0.00182758	0.00637097	-2.09003	1814	1784	1751	1647	1534	1506
SPAC2F7.07c	-0.218598	7.11607	-4.7852	0.00183025	0.00637338	-2.14575	3635	3612	3661	3254	3194	3028
SPCC622.19	-0.425827	4.8733	-4.78519	0.00183028	0.00637338	-1.90334	900	893	697	661	587	617
SPAC24B11.05	0.371914	5.40456	4.78304	0.00183494	0.00638612	-2.00741	917	882	916	1247	1277	1037
SPBC4B4.04	-0.210495	8.27021	-4.77538	0.00185171	0.00644094	-2.05791	8056	8242	7910	7196	7018	6933
SPCC417.06c	0.875801	2.19121	4.77472	0.00185315	0.00644242	-1.30405	99	95	57	168	154	135
SPAC24B11.10c	-0.214916	6.88246	-4.7741	0.00185452	0.00644367	-2.15269	3030	3219	3020	2768	2686	2614
SPAC1071.08	-0.647632	6.80596	-4.77158	0.00186008	0.00645241	-2.15129	3681	4075	2624	2111	2180	2299
SPCC757.09c	-0.404333	8.63163	-4.77208	0.00185898	0.00645241	-1.98067	10825	10298	12189	8773	8453	8205
SPNCRNA.746	-0.544077	2.95632	-4.7718	0.00185958	0.00645241	-1.49154	256	237	193	177	146	151
SPAC1952.13	0.64112	6.82298	4.76913	0.00186549	0.00646411	-2.15498	1990	2004	2683	3406	3554	3451
SPNCRNA.1008	0.26094	5.76039	4.76953	0.0018646	0.00646411	-2.07785	1290	1247	1081	1497	1499	1378
SPBC6B1.05c	0.343022	5.30731	4.76513	0.00187438	0.00649139	-2.01421	889	908	770	1132	1015	1143
SPBC32F12.11	0.73043	13.2409	4.76148	0.00188253	0.00651604	-1.2908	200658	206167	147557	293176	286819	340627
SPNCRNA.905	-0.254959	5.40229	-4.7608	0.00188406	0.00651781	-2.03814	1129	1180	1060	971	914	967
SPCP1E11.08	-0.19028	7.86323	-4.75952	0.00188693	0.00652417	-2.14885	6174	6067	5891	5549	5255	5259
SPNCRNA.828	0.427542	2.49696	4.7585	0.00188922	0.00652854	-1.40423	129	115	110	162	162	157
SPNCRNA.1614	0.331171	3.9816	4.75396	0.00189945	0.00656034	-1.75124	333	361	332	426	446	432
SPCC1442.08c	0.410959	7.13158	4.75295	0.00190173	0.00656463	-2.18681	3223	3266	2449	4036	3929	3947
SPAC607.04	-0.342166	5.05894	-4.75117	0.00190578	0.00657503	-1.98581	1011	943	793	750	739	693
SPBC17A3.04c	-0.250083	8.47206	-4.75044	0.00190743	0.00657717	-2.04592	9931	9173	9150	7969	7906	8107
SPBC19C2.03	-0.268609	7.01631	-4.7492	0.00191024	0.00658328	-2.18955	3611	3662	3111	3009	3009	2682
SPBC1773.15	-0.279677	5.85074	-4.74664	0.00191609	0.00659985	-2.11803	1567	1507	1562	1388	1294	1182
SPAC227.05	-0.350226	5.68338	-4.74485	0.00192016	0.00661031	-2.0997	1513	1500	1233	1147	1191	1021
SPBC31E1.01c	0.636249	5.65847	4.7438	0.00192258	0.00661197	-2.09098	880	898	1211	1580	1536	1515
SPNCRNA.770	-0.308482	8.86293	-4.74373	0.00192272	0.00661197	-1.96743	11928	13052	12802	10351	10429	10056
SPAC26A3.02	0.223052	6.06892	4.74282	0.00192482	0.00661558	-2.14444	1499	1534	1496	1831	1736	1775
SPCC1902.01	-0.308456	7.66321	-4.73921	0.00193312	0.00664053	-2.19433	5584	5141	5730	4562	4623	4245
SPAC1296.02	0.405243	7.64896	4.73654	0.00193929	0.00665186	-2.19603	4458	4794	3562	5736	5684	5592
SPBC1734.06	-0.192699	6.37468	-4.73642	0.00193956	0.00665186	-2.17708	2166	2222	2080	1974	1879	1865
SPNCRNA.1068	0.489076	4.35331	4.73655	0.00193927	0.00665186	-1.85454	472	461	336	600	601	584
SPAC26H5.04	0.355525	5.33278	4.73353	0.00194626	0.0066684	-2.05979	863	812	926	1109	1127	1119
SPNCRNA.1518	0.200687	5.42446	4.73344	0.00194648	0.0066684	-2.07791	1004	998	919	1157	1131	1103
SPAC31G5.13	0.273814	7.94317	4.73074	0.00195275	0.00668628	-2.17359	5966	5563	4850	6943	6598	6399
SPBC646.14c	-0.195408	6.56793	-4.72997	0.00195454	0.00668879	-2.1972	2476	2516	2409	2276	2184	2074
SPNCRNA.1168	-0.41427	2.68971	-4.72857	0.00195781	0.00669637	-1.48764	190	179	173	150	131	130
SPCC1739.07	-0.315351	5.79341	-4.72786	0.00195949	0.00669851	-2.13589	1664	1490	1369	1315	1244	1111
SPAC4H3.10c	0.484649	12.4382	4.72607	0.00196367	0.0067092	-1.42456	117784	117157	107506	151888	159485	172680
SPAC15E1.08	-0.278466	6.48338	-4.7241	0.0019683	0.00672142	-2.19965	2545	2497	2158	2053	1895	2040
SPAC4F10.11	-0.239352	6.65828	-4.72094	0.00197575	0.00674166	-2.21319	2681	2607	2712	2289	2313	2245
SPBC1711.05	-0.417998	7.61619	-4.72033	0.00197717	0.00674166	-2.22021	5862	6066	4711	4266	3855	4396
SPNCRNA.1338	0.434598	3.32143	4.72023	0.00197741	0.00674166	-1.64335	203	218	205	318	262	277
SPAC24H6.03	0.306568	6.37137	4.71953	0.00197907	0.0067437	-2.19819	1795	1753	1881	2434	2154	2201
SPAC19G12.11	0.222676	6.76302	4.7186	0.00198128	0.00674762	-2.22067	2565	2544	2233	2872	2937	2834
SPCC1840.11	-0.239393	7.29227	-4.71608	0.00198725	0.00676431	-2.2391	4198	4369	3863	3833	3452	3358
SPBC16D10.09	-0.221721	8.50708	-4.70992	0.00200195	0.00681069	-2.09119	9992	9887	8814	8523	8196	8097
SPAC1071.03c	-0.204359	6.92289	-4.70867	0.00200496	0.00681661	-2.23965	3306	3089	3103	2889	2718	2722
SPBC16H5.09c	-0.261283	5.73238	-4.70785	0.0020069	0.00681661	-2.15547	1491	1366	1388	1277	1135	1168
SPCC23B6.05c	0.962254	2.71144	4.70796	0.00200665	0.00681661	-1.50574	103	89	161	226	225	219
SPAC140.01	-0.24563	8.27347	-4.70672	0.00200963	0.00682222	-2.14652	8242	8132	8184	6945	6913	7078
SPAC139.04c	0.240468	6.22248	4.70587	0.00201166	0.00682548	-2.20557	1762	1728	1526	2086	1910	1986
SPAC26H5.13c	-0.40291	7.03748	-4.70436	0.00201532	0.00683115	-2.24845	3712	3361	3964	3041	2818	2574
SPCC1919.14c	0.246876	5.32299	4.70429	0.00201548	0.00683115	-2.09792	909	893	876	1065	1128	1020
SPAC2G11.13	0.413903	5.79695	4.7009	0.00202368	0.00685526	-2.16994	1149	1113	1255	1716	1633	1392
SPBC3H7.03c	0.201842	8.39938	4.70017	0.00202544	0.00685759	-2.12797	8035	7693	7246	9046	8922	8705
SPAC1610.04	0.238617	6.03932	4.69916	0.00202791	0.00686017	-2.19892	1551	1536	1335	1855	1714	1697
SPBC13G1.15c	-0.549246	2.26621	-4.69853	0.00202945	0.00686017	-1.42679	143	139	141	111	85	97
SPBC36.01c	-0.639496	5.99502	-4.69895	0.00202842	0.00686017	-2.19095	1808	1712	2341	1312	1270	1182
SPNCRNA.195	-0.815952	2.39826	-4.69547	0.0020369	0.00688172	-1.45498	183	201	132	117	89	88
SPAC19G12.04	-0.321017	4.4744	-4.69413	0.00204018	0.00688912	-1.93919	650	611	552	477	522	467
SPAC3G9.17	-0.314748	4.32224	-4.69243	0.00204434	0.00689951	-1.90812	547	536	543	481	432	409
SPAC26A3.01	0.244	9.03708	4.68856	0.00205383	0.00692787	-2.00301	12115	11925	11173	14069	14615	13450
SPCC663.18	0.40159	8.16253	4.68682	0.00205814	0.00693635	-2.19096	6410	6783	5122	8175	7971	8097
SPNCRNA.1662	-0.250137	5.10153	-4.68666	0.00205853	0.00693635	-2.07934	929	913	887	825	735	760
SPCC584.12	-0.598566	2.71808	-4.68393	0.00206529	0.00695544	-1.54853	201	205	184	150	143	104
SPNCRNA.1239	0.356228	3.69518	4.68187	0.0020704	0.00696894	-1.77983	268	286	280	380	367	332
SPBC3D6.11c	0.203753	5.81078	4.681	0.00207256	0.00697254	-2.20005	1292	1316	1206	1480	1508	1449
SPAC1420.02c	-0.246128	8.65322	-4.67878	0.00207809	0.00698746	-2.09902	11287	11078	9684	9309	8975	8940
SPCC16C4.04	-0.272825	5.24981	-4.67829	0.00207931	0.00698785	-2.11869	996	1061	993	920	832	800
SPAC4D7.10c	0.244555	5.31459	4.67635	0.00208416	0.00700045	-2.13314	871	947	849	1092	1061	1037
SPAC589.04	-0.244347	6.02993	-4.67541	0.00208654	0.00700472	-2.22939	1784	1691	1710	1591	1416	1420
SPAC1D4.11c	0.404226	6.58743	4.67274	0.00209322	0.00702346	-2.27165	1932	1937	2240	2692	2825	2632
SPBC685.08	-0.386084	4.12699	-4.67049	0.00209891	0.00703881	-1.89249	554	463	444	398	374	354
SPNCRNA.684	0.589026	2.75251	4.66303	0.00211782	0.00709851	-1.58317	143	149	110	191	226	193
SPNCRNA.1133	0.497316	4.65826	4.66252	0.00211911	0.00709909	-2.01715	547	583	430	780	793	646
SPCC1450.08c	-0.509739	1.73349	-4.65447	0.00213976	0.00716446	-1.3653	99	100	89	69	65	70
SPAC23H3.13c	0.410281	7.03553	4.65273	0.00214426	0.00717576	-2.31623	3151	2900	2312	3963	3769	3429
SPAC10F6.11c	0.205887	7.28678	4.64943	0.00215278	0.00720049	-2.32689	3670	3707	3240	4179	4175	4001
SPAC1805.14	-0.216412	6.65968	-4.6479	0.00215677	0.00721004	-2.3094	2729	2758	2466	2414	2359	2144
SPNCRNA.1696	0.895298	6.90152	4.64664	0.00216006	0.00721723	-2.31568	2614	2587	1425	4078	3943	3999
SPAC29E6.10c	-0.251103	7.39372	-4.64266	0.00217045	0.00724815	-2.33505	4376	4439	4558	3917	3883	3565
SPAC4G9.19	0.512464	5.02387	4.64032	0.00217658	0.00726479	-2.12151	650	585	764	1023	932	906
SPBC1347.12	0.494099	3.75465	4.63379	0.00219379	0.00731839	-1.85444	260	262	309	377	401	400
SPBC29A10.07	0.209319	8.24474	4.63322	0.00219532	0.00731965	-2.24924	6925	6865	6773	8135	7929	7964
SPBC17F3.02	0.519	7.02959	4.63105	0.00220107	0.0073337	-2.34405	2503	2435	3061	3766	3762	3994
SPCC1739.08c	-0.494778	3.73612	-4.63076	0.00220184	0.0073337	-1.85457	426	382	348	321	277	234
SPAC1071.12c	-0.320627	5.01341	-4.62223	0.00222467	0.0073981	-2.14617	963	865	807	691	699	740
SPCC13B11.03c	-0.509294	2.76283	-4.62279	0.00222316	0.0073981	-1.6401	184	198	208	147	128	143
SPRRNA.29	2.22854	-4.49137	4.62258	0.00222373	0.0073981	-1.21177	0	0	0	3	2	1
SPCC188.09c	0.658032	6.1909	4.61947	0.00223211	0.00741898	-2.31304	1286	1400	1569	2243	2715	1874
SPCC162.05	0.294772	6.11746	4.61875	0.00223405	0.00742154	-2.31146	1572	1610	1394	1822	1869	1977
SPAC922.07c	-0.396273	4.43408	-4.61638	0.00224045	0.00743892	-2.03169	688	606	522	458	467	463
SPCP31B10.02	0.231787	4.77771	4.6151	0.00224393	0.00744657	-2.10797	633	624	588	771	726	693
SPAC227.08c	0.345829	4.46432	4.61462	0.00224525	0.00744706	-2.04086	503	515	414	652	609	574
SPNCRNA.1250	-0.400824	5.66538	-4.61392	0.00224716	0.00744951	-2.26867	1478	1601	1200	1147	1044	1065
SPBC776.04	-0.224203	6.78096	-4.6129	0.00224993	0.0074548	-2.36079	2930	2814	2921	2609	2458	2430
SPAC2C4.05	-0.208147	8.05022	-4.61004	0.00225773	0.00747674	-2.31739	7223	7217	6367	6297	6078	5798
SPAC1A6.11	0.64312	1.34388	4.60845	0.00226209	0.00748339	-1.33926	52	45	50	86	79	68
SPBC17D1.03c	-0.322841	6.2797	-4.60853	0.00226186	0.00748339	-2.33807	2357	2161	1846	1831	1685	1608
SPAC20G8.07c	0.19394	7.07426	4.60325	0.00227637	0.0075228	-2.38365	3262	3104	2833	3617	3532	3469
SPBC1703.04	-0.232479	5.39237	-4.60358	0.00227547	0.0075228	-2.24324	1175	1087	1058	940	975	939
SPAC22G7.02	0.295289	6.82479	4.60183	0.00228031	0.00753191	-2.37696	2399	2447	2619	3198	3030	3023
SPNCRNA.1603	0.364873	3.21355	4.60033	0.00228446	0.00754169	-1.7759	199	192	204	269	260	245
SPBP23A10.07	-0.21241	8.65316	-4.5998	0.00228592	0.00754258	-2.20341	10703	10630	10258	9292	9382	8887
SPAC18B11.07c	0.402289	7.18647	4.59935	0.00228716	0.00754276	-2.39015	3252	3481	2576	4073	4132	4131
SPAC20G4.05c	0.237869	5.09971	4.59738	0.00229265	0.00755693	-2.19661	807	768	727	901	947	895
SPBC1348.12	-0.801056	3.03041	-4.59646	0.00229521	0.00755754	-1.73052	298	301	199	170	164	125
SPBC15D4.14	-0.176601	6.74661	-4.59665	0.00229467	0.00755754	-2.38108	2869	2798	2658	2602	2459	2383
SPCC970.10c	-0.241255	6.53996	-4.59422	0.00230144	0.00757412	-2.3744	2432	2447	2496	2188	2150	1971
SPCC4G3.15c	0.190631	7.33802	4.59352	0.00230341	0.00757671	-2.40112	3755	3812	3481	4243	4250	4238
SPBC3B8.06	0.207494	7.0998	4.59069	0.00231132	0.00759878	-2.40105	3246	3215	2858	3668	3558	3632
SPAC1952.06c	-0.30534	6.56456	-4.58786	0.00231928	0.007621	-2.38375	2585	2406	2687	2205	2092	1979
SPBC23G7.12c	0.297383	7.88744	4.58647	0.00232319	0.00762992	-2.37126	5517	5590	4537	6466	6571	6295
SPCC338.15	0.254279	8.41218	4.58337	0.00233196	0.00765475	-2.27883	8058	7884	6864	9050	9381	8965
SPAC24H6.05	0.493771	7.04656	4.58252	0.00233437	0.00765871	-2.40898	2613	2429	3126	3973	3916	3670
SPAC1805.18	-0.301641	4.77808	-4.57996	0.00234165	0.00767864	-2.15421	766	700	756	638	611	571
SPCC622.05	0.425585	3.97493	4.57589	0.00235327	0.00771275	-1.98178	377	343	275	467	440	436
SPAC22G7.10	0.211709	7.95858	4.5754	0.00235468	0.00771339	-2.37736	5596	5779	5479	6509	6736	6476
SPCC1281.08	-0.204391	6.28299	-4.57374	0.00235944	0.007725	-2.38505	2071	2110	1916	1795	1852	1699
SPAC19G12.17	-0.201606	5.48223	-4.57264	0.0023626	0.00773137	-2.29979	1195	1165	1134	1033	1049	988
SPBC21D10.05c	0.205808	7.58777	4.57117	0.00236682	0.00773858	-2.42276	4479	4466	4123	5037	5018	5162
SPNCRNA.693	0.78282	3.45656	4.57102	0.00236724	0.00773858	-1.86247	179	176	267	347	377	334
SPBC36.09	-0.182131	6.82932	-4.56974	0.00237094	0.0077467	-2.41999	2990	3064	2782	2725	2618	2524
SPCC1020.03	0.300782	5.03994	4.56717	0.00237836	0.00776693	-2.2243	746	770	649	948	927	819
SPAC959.10	-0.269024	4.09997	-4.56392	0.0023878	0.00778976	-2.02798	463	477	432	398	388	364
SPBC2F12.02c	-0.182794	6.37759	-4.56397	0.00238765	0.00778976	-2.40496	2219	2136	2103	1945	1921	1882
SPAP27G11.16	0.688534	1.51359	4.56308	0.00239023	0.00779369	-1.43166	61	59	44	95	95	77
SPAC20H4.04	-0.212312	5.71012	-4.56049	0.00239781	0.0078144	-2.34796	1456	1337	1317	1203	1212	1167
SPNCRNA.216	0.42823	3.03969	4.55638	0.00240982	0.00784953	-1.79247	167	167	182	235	226	240
SPAC17H9.19c	0.179719	6.00977	4.5557	0.00241182	0.00785201	-2.3863	1495	1505	1414	1739	1690	1623
SPNCRNA.1208	0.30581	5.6994	4.55442	0.00241559	0.00786025	-2.3533	1127	1093	1189	1397	1484	1374
SPNCRNA.620	-0.301316	4.8669	-4.5525	0.00242125	0.00787464	-2.20906	808	776	777	649	700	590
SPAC1B3.13	-0.401169	8.1375	-4.55162	0.00242386	0.00787909	-2.3755	7690	7235	8710	6361	5947	5776
SPAC23H4.11c	-0.280413	5.19508	-4.5475	0.00243607	0.00791472	-2.28133	1053	1028	870	855	820	775
SPAC1687.12c	-0.240478	6.47063	-4.54314	0.00244907	0.00794883	-2.43842	2439	2502	2104	2032	2032	1947
SPNCRNA.294	-1.78092	-0.573166	-4.54353	0.00244791	0.00794883	-1.12585	44	31	19	6	10	10
SPAC1565.07c	0.230556	5.89735	4.54253	0.00245091	0.00795077	-2.39256	1418	1314	1282	1705	1575	1482
SPAC823.16c	0.241509	5.3484	4.54163	0.0024536	0.00795544	-2.31749	969	943	824	1126	1108	1031
SPCC825.05c	0.24855	6.06942	4.53902	0.00246143	0.00797674	-2.4136	1478	1508	1505	1908	1713	1774
SPBC428.13c	0.490003	3.60516	4.53802	0.00246445	0.00798244	-1.94649	252	228	269	338	344	380
SPAPB24D3.05c	-0.340756	3.0039	-4.53696	0.00246763	0.00798869	-1.81125	226	222	209	185	170	169
SPNCRNA.1093	1.82308	-1.6305	4.53629	0.00246965	0.00799115	-1.09738	2	6	4	15	18	11
SPBP16F5.03c	0.210693	6.88131	4.53366	0.00247759	0.0080087	-2.46998	2668	2663	2657	3169	3224	2954
SPCC962.03c	-0.302805	7.21739	-4.53372	0.00247743	0.0080087	-2.47924	3935	3862	4262	3443	3240	3191
SPCP1E11.07c	-0.317463	5.11683	-4.53251	0.0024811	0.00801597	-2.28574	966	964	895	804	823	670
SPNCRNA.789	-0.338449	5.06083	-4.53101	0.00248564	0.00802655	-2.27655	1014	945	789	751	746	691
SPAPB17E12.06	-0.240443	5.28077	-4.53048	0.00248725	0.00802768	-2.32056	1005	1043	1032	897	880	856
SPAC12G12.03	-0.511912	7.24576	-4.52954	0.00249011	0.00803281	-2.48218	4283	3909	5097	3321	3135	2920
SPNCRNA.771	0.256417	5.28722	4.52567	0.00250194	0.00806688	-2.32772	891	930	788	1094	1066	986
SPCC16C4.11	0.270649	5.16193	4.52395	0.0025072	0.00807975	-2.30616	818	752	807	994	943	958
SPAC4A8.10	0.417206	7.09981	4.52277	0.00251082	0.00808732	-2.49043	2667	2792	3223	4019	3828	3829
SPAC1486.10	-0.424854	7.28031	-4.52128	0.0025154	0.00809384	-2.49468	4199	4056	4918	3440	3295	3155
SPAC23C11.08	0.296309	5.53205	4.52146	0.00251487	0.00809384	-2.37405	952	1055	1040	1300	1243	1232
SPAC56F8.03	-0.23604	8.81603	-4.51979	0.00251999	0.00809428	-2.2734	11840	11904	11897	10555	10299	9766
SPBC16C6.07c	0.236756	7.90868	4.51949	0.00252094	0.00809428	-2.45875	5747	5607	4833	6463	6485	6263
SPBC25H2.10c	-0.226814	6.30466	-4.51864	0.00252357	0.00809428	-2.46011	2052	2110	2071	1818	1751	1813
SPCC1620.12c	0.190988	7.2602	4.51909	0.00252216	0.00809428	-2.50002	3532	3488	3439	4223	3921	3927
SPCC16A11.01	-0.285124	6.11868	-4.51835	0.00252445	0.00809428	-2.44551	1985	1760	1852	1502	1629	1508
SPCC594.04c	-0.271642	4.9808	-4.52025	0.00251859	0.00809428	-2.2755	883	896	755	725	693	699
SPCC736.15	0.630473	10.7653	4.51913	0.00252203	0.00809428	-1.92915	38236	39091	26358	55667	53744	50108
SPNCRNA.1197	0.568729	2.41103	4.51763	0.00252667	0.00809732	-1.6944	100	97	122	160	160	155
SPBC16D10.05	0.476558	7.09016	4.51648	0.00253025	0.0081047	-2.49823	2525	2733	3205	4133	3978	3735
SPCC1259.11c	-0.298708	7.44352	-4.51402	0.00253788	0.00812507	-2.50451	4786	4395	4905	4111	3799	3665
SPNCRNA.1450	-0.266595	4.98868	-4.51204	0.00254405	0.00814069	-2.28808	842	843	853	711	746	675
SPAC26A3.17c	-0.366216	5.43178	-4.50948	0.00255205	0.00816219	-2.37336	1254	1293	1038	930	886	988
SPNCRNA.801	0.734252	2.0657	4.50813	0.00255626	0.00817155	-1.62345	77	89	70	113	155	132
SPNCRNA.277	-0.632254	1.61293	-4.50661	0.00256103	0.00818267	-1.52767	90	87	100	68	55	57
SPCC285.09c	0.29784	6.45185	4.50527	0.00256526	0.00819206	-2.48742	1907	1894	1955	2510	2518	2139
SPNCRNA.1154	1.29785	1.03605	4.49978	0.00258257	0.00824321	-1.40095	20	36	43	96	74	67
SPBC12C2.05c	0.181001	5.93477	4.49817	0.0025877	0.0082513	-2.456	1425	1435	1329	1623	1603	1571
SPBP23A10.13	0.208283	6.7635	4.4984	0.00258695	0.0082513	-2.51277	2513	2394	2462	2899	2863	2839
SPBP8B7.18c	-0.266964	6.43329	-4.49702	0.00259133	0.00825873	-2.49773	2377	2310	2224	1943	1823	2043
SPAC589.02c	0.644521	5.01246	4.49649	0.00259303	0.00825999	-2.308	573	550	786	1020	1025	924
SPCC63.03	1.3956	2.4122	4.4957	0.00259554	0.00826384	-1.6965	59	63	136	215	253	171
SPBC1604.25	-0.248514	5.75171	-4.49466	0.00259888	0.00827034	-2.44066	1434	1429	1417	1261	1146	1236
SPAC17G8.08c	-0.353455	7.28932	-4.49026	0.00261294	0.0083054	-2.53732	4565	4728	3674	3350	3359	3485
SPBP8B7.31	-0.335884	5.19442	-4.48999	0.00261382	0.0083054	-2.35761	1121	1000	888	832	756	815
[truncated: 4,356 more rows]
